# Supplementary material for: Electricity-driven three-component reductive coupling reaction for the synthesis of diarylmethylamine
Source: Royal Society of Chemistry journal article supplement (doi:10.1039/d2cc05330f), 2022-01-01

# Supporting Information

## Electricity-Driven Three-Component Reductive Coupling Reaction for the Synthesis of Diarylmethylamine

Lei Yang,<sup>a</sup> Maolin Sun,<sup>b</sup> Liming Cao,<sup>a</sup> Chaoming Liang,<sup>b</sup> Jiasheng Yang,<sup>a</sup> Junjun Yi,<sup>a</sup> Ruihua Cheng,<sup>b</sup>  
Yueyue Ma,<sup>\*b</sup> and Jinxing Ye<sup>\*ab</sup>

<sup>a</sup> Engineering Research Centre of Pharmaceutical Process Chemistry, Ministry of Education; Shanghai Key Laboratory of New Drug Design; School of Pharmacy, East China University of Science and Technology, 130 Meilong Road, Shanghai 200237, China.

E-mail: yejx@ecust.edu.cn

<sup>b</sup> Address here. School of Biomedical and Pharmaceutical Sciences, Guangdong University of Technology, Guangzhou 510006, China.

E-mail: mayueyue20121@gdut.edu.cn; jinxingye@gdut.edu.cn

|                                                              |    |
|--------------------------------------------------------------|----|
| A: General Remarks .....                                     | 3  |
| B: Optimization Tables .....                                 | 4  |
| C: General Procedure for the Electrolysis.....               | 5  |
| D: Cyclic Voltammograms Studies.....                         | 7  |
| E: Mechanistic Experiments.....                              | 9  |
| F: Characterization Data for the Electrolysis Products ..... | 11 |
| G: Unsuccessful Substrates .....                             | 29 |
| H: NMR Spectra of Products. ....                             | 31 |

## A: General Remarks

$^1\text{H}$  NMR spectra and  $^{13}\text{C}$  NMR spectra were recorded on a Bruker AV-400/600 spectrometer (400/600 MHz and 100/150 MHz). Chemical shifts ( $\delta$ ) for protons are reported in parts per million (ppm) downfield from tetramethylsilane and are referenced to residual solvent peak. Chemical shifts ( $\delta$ ) for carbon are reported in parts per million (ppm) downfield from tetramethylsilane and are referenced to the carbon resonances of the solvent. Data are reported as follows: chemical shift, multiplicity (br = broad, s = singlet, d = doublet, dd = doublet of doublets, t = triplet, dt = doublet of triplets, q = quartet, quint = quintet, m = multiplet), coupling constants ( $J$ ) in Hertz (Hz), integration; “app” is used to denote the apparent splitting of a signal.

High resolution mass spectrometry (HRMS) was carried out using MicroMass GCT CA 055 instrument and recorded on a MicroMass LCTTM spectrometer.

The CV experiments were carried out in a three-electrode cell configuration with a glassy carbon (GC) working electrode (3 mm diameter) and a platinum wire counter electrode. The potentials were measured versus an Ag/AgCl reference electrode.

All solvents and substrates were from commercial sources (Adamas-beta, TCI, or Energy Chemical) and used without purification unless otherwise noted.

## B: Optimization Tables

Table S1. Optimization of three-component reductive coupling reaction<sup>[a]</sup>

c1ccc(cc1)C=O (1a) + c1ccc(cc1)CN (2a) + c1ccncc1C#N (3a)  $\xrightarrow[\text{MeOH/CH}_3\text{CN (1:1), RT, Air, 3 h}]{\text{Zn(+)||RVC(-), 5 mA, } n\text{Bu}_4\text{NClO}_4 \text{ (0.075 M)}}$  c1ccc(cc1)C(NCc2ccncc2)C#N (4a)

| Entry             | Condition                                                                  | Yield [%] <sup>[b]</sup> |
|-------------------|----------------------------------------------------------------------------|--------------------------|
| 1                 | MeCN as a solvent                                                          | 24                       |
| 2                 | MeOH as solvent                                                            | 33                       |
| 3                 | DCM as solvent                                                             | 13                       |
| 4                 | DMSO as solvent                                                            | trace                    |
| 5 <sup>[c]</sup>  | None                                                                       | 44                       |
| 6 <sup>[d]</sup>  | DCM/MeCN (1:1) as solvents                                                 | 43                       |
| 7                 | MeOH/MeCN (1:2) as solvents                                                | 25                       |
| 8                 | MeOH/MeCN (2:1) as solvents                                                | 35                       |
| 9                 | 1.5 equiv. C <sub>6</sub> H <sub>5</sub> COOH added                        | 81                       |
| 10                | 1.5 equiv. C <sub>2</sub> H <sub>5</sub> COOH added                        | 43                       |
| 11                | 1.5 equiv. CF <sub>3</sub> COOH added                                      | 25                       |
| 12                | 1.5 equiv. <i>p</i> -TsOH added                                            | 55                       |
| 13                | 1.5 equiv. ZnCl <sub>2</sub> added                                         | 40                       |
| 14                | 1.5 equiv. Zn(OTf) <sub>2</sub> added                                      | 42                       |
| 15                | 1.5 equiv. 2-OMe-C <sub>6</sub> H <sub>4</sub> COOH added                  | 66                       |
| 16                | 1.5 equiv. 2-F-C <sub>6</sub> H <sub>4</sub> COOH added                    | 80                       |
| 17                | 1.5 equiv. 2-F-4-NO <sub>2</sub> -C <sub>6</sub> H <sub>4</sub> COOH added | n.d.                     |
| 18                | 0.5 equiv. C <sub>6</sub> H <sub>5</sub> COOH added                        | 58                       |
| 19                | 2.0 equiv. C <sub>6</sub> H <sub>5</sub> COOH added                        | 79                       |
| 20 <sup>[e]</sup> | C(+)-RVC(-) as electrodes                                                  | 38                       |
| 21 <sup>[e]</sup> | CF(+)-RVC(-) as electrodes                                                 | 20                       |
| 22 <sup>[e]</sup> | RVC(+)-Pt(-) as electrodes                                                 | trace                    |
| 23 <sup>[e]</sup> | RVC(+)-Ni(-) as electrodes                                                 | trace                    |
| 24 <sup>[e]</sup> | RVC(+)-Zn(-) as electrodes                                                 | trace                    |
| 25 <sup>[e]</sup> | The ratio of <b>1a</b> , <b>2a</b> and <b>3a</b> (1:1:2, 1:1:3, 1:2:3)     | trace                    |
| 26 <sup>[e]</sup> | <i>n</i> Bu <sub>4</sub> NBF <sub>4</sub> as electrolyte                   | 60                       |
| 27 <sup>[e]</sup> | <i>n</i> Bu <sub>4</sub> NBr as electrolyte                                | 32                       |
| 28 <sup>[e]</sup> | LiClO <sub>4</sub> as electrolyte                                          | 46                       |
| 29 <sup>[e]</sup> | 3 mA (5 h)                                                                 | 44                       |
| 30 <sup>[e]</sup> | 8 mA (2 h)                                                                 | 75                       |
| 31 <sup>[e]</sup> | 0 °C                                                                       | 44                       |
| 32 <sup>[e]</sup> | 50 °C                                                                      | 70                       |
| 33 <sup>[e]</sup> | Inert gas protection                                                       | 75                       |
| 34 <sup>[e]</sup> | No electric current                                                        | n.d.                     |
| 35 <sup>[e]</sup> | Electrolysis overnight                                                     | 65                       |

[a] Reactions were performed with **1a** (0.9 mmol), **2a** (0.9 mmol), **3a** (0.3 mmol), *n*Bu<sub>4</sub>NClO<sub>4</sub> (0.3 mmol), MeOH/MeCN (2/2 mL), Zn(+)-RVC(-) as electrodes, undivided cell, 5 mA constant current for 3 h. [b] Isolated yield. [c] 2.2 V cell voltage after 3 h of electrolysis. [d] 5.7 V cell voltage after 3 h of electrolysis. [e] 1.5 equiv. PhCOOH added.



**Table S2.** Optimization of reductive coupling reaction involving 2-methylpentanal<sup>[a]</sup>

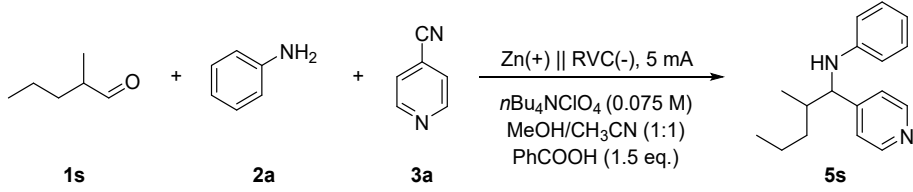

1s + 2a + 3a  $\xrightarrow[\text{MeOH/CH}_3\text{CN (1:1), PhCOOH (1.5 eq.)}]{\text{Zn(+)} \parallel \text{RVC(-), 5 mA}, n\text{Bu}_4\text{NClO}_4 (0.075 \text{ M})}$  5s

| Entry             | Condition                                              | Yield [%] <sup>[b]</sup> |
|-------------------|--------------------------------------------------------|--------------------------|
| 1                 | None                                                   | 6                        |
| 2                 | Inert gas protection                                   | trace                    |
| 3                 | DMA, CH <sub>3</sub> CN, DCM, MeOH as solvents         | n.d.                     |
| 4                 | CH <sub>3</sub> CN/DCM (1:1) as solvents               | 22                       |
| 5 <sup>[c]</sup>  | 4Å MS (100 mg)                                         | n.d.                     |
| 6 <sup>[c]</sup>  | 3.0 equiv. Et <sub>3</sub> N added                     | n.d.                     |
| 7 <sup>[c]</sup>  | 3.0 equiv. Ph <sub>3</sub> SiH added                   | 15                       |
| 8 <sup>[c]</sup>  | 3.0 equiv. <i>i</i> Pr <sub>3</sub> SiH added          | 20                       |
| 9 <sup>[c]</sup>  | <b>C<sub>2</sub>H<sub>5</sub>COOH as additive acid</b> | <b>27</b>                |
| 10 <sup>[c]</sup> | <i>p</i> -TsOH as additive acid                        | trace                    |

[a] Reactions were performed with **1s** (0.9 mmol), **2a** (0.9 mmol), **3a** (0.3 mmol), *n*Bu<sub>4</sub>NClO<sub>4</sub> (0.3 mmol), PhCOOH (0.45 mmol), additive (0.9 mmol), MeOH/MeCN (2/2 mL), Zn(+)-RVC(-) as electrodes, undivided cell, 5 mA constant current for 3 h. [b] Isolated yield. [c] CH<sub>3</sub>CN/DCM (1:1) as solvents.

## C: General Procedure for the Electrolysis

### C1: General procedure for the making of electrolytic cell

The anode and cathode were home-made using the commercially available material (Zinc flakes, RVC, silica gel plug, copper wire and stainless steel wire and glass test tube, Figure S1a). A Zinc flake electrode (33 × 6 × 0.2 mm<sup>3</sup>) with a copper wire and a RVC electrode (33 × 6 × 2.5 mm<sup>3</sup>) with a stainless wire were cross the silica gel plug. And the distance between two electrodes was almost 5 mm (Figure S1b).

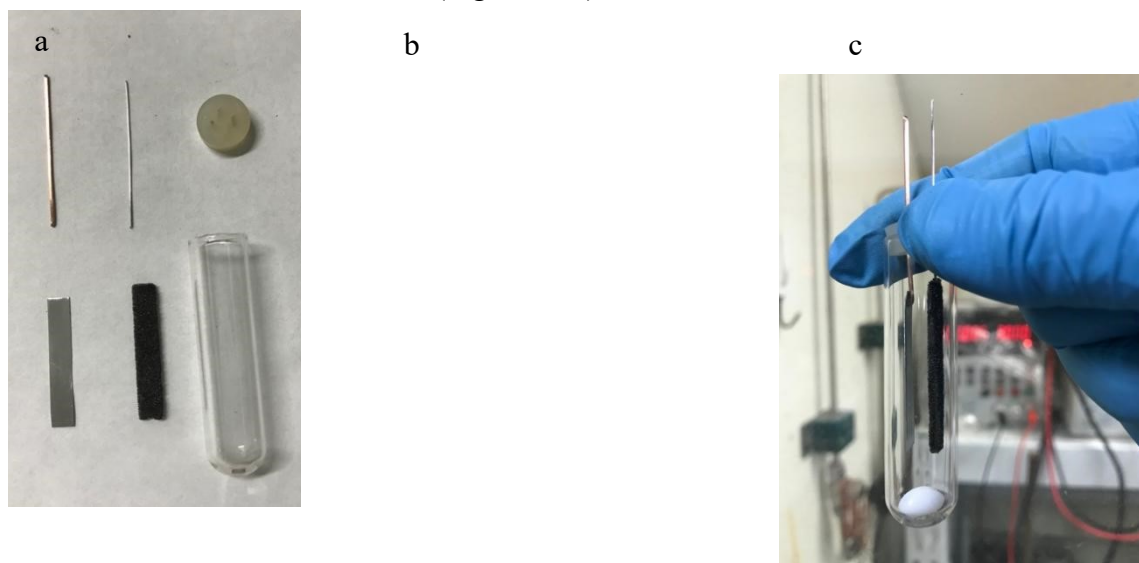

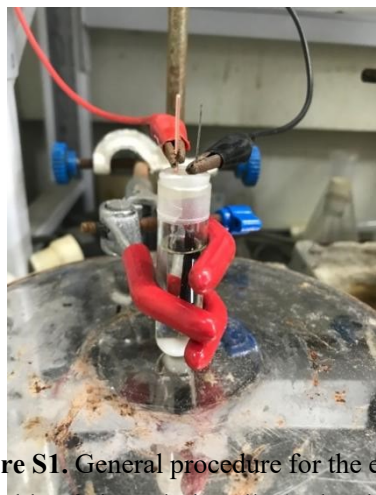

**Figure S1.** General procedure for the electrolysis. a) The materials used to make the electrolytic cell; b) The assemble of electrolytic cell; c) The electrolysis.

### C2: General procedure for electrolysis

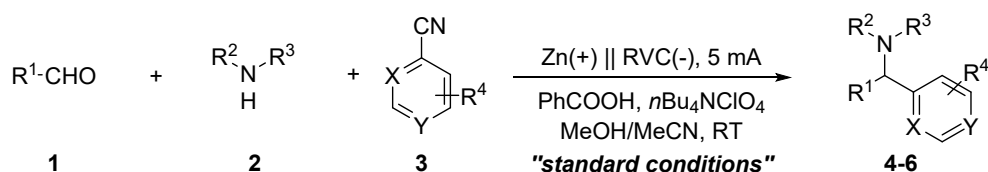

The test cube was charged with a stir bar, 0.9 mmol aldehydes, 0.9 mmol secondary or tertiary arylamines, 0.3 mmol cyanopyridine, 0.3 mmol *n*Bu<sub>4</sub>NClO<sub>4</sub>, 0.45 mmol benzoic acid, 2 mL CH<sub>3</sub>CN and 2 mL MeOH, and the suspension was stirred until the solids resolve. Then the assembled electrodes were placed into the solution and the silica gel plug was sealed with film. Then the mixture was electrolyzed at a constant current of 5 mA (Figure S1c) until the cyanopyridine was completely consumed. The RVC electrodes were ultrasonic washed with ethyl acetate twice and the reaction mixture was concentrated under reduced pressure. Ethyl acetate (30 mL) was added to the residue, washed with saturated sodium bicarbonate (30 mL) to remove benzoic acid, then washed with H<sub>2</sub>O, brine, dried over Na<sub>2</sub>SO<sub>4</sub>, filtered, and concentrated under reduced pressure. The resulting crude product was purified by silica gel column chromatography to afford the final product.

### C3: Large scale general procedure for electrolysis

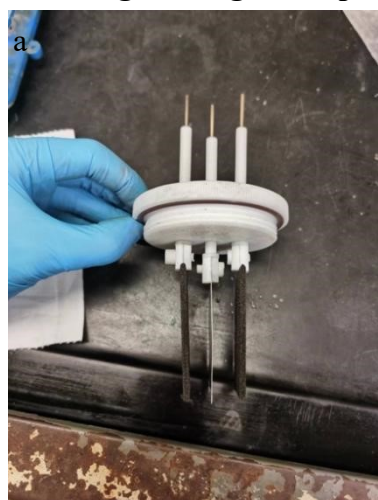

b

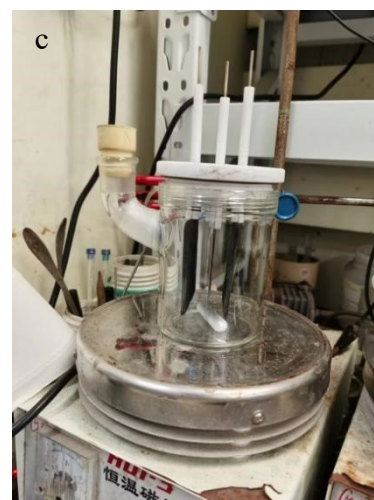

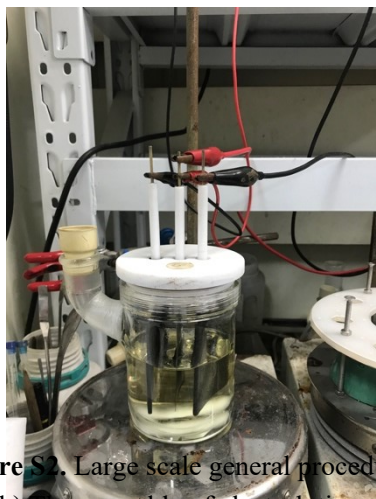

**Figure S2.** Large scale general procedure for the electrolysis. a) The materials used to make the electrolytic cell; b) The assemble of electrolytic cell; c) The electrolysis.

The Zinc flake anode ( $50 \times 55 \times 0.2 \text{ mm}^3$ ) and two RVC cathodes ( $50 \times 50 \times 0.25 \text{ mm}^3$ ) were assembled into sealed cap (Figure S2a and S2b). A beaker was charged with a stir bar, benzaldehyde **1a** (3.66 mL, 36 mmol), allylamine hydrochloride (3.37 g, 36 mmol) or *N*-methylbenzylamine (4.65 mL, 36 mmol), 4-cyanopyridine **3a** (1.25 g, 12 mmol), *n*Bu<sub>4</sub>NClO<sub>4</sub> (4.10 g, 12 mmol), benzoic acid (2.20 g, 20 mmol), 80 mL CH<sub>3</sub>CN and 80 mL MeOH, and the suspension was stirred until the solids resolve. Then the assembled electrode was placed into the solution. The mixture was electrolyzed at a constant current of 100 mA for 12 h (Figure S2c) until the substrate was completely consumed. The reaction electrodes were ultrasonic washed with ethyl acetate twice and the reaction mixture was concentrated under reduced pressure. Ethyl acetate (200 mL) was added to the residue, washed with saturated sodium bicarbonate (300 mL) to remove benzoic acid, then washed with H<sub>2</sub>O, brine, dried over Na<sub>2</sub>SO<sub>4</sub>, filtered, and concentrated under reduced pressure. The resulting crude product was purified by silica gel column chromatography to afford **4p** (1.56 g, 56%) or **4aj** (1.67 g, 61%).

## D: Cyclic Voltammograms Studies

### D1: Cyclic voltammetry experiments for some substrates

The cyclic voltammograms were recorded in an electrolyte of *n*Bu<sub>4</sub>NClO<sub>4</sub> (0.075 M) in CH<sub>3</sub>CN (4 mL) using a glassy carbon disk working electrode (diameter, 3 mm), a Pt wire auxiliary and the Ag/AgCl reference electrode. The scan rate is 100 mV/s. Each measurement was preceded by 3 minutes of N<sub>2</sub> pumped through a long needle.

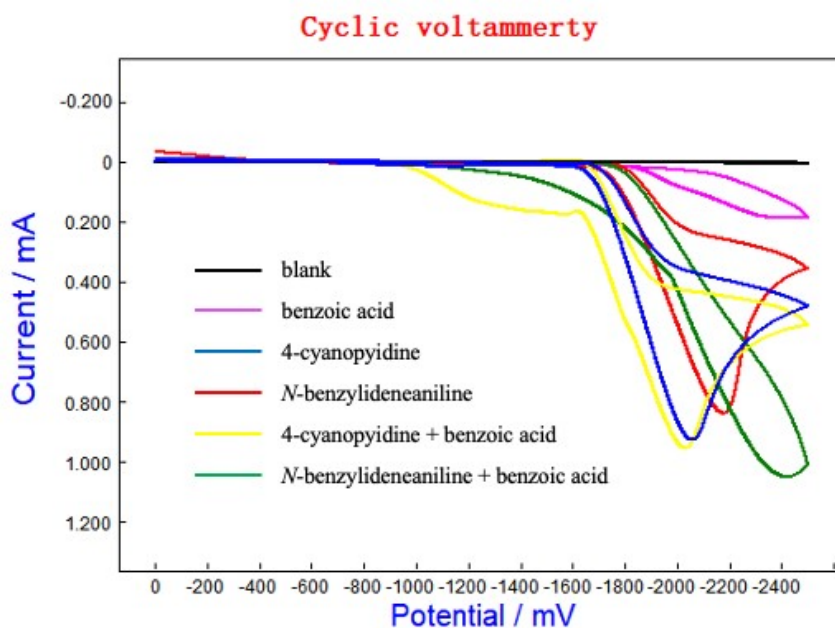

**Figure S3.** Black line: cyclic voltammogram of none in an electrolyte of  $n\text{Bu}_4\text{NClO}_4$  in  $\text{CH}_3\text{CN}$ ; Purple line: cyclic voltammogram of benzoic acid (0.025M) in an electrolyte of  $n\text{Bu}_4\text{NClO}_4$  in  $\text{CH}_3\text{CN}$ ; Blue line: cyclic voltammogram of 4-cyanopyridine (0.025 M) in an electrolyte of  $n\text{Bu}_4\text{NClO}_4$  in  $\text{CH}_3\text{CN}$ ,  $E_{p/2} = -1.85$  V; Red line: cyclic voltammogram of *N*-benzylideneaniline (0.025 M) in an electrolyte of  $n\text{Bu}_4\text{NClO}_4$  in  $\text{CH}_3\text{CN}$ ,  $E_{p/2} = -1.95$  V; Yellow line: cyclic voltammogram of 4-cyanopyridine and benzoic acid (0.025 M, respectively) in an electrolyte of  $n\text{Bu}_4\text{NClO}_4$  in  $\text{CH}_3\text{CN}$ ; Green line: cyclic voltammogram of *N*-benzylideneaniline and benzoic acid (0.025 M, respectively, electrolysis after stirring for 5 min) in an electrolyte of  $n\text{Bu}_4\text{NClO}_4$  in  $\text{CH}_3\text{CN}$ .

In Figure S3, cyclic voltammetry experiments showed that the reduction potential of 4-cyanopyridine was lower than that of pre-separated imine *N*-Benzylideneaniline. With the participation of benzoic acid, imine started reducing behavior at around -1.30 V, and 4-cyanopyridine also had obvious reduction behavior from -1.10 V, while benzoic acid itself had no reduction characteristic peak. In Figure S4, cyclic voltammetry experiments showed that compared with 4-cyanopyridine, the initial reduction potential was greatly reduced after adding an equivalent amount of benzoic acid, and the more benzoic acid was added, the stronger the current signal.

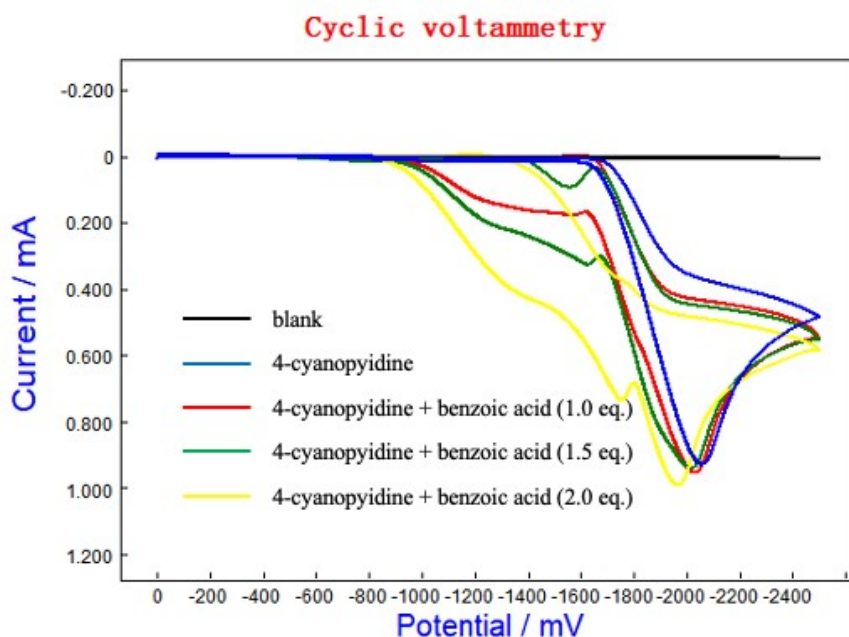

**Figure S4.** Black line: cyclic voltammogram of none in an electrolyte of  $n\text{Bu}_4\text{NClO}_4$  (0.075 M) in  $\text{CH}_3\text{CN}$  (4 mL); Blue line: cyclic voltammogram of 4-cyanopyridine (0.025 M) in an electrolyte of  $n\text{Bu}_4\text{NClO}_4$  in  $\text{CH}_3\text{CN}$ ; Red line: cyclic voltammogram of 4-cyanopyridine (0.025 M) and benzoic acid (0.025 M) in an electrolyte of  $n\text{Bu}_4\text{NClO}_4$  in  $\text{CH}_3\text{CN}$ ; Green line: cyclic voltammogram of 4-cyanopyridine (0.025 M) and benzoic acid (0.0375 M) in an electrolyte of  $n\text{Bu}_4\text{NClO}_4$  in  $\text{CH}_3\text{CN}$ ; Yellow line: cyclic voltammogram of 4-cyanopyridine (0.025 M) and benzoic acid (0.05 M) in an electrolyte of  $n\text{Bu}_4\text{NClO}_4$  in  $\text{CH}_3\text{CN}$ .

## D2: Comparison with and without benzoic acid involved in the reaction

In general, benzoic acid has a promotion effect on this electrochemical reaction process. Scheme S1 exemplifies some products and compares the reaction results with or without the participation of benzoic acid.

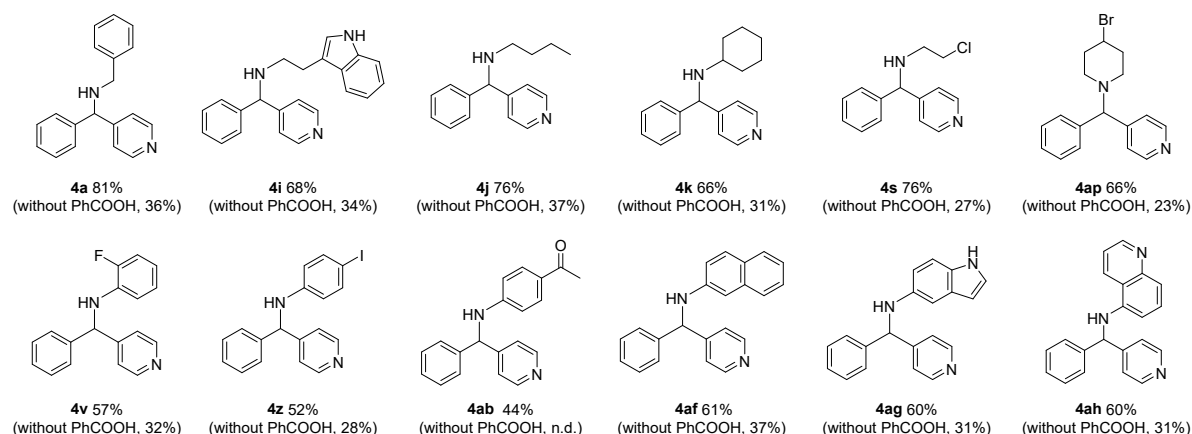

**Scheme S1.** Reaction results of some products with or without benzoic acid.

## E: Mechanistic Experiments

### E1: Divided cell experiment

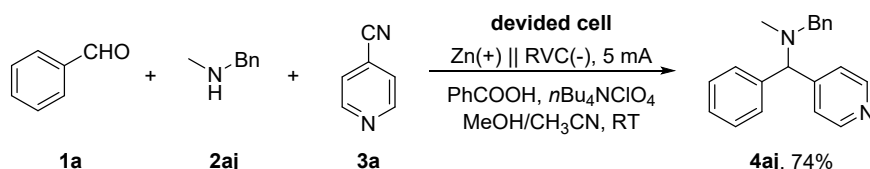

This control experiment was carried out in an H-type divided cell. The two compartments were separated by a DuPont Nafion PFSA membrane N-117. The anodic and cathodic chambers were charged with 0.9 mmol benzaldehyde **1a**, 0.9 mmol *N*-methylbenzylamine, 0.3 mmol 4-cyanopyridine **3a**, 0.3 mmol *n*Bu<sub>4</sub>NClO<sub>4</sub>, 0.45 mmol benzoic acid, 2 mL CH<sub>3</sub>CN and 2 mL MeOH respectively, and the suspension was stirred until the solids resolve. Then the assembled electrodes were placed into the solution. The mixture was electrolyzed at a constant current of 5 mA for 3 h. The cathodic RVC electrode was ultrasonic washed with ethyl acetate twice and the reaction mixture was concentrated under reduced pressure. Ethyl acetate (30 mL) was added to the residue, washed with saturated sodium bicarbonate (30 mL) to remove benzoic acid, then washed with H<sub>2</sub>O, brine, dried over Na<sub>2</sub>SO<sub>4</sub>, filtered, and concentrated under reduced pressure. The resulting crude product was purified by silica gel column chromatography to afford **4aj** (64 mg, 74% yield).

### E2: The determination of the imine intermediate

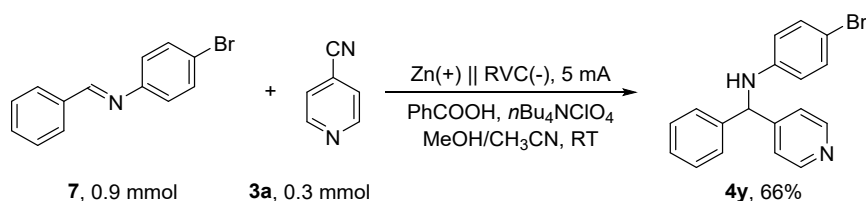

The test cube was charged with 0.9 mmol pre-separated imine **7**, 0.3 mmol 4-cyanopyridine **3a**, 0.3 mmol *n*Bu<sub>4</sub>NClO<sub>4</sub>, 0.45 mmol benzoic acid, 2 mL CH<sub>3</sub>CN and 2 mL MeOH, and the suspension was stirred until the solids resolve. Then the assembled electrodes were placed into the solution. The mixture was electrolyzed at a constant current of 5 mA for 3 h. The cathodic RVC electrode was ultrasonic washed with ethyl acetate twice and the reaction mixture was concentrated under reduced pressure. Ethyl acetate (30 mL) was added to the residue, washed with saturated sodium bicarbonate (30 mL) to remove benzoic acid, then washed with H<sub>2</sub>O, brine, dried over Na<sub>2</sub>SO<sub>4</sub>, filtered, and concentrated under reduced pressure. The resulting crude product was purified by silica gel column chromatography to afford **4y** (67 mg, 66% yield).

### E3: The radical trapping experiment

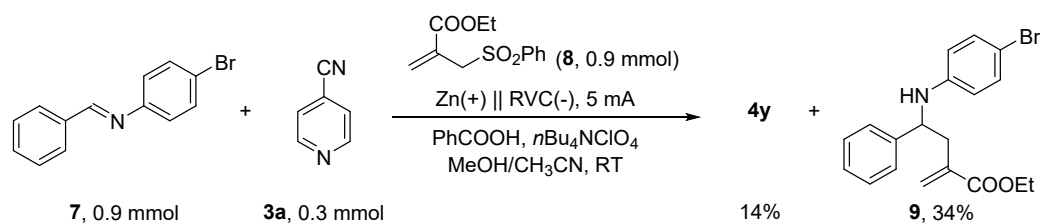

The test cube was charged with 0.9 mmol pre-separated imine **7**, 0.9 mmol **8**, 0.3 mmol 4-cyanopyridine **3a**, 0.3 mmol *n*Bu<sub>4</sub>NClO<sub>4</sub>, 0.45 mmol benzoic acid, 2 mL CH<sub>3</sub>CN and 2 mL MeOH, and the suspension was stirred until the solids resolve. Then the assembled electrodes were placed into the solution. The mixture was electrolyzed at a constant current of 5 mA for 3 h. The RVC electrode was ultrasonic washed with ethyl acetate twice and the reaction mixture was concentrated under reduced pressure. Ethyl acetate (30 mL) was added to the residue, washed with saturated sodium bicarbonate (30 mL) to remove benzoic acid, then washed with H<sub>2</sub>O, brine, dried over Na<sub>2</sub>SO<sub>4</sub>, filtered, and concentrated under reduced pressure. The resulting crude product was purified by silica gel column chromatography to afford **9** (38 mg, 34% yield), and the coupled product **4y** (14 mg, 14% yield) was greatly reduced.

#### E4: The radical quenching experiment

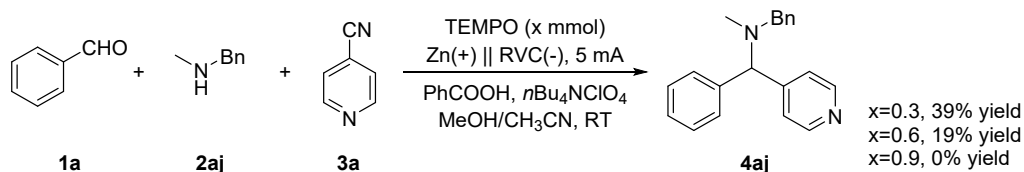

The test cube was charged with 0.9 mmol benzaldehyde **1a**, 0.9 mmol *N*-methylbenzylamine, 0.3 mmol (or 0.6 mmol, or 0.9 mmol) 2,2,6,6-tetramethylpiperidinoxy (TEMPO) respectively, 0.3 mmol 4-cyanopyridine **3a**, 0.3 mmol *n*Bu<sub>4</sub>NClO<sub>4</sub>, 0.45 mmol benzoic acid, 2 mL CH<sub>3</sub>CN and 2 mL MeOH, and the suspension was stirred until the solids resolve. Then the assembled electrodes were placed into the solution. The mixture was electrolyzed at a constant current of 5 mA for 3 h. The RVC electrode was ultrasonic washed with ethyl acetate twice and the reaction mixture was concentrated under reduced pressure. Ethyl acetate (30 mL) was added to the residue, washed with saturated sodium bicarbonate (30 mL) to remove benzoic acid, then washed with H<sub>2</sub>O, brine, dried over Na<sub>2</sub>SO<sub>4</sub>, filtered, and concentrated under reduced pressure. The resulting crude product was purified by silica gel column chromatography to afford **4aj**. The yields of coupling products obtained from the reactions involving 1 equivalent TEMPO, 2 equivalents TEMPO, and 3 equivalents TEMPO were 39%, 19%, and 0%, respectively.



## F: Characterization Data for the Electrolysis Products

### 4a: *N*-benzyl-1-phenyl-1-(pyridin-4-yl)methanamine

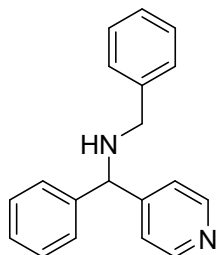

The product was obtained in 81% yield (66.4 mg) with an eluent of PE/EA = 3/1, colorless oil. <sup>1</sup>H NMR (600 MHz, CDCl<sub>3</sub>): δ (ppm) 2.01 (s, 1H), 3.71 (s, 2H), 4.80 (s, 1H), 7.21 – 7.27 (m, 2H), 7.28 – 7.33 (m, 6H), 7.34 – 7.38 (m, 4H), 8.48–8.52 (m, 2H). <sup>13</sup>C NMR (150 MHz, CDCl<sub>3</sub>): δ (ppm) 51.8, 65.6, 122.5, 127.2, 127.4, 127.8, 128.2, 128.6, 128.9, 140.0, 142.5, 150.0, 152.8. HRMS (EI): exact mass calculated for [M]<sup>+</sup> (C<sub>19</sub>H<sub>18</sub>N<sub>2</sub>) requires m/z 274.1470, found m/z 274.1471.

### 4b: *N*-(4-methoxybenzyl)-1-phenyl-1-(pyridin-4-yl)methanamine

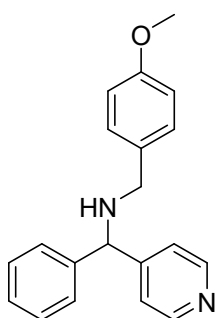

The product was obtained in 79% yield (71.7 mg) with an eluent of PE/EA = 2/1, colorless oil. <sup>1</sup>H NMR (400 MHz, CDCl<sub>3</sub>): δ (ppm) 1.87 (s, 1H), 3.67 (s, 2H), 3.81 (s, 3H), 4.80 (s, 1H), 6.87 (d, *J* = 8.6 Hz, 2H), 7.20 – 7.28 (m, 3H), 7.32 (t, *J* = 7.4 Hz, 2H), 7.35 – 7.41 (m, 4H), 8.46 – 8.58 (m, 2H). <sup>13</sup>C NMR (100 MHz, CDCl<sub>3</sub>): δ (ppm) 51.2, 55.3, 65.4, 113.9, 122.5, 127.4, 127.7, 128.8, 129.4, 131.9, 142.4, 150.0, 152.8, 158.8. HRMS (EI): exact mass calculated for [M]<sup>+</sup> (C<sub>20</sub>H<sub>20</sub>N<sub>2</sub>O) requires m/z 304.1576, found m/z 304.1578.

### 4c: *N*-(4-fluorobenzyl)-1-phenyl-1-(pyridin-4-yl)methanamine

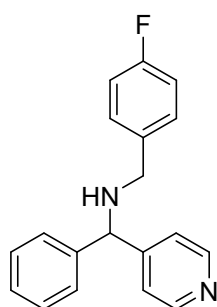

The product was obtained in 75% yield (65.8 mg) with an eluent of PE/EA = 2/1, colorless oil. <sup>1</sup>H NMR (400 MHz, CDCl<sub>3</sub>): δ (ppm) 1.88 (s, 1H), 3.61 (s, 2H), 4.71 (s, 1H), 6.93 (t, *J* = 8.6 Hz, 2H), 7.13 – 7.33 (m, 9H), 8.44 (d, *J* = 5.8 Hz, 2H). <sup>13</sup>C NMR (100 MHz, CDCl<sub>3</sub>): δ (ppm) 51.0, 65.6, 115.3 (d, *J* = 21.2 Hz), 122.4, 127.4, 127.8, 128.9, 129.7 (d, *J* = 8.0 Hz), 135.6 (d, *J* = 3.3 Hz), 142.3, 150.0, 152.6, 162.0 (d, *J* = 245.0 Hz). <sup>19</sup>F NMR (377MHz, CDCl<sub>3</sub>): δ (ppm) -115.6 – -115.5 (m). HRMS (EI): exact mass calculated for [M]<sup>+</sup> (C<sub>19</sub>H<sub>17</sub>FN<sub>2</sub>) requires m/z 292.1376, found m/z 292.1375.

### 4d: *N*-(furan-2-ylmethyl)-1-phenyl-1-(pyridin-4-yl)methanamine

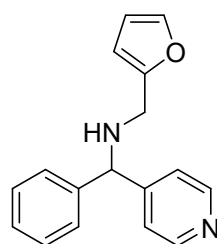

The product was obtained in 67% yield (53.2 mg) with an eluent of PE/EA = 2/1, light yellow oil. <sup>1</sup>H NMR (600 MHz, CDCl<sub>3</sub>): δ (ppm) 2.24 (s, 1H), 3.67 – 3.74 (m, 2H), 4.78 (s, 1H), 6.11 (d, *J* = 3.1 Hz, 1H), 6.28 – 6.33 (m, 1H), 7.21 – 7.24 (m, 1H), 7.29 (t, *J* = 7.6 Hz, 2H), 7.33 – 7.37 (m, 5H), 8.50 (d, *J* = 6.0 Hz, 2H). <sup>13</sup>C NMR (150 MHz, CDCl<sub>3</sub>): δ (ppm) 44.0, 65.0, 107.4, 110.2, 122.5, 127.5, 127.8, 128.8, 142.0, 142.1, 150.0, 152.5, 153.3. HRMS (EI): exact mass calculated for [M]<sup>+</sup> (C<sub>17</sub>H<sub>16</sub>N<sub>2</sub>O) requires m/z 264.1263, found m/z 264.1262.



#### 4e: 1-phenyl-*N*-(phenyl(pyridin-4-yl)methyl)ethan-1-amine

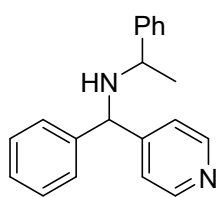

The product was obtained in 54% yield (46.5 mg) with an eluent of PE/EA = 3/1, light yellow oil.  $^1\text{H}$  NMR (400 MHz,  $\text{CDCl}_3$ ):  $\delta$  (ppm) 1.30 (d,  $J = 6.7$  Hz, 3H), 2.04 (s, 1H), 3.55 (q,  $J = 6.7$  Hz, 1H), 4.51 (s, 1H), 7.10 – 7.18 (m, 8H), 7.19 – 7.23 (m, 2H), 7.24 – 7.28 (m, 2H), 8.44 (dd,  $J = 4.5, 1.5$  Hz, 2H).  $^{13}\text{C}$  NMR (100 MHz,  $\text{CDCl}_3$ ):  $\delta$  (ppm) 24.3, 55.6, 61.2, 122.8, 126.6, 127.2, 127.4, 127.6, 128.6, 128.7, 142.9, 144.9, 149.9, 152.7. HRMS (EI): exact mass calculated for  $[\text{M}]^+$  ( $\text{C}_{20}\text{H}_{20}\text{N}_2$ ) requires  $m/z$  288.1626, found  $m/z$  288.1629.

#### 4f: *N*-benzhydryl-1-phenyl-1-(pyridin-4-yl)methanamine

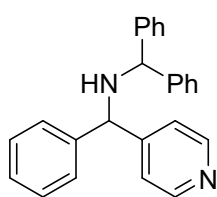

The product was obtained in 72% yield (75.6 mg) with an eluent of PE/EA = 3/1, yellow solid.  $^1\text{H}$  NMR (400 MHz,  $\text{CDCl}_3$ ):  $\delta$  (ppm) 2.23 (s, 1H), 4.68 – 4.72 (m, 2H), 7.18 – 7.24 (m, 2H), 7.25 – 7.37 (m, 15H), 8.48 (d,  $J = 4.9$  Hz, 2H).  $^{13}\text{C}$  NMR (100 MHz,  $\text{CDCl}_3$ ):  $\delta$  (ppm) 62.8, 63.7, 122.7, 127.2, 127.3, 127.5, 127.5, 127.6, 127.7, 128.6, 128.7, 128.8, 142.2, 143.2, 143.4, 150.0, 152.8. HRMS (EI): exact mass calculated for  $[\text{M}]^+$  ( $\text{C}_{25}\text{H}_{22}\text{N}_2$ ) requires  $m/z$  350.1783, found  $m/z$  350.1784.

#### 4g: *N*-(phenyl(pyridin-4-yl)methyl)-2,3-dihydro-1*H*-inden-1-amine

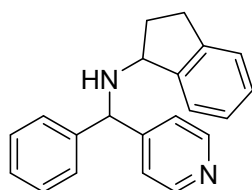

The product was obtained in 51% yield (46.3 mg) with an eluent of PE/EA = 4/1, colorless oil.  $^1\text{H}$  NMR (400 MHz,  $\text{CDCl}_3$ ):  $\delta$  (ppm) 1.68 – 2.05 (m, 2H), 2.43 – 2.59 (m, 1H), 2.76 – 2.87 (m, 1H), 2.97 – 3.10 (m, 1H), 4.21 (t,  $J = 6.9$  Hz, 1H), 5.14 (s, 1H), 7.26 – 7.34 (m, 4H), 7.35 – 7.43 (m, 2H), 7.46 – 7.59 (m, 5H), 8.56 – 8.63 (m, 2H).  $^{13}\text{C}$  NMR (100 MHz,  $\text{CDCl}_3$ ):  $\delta$  (ppm) 30.3, 34.5, 61.1, 64.4, 122.6, 124.2, 124.8, 126.4, 127.4, 127.6, 127.7, 128.9, 142.4, 143.3, 145.5, 150.0, 153.3. HRMS (EI): exact mass calculated for  $[\text{M}]^+$  ( $\text{C}_{21}\text{H}_{20}\text{N}_2$ ) requires  $m/z$  300.1626, found  $m/z$  300.1625.

#### 4h: 4-(2-((phenyl(pyridin-4-yl)methyl)amino)ethyl)phenol

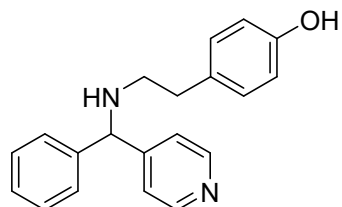

The product was obtained in 64% yield (58.4 mg) with an eluent of PE/EA = 1/2, colorless oil.  $^1\text{H}$  NMR (400 MHz,  $\text{CDCl}_3$ ):  $\delta$  (ppm) 2.70 – 2.85 (m, 4H), 4.78 (s, 1H), 4.78 (s, 1H), 6.76 (d,  $J = 8.3$  Hz, 2H), 7.00 (d,  $J = 8.3$  Hz, 2H), 7.20 – 7.25 (m, 1H), 7.27 – 7.36 (m, 6H), 8.46 (d,  $J = 5.6$  Hz, 2H).  $^{13}\text{C}$  NMR (100 MHz,  $\text{CDCl}_3$ ):  $\delta$  (ppm) 35.4, 49.4, 66.5, 115.6, 122.8, 127.3, 127.7, 128.8, 129.8, 130.8, 142.3, 149.1, 153.9, 155.4. HRMS (EI): exact mass calculated for  $[\text{M}]^+$  ( $\text{C}_{20}\text{H}_{20}\text{N}_2\text{O}$ ) requires  $m/z$  304.1576, found  $m/z$  304.1577.

**4i: 2-(1*H*-indol-3-yl)-*N*-(phenyl(pyridin-4-yl)methyl)ethan-1-amine**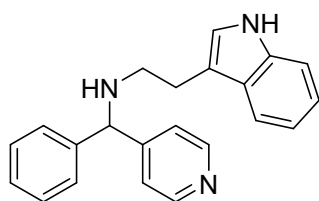

The product was obtained in 68% yield (66.8 mg) with an eluent of PE/EA = 1/2, light yellow oil. <sup>1</sup>H NMR (600 MHz, CDCl<sub>3</sub>): δ (ppm) 2.14 (s, 1H), 2.85 – 2.93 (m, 2H), 2.96 – 3.02 (m, 2H), 4.76 (s, 1H), 6.95 (d, *J* = 1.7 Hz, 1H), 7.08 (t, *J* = 7.6 Hz, 1H), 7.16 (t, *J* = 7.6 Hz, 1H), 7.18 – 7.22 (m, 1H), 7.24 – 7.31 (m, 7H), 7.56 (d, *J* = 7.9 Hz, 1H), 8.44 (d, *J* = 5.8 Hz, 2H), 8.52 (s, 1H). <sup>13</sup>C NMR (150 MHz, CDCl<sub>3</sub>): δ (ppm) 25.9, 48.1, 66.6, 111.3, 113.6, 118.9, 119.2, 122.0, 122.2, 122.5, 127.3, 127.4, 127.6, 128.8, 136.5, 142.7, 149.8, 153.3. HRMS (EI): exact mass calculated for [M]<sup>+</sup> (C<sub>22</sub>H<sub>21</sub>N<sub>3</sub>) requires *m/z* 327.1735, found *m/z* 327.1736.

**4j: *N*-(phenyl(pyridin-4-yl)methyl)butan-1-amine**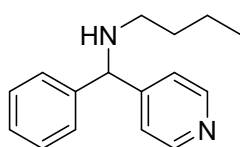

The product was obtained in 76% yield (54.8 mg) with an eluent of PE/EA = 2/1, light yellow oil. <sup>1</sup>H NMR (400 MHz, CDCl<sub>3</sub>): δ (ppm) 0.89 (t, *J* = 7.3 Hz, 3H), 1.30 – 1.40 (m, 2H), 1.44 – 1.55 (m, 2H), 2.26 (s, 1H), 2.48 – 2.63 (m, 2H), 4.77 (s, 1H), 7.20 – 7.37 (m, 7H), 8.50 (dd, *J* = 4.6, 1.4 Hz, 2H). <sup>13</sup>C NMR (100 MHz, CDCl<sub>3</sub>): δ (ppm) 14.0, 20.4, 32.3, 48.0, 66.9, 122.5, 127.3, 127.6, 128.7, 142.9, 149.8, 153.3. HRMS (EI): exact mass calculated for [M]<sup>+</sup> (C<sub>16</sub>H<sub>20</sub>N<sub>2</sub>) requires *m/z* 240.1626, found *m/z* 240.1629.

**4k: 2,2-dimethyl-*N*-(phenyl(pyridin-4-yl)methyl)propan-1-amine**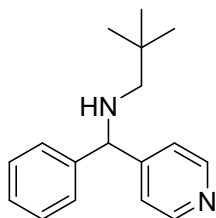

The product was obtained in 80% yield (61.2 mg) with an eluent of PE/EA = 3/1, colorless oil. <sup>1</sup>H NMR (400 MHz, CDCl<sub>3</sub>): δ (ppm) 0.93 (s, 9H), 2.25 (d, *J* = 11.2 Hz, 1H), 2.34 (d, *J* = 11.2 Hz, 1H), 4.72 (s, 1H), 7.25 (m, 1H), 7.31 (t, *J* = 7.4 Hz, 2H), 7.34 – 7.40 (m, 4H), 8.50 (d, *J* = 3.8 Hz, 2H). <sup>13</sup>C NMR (100 MHz, CDCl<sub>3</sub>): δ (ppm) 27.8, 31.6, 60.3, 67.3, 122.5, 127.3, 127.6, 128.7, 143.2, 149.8, 153.5. HRMS (EI): exact mass calculated for [M]<sup>+</sup> (C<sub>17</sub>H<sub>22</sub>N<sub>2</sub>) requires *m/z* 254.1783, found *m/z* 254.1781.

**4l: *N*-(phenyl(pyridin-4-yl)methyl)cyclopropanamine**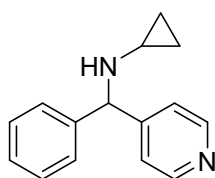

The product was obtained in 87% yield (58.7 mg) with an eluent of PE/EA = 2/1, light yellow oil. <sup>1</sup>H NMR (400 MHz, CDCl<sub>3</sub>): δ (ppm) 0.35 – 0.44 (m, 4H), 2.01 – 2.11 (m, 1H), 2.36 (s, 1H), 4.87 (s, 1H), 7.21 – 7.27 (m, 1H), 7.28 – 7.34 (m, 6H), 8.50 (dd, *J* = 4.6, 1.4 Hz, 2H). <sup>13</sup>C NMR (100 MHz, CDCl<sub>3</sub>): δ (ppm) 6.6, 6.8, 29.5, 66.5, 122.7, 127.4, 127.5, 128.7, 142.7, 149.7, 153.1. HRMS (EI): exact mass calculated for [M]<sup>+</sup> (C<sub>15</sub>H<sub>16</sub>N<sub>2</sub>) requires *m/z* 224.1313, found *m/z* 224.1315.

#### 4m: *N*-(phenyl(pyridin-4-yl)methyl)cyclohexanamine

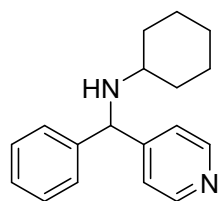

The product was obtained in 66% yield (52.9 mg) with an eluent of PE/EA = 3/1, pale yellow solid. <sup>1</sup>H NMR (400 MHz, CDCl<sub>3</sub>): δ (ppm) 1.02 – 1.20 (m, 5H) 1.51 – 1.60 (m, 1H), 1.65 – 1.74 (m, 2H), 1.87 – 1.98 (m, 2H), 2.31 – 2.42 (m, 1H), 4.99 (s, 1H), 7.20 – 7.26 (m, 1H), 7.26 – 7.36 (m, 6H), 8.50 (d, *J* = 6.0 Hz, 2H). <sup>13</sup>C NMR (100 MHz, CDCl<sub>3</sub>): δ (ppm) 25.1, 26.1, 33.9, 54.2, 63.0, 122.6, 127.4, 127.5, 128.7, 143.3, 149.8, 153.7. HRMS (EI): exact mass calculated for [M]<sup>+</sup> (C<sub>18</sub>H<sub>22</sub>N<sub>2</sub>) requires *m/z* 266.1783, found *m/z* 266.1781.

#### 4n: 2,4,4-trimethyl-*N*-(phenyl(pyridin-4-yl)methyl)pentan-2-amine

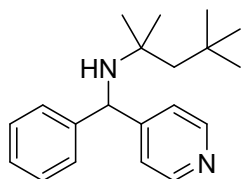

The product was obtained in 87% yield (77.5 mg) with an eluent of PE/EA = 2/1, light yellow oil. <sup>1</sup>H NMR (400 MHz, CDCl<sub>3</sub>): δ (ppm) 1.01 (s, 9H), 1.04 (s, 3H), 1.09 (s, 3H), 1.47 (s, 2H), 4.98 (s, 1H), 7.16 – 7.22 (m, 1H), 7.24 – 7.33 (m, 4H), 7.41 (d, *J* = 5.9 Hz, 2H), 8.48 (d, *J* = 5.9 Hz, 2H). <sup>13</sup>C NMR (100 MHz, CDCl<sub>3</sub>): δ (ppm) 29.4, 31.8, 32.0, 55.9, 56.1, 60.6, 122.6, 127.1, 127.3, 128.8, 145.4, 149.7, 156.1. HRMS (EI): exact mass calculated for [M]<sup>+</sup> (C<sub>20</sub>H<sub>28</sub>N<sub>2</sub>) requires *m/z* 296.2252, found *m/z* 296.2253.

#### 4o: *N*-(phenyl(pyridin-4-yl)methyl)adamantan-1-amine

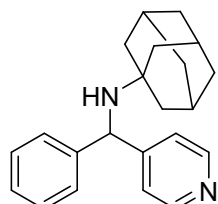

The product was obtained in 55% yield (52.3 mg) with an eluent of PE/EA = 4/1, white solid. <sup>1</sup>H NMR (400 MHz, CDCl<sub>3</sub>): δ (ppm) 1.51 – 1.58 (m, 6H), 1.60 – 1.68 (m, 7H), 1.98 – 2.04 (m, 3H), 5.11 (s, 1H), 7.18 – 7.24 (m, 1H), 7.27 – 7.30 (m, 4H), 7.42 (d, *J* = 5.7 Hz, 2H), 8.49 (d, *J* = 5.7 Hz, 2H). <sup>13</sup>C NMR (100 MHz, CDCl<sub>3</sub>): δ (ppm) 29.6, 36.6, 43.8, 52.1, 58.5, 122.8, 127.1, 127.5, 128.7, 145.2, 149.6, 155.9. HRMS (EI): exact mass calculated for [M]<sup>+</sup> (C<sub>22</sub>H<sub>26</sub>N<sub>2</sub>) requires *m/z* 318.2096, found *m/z* 318.2098.

#### 4p: *N*-(phenyl(pyridin-4-yl)methyl)prop-2-en-1-amine

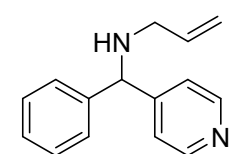

The product was obtained in 66% yield (44.5 mg) with an eluent of PE/EA = 2/1, colorless oil. <sup>1</sup>H NMR (400 MHz, CDCl<sub>3</sub>): δ (ppm) 3.17 – 3.20 (m, 2H), 4.83 (s, 1H), 5.10 – 5.13 (m, 1H), 5.15 – 5.19 (m, 1H), 5.87 – 5.95 (m, 1H), 7.21 – 7.25 (m, 1H), 7.28 – 7.32 (m, 2H), 7.33 – 7.36 (m, 4H), 8.50 (d, *J* = 6.0 Hz, 2H). <sup>13</sup>C NMR (150 MHz, CDCl<sub>3</sub>): δ (ppm) 50.3, 65.6, 116.3, 122.4, 127.4, 127.7, 128.8, 136.3, 142.5, 150.0, 152.8. HRMS (EI): exact mass calculated for [M]<sup>+</sup> (C<sub>15</sub>H<sub>16</sub>N<sub>2</sub>) requires *m/z* 224.1313, found *m/z* 224.1311.

#### 4q: *N*-(phenyl(pyridin-4-yl)methyl)prop-2-yn-1-amine

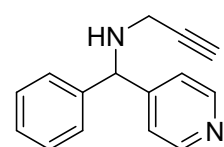

The product was obtained in 76% yield (50.7 mg) with an eluent of PE/EA = 3/2, colorless oil. <sup>1</sup>H NMR (400 MHz, CDCl<sub>3</sub>): δ (ppm) 2.22 (s, 1H), 2.28 (t, *J* = 2.3 Hz, 1H), 3.30 – 3.40 (m, 2H), 5.09 (s, 1H), 7.22 – 7.28 (m, 1H),

7.29 – 7.35 (m, 2H), 7.36 – 7.41 (m, 4H), 8.52 (d,  $J = 5.9$  Hz, 2H).  $^{13}\text{C}$  NMR (100 MHz,  $\text{CDCl}_3$ ):  $\delta$  (ppm) 36.1, 64.3, 72.1, 81.6, 122.5, 127.5, 127.9, 128.9, 141.6, 150.0, 152.0. HRMS (EI): exact mass calculated for  $[\text{M}]^+$  ( $\text{C}_{15}\text{H}_{14}\text{N}_2$ ) requires  $m/z$  222.1157, found  $m/z$  222.1158.

#### 4r: 2,2,2-trifluoro-*N*-(phenyl(pyridin-4-yl)methyl)ethan-1-amine

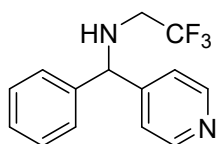

The product was obtained in 67% yield (53.5 mg) with an eluent of PE/EA = 2/1, colorless oil.  $^1\text{H}$  NMR (400 MHz,  $\text{CDCl}_3$ ):  $\delta$  (ppm) 1.89 (s, 1H), 3.01 – 3.15 (m, 2H), 4.89 (s, 1H), 7.18 – 7.23 (m, 1H), 7.24 – 7.32 (m, 6H), 8.47 (dd,  $J = 4.6, 1.5$  Hz, 2H).  $^{13}\text{C}$  NMR (100 MHz,  $\text{CDCl}_3$ ):  $\delta$  (ppm) 48.2 (q,  $J = 31.4$  Hz), 65.2, 122.2, 125.5 (q,  $J = 279.1$  Hz), 127.3, 128.2, 129.0, 141.2, 150.1, 151.6.  $^{19}\text{F}$  NMR (377 MHz,  $\text{CDCl}_3$ ):  $\delta$  (ppm) -71.2. HRMS (EI): exact mass calculated for  $[\text{M}]^+$  ( $\text{C}_{14}\text{H}_{13}\text{F}_3\text{N}_2$ ) requires  $m/z$  266.1031, found  $m/z$  266.1030.

#### 4s: 2-chloro-*N*-(phenyl(pyridin-4-yl)methyl)ethan-1-amine

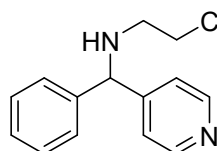

The product was obtained in 76% yield (56.0 mg) with an eluent of PE/EA = 3/2, light red oil.  $^1\text{H}$  NMR (600 MHz,  $\text{CDCl}_3$ ):  $\delta$  (ppm) 2.86 – 2.94 (m, 2H), 3.66 (t,  $J = 5.6$  Hz, 2H), 4.82 (s, 1H), 7.22 – 7.26 (m, 1H), 7.29 – 7.33 (m, 2H), 7.35 – 7.39 (m, 4H), 8.51 (d,  $J = 6.0$  Hz, 2H).  $^{13}\text{C}$  NMR (150 MHz,  $\text{CDCl}_3$ ):  $\delta$  (ppm) 44.8, 48.9, 65.8, 122.3, 127.3, 127.9, 128.9, 142.1, 150.0, 152.5. HRMS (EI): exact mass calculated for  $[\text{M}]^+$  ( $\text{C}_{14}\text{H}_{15}\text{ClN}_2$ ) requires  $m/z$  246.0924, found  $m/z$  246.0926.

#### 4t: *N*-(phenyl(pyridin-4-yl)methyl)-3-(triethoxysilyl)propan-1-amine

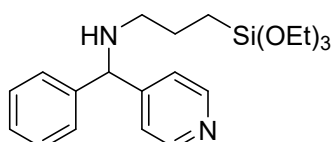

The product was obtained in 48% yield (56.1 mg) with an eluent of PE/EA = 3/1, colorless oil.  $^1\text{H}$  NMR (600 MHz,  $\text{CDCl}_3$ ):  $\delta$  (ppm) 0.62 – 0.68 (m, 2H), 1.21 (t,  $J = 7.0$  Hz, 9H), 1.60 – 1.68 (m, 2H), 1.90 (s, 1H), 2.52 – 2.62 (m, 2H), 3.80 (q,  $J = 7.0$  Hz, 6H), 4.78 (s, 1H), 7.21 – 7.25 (m, 1H), 7.28 – 7.32 (m, 2H), 7.33 – 7.37 (m, 4H), 8.50 (dd,  $J = 4.6, 1.4$  Hz, 2H).  $^{13}\text{C}$  NMR (150 MHz,  $\text{CDCl}_3$ ):  $\delta$  (ppm) 8.0, 18.3, 23.4, 50.8, 58.4, 66.6, 122.4, 127.3, 127.6, 128.7, 142.3, 149.9, 153.2. HRMS (EI): exact mass calculated for  $[\text{M}]^+$  ( $\text{C}_{21}\text{H}_{32}\text{N}_2\text{O}_3\text{Si}$ ) requires  $m/z$  388.2182, found  $m/z$  388.2183.

#### 4u: *N*-(phenyl(pyridin-4-yl)methyl)aniline

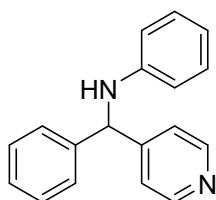

The product was obtained in 71% yield (55.6 mg) with an eluent of PE/EA = 3/1, colorless oil.  $^1\text{H}$  NMR (400 MHz,  $\text{CDCl}_3$ ):  $\delta$  (ppm) 4.29 (s, 1H), 5.44 (d,  $J = 3.2$  Hz, 1H), 6.51 (d,  $J = 8.0$  Hz, 2H), 6.72 (t,  $J = 7.3$  Hz, 1H), 7.12 (t,  $J = 8.0$  Hz, 2H), 7.25 – 7.37 (m, 7H), 8.52 (d,  $J = 5.1$  Hz, 2H).  $^{13}\text{C}$  NMR (100 MHz,  $\text{CDCl}_3$ ):  $\delta$  (ppm) 63.4, 113.6, 118.3, 122.4, 127.7, 128.2, 129.1, 129.3, 141.6, 146.8, 150.2, 151.8. HRMS (EI): exact mass calculated for  $[\text{M}]^+$  ( $\text{C}_{18}\text{H}_{16}\text{N}_2$ ) requires  $m/z$  260.1313, found  $m/z$  260.1314.

#### 4v: 2-fluoro-*N*-(phenyl(pyridin-4-yl)methyl)aniline

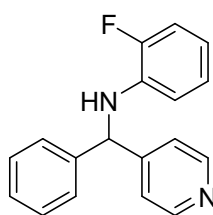

The product was obtained in 57% yield (47.7 mg) with an eluent of PE/EA = 3/1, colorless oil.  $^1\text{H}$  NMR (400 MHz,  $\text{CDCl}_3$ ):  $\delta$  (ppm) 4.50 (s, 1H), 5.47 (d,  $J = 4.2$  Hz, 1H), 6.38 – 6.44 (m, 1H), 6.61 – 6.68 (m, 1H), 6.86 (t,  $J = 7.7$  Hz, 1H), 6.96 – 7.02 (m, 1H), 7.27 – 7.39 (m, 7H), 8.55 (d,  $J = 5.9$  Hz, 2H).  $^{13}\text{C}$  NMR (150 MHz,  $\text{CDCl}_3$ ):  $\delta$  (ppm) 62.0, 113.3 (d,  $J = 2.5$  Hz), 114.6 (d,  $J = 18.1$  Hz), 117.8 (d,  $J = 6.9$  Hz), 122.3, 124.6 (d,  $J = 2.9$  Hz), 127.6, 128.3, 129.2, 135.3 (d,  $J = 11.6$  Hz), 141.1, 150.3, 151.3, 151.6 (d,  $J = 239.4$  Hz).  $^{19}\text{F}$  NMR (377 MHz,  $\text{CDCl}_3$ ):  $\delta$  (ppm) -135.5 – -135.4 (m). HRMS (EI): exact mass calculated for  $[\text{M}]^+$  ( $\text{C}_{18}\text{H}_{15}\text{FN}_2$ ) requires  $m/z$  278.1219, found  $m/z$  278.1221.

#### 4w: 3-chloro-*N*-(phenyl(pyridin-4-yl)methyl)aniline

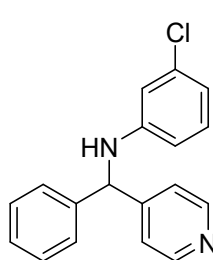

The product was obtained in 51% yield (44.8 mg) with an eluent of PE/EA = 3/1, colorless oil.  $^1\text{H}$  NMR (400 MHz,  $\text{CDCl}_3$ ):  $\delta$  (ppm) 4.39 (d,  $J = 3.9$  Hz, 1H), 5.44 (d,  $J = 4.2$  Hz, 1H), 6.38 (dd,  $J = 8.2, 1.9$  Hz, 1H), 6.50 (t,  $J = 1.9$  Hz, 1H), 6.69 (dd,  $J = 7.9, 1.1$  Hz, 1H), 7.02 (t,  $J = 8.1$  Hz, 1H), 7.23 – 7.38 (m, 7H), 8.54 (d,  $J = 5.8$  Hz, 2H).  $^{13}\text{C}$  NMR (100 MHz,  $\text{CDCl}_3$ ):  $\delta$  (ppm) 62.1, 111.7, 113.4, 118.3, 122.3, 127.7, 128.3, 129.2, 130.3, 135.0, 141.0, 147.9, 150.3, 151.1. HRMS (EI): exact mass calculated for  $[\text{M}]^+$  ( $\text{C}_{18}\text{H}_{15}\text{ClN}_2$ ) requires  $m/z$  294.0924, found  $m/z$  294.0925.

#### 4x: 3,5-dimethoxy-*N*-(phenyl(pyridin-4-yl)methyl)aniline

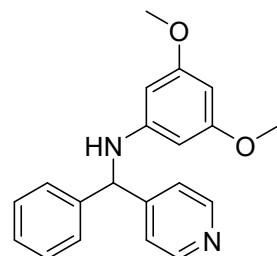

The product was obtained in 58% yield (55.9 mg) with an eluent of PE/EA = 2/1, light yellow oil.  $^1\text{H}$  NMR (600 MHz,  $\text{CDCl}_3$ ):  $\delta$  (ppm) 3.68 (s, 6H), 4.25 (d,  $J = 3.6$  Hz, 1H), 5.45 (d,  $J = 3.6$  Hz, 1H), 5.71 (d,  $J = 2.0$  Hz, 2H), 5.90 (t,  $J = 2.0$  Hz, 1H), 7.27 – 7.36 (m, 7H), 8.55 (d,  $J = 6.0$  Hz, 2H).  $^{13}\text{C}$  NMR (150 MHz,  $\text{CDCl}_3$ ):  $\delta$  (ppm) 55.1, 62.3, 90.4, 92.6, 122.3, 127.7, 128.2, 129.1, 141.4, 148.7, 150.2, 151.6, 161.6. HRMS (EI): exact mass calculated for  $[\text{M}]^+$  ( $\text{C}_{20}\text{H}_{20}\text{N}_2\text{O}_2$ ) requires  $m/z$  320.1525, found  $m/z$  320.1526.

#### 4y: 4-bromo-*N*-(phenyl(pyridin-4-yl)methyl)aniline

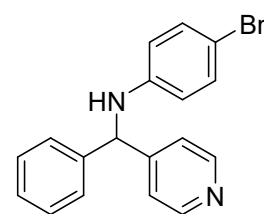

The product was obtained in 63% yield (64.0 mg) with an eluent of PE/EA = 3/1, colorless oil.  $^1\text{H}$  NMR (400 MHz,  $\text{CDCl}_3$ ):  $\delta$  (ppm) 4.36 (s, 1H), 5.40 (d,  $J = 3.4$  Hz, 1H), 6.33 – 6.45 (m, 2H), 7.14 – 7.22 (m, 2H), 7.25 – 7.38 (m, 7H), 8.51 (s, 2H).  $^{13}\text{C}$  NMR (100 MHz,  $\text{CDCl}_3$ ):  $\delta$  (ppm) 62.3, 110.0, 115.2, 122.3, 127.7, 128.3, 129.2, 132.0, 141.1, 145.7, 150.2, 151.2. HRMS (EI): exact mass calculated for  $[\text{M}]^+$  ( $\text{C}_{18}\text{H}_{15}\text{BrN}_2$ ) requires  $m/z$  338.0419, found  $m/z$  338.0418.

**4z: 4-iodo-*N*-(phenyl(pyridin-4-yl)methyl)aniline**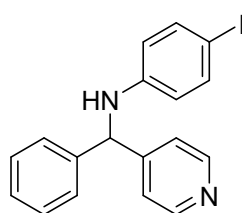

The product was obtained in 52% yield (60.1 mg) with an eluent of PE/EA = 2/1, colorless oil. <sup>1</sup>H NMR (400 MHz, CDCl<sub>3</sub>): δ (ppm) 4.35 (d, *J* = 3.7 Hz, 1H), 5.40 (d, *J* = 4.0 Hz, 1H), 6.30 (d, *J* = 8.7 Hz, 2H), 7.24 – 7.39 (m, 9H), 8.53 (d, *J* = 5.9 Hz, 2H). <sup>13</sup>C NMR (100 MHz, CDCl<sub>3</sub>): δ (ppm) 62.1, 79.3, 115.8, 122.3, 127.7, 128.3, 129.2, 137.9, 141.0, 146.3, 150.3, 151.1. HRMS (EI): exact mass calculated for [M]<sup>+</sup> (C<sub>18</sub>H<sub>15</sub>IN<sub>2</sub>) requires *m/z* 386.0280, found *m/z* 386.0282.

**4aa: *N*-(phenyl(pyridin-4-yl)methyl)-4-(trifluoromethyl)aniline**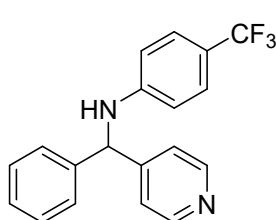

The product was obtained in 45% yield (44.1 mg) with an eluent of PE/EA = 2/1, colorless oil. <sup>1</sup>H NMR (400 MHz, CDCl<sub>3</sub>): δ (ppm) 4.64 (d, *J* = 4.2 Hz, 1H), 5.41 (d, *J* = 4.2 Hz, 1H), 6.45 (d, *J* = 8.5 Hz, 2H), 7.16 – 7.21 (m, 4H), 7.22 – 7.30 (m, 5H), 8.44 (d, *J* = 6.0 Hz, 2H). <sup>13</sup>C NMR (100 MHz, CDCl<sub>3</sub>): δ (ppm) 61.9, 112.8, 119.9 (q, *J* = 32.7 Hz), 122.3, 124.8 (q, *J* = 270.6 Hz), 126.6 (q, *J* = 3.7 Hz), 127.7, 128.4, 129.3, 140.7, 149.2, 150.3, 150.8. <sup>19</sup>F NMR (377 MHz, CDCl<sub>3</sub>): δ (ppm) -61.1. HRMS (EI): exact mass calculated for [M]<sup>+</sup> (C<sub>19</sub>H<sub>15</sub>F<sub>3</sub>N<sub>2</sub>) requires *m/z* 328.1187, found *m/z* 328.1185.

**4ab: 1-(4-((phenyl(pyridin-4-yl)methyl)amino)phenyl)ethan-1-one**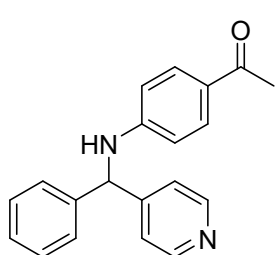

The product was obtained in 44% yield (40.1 mg) with an eluent of PE/EA = 2/1, colorless oil. <sup>1</sup>H NMR (400 MHz, CDCl<sub>3</sub>): δ (ppm) 2.46 (s, 3H), 4.94 (d, *J* = 4.6 Hz, 1H), 5.57 (d, *J* = 4.7 Hz, 1H), 6.52 (d, *J* = 8.7 Hz, 2H), 7.26 – 7.30 (m, 4H), 7.31 – 7.38 (m, 3H), 7.77 (d, *J* = 8.7 Hz, 2H), 8.54 (d, *J* = 5.3 Hz, 2H). <sup>13</sup>C NMR (150 MHz, CDCl<sub>3</sub>): δ (ppm) 25.1, 60.6, 111.4, 121.2, 126.6, 126.7, 127.4, 128.2, 129.6, 139.4, 149.2, 149.5, 149.6, 195.4. HRMS (EI): exact mass calculated for [M]<sup>+</sup> (C<sub>20</sub>H<sub>18</sub>N<sub>2</sub>O) requires *m/z* 302.1419, found *m/z* 302.1420.

**4ac:*****N*-(phenyl(pyridin-4-yl)methyl)-4-(4,4,5,5-tetramethyl-1,3,2-dioxaborolan-2-yl)aniline**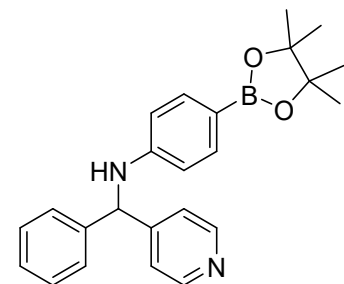

The product was obtained in 48% yield (55.9 mg) with an eluent of PE/EA = 5/2, colorless solid. <sup>1</sup>H NMR (600 MHz, CDCl<sub>3</sub>): δ (ppm) 1.29 (s, 12H), 4.46 (d, *J* = 4.3 Hz, 1H), 5.52 (d, *J* = 4.3 Hz, 1H), 6.50 (d, *J* = 8.5 Hz, 2H), 7.25 – 7.31 (m, 5H), 7.33 (m, 2H), 7.60 (d, *J* = 8.5 Hz, 2H), 8.53 (dd, *J* = 4.5, 1.5 Hz, 2H). <sup>13</sup>C NMR (150 MHz, CDCl<sub>3</sub>): δ (ppm) 24.8, 61.7, 83.3, 112.7, 122.4, 127.7, 128.2, 129.1, 136.3, 141.2, 149.2, 150.2, 151.3. HRMS (EI): exact mass calculated for [M]<sup>+</sup> (C<sub>24</sub>H<sub>27</sub>BN<sub>2</sub>O<sub>2</sub>) requires *m/z* 386.2166, found *m/z* 386.2167.

**4ad: 4-((phenyl(pyridin-4-yl)methyl)amino)phenol**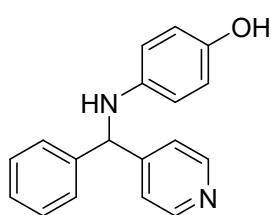

The product was obtained in 52% yield (42.7 mg) with an eluent of PE/EA = 2/1, colorless solid. <sup>1</sup>H NMR (400 MHz, d6-DMSO): δ (ppm) 5.55 (d, *J* = 7.4 Hz, 1H), 5.93 (d, *J* = 7.4 Hz, 1H), 6.46 – 6.55 (m, 4H), 7.22 (t, *J* = 7.3 Hz, 1H), 7.32 (d, *J* = 7.5 Hz, 2H), 7.39 – 7.45 (m, 4H), 8.44 – 8.52 (m, 3H). <sup>13</sup>C NMR (100 MHz, d6-DMSO): δ (ppm) 61.3, 115.3, 115.9, 122.9, 127.6, 127.9, 129.0, 140.7, 143.1, 149.3, 150.1, 153.2. HRMS (EI): exact mass calculated for [M]<sup>+</sup> (C<sub>18</sub>H<sub>16</sub>N<sub>2</sub>O) requires *m/z* 276.1263, found *m/z* 276.1265.

**4ae: *N,N*-dimethyl-*N*'-(phenyl(pyridin-4-yl)methyl)benzene-1,4-diamine**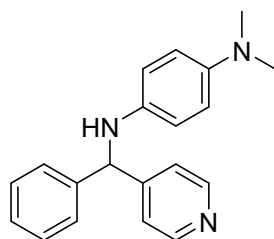

The product was obtained in 47% yield (43.0 mg) with an eluent of PE/EA = 2/1, colorless oil. <sup>1</sup>H NMR (600 MHz, CDCl<sub>3</sub>): δ (ppm) 2.79 (s, 6H), 3.91 (s, 1H), 5.36 (s, 1H), 6.49 (d, *J* = 8.9 Hz, 2H), 6.64 – 6.68 (m, 2H), 7.27 – 7.35 (m, 7H), 8.53 (dd, *J* = 4.5, 1.6 Hz, 2H). <sup>13</sup>C NMR (150 MHz, CDCl<sub>3</sub>): δ (ppm) 42.0, 63.3, 115.0, 115.5, 122.4, 127.7, 128.0, 129.0, 139.2, 142.1, 144.5, 150.1, 150.4. HRMS (EI): exact mass calculated for [M]<sup>+</sup> (C<sub>20</sub>H<sub>21</sub>N<sub>3</sub>) requires *m/z* 303.1735, found *m/z* 303.1738.

**4af: *N*-(phenyl(pyridin-4-yl)methyl)naphthalen-2-amine**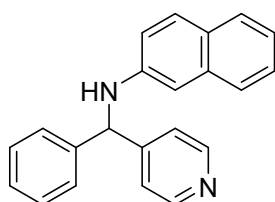

The product was obtained in 61% yield (57.0 mg) with an eluent of PE/EA = 2/1, white solid. <sup>1</sup>H NMR (400 MHz, CDCl<sub>3</sub>): δ (ppm) 4.43 (s, 1H), 5.60 (d, *J* = 2.7 Hz, 1H), 6.60 (d, *J* = 1.9 Hz, 1H), 6.92 (dd, *J* = 8.8, 2.3 Hz, 1H), 7.21 (t, *J* = 7.4 Hz, 1H), 7.30 – 7.41 (m, 8H), 7.48 (d, *J* = 8.4 Hz, 1H), 7.66 (t, *J* = 9.1 Hz, 2H), 8.57 (d, *J* = 5.6 Hz, 2H). <sup>13</sup>C NMR (100 MHz, CDCl<sub>3</sub>): δ (ppm) 62.4, 106.1, 117.9, 122.5, 122.6, 126.2, 126.5, 127.6, 127.7, 127.8, 128.3, 129.1, 129.2, 134.8, 141.4, 144.3, 150.0, 151.8. HRMS (EI): exact mass calculated for [M]<sup>+</sup> (C<sub>22</sub>H<sub>18</sub>N<sub>2</sub>) requires *m/z* 310.1470, found *m/z* 310.1472.

**4ag: *N*-(phenyl(pyridin-4-yl)methyl)-1*H*-indol-5-amine**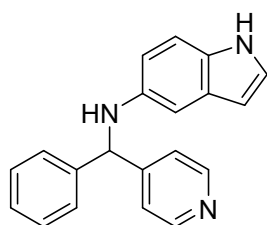

The product was obtained in 60% yield (53.7 mg) with an eluent of PE/EA = 2/1, yellow solid. <sup>1</sup>H NMR (600 MHz, CDCl<sub>3</sub>): δ (ppm) 4.05 (s, 1H), 5.47 (s, 1H), 6.28 – 6.32 (m, 1H), 6.59 (dd, *J* = 8.6, 2.0 Hz, 1H), 6.63 (d, *J* = 2.0 Hz, 1H), 7.09 (t, *J* = 2.8 Hz, 1H), 7.18 (d, *J* = 8.6 Hz, 1H), 7.27 – 7.31 (m, 1H), 7.32 – 7.36 (m, 4H), 7.39 (d, *J* = 5.9 Hz, 2H), 8.11 (s, 1H), 8.54 (dd, *J* = 4.6, 1.4 Hz, 2H). <sup>13</sup>C NMR (150 MHz, CDCl<sub>3</sub>): δ (ppm) 63.5, 101.9, 103.1, 111.7, 112.2, 122.5, 124.7, 127.8, 128.0, 128.6, 129.0, 130.3, 141.0, 142.3, 150.0, 152.6. HRMS (EI): exact mass calculated for [M]<sup>+</sup> (C<sub>20</sub>H<sub>17</sub>N<sub>3</sub>) requires *m/z* 299.1422, found *m/z* 299.1424.

**4ah: N-(phenyl(pyridin-4-yl)methyl)quinolin-5-amine**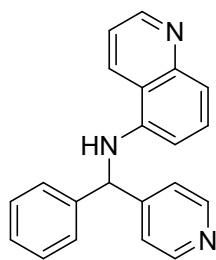

The product was obtained in 60% yield (55.9 mg) with an eluent of PE/EA = 1/1, yellow solid. <sup>1</sup>H NMR (400 MHz, CDCl<sub>3</sub>): δ (ppm) 4.91 (d, *J* = 2.7 Hz, 1H), 5.65 (d, *J* = 3.1 Hz, 1H), 6.41 (d, *J* = 7.6 Hz, 1H), 7.34 – 7.41 (m, 8H), 7.44 (t, *J* = 8.1 Hz, 1H), 7.55 (d, *J* = 8.4 Hz, 1H), 8.27 (d, *J* = 8.4 Hz, 1H), 8.56 (d, *J* = 5.6 Hz, 2H), 8.89 (dd, *J* = 4.2, 1.5 Hz, 1H). <sup>13</sup>C NMR (100 MHz, CDCl<sub>3</sub>): δ (ppm) 62.6, 107.2, 118.8, 119.5, 119.8, 122.4, 127.9, 128.6, 129.3, 129.4, 130.5, 141.1, 141.9, 148.7, 149.9, 150.4, 151.1. HRMS (EI): exact mass calculated for [M]<sup>+</sup> (C<sub>21</sub>H<sub>17</sub>N<sub>3</sub>) requires *m/z* 311.1422, found *m/z* 311.1423.

**4ai: N-ethyl-N-(phenyl(pyridin-4-yl)methyl)ethanamine**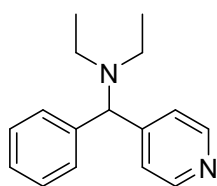

The product was obtained in 70% yield (50.2 mg) with an eluent of PE/EA = 2/1, colorless oil. <sup>1</sup>H NMR (600 MHz, CDCl<sub>3</sub>): δ (ppm) 0.98 (t, *J* = 7.1 Hz, 6H), 2.47 – 2.60 (m, 4H), 4.71 (s, 1H), 7.18 – 7.23 (m, 1H), 7.27 (t, *J* = 7.6 Hz, 2H), 7.33 – 7.38 (m, 4H), 8.47 (dd, *J* = 4.7, 1.3 Hz, 2H). <sup>13</sup>C NMR (100 MHz, CDCl<sub>3</sub>): δ (ppm) 11.2, 42.9, 70.4, 123.2, 127.4, 128.4, 128.5, 141.2, 149.7, 152.9. HRMS (EI): exact mass calculated for [M]<sup>+</sup> (C<sub>16</sub>H<sub>20</sub>N<sub>2</sub>) requires *m/z* 240.1626, found *m/z* 240.1627.

**4aj: N-benzyl-N-methyl-1-phenyl-1-(pyridin-4-yl)methanamine**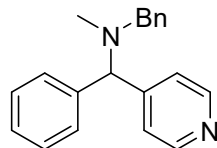

The product was obtained in 81% yield (69.8 mg) with an eluent of PE/EA = 4/1, colorless oil. <sup>1</sup>H NMR (400 MHz, CDCl<sub>3</sub>): δ (ppm) 2.07 (s, 3H), 3.44 (d, *J* = 13.5 Hz, 1H), 3.53 (d, *J* = 13.5 Hz, 1H), 4.48 (s, 1H), 7.20 – 7.27 (m, 2H), 7.28 – 7.35 (m, 4H), 7.36 – 7.43 (m, 4H), 7.45 (d, *J* = 6.0 Hz, 2H), 8.52 (d, *J* = 6.0 Hz, 2H). <sup>13</sup>C NMR (100 MHz, CDCl<sub>3</sub>): δ (ppm) 40.1, 59.6, 74.1, 123.2, 127.1, 127.7, 128.3, 128.4, 128.6, 128.8, 139.2, 140.7, 149.8, 152.3. HRMS (EI): exact mass calculated for [M]<sup>+</sup> (C<sub>20</sub>H<sub>20</sub>N<sub>2</sub>) requires *m/z* 288.1626, found *m/z* 288.1623.

**4ak: N,N-dibenzyl-1-phenyl-1-(pyridin-4-yl)methanamine**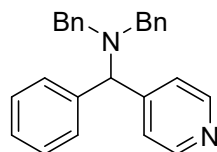

The product was obtained in 59% yield (64.4 mg) with an eluent of PE/EA = 2/1, yellow solid. <sup>1</sup>H NMR (400 MHz, CDCl<sub>3</sub>): δ (ppm) 3.39 (d, *J* = 14.1 Hz, 2H), 3.61 (d, *J* = 14.1 Hz, 2H), 4.91 (s, 1H), 7.16 – 7.23 (m, 2H), 7.24 – 7.32 (m, 8H), 7.33 – 7.39 (m, 7H), 8.50 (d, *J* = 5.2 Hz, 2H). <sup>13</sup>C NMR (100 MHz, CDCl<sub>3</sub>): δ (ppm) 53.9, 66.4, 124.2, 127.3, 127.7, 128.4, 128.5, 128.6, 129.6, 137.6, 138.9, 149.7, 150.4. HRMS (EI): exact mass calculated for [M]<sup>+</sup> (C<sub>26</sub>H<sub>24</sub>N<sub>2</sub>) requires *m/z* 364.1939, found *m/z* 364.1941.



**4al: N-methyl-N-(naphthalen-1-ylmethyl)-1-phenyl-1-(pyridin-4-yl)methanamine**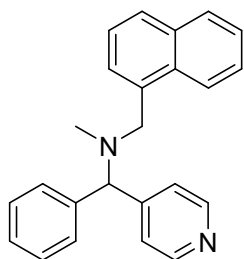

The product was obtained in 84% yield (85.0 mg) with an eluent of PE/EA = 4/1, white oil. <sup>1</sup>H NMR (400 MHz, CDCl<sub>3</sub>): δ (ppm) 2.10 (s, 3H), 3.85 (d, *J* = 13.6 Hz, 1H), 3.96 (d, *J* = 13.6 Hz, 1H), 4.65 (s, 1H), 7.22 – 7.28 (m, 1H), 7.34 (t, *J* = 7.5 Hz, 2H), 7.40 – 7.55 (m, 7H), 7.61 (d, *J* = 6.9 Hz, 1H), 7.77 (d, *J* = 8.2 Hz, 1H), 7.82 – 7.88 (m, 1H), 8.24 (d, *J* = 8.2 Hz, 1H), 8.51 (d, *J* = 5.3 Hz, 2H). <sup>13</sup>C NMR (100 MHz, CDCl<sub>3</sub>): δ (ppm) 40.0, 58.0, 74.2, 123.3, 124.2, 125.4, 125.7, 125.8, 126.8, 127.8, 127.9, 128.6, 128.7, 128.7, 132.3, 133.9, 134.7, 140.1, 149.9, 151.8. HRMS (EI): exact mass calculated for [M]<sup>+</sup> (C<sub>24</sub>H<sub>22</sub>N<sub>2</sub>) requires *m/z* 338.1783, found *m/z* 338.1784.

**4am: 4-(phenyl(piperidin-1-yl)methyl)pyridine**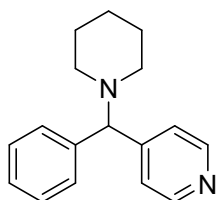

The product was obtained in 65% yield (49.2 mg) with an eluent of PE/EA = 2/1, white solid. <sup>1</sup>H NMR (400 MHz, CDCl<sub>3</sub>): δ (ppm) 1.38 – 1.48 (m, 2H), 1.53 – 1.62 (m, 4H), 2.21 – 2.38 (m, 4H), 4.23 (s, 1H), 7.18 – 7.24 (m, 1H), 7.25 – 7.31 (m, 2H), 7.31 – 7.38 (m, 4H), 8.48 (d, *J* = 5.8 Hz, 2H). <sup>13</sup>C NMR (100 MHz, CDCl<sub>3</sub>): δ (ppm) 24.5, 26.2, 53.0, 75.7, 123.1, 127.4, 128.2, 128.6, 141.1, 149.8, 152.4. HRMS (EI): exact mass calculated for [M]<sup>+</sup> (C<sub>17</sub>H<sub>20</sub>N<sub>2</sub>) requires *m/z* 252.1626, found *m/z* 252.1628.

**4an: 4-(phenyl(pyridin-4-yl)methyl)morpholine**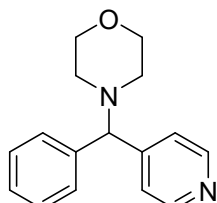

The product was obtained in 68% yield (52.1 mg) with an eluent of PE/EA = 2/1, colorless oil. <sup>1</sup>H NMR (400 MHz, CDCl<sub>3</sub>): δ (ppm) 2.33 – 2.42 (m, 4H), 3.65 – 3.78 (m, 4H), 4.20 (s, 1H), 7.19 – 7.25 (m, 1H), 7.29 (t, *J* = 7.6 Hz, 2H), 7.35 – 7.42 (m, 4H), 8.50 (d, *J* = 5.3 Hz, 2H). <sup>13</sup>C NMR (100 MHz, CDCl<sub>3</sub>): δ (ppm) 52.5, 67.1, 75.7, 123.0, 127.8, 128.1, 128.8, 140.3, 150.0, 151.5. HRMS (EI): exact mass calculated for [M]<sup>+</sup> (C<sub>16</sub>H<sub>18</sub>N<sub>2</sub>O) requires *m/z* 254.1419, found *m/z* 254.1420.

**4ao: 4-(phenyl(pyridin-4-yl)methyl)thiomorpholine**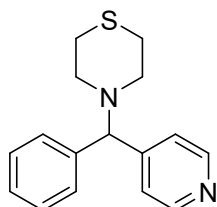

The product was obtained in 77% yield (62.1 mg) with an eluent of PE/EA = 2/1, white solid. <sup>1</sup>H NMR (400 MHz, CDCl<sub>3</sub>): δ (ppm) 2.62 – 2.72 (m, 8H), 4.39 (s, 1H), 7.20 – 7.26 (m, 1H), 7.28 – 7.35 (m, 6H), 8.50 (d, *J* = 5.7 Hz, 2H). <sup>13</sup>C NMR (100 MHz, CDCl<sub>3</sub>): δ (ppm) 28.1, 53.3, 75.0, 123.0, 127.7, 128.3, 128.8, 140.0, 150.0, 151.4. HRMS (EI): exact mass calculated for [M]<sup>+</sup> (C<sub>16</sub>H<sub>18</sub>N<sub>2</sub>S) requires *m/z* 270.1191, found *m/z* 270.1190.

#### 4ap: 4-((4-bromopiperidin-1-yl)(phenyl)methyl)pyridine

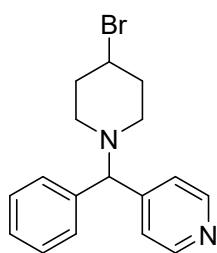

330.0732, found  $m/z$  330.0735.

The product was obtained in 56% yield (55.2 mg) with an eluent of PE/EA = 3/1, colorless oil.  $^1\text{H}$  NMR (400 MHz,  $\text{CDCl}_3$ ):  $\delta$  (ppm) 2.00 – 2.30 (m, 6H), 2.62 – 2.74 (m, 2H), 4.11 – 4.24 (m, 1H), 4.29 (s, 1H), 7.19 – 7.39 (m, 7H), 8.49 (d,  $J = 4.9$  Hz, 2H).  $^{13}\text{C}$  NMR (100 MHz,  $\text{CDCl}_3$ ):  $\delta$  (ppm) 36.5, 50.0, 50.6, 75.0, 122.9, 127.7, 128.0, 128.8, 140.6, 150.0, 151.8. HRMS (EI): exact mass calculated for  $[\text{M}]^+$  ( $\text{C}_{17}\text{H}_{19}\text{BrN}_2$ ) requires  $m/z$

#### 4aq: 1-phenyl-4-(phenyl(pyridin-4-yl)methyl)piperazine

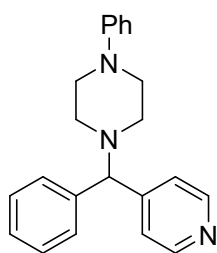

139.6, 149.0, 150.1, 150.7. HRMS (EI): exact mass calculated for  $[\text{M}]^+$  ( $\text{C}_{22}\text{H}_{23}\text{N}_3$ ) requires  $m/z$  329.1892, found  $m/z$  329.1894.

The product was obtained in 65% yield (63.9 mg) with an eluent of PE/EA = 2/1, light yellow oil.  $^1\text{H}$  NMR (400 MHz,  $\text{CDCl}_3$ ):  $\delta$  (ppm) 2.41 – 2.53 (m, 4H), 3.07 – 3.18 (m, 4H), 4.20 (s, 1H), 6.77 (t,  $J = 7.3$  Hz, 1H), 6.82 (d,  $J = 8.3$  Hz, 2H), 7.13 – 7.20 (m, 3H), 7.23 (t,  $J = 7.5$  Hz, 2H), 7.29 – 7.36 (m, 4H), 8.44 (d,  $J = 5.6$  Hz, 2H).  $^{13}\text{C}$  NMR (100 MHz,  $\text{CDCl}_3$ ):  $\delta$  (ppm) 48.1, 50.8, 74.2, 114.9, 118.7, 121.9, 126.7, 127.0, 127.8, 128.1,

#### 4ar: 2-(phenyl(pyridin-4-yl)methyl)-1,2,3,4-tetrahydroisoquinoline

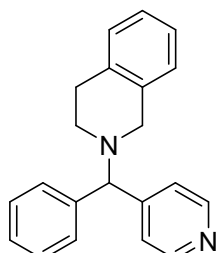

126.3, 126.8, 127.8, 128.1, 128.7, 128.9, 134.5, 134.8, 141.0, 150.1, 152.1. HRMS (EI): exact mass calculated for  $[\text{M}]^+$  ( $\text{C}_{21}\text{H}_{20}\text{N}_2$ ) requires  $m/z$  300.1626, found  $m/z$  300.1625.

The product was obtained in 73% yield (65.7 mg) with an eluent of PE/EA = 4/1, colorless oil.  $^1\text{H}$  NMR (600 MHz,  $\text{CDCl}_3$ ):  $\delta$  (ppm) 2.66 – 2.74 (m, 2H), 2.86 – 2.92 (m, 2H), 3.56 (s, 2H), 4.41 (s, 1H), 6.87 (d,  $J = 7.6$  Hz, 1H), 7.05 – 7.09 (m, 1H), 7.10 – 7.14 (m, 2H), 7.21 – 7.25 (m, 1H), 7.30 (t,  $J = 7.6$  Hz, 2H), 7.40 – 7.44 (m, 4H), 8.50 (dd,  $J = 4.6, 1.5$  Hz, 2H).  $^{13}\text{C}$  NMR (150 MHz,  $\text{CDCl}_3$ ):  $\delta$  (ppm) 29.2, 49.2, 55.0, 75.0, 122.9, 125.7,

#### 4as: 1-((3'-methoxy-[1,1'-biphenyl]-4-yl)(pyridin-4-yl)methyl)-4-methylpiperazine

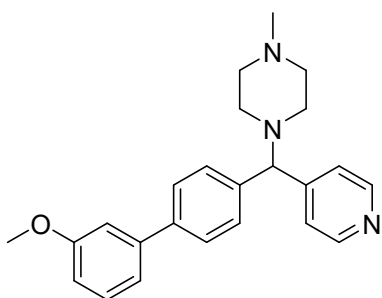

51.6, 55.2, 55.3, 74.9, 112.7, 112.8, 119.6, 123.0, 127.5, 128.4, 129.8, 139.9, 140.5, 142.1, 150.1, 151.7, 159.9. HRMS (EI): exact mass calculated for  $[\text{M}]^+$  ( $\text{C}_{24}\text{H}_{27}\text{N}_3\text{O}$ ) requires  $m/z$  373.2154, found  $m/z$  373.2151.

The product was obtained in 42% yield (47.4 mg) with an eluent of DCM/MeOH = 30/1, light yellow oil.  $^1\text{H}$  NMR (400 MHz,  $\text{CDCl}_3$ ):  $\delta$  (ppm) 2.24 (s, 3H), 2.28 – 2.60 (m, 8H), 3.76 (s, 3H), 4.19 (s, 1H), 6.80 (dd,  $J = 8.2, 2.1$  Hz, 1H), 6.97 – 7.00 (m, 1H), 7.04 (d,  $J = 7.6$  Hz, 1H), 7.25 (t,  $J = 8.0$  Hz, 1H), 7.30 – 7.37 (m, 4H), 7.43 (d,  $J = 8.1$  Hz, 2H), 8.44 (d,  $J = 5.3$  Hz, 2H).  $^{13}\text{C}$  NMR (100 MHz,  $\text{CDCl}_3$ ):  $\delta$  (ppm) 45.8,

### 5a: 2-((phenylamino)(pyridin-4-yl)methyl)phenol

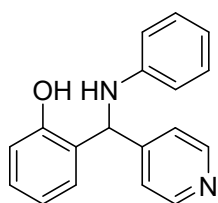

The product was obtained in 82% yield (67.8 mg) with an eluent of PE/EA = 2/1, yellow solid.  $^1\text{H}$  NMR (400 MHz,  $d_6$ -DMSO):  $\delta$  (ppm) 5.90 (d,  $J$  = 7.5 Hz, 1H), 6.36 (d,  $J$  = 7.5 Hz, 1H), 6.53 (t,  $J$  = 7.3 Hz, 1H), 6.63 (d,  $J$  = 7.8 Hz, 2H), 6.73 – 6.80 (m, 1H), 6.83 – 6.89 (m, 1H), 6.99 – 7.12 (m, 3H), 7.25 (dd,  $J$  = 7.6, 1.5 Hz, 1H), 7.36 (d,  $J$  = 5.9 Hz, 2H), 8.48 (d,  $J$  = 5.9 Hz, 2H), 9.79 (s, 1H).  $^{13}\text{C}$  NMR (100 MHz,  $d_6$ -DMSO):  $\delta$  (ppm) 53.4, 113.5, 115.8, 116.8, 119.7, 122.9, 128.3, 128.5, 128.7, 129.2, 148.2, 150.0, 152.6, 155.0. HRMS (EI): exact mass calculated for  $[\text{M}]^+$  ( $\text{C}_{18}\text{H}_{16}\text{N}_2\text{O}$ ) requires  $m/z$  276.1263, found  $m/z$  276.1264.

### 5b: *N*-(pyridin-4-yl(3-(trifluoromethoxy)phenyl)methyl)aniline

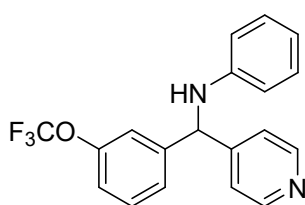

The product was obtained in 74% yield (76.5 mg) with an eluent of PE/EA = 3/1, colorless oil.  $^1\text{H}$  NMR (600 MHz,  $\text{CDCl}_3$ ):  $\delta$  (ppm) 4.33 (d,  $J$  = 2.5 Hz, 1H), 5.48 (d,  $J$  = 2.5 Hz, 1H), 6.53 (d,  $J$  = 7.9 Hz, 2H), 6.75 (t,  $J$  = 7.3 Hz, 1H), 7.11 – 7.16 (m, 3H), 7.17 – 7.20 (m, 1H), 7.24 (d,  $J$  = 7.8 Hz, 1H), 7.29 (d,  $J$  = 6.0 Hz, 2H), 7.36 (t,  $J$  = 8.0 Hz, 1H), 8.54 (d,  $J$  = 6.0 Hz, 2H).  $^{13}\text{C}$  NMR (100 MHz,  $\text{CDCl}_3$ ):  $\delta$  (ppm) 61.9, 113.7, 118.7, 119.1, 120.3 (d,  $J$  = 17.8 Hz), 120.4 (q,  $J$  = 257.5 Hz), 122.4, 125.9, 129.3, 130.5, 143.7, 146.4, 149.8, 150.3, 151.0.  $^{19}\text{F}$  NMR (377 MHz,  $\text{CDCl}_3$ ):  $\delta$  (ppm) -57.7. HRMS (EI): exact mass calculated for  $[\text{M}]^+$  ( $\text{C}_{19}\text{H}_{15}\text{F}_3\text{N}_2\text{O}$ ) requires  $m/z$  344.1136, found  $m/z$  344.1138.

### 5c: *N*-(4-fluorophenyl)(pyridin-4-yl)methyl)aniline

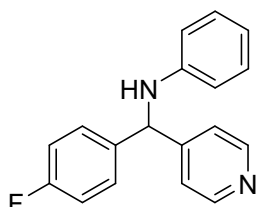

The product was obtained in 66% yield (54.9 mg) with an eluent of PE/EA = 3/1, colorless oil.  $^1\text{H}$  NMR (600 MHz,  $\text{CDCl}_3$ ):  $\delta$  (ppm) 4.17 (s, 1H), 5.45 (s, 1H), 6.52 (d,  $J$  = 6.7 Hz, 2H), 6.72 – 6.78 (m, 1H), 7.00 – 7.08 (m, 2H), 7.11 – 7.17 (m, 2H), 7.24 – 7.32 (m, 4H), 8.56 (d,  $J$  = 5.6 Hz, 2H).  $^{13}\text{C}$  NMR (150 MHz,  $\text{CDCl}_3$ ):  $\delta$  (ppm) 61.6, 113.6, 116.0 (d,  $J$  = 22.0 Hz), 118.5, 122.3, 129.3, 129.4 (d,  $J$  = 8.4 Hz), 137.3 (d,  $J$  = 2.9 Hz), 146.6, 150.3, 151.5, 162.4 (d,  $J$  = 248.1 Hz).  $^{19}\text{F}$  NMR (377 MHz,  $\text{CDCl}_3$ ):  $\delta$  (ppm) -113.8 – -113.7 (m). HRMS (EI): exact mass calculated for  $[\text{M}]^+$  ( $\text{C}_{18}\text{H}_{15}\text{FN}_2$ ) requires  $m/z$  278.1219, found  $m/z$  278.1221.

### 5d: *N*-(4-chlorophenyl)(pyridin-4-yl)methyl)aniline

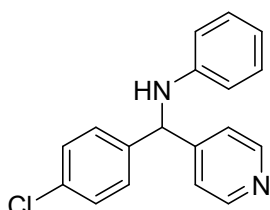

The product was obtained in 71% yield (62.8 mg) with an eluent of PE/EA = 3/1, colorless oil.  $^1\text{H}$  NMR (400 MHz,  $\text{CDCl}_3$ ):  $\delta$  (ppm) 4.15 (d,  $J$  = 3.5 Hz, 1H), 5.44 (d,  $J$  = 3.5 Hz, 1H), 6.52 (d,  $J$  = 8.2 Hz, 2H), 6.75 (t,  $J$  = 7.3 Hz, 1H), 7.14 (t,  $J$  = 7.8 Hz, 2H), 7.22 – 7.36 (m, 6H), 8.57 (d,  $J$  = 5.7 Hz, 2H).  $^{13}\text{C}$  NMR (100 MHz,  $\text{CDCl}_3$ ):  $\delta$  (ppm) 61.8, 113.7, 118.7, 122.4, 129.0, 129.3, 129.4, 134.1, 140.0, 146.6, 150.4, 151.2. HRMS (EI): exact mass calculated for  $[\text{M}]^+$  ( $\text{C}_{18}\text{H}_{15}\text{ClN}_2$ ) requires  $m/z$  294.0924, found  $m/z$  294.0925.

**5e: N-((4-bromophenyl)(pyridin-4-yl)methyl)aniline**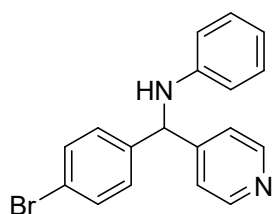

The product was obtained in 69% yield (69.7 mg) with an eluent of PE/EA = 3/1, colorless oil. <sup>1</sup>H NMR (600 MHz, CDCl<sub>3</sub>): δ (ppm) 4.22 (d, *J* = 3.5 Hz, 1H), 5.42 (d, *J* = 3.5 Hz, 1H), 6.51 (d, *J* = 7.9 Hz, 2H), 6.75 (t, *J* = 7.3 Hz, 1H), 7.13 (t, *J* = 7.9 Hz, 2H), 7.19 (d, *J* = 8.4 Hz, 2H), 7.28 (d, *J* = 5.8 Hz, 2H), 7.47 (d, *J* = 8.4 Hz, 2H), 8.55 (d, *J* = 5.3 Hz, 2H). <sup>13</sup>C NMR (150 MHz, CDCl<sub>3</sub>): δ (ppm) 61.8, 113.6, 118.6, 122.1, 122.4, 129.2, 129.3, 132.2, 140.5, 146.5, 150.3, 151.1. HRMS (EI): exact mass calculated for [M]<sup>+</sup> (C<sub>18</sub>H<sub>15</sub>BrN<sub>2</sub>) requires *m/z* 338.0419, found *m/z* 338.0420.

**5f: methyl 4-((phenylamino)(pyridin-4-yl)methyl)benzoate**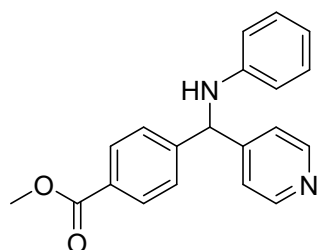

The product was obtained in 34% yield (32.8 mg) with an eluent of PE/EA = 2/1, light yellow oil. <sup>1</sup>H NMR (600 MHz, CDCl<sub>3</sub>): δ (ppm) 3.91 (s, 3H), 4.24 (s, 1H), 5.52 (s, 1H), 6.53 (d, *J* = 7.8 Hz, 2H), 6.76 (t, *J* = 7.4 Hz, 1H), 7.12 – 7.16 (m, 2H), 7.30 (d, *J* = 6.0 Hz, 2H), 7.41 (d, *J* = 8.3 Hz, 2H), 8.02 (d, *J* = 8.3 Hz, 2H), 8.57 (dd, *J* = 4.6, 1.4 Hz, 2H). <sup>13</sup>C NMR (150 MHz, CDCl<sub>3</sub>): δ (ppm) 52.3, 62.1, 113.7, 118.7, 122.4, 127.6, 129.3, 130.0, 130.4, 146.3, 146.5, 150.3, 151.0, 166.6. HRMS (EI): exact mass calculated for [M]<sup>+</sup> (C<sub>20</sub>H<sub>18</sub>N<sub>2</sub>O<sub>2</sub>) requires *m/z* 318.1368, found *m/z* 318.1369.

**5g: N,N-dimethyl-4-((phenylamino)(pyridin-4-yl)methyl)aniline**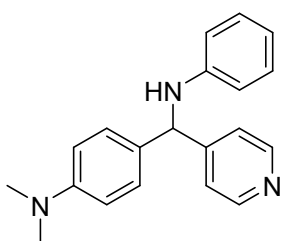

The product was obtained in 78% yield (71.1 mg) with an eluent of PE/EA = 2/1, colorless oil. <sup>1</sup>H NMR (600 MHz, CDCl<sub>3</sub>): δ (ppm) 2.92 (s, 6H), 4.20 (s, 1H), 5.35 (s, 1H), 6.48 (d, *J* = 7.9 Hz, 2H), 6.64 – 6.73 (m, 3H), 7.09 – 7.15 (m, 4H), 7.33 (d, *J* = 4.9 Hz, 2H), 8.52 (d, *J* = 4.9 Hz, 2H). <sup>13</sup>C NMR (150 MHz, CDCl<sub>3</sub>): δ (ppm) 40.5, 61.8, 112.6, 113.5, 118.0, 122.3, 128.6, 129.2, 129.3, 147.1, 150.0, 150.3, 152.6. HRMS (EI): exact mass calculated for [M]<sup>+</sup> (C<sub>20</sub>H<sub>21</sub>N<sub>3</sub>) requires *m/z* 303.1735, found *m/z* 303.1735.

**5h: N-((3,5-dimethoxyphenyl)(pyridin-4-yl)methyl)aniline**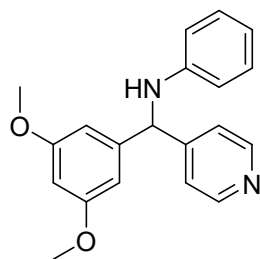

The product was obtained in 38% yield (36.8 mg) with an eluent of PE/EA = 2/1, light yellow oil. <sup>1</sup>H NMR (600 MHz, CDCl<sub>3</sub>): δ (ppm) 3.77 (s, 3H), 3.79 (s, 3H), 4.28 (s, 1H), 5.77 (s, 1H), 6.44 (dd, *J* = 8.4, 2.3 Hz, 1H), 6.48 (d, *J* = 2.3 Hz, 1H), 6.54 (d, *J* = 7.9 Hz, 2H), 6.71 (t, *J* = 7.3 Hz, 1H), 7.09 (d, *J* = 8.4 Hz, 1H), 7.13 (t, *J* = 7.9 Hz, 2H), 7.30 (d, *J* = 5.2 Hz, 2H), 8.51 (d, *J* = 5.2 Hz, 2H). <sup>13</sup>C NMR (150 MHz, CDCl<sub>3</sub>): δ (ppm) 54.4, 54.5, 54.6, 97.9, 103.5, 112.4, 116.9, 121.2, 121.3, 128.1, 128.2, 146.2, 148.8, 151.5, 156.6, 159.5. HRMS (EI): exact mass calculated for [M]<sup>+</sup> (C<sub>20</sub>H<sub>20</sub>N<sub>2</sub>O<sub>2</sub>) requires

m/z 320.1525, found m/z 320.1524.

### 5i: 2-methoxy-4-((phenylamino)(pyridin-4-yl)methyl)phenol

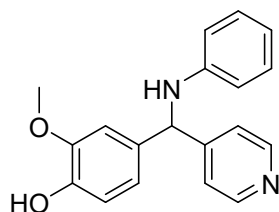

The product was obtained in 46% yield (42.3mg) with an eluent of PE/EA = 2/1, light yellow oil. <sup>1</sup>H NMR (400 MHz, CDCl<sub>3</sub>): δ (ppm) 3.84 (s, 3H), 4.19 (s, 1H), 5.39 (s, 1H), 6.51 (d, *J* = 8.2 Hz, 2H), 6.71 – 6.79 (m, 3H), 6.88 (d, *J* = 8.2 Hz, 1H), 7.14 (t, *J* = 7.7 Hz, 2H), 7.37 (d, *J* = 5.5 Hz, 2H), 8.57 (d, *J* = 5.5 Hz, 2H). <sup>13</sup>C NMR (100 MHz, CDCl<sub>3</sub>): δ (ppm) 54.9, 61.1, 109.1, 112.5, 113.8, 117.2, 119.7, 121.3, 128.2, 132.24, 144.7, 145.8, 146.1, 148.8, 151.2. HRMS (EI): exact mass calculated for [M]<sup>+</sup> (C<sub>19</sub>H<sub>18</sub>N<sub>2</sub>O<sub>2</sub>) requires m/z 306.1368, found m/z 306.1370.

### 5j: *N*-(mesityl(pyridin-4-yl)methyl)aniline

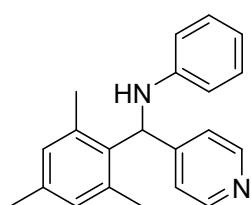

The product was obtained in 81% yield (73.2 mg) with an eluent of PE/EA = 3/1 white solid. <sup>1</sup>H NMR (400 MHz, CDCl<sub>3</sub>): δ (ppm) 2.19 (s, 6H), 2.28 (s, 3H), 4.13 (d, *J* = 3.5 Hz, 1H), 5.86 (d, *J* = 3.5 Hz, 1H), 6.55 (d, *J* = 7.9 Hz, 2H), 6.76 (t, *J* = 7.3 Hz, 1H), 6.88 (s, 2H), 7.14 – 7.21 (m, 4H), 8.49 (d, *J* = 5.2 Hz, 2H). <sup>13</sup>C NMR (150 MHz, CDCl<sub>3</sub>): δ (ppm) 20.8, 21.2, 57.1, 112.9, 118.1, 122.2, 129.4, 130.4, 136.6, 137.8, 147.8, 149.6, 149.7, 152.5. HRMS (EI): exact mass calculated for [M]<sup>+</sup> (C<sub>21</sub>H<sub>22</sub>N<sub>2</sub>) requires m/z 302.1783, found m/z 302.1784.

### 5k: *N*-(naphthalen-2-yl(pyridin-4-yl)methyl)aniline

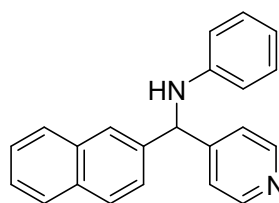

The product was obtained in 67% yield (62.0 mg) with an eluent of PE/EA = 2/1, white solid. <sup>1</sup>H NMR (400 MHz, CDCl<sub>3</sub>): δ (ppm) 4.34 (d, *J* = 3.1 Hz, 1H), 5.64 (d, *J* = 3.3 Hz, 1H), 6.58 (d, *J* = 7.7 Hz, 2H), 6.77 (t, *J* = 7.3 Hz, 1H), 7.12 – 7.20 (m, 2H), 7.36 – 7.45 (m, 3H), 7.47 – 7.54 (m, 2H), 7.75 – 7.90 (m, 4H), 8.58 (d, *J* = 6.0 Hz, 2H). <sup>13</sup>C NMR (100 MHz, CDCl<sub>3</sub>): δ (ppm) 62.5, 113.6, 118.4, 122.6, 125.4, 126.5, 126.6, 126.7, 127.8, 128.1, 129.1, 129.3, 133.0, 133.4, 138.8, 146.8, 150.2, 151.7. HRMS (EI): exact mass calculated for [M]<sup>+</sup> (C<sub>22</sub>H<sub>18</sub>N<sub>2</sub>) requires m/z 310.1470, found m/z 310.1471.

### 5l: *N*-benzyl-*N*-methyl-1-(pyridin-4-yl)-1-(1*H*-pyrrol-2-yl)methanamine

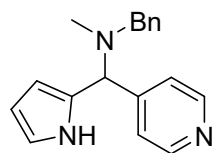

The product was obtained in 65% yield (53.8 mg) with an eluent of PE/EA = 3/1, yellow oil. <sup>1</sup>H NMR (400 MHz, CDCl<sub>3</sub>): δ (ppm) 2.11 (s, 3H), 3.44 (d, *J* = 13.4 Hz, 1H), 3.52 (d, *J* = 13.4 Hz, 1H), 4.75 (s, 1H), 6.00 – 6.03 (m, 1H), 6.15 (dd, *J* = 5.9, 2.8 Hz, 1H), 6.77 – 6.81 (m, 1H), 7.24 – 7.29 (m, 1H), 7.31 – 7.37 (m, 4H), 7.39 (dd, *J* = 4.6, 1.4 Hz, 2H), 8.57 (dd, *J* = 4.5, 1.4 Hz, 2H), 8.64 (s, 1H). <sup>13</sup>C NMR (100 MHz, CDCl<sub>3</sub>): δ (ppm) 39.2, 59.0, 66.0, 108.3, 108.5, 118.0, 123.8, 127.3, 128.6, 128.7, 129.8, 139.0, 148.7, 149.9. HRMS (EI): exact mass calculated for [M]<sup>+</sup>

(C<sub>18</sub>H<sub>19</sub>N<sub>3</sub>) requires m/z 277.1579, found m/z 277.1580.

**5m: *N*-benzyl-*N*-methyl-1-(5-methylfuran-2-yl)-1-(pyridin-4-yl)methanamine**

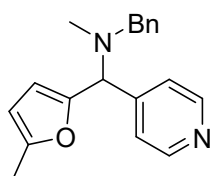

The product was obtained in 58% yield (51.1 mg) with an eluent of PE/EA = 3/1, colorless oil. <sup>1</sup>H NMR (600 MHz, CDCl<sub>3</sub>): δ (ppm) 2.14 (s, 3H), 2.29 (s, 3H), 3.49 (d, *J* = 13.4 Hz, 1H), 3.56 (d, *J* = 13.4 Hz, 1H), 4.69 (s, 1H), 5.95 (d, *J* = 2.1 Hz, 1H), 6.14 (d, *J* = 3.0 Hz, 1H), 7.23 – 7.27 (m, 1H), 7.32 (t, *J* = 7.6 Hz, 2H), 7.37 (d, *J* = 7.4 Hz, 2H), 7.43 (d, *J* = 5.6 Hz, 2H), 8.55 (d, *J* = 5.6 Hz, 2H). <sup>13</sup>C NMR (150 MHz, CDCl<sub>3</sub>): δ (ppm) 13.8, 39.3, 59.0, 64.9, 106.1, 110.7, 123.4, 127.1, 128.3, 128.7, 139.2, 149.7, 149.7, 150.1, 152.4. HRMS (EI): exact mass calculated for [M]<sup>+</sup> (C<sub>19</sub>H<sub>20</sub>N<sub>2</sub>O) requires m/z 292.1576, found m/z 292.1576.

**5n: *N*-benzyl-*N*-methyl-1-(pyridin-4-yl)-1-(thiophen-3-yl)methanamine**

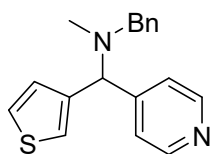

The product was obtained in 65% yield (57.6 mg) with an eluent of PE/EA = 3/1, yellow oil. <sup>1</sup>H NMR (600 MHz, CDCl<sub>3</sub>): δ (ppm) 2.07 (s, 3H), 3.43 (d, *J* = 13.5 Hz, 1H), 3.51 (d, *J* = 13.5 Hz, 1H), 4.70 (s, 1H), 7.05 (dd, *J* = 5.0, 0.9 Hz, 1H), 7.15 – 7.17 (m, 1H), 7.23 (t, *J* = 7.3 Hz, 1H), 7.26 (dd, *J* = 5.0, 3.0 Hz, 1H), 7.31 (t, *J* = 7.6 Hz, 2H), 7.35 – 7.41 (m, 4H), 8.53 (d, *J* = 5.9 Hz, 2H). <sup>13</sup>C NMR (150 MHz, CDCl<sub>3</sub>): δ (ppm) 39.5, 59.2, 68.2, 123.3, 126.1, 127.1, 127.5, 128.4, 128.6, 139.2, 140.8, 149.9, 151.1. HRMS (EI): exact mass calculated for [M]<sup>+</sup> (C<sub>18</sub>H<sub>18</sub>N<sub>2</sub>S) requires m/z 294.1191, found m/z 294.1192.

**5o: *N*-((1*H*-indol-3-yl)(pyridin-4-yl)methyl)aniline**

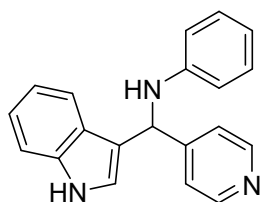

The product was obtained in 38% yield (34.0 mg) with an eluent of PE/EA = 1/1, yellow oil. <sup>1</sup>H NMR (400 MHz, CDCl<sub>3</sub>): δ (ppm) 4.40 (s, 1H), 5.81 (s, 1H), 6.53 – 6.58 (m, 2H), 6.73 – 6.79 (m, 2H), 7.11 – 7.20 (m, 3H), 7.22 – 7.28 (m, 1H), 7.40 (d, *J* = 8.2 Hz, 1H), 7.49 (d, *J* = 5.9 Hz, 2H), 7.60 (d, *J* = 7.9 Hz, 1H), 8.58 (dd, *J* = 4.5, 1.5 Hz, 2H), 8.61 (s, 1H). <sup>13</sup>C NMR (100 MHz, CDCl<sub>3</sub>): δ (ppm) 55.1, 111.6, 113.3, 117.4, 118.0, 119.1, 120.1, 122.5, 122.8, 123.4, 125.7, 129.3, 136.7, 147.2, 149.8, 152.3. HRMS (EI): exact mass calculated for [M]<sup>+</sup> (C<sub>20</sub>H<sub>17</sub>N<sub>3</sub>) requires m/z 299.1422, found m/z 299.1425.

**5p: *N*-(2-methyl-1-(pyridin-4-yl)but-2-en-1-yl)aniline**

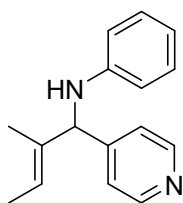

The product was obtained in 31% yield (22.3 mg, *E*:*Z* = 4.5:1) with an eluent of PE/EA = 4/1, colorless oil. <sup>1</sup>H NMR (600 MHz, CDCl<sub>3</sub>): δ (ppm) 1.56 (dt, *J* = 22.3 Hz, 6.9 Hz, 3H), 1.65 (d, *J* = 6.7 Hz, 2.45H), 1.82 (dd, *J* = 6.9, 1.1 Hz, 0.55H), 4.00 (s, 1H), 4.79 (s, 0.82H), 5.39 (s, 0.18H), 5.54 – 5.65 (m, 1H), 6.52 (dd, *J* = 24.7, 8.0 Hz, 2H), 6.73 (dt, *J* = 14.7, 7.3 Hz, 1H), 7.14 (dt, *J* = 15.6, 7.8 Hz, 2H), 7.31 (dd, *J* = 10.5, 5.8 Hz, 2H), 8.55 (d, *J* = 5.8 Hz, 2H). <sup>13</sup>C NMR (150 MHz, CDCl<sub>3</sub>): δ (ppm) 13.2, 13.4, 65.1, 113.5, 118.1, 122.2, 124.2, 129.3, 134.6, 147.1, 149.9,

151.1. HRMS (EI): exact mass calculated for  $[M]^+$  ( $C_{16}H_{18}N_2$ ) requires  $m/z$  238.1470, found  $m/z$  238.1473.

**5q: *N*-(2-ethyl-1-(pyridin-4-yl)but-2-en-1-yl)aniline**

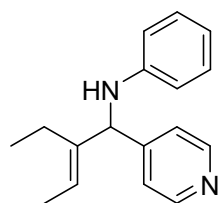

The product was obtained in 43% yield (32.7 mg, *E:Z* = 3:1) with an eluent of PE/EA = 4/1, colorless oil.  $^1H$  NMR (600 MHz,  $CDCl_3$ ):  $\delta$  (ppm) 0.95 (dt,  $J$  = 24.3, 7.4 Hz, 3H), 1.64 (d,  $J$  = 6.8 Hz, 2.25H), 1.80 (d,  $J$  = 6.9 Hz, 0.75H), 1.91 – 2.02 (m, 0.5H), 2.07 – 2.17 (m, 1.5H), 3.98 (s, 1H), 4.82 (s, 0.75H), 5.36 – 5.42 (m, 1H), 5.57 (q,  $J$  = 6.9 Hz, 0.25H), 6.51 (dd,  $J$  = 24.9, 7.8 Hz, 2H), 6.72 (dt,  $J$  = 20.4, 7.3 Hz, 1H), 7.09 – 7.18 (m, 2H), 7.30 (dd,  $J$  = 11.6, 5.5 Hz, 2H), 8.54 (d,  $J$  = 3.7 Hz, 2H).  $^{13}C$  NMR (150 MHz,  $CDCl_3$ ):  $\delta$  (ppm) 12.9, 13.6, 23.4, 59.8, 113.3, 118.0, 122.1, 123.8, 129.2, 140.9, 147.2, 149.9, 151.4. HRMS (EI): exact mass calculated for  $[M]^+$  ( $C_{17}H_{20}N_2$ ) requires  $m/z$  252.1626, found  $m/z$  252.1628.

**5r: *N*-(3-methyl-1-(pyridin-4-yl)but-2-en-1-yl)aniline**

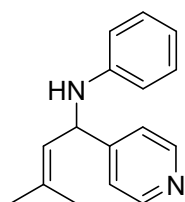

The product was obtained in 40% yield (28.8 mg) with an eluent of PE/EA = 4/1, colorless oil.  $^1H$  NMR (600 MHz,  $CDCl_3$ ):  $\delta$  (ppm) 1.76 (d,  $J$  = 1.0 Hz, 3H), 1.83 (d,  $J$  = 1.0 Hz, 3H), 3.99 (s, 1H), 5.05 (d,  $J$  = 8.7 Hz, 1H), 5.20 – 5.26 (m, 1H), 6.49 (d,  $J$  = 7.7 Hz, 2H), 6.70 (t,  $J$  = 7.3 Hz, 1H), 7.09 – 7.14 (m, 2H), 7.30 (d,  $J$  = 5.9 Hz, 2H), 8.52 (d,  $J$  = 5.9 Hz, 2H).  $^{13}C$  NMR (150 MHz,  $CDCl_3$ ):  $\delta$  (ppm) 18.8, 25.7, 56.0, 113.4, 117.9, 121.7, 125.7, 129.2, 136.3, 146.9, 150.0, 153.2. HRMS (EI): exact mass calculated for  $[M]^+$  ( $C_{16}H_{18}N_2$ ) requires  $m/z$  238.1470, found  $m/z$  238.1472.

**5s: *N*-(2-methyl-1-(pyridin-4-yl)pentyl)aniline**

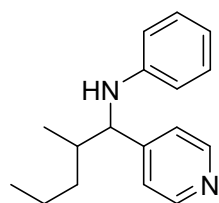

The product was obtained in 27% yield (20.7 mg) with an eluent of PE/EA = 4/1, colorless oil.  $^1H$  NMR (400 MHz,  $CDCl_3$ ):  $\delta$  (ppm) 0.84 – 0.95 (m, 6H), 1.09 – 1.26 (m, 2H), 1.37 – 1.51 (m, 2H), 1.85 – 2.00 (m, 1H), 4.05 (s, 1H), 4.20 – 4.32 (m, 1H), 6.44 (d,  $J$  = 8.1 Hz, 2H), 6.66 (td,  $J$  = 7.3, 2.8 Hz, 1H), 7.08 (td,  $J$  = 8.1, 3.1 Hz, 2H), 7.24 (d,  $J$  = 5.6 Hz, 2H), 8.52 (d,  $J$  = 5.6 Hz, 2H).  $^{13}C$  NMR (100 MHz,  $CDCl_3$ ):  $\delta$  (ppm) 14.3, 15.6, 20.6, 35.5, 39.3, 61.6, 113.3, 117.8, 122.7, 129.4, 147.2, 149.8, 152.3. HRMS (EI): exact mass calculated for  $[M]^+$  ( $C_{17}H_{22}N_2$ ) requires  $m/z$  254.1783, found  $m/z$  254.1786.

**6a: *N*-benzyl-1-(2-fluoropyridin-4-yl)-*N*-methyl-1-phenylmethanamine**

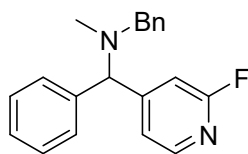

The product was obtained in 18% yield (16.3 mg) with an eluent of PE/EA = 30/1, colorless oil.  $^1H$  NMR (400 MHz,  $CDCl_3$ ):  $\delta$  (ppm) 2.09 (s, 3H), 3.44 (d,  $J$  = 13.5 Hz, 1H), 3.56 (d,  $J$  = 13.5 Hz, 1H), 4.53 (s, 1H), 7.12 (s, 1H), 7.27 – 7.43 (m, 11H), 8.13 (d,  $J$  = 5.1 Hz, 1H).  $^{13}C$  NMR (100 MHz,  $CDCl_3$ ):  $\delta$  (ppm) 40.1, 59.7, 73.8 (d,  $J$  = 2.4 Hz), 108.6 (d,  $J$  = 37.6 Hz),

120.9 (d,  $J = 3.8$  Hz), 127.3, 128.0, 128.5, 128.6, 128.7, 129.0, 139.1, 139.9, 147.8 (d,  $J = 14.8$  Hz), 158.5 (d,  $J = 7.3$  Hz), 164.4 (d,  $J = 238.7$  Hz).  $^{19}\text{F}$  NMR (377 MHz,  $\text{CDCl}_3$ ):  $\delta$  (ppm) -68.1. HRMS (EI): exact mass calculated for  $[\text{M}]^+$  ( $\text{C}_{20}\text{H}_{19}\text{FN}_2$ ) requires  $m/z$  306.1532, found  $m/z$  306.1533.

**6b: *N*-benzyl-1-(2-chloropyridin-4-yl)-*N*-methyl-1-phenylmethanamine**

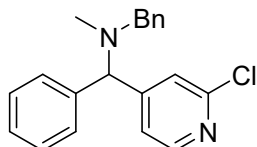

The product was obtained in 29% yield (28.3 mg) with an eluent of PE/EA = 30/1, colorless oil.  $^1\text{H}$  NMR (400 MHz,  $\text{CDCl}_3$ ):  $\delta$  (ppm) 2.07 (s, 3H), 3.41 (d,  $J = 13.5$  Hz, 1H), 3.54 (d,  $J = 13.5$  Hz, 1H), 4.48 (s, 1H), 7.23 – 7.29 (m, 2H), 7.30 – 7.41 (m, 9H), 7.48 (s, 1H), 8.29 (d,  $J = 5.1$  Hz, 1H).  $^{13}\text{C}$  NMR (150 MHz,  $\text{CDCl}_3$ ):  $\delta$  (ppm) 40.0, 59.6, 73.7, 121.8, 123.4, 127.2, 128.0, 128.3, 128.4, 128.6, 128.9, 138.9, 139.8, 149.8, 151.9, 155.8. HRMS (EI): exact mass calculated for  $[\text{M}]^+$  ( $\text{C}_{20}\text{H}_{19}\text{ClN}_2$ ) requires  $m/z$  322.1237, found  $m/z$  322.1239.

**6c: methyl 4-((benzyl(methyl)amino)(phenyl)methyl)picolinate**

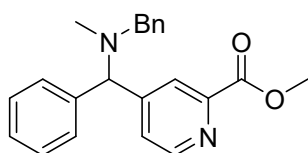

The product was obtained in 40% yield (41.7 mg) with an eluent of PE/EA = 3/1, colorless oil.  $^1\text{H}$  NMR (400 MHz,  $\text{CDCl}_3$ ):  $\delta$  (ppm) 2.08 (s, 3H), 3.42 (d,  $J = 13.4$  Hz, 1H), 3.54 (d,  $J = 13.4$  Hz, 1H), 4.01 (s, 3H), 4.53 (s, 1H), 7.22 – 7.28 (m, 1H), 7.30 – 7.40 (m, 7H), 7.41 – 7.46 (m, 2H), 7.56 (d,  $J = 5.0$  Hz, 1H), 7.97 (s, 1H), 8.56 (d,  $J = 5.0$  Hz, 1H).  $^{13}\text{C}$  NMR (150 MHz,  $\text{CDCl}_3$ ):  $\delta$  (ppm) 40.1, 53.9, 59.6, 74.3, 120.5, 124.6, 127.1, 127.8, 128.3, 128.4, 128.6, 128.8, 139.0, 140.5, 147.9, 149.4, 153.9, 166.9. HRMS (EI): exact mass calculated for  $[\text{M}]^+$  ( $\text{C}_{22}\text{H}_{22}\text{N}_2\text{O}_2$ ) requires  $m/z$  346.1681, found  $m/z$  346.1684.

**6d: *N*-((3-bromopyridin-4-yl)(phenyl)methyl)aniline**

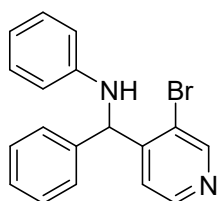

The product was obtained in 32% yield (32.7 mg) with an eluent of PE/EA = 12/1, colorless oil.  $^1\text{H}$  NMR (400 MHz,  $\text{CDCl}_3$ ):  $\delta$  (ppm) 4.24 (s, 1H), 5.75 (d,  $J = 2.4$  Hz, 1H), 6.46 (d,  $J = 8.0$  Hz, 2H), 6.74 (t,  $J = 7.3$  Hz, 1H), 7.14 (t,  $J = 7.6$  Hz, 2H), 7.28 – 7.40 (m, 5H), 7.59 (d,  $J = 4.9$  Hz, 1H), 8.49 (d,  $J = 4.9$  Hz, 1H), 8.69 (s, 1H).  $^{13}\text{C}$  NMR (150 MHz,  $\text{CDCl}_3$ ):  $\delta$  (ppm) 61.6, 113.4, 118.5, 122.1, 123.4, 128.3, 128.4, 129.0, 129.4, 139.4, 146.3, 148.8, 150.0, 152.5. HRMS (EI): exact mass calculated for  $[\text{M}]^+$  ( $\text{C}_{18}\text{H}_{15}\text{BrN}_2$ ) requires  $m/z$  338.0419, found  $m/z$  338.0421.

**6e: *N*-((3,5-difluoropyridin-4-yl)(phenyl)methyl)aniline**

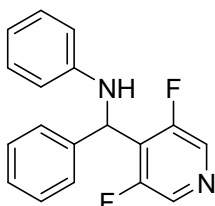

The product was obtained in 34% yield (30.5 mg) with an eluent of PE/EA = 30/1, colorless oil.  $^1\text{H}$  NMR (400 MHz,  $\text{CDCl}_3$ ):  $\delta$  (ppm) 4.60 (s, 1H), 6.18 (s, 1H), 6.69 (d,  $J = 8.3$  Hz, 2H), 6.75 (t,  $J = 7.4$  Hz, 1H), 7.16 (t,  $J = 7.7$  Hz, 2H), 7.27 – 7.43 (m, 5H), 8.32 (s, 2H).  $^{13}\text{C}$  NMR (150 MHz,  $\text{CDCl}_3$ ):  $\delta$  (ppm) 52.1, 113.4, 118.9, 126.6, 127.7 (t,  $J = 14.4$  Hz), 128.2,



129.0, 129.5, 134.8 (dd,  $J = 24.4, 4.4$  Hz), 139.0, 146.1, 157.3 (dd,  $J = 259.6, 2.4$  Hz).  $^{19}\text{F}$  NMR (377 MHz,  $\text{CDCl}_3$ ):  $\delta$  (ppm) -129.3. HRMS (EI): exact mass calculated for  $[\text{M}]^+$  ( $\text{C}_{18}\text{H}_{14}\text{F}_2\text{N}_2$ ) requires  $m/z$  296.1125, found  $m/z$  296.1124.

**6f: *N*-benzyl-*N*-methyl-1-phenyl-1-(pyridin-4-yl)methanamine**

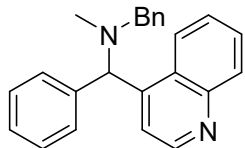

The product was obtained in 50% yield (50.5 mg) with an eluent of PE/EA = 30/1, colorless oil.  $^1\text{H}$  NMR (400 MHz,  $\text{CDCl}_3$ ):  $\delta$  (ppm) 2.08 (s, 3H), 3.33 (d,  $J = 13.5$  Hz, 1H), 3.68 (d,  $J = 13.5$  Hz, 1H), 4.79 (s, 1H), 7.14 – 7.23 (m, 3H), 7.24 – 7.33 (m, 6H), 7.60 (dd,  $J = 16.8, 7.7$  Hz, 3H), 7.74 (t,  $J = 7.7$  Hz, 1H), 8.06 (dd,  $J = 16.8, 8.2$  Hz, 2H), 8.15 (s, 1H).  $^{13}\text{C}$  NMR (150 MHz,  $\text{CDCl}_3$ ):  $\delta$  (ppm) 39.6, 58.7, 76.8, 114.9, 118.4, 123.4, 123.7, 123.8, 126.1, 126.9, 127.1, 127.4, 127.6, 128.0, 129.0, 130.0, 137.8, 139.4, 146.3, 162.0. HRMS (ESI): exact mass calculated for  $[\text{M}+\text{H}]^+$  ( $\text{C}_{24}\text{H}_{23}\text{N}_2$ ) requires  $m/z$  339.1861, found  $m/z$  339.1862.

**6g: *N*-benzyl-*N*-methyl-1-phenyl-1-(quinolin-2-yl)methanamine**

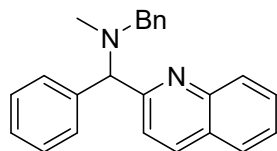

The product was obtained in 30% yield (30.8 mg) with an eluent of PE/EA = 30/1, colorless oil.  $^1\text{H}$  NMR (400 MHz,  $\text{CDCl}_3$ ):  $\delta$  (ppm) 2.14 (s, 3H), 3.47 (d,  $J = 13.6$  Hz, 1H), 3.68 (d,  $J = 13.6$  Hz, 1H), 4.84 (s, 1H), 7.16 – 7.26 (m, 2H), 7.27 – 7.35 (m, 4H), 7.41 (d,  $J = 7.4$  Hz, 2H), 7.47 (t,  $J = 7.4$  Hz, 1H), 7.63 – 7.76 (m, 4H), 7.89 (d,  $J = 8.6$  Hz, 1H), 8.08 (dd,  $J = 8.6, 4.6$  Hz, 2H).  $^{13}\text{C}$  NMR (150 MHz,  $\text{CDCl}_3$ ):  $\delta$  (ppm) 40.6, 59.8, 78.5, 119.9, 126.2, 126.9, 127.4, 127.5, 128.2, 128.2, 128.3, 128.7, 128.7, 129.2, 129.4, 136.8, 139.5, 141.6, 147.5, 163.2. HRMS (ESI): exact mass calculated for  $[\text{M}+\text{H}]^+$  ( $\text{C}_{24}\text{H}_{23}\text{N}_2$ ) requires  $m/z$  339.1861, found  $m/z$  339.1862.

**6h: *N*-benzyl-1-(isoquinolin-1-yl)-*N*-methyl-1-phenylmethanamine**

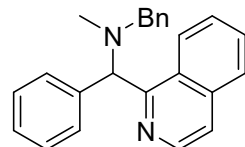

The product was obtained in 71% yield (72.3 mg) with an eluent of PE/EA = 10/1, colorless oil.  $^1\text{H}$  NMR (600 MHz,  $\text{CDCl}_3$ ):  $\delta$  (ppm) 2.24 (s, 3H), 3.55 (d,  $J = 13.4$  Hz, 1H), 3.84 (d,  $J = 13.4$  Hz, 1H), 5.47 (s, 1H), 7.15 (t,  $J = 7.4$  Hz, 1H), 7.21 – 7.32 (m, 5H), 7.35 (d,  $J = 7.3$  Hz, 2H), 7.50 (d,  $J = 5.6$  Hz, 1H), 7.54 – 7.62 (m, 2H), 7.68 (d,  $J = 7.4$  Hz, 2H), 7.75 (d,  $J = 8.4$  Hz, 1H), 8.56 (d,  $J = 5.6$  Hz, 1H), 8.89 (d,  $J = 8.4$  Hz, 1H).  $^{13}\text{C}$  NMR (150 MHz,  $\text{CDCl}_3$ ):  $\delta$  (ppm) 40.6, 60.0, 74.8, 120.2, 125.7, 126.9, 127.0, 127.2, 127.5, 128.2, 128.3, 129.0, 129.1, 129.8, 136.8, 139.1, 140.8, 142.0, 160.6. HRMS (ESI): exact mass calculated for  $[\text{M}+\text{H}]^+$  ( $\text{C}_{24}\text{H}_{23}\text{N}_2$ ) requires  $m/z$  339.1861, found  $m/z$  339.1864.

## 9: ethyl 4-((4-bromophenyl)amino)-2-methylene-4-phenylbutanoate

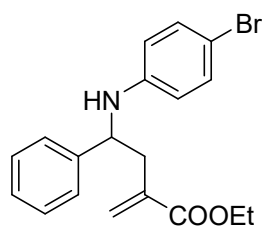

The product was obtained in 71% yield (38.5 mg) with an eluent of PE/EA = 25/1, colorless oil.  $^1\text{H}$  NMR (400 MHz,  $\text{CDCl}_3$ ):  $\delta$  (ppm) 1.24 (t,  $J = 7.2$  Hz, 3H), 2.60 – 2.75 (m, 2H), 4.15 (q,  $J = 6.8$  Hz, 2H), 4.34 – 4.42 (m, 1H), 4.57 (s, 1H), 5.47 (s, 1H), 6.15 (s, 1H), 6.28 (d,  $J = 8.3$  Hz, 2H), 7.05 (d,  $J = 8.3$  Hz, 2H), 7.12 – 7.20 (m, 1H), 7.22 – 7.29 (m, 4H).  $^{13}\text{C}$  NMR (100 MHz,  $\text{CDCl}_3$ ):  $\delta$  (ppm) 14.2, 41.2, 58.3, 61.2, 108.8, 114.9, 126.3, 127.3, 128.1, 128.7, 131.7, 137.3, 142.8, 146.2, 167.6. HRMS (EI): exact mass calculated for  $[\text{M}]^+$  ( $\text{C}_{19}\text{H}_{20}\text{BrNO}_2$ ) requires  $m/z$  373.0677, found  $m/z$  373.0678.

## G: Unsuccessful Substrates

unsuccessful aldehyde or ketone

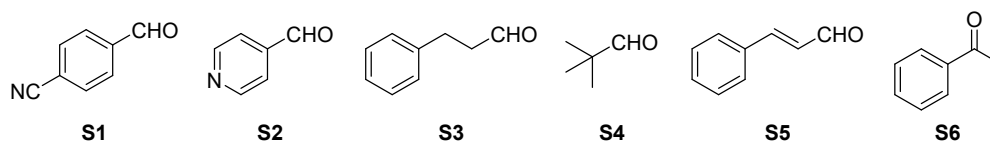

unsuccessful amine

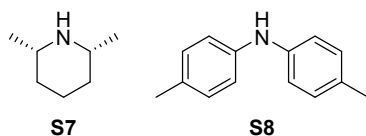

unsuccessful aromatic nitrile

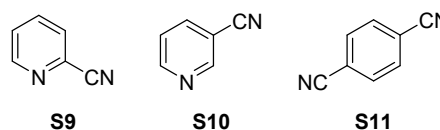

The unsuccessful substrates were listed above, a series of screening were conducted to explore the viable reaction conditions and provided some side products (Scheme S2). But some meaningful insights were extracted from the side reactions.

Aromatic aldehydes with electron-withdrawing groups proved to be unsuitable substrates, because the *in-situ* formed imine intermediate was reduced prior to coupling with **3a**. For example, the electrochemical reaction involving the substrate **S1** afforded the reductive amination product **S12** in a yield of 57%. The result of the 4-pyridinecarboxaldehyde **S2** was similar, and the reductive amination product was obtained (47% yield). The effect of fatty aldehyde was generally poor, like the substrate **1r**, when 3-phenylpropanaldehyde **S3** and pivalaldehyde **S4** as substrates, the desired product could only be obtained in single-digit yield. In addition, cinnamaldehyde **S5** and acetophenone **S6** could not achieve electrochemical reductive coupling. Large sterically hindered secondary amines might not be suitable coupling components. For example, the reaction involving substrates **S7** and **S8** only yielded the product **S14**, which coupled from benzaldehyde with **3a**. Finally, some aromatic nitriles such as 2-cyanopyridine **S9**, 3-cyanopyridine **S10** and 1,4-Dicyanobenzene **S11** could not afford the coupling products, but they had reduction behavior at the cathode, and the imine intermediate was attacked by the cyano anion to give the side product **S15**.

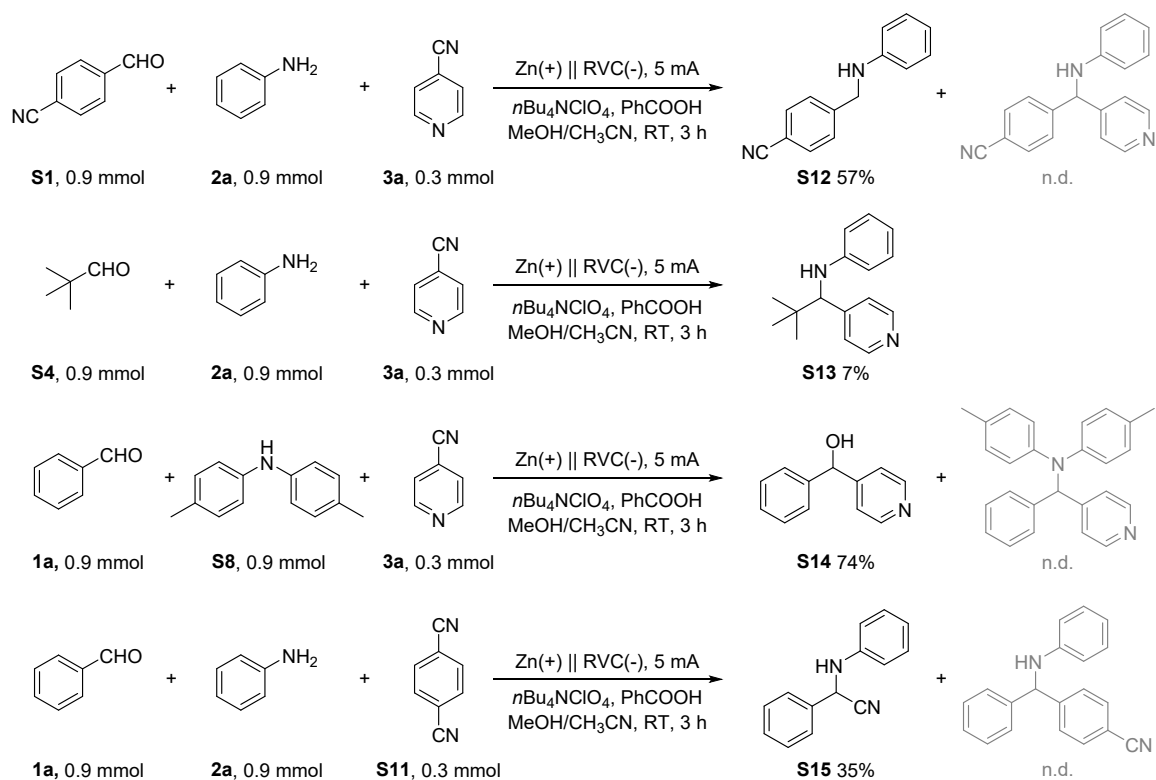

**Scheme S2.** Some unsuccessful reactions and their side products.

## H: NMR Spectra of Products.

### 4a: *N*-benzyl-1-phenyl-1-(pyridin-4-yl)methanamine

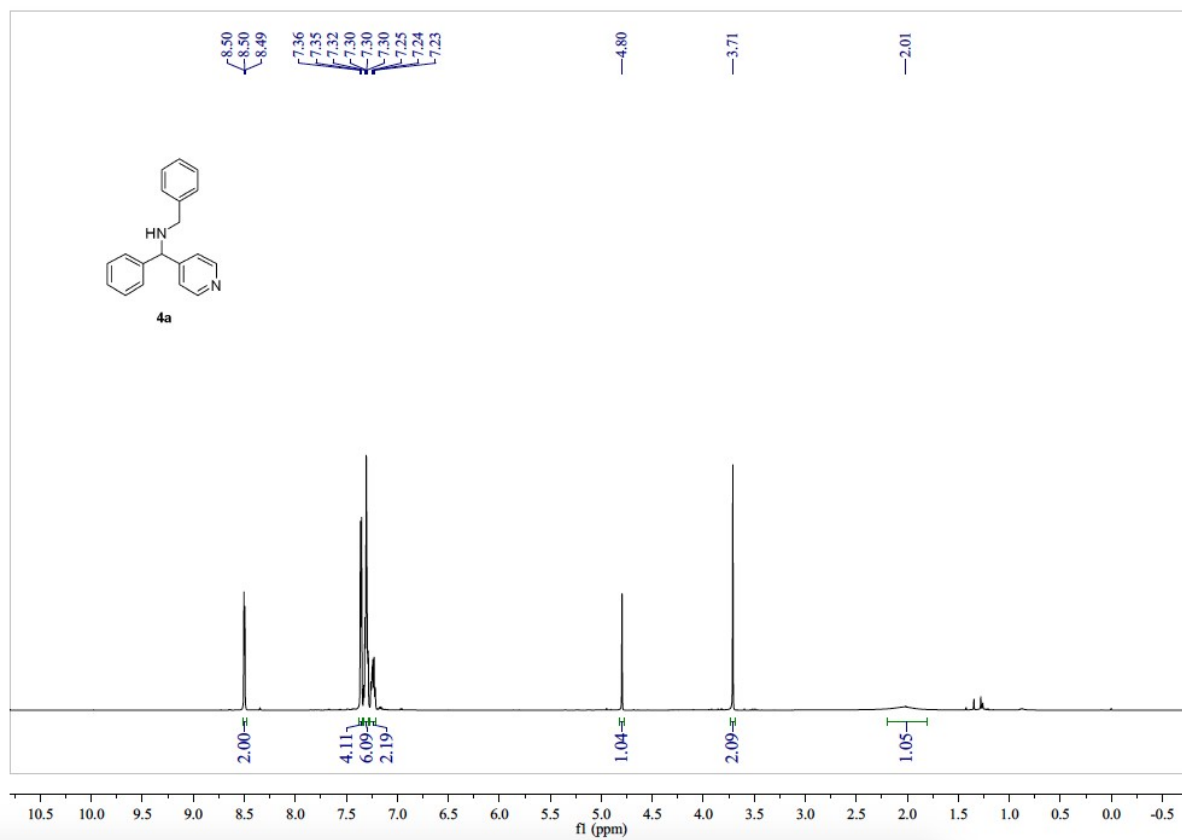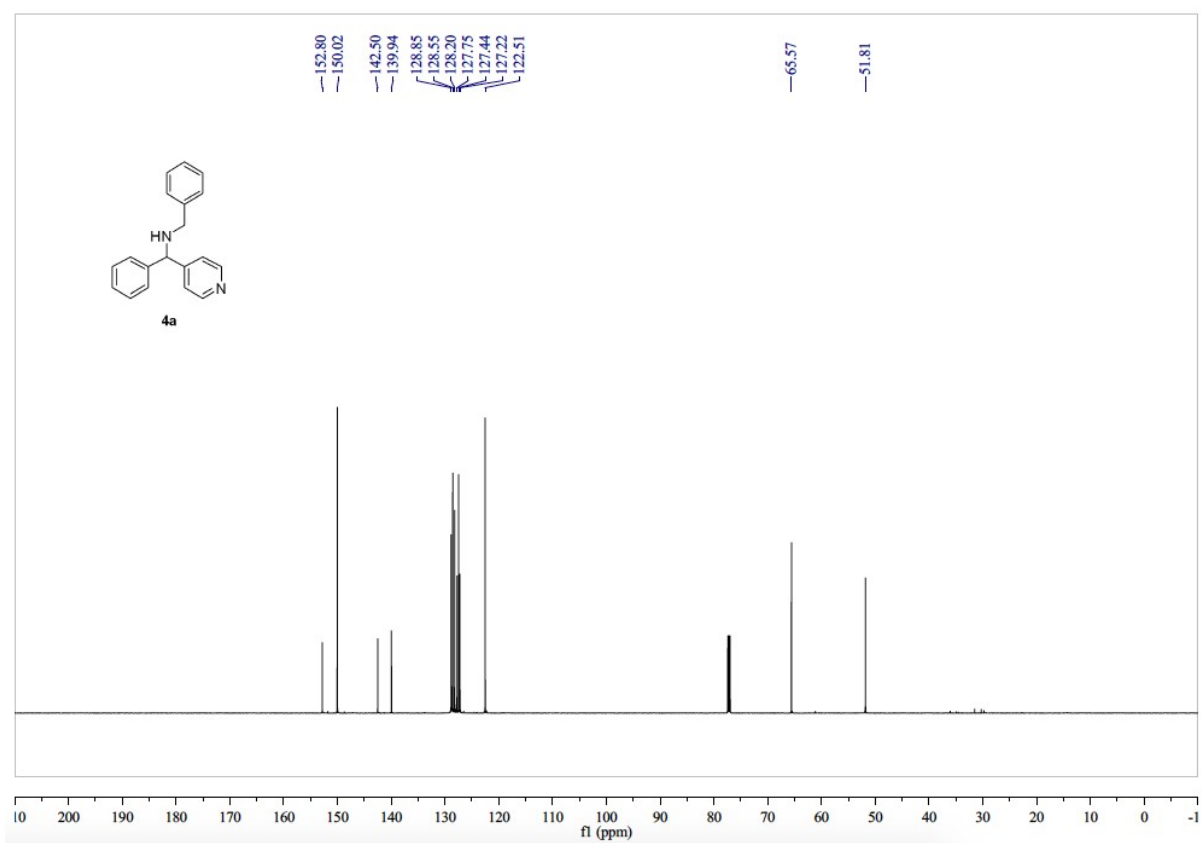

**4b: N-(4-methoxybenzyl)-1-phenyl-1-(pyridin-4-yl)methanamine**

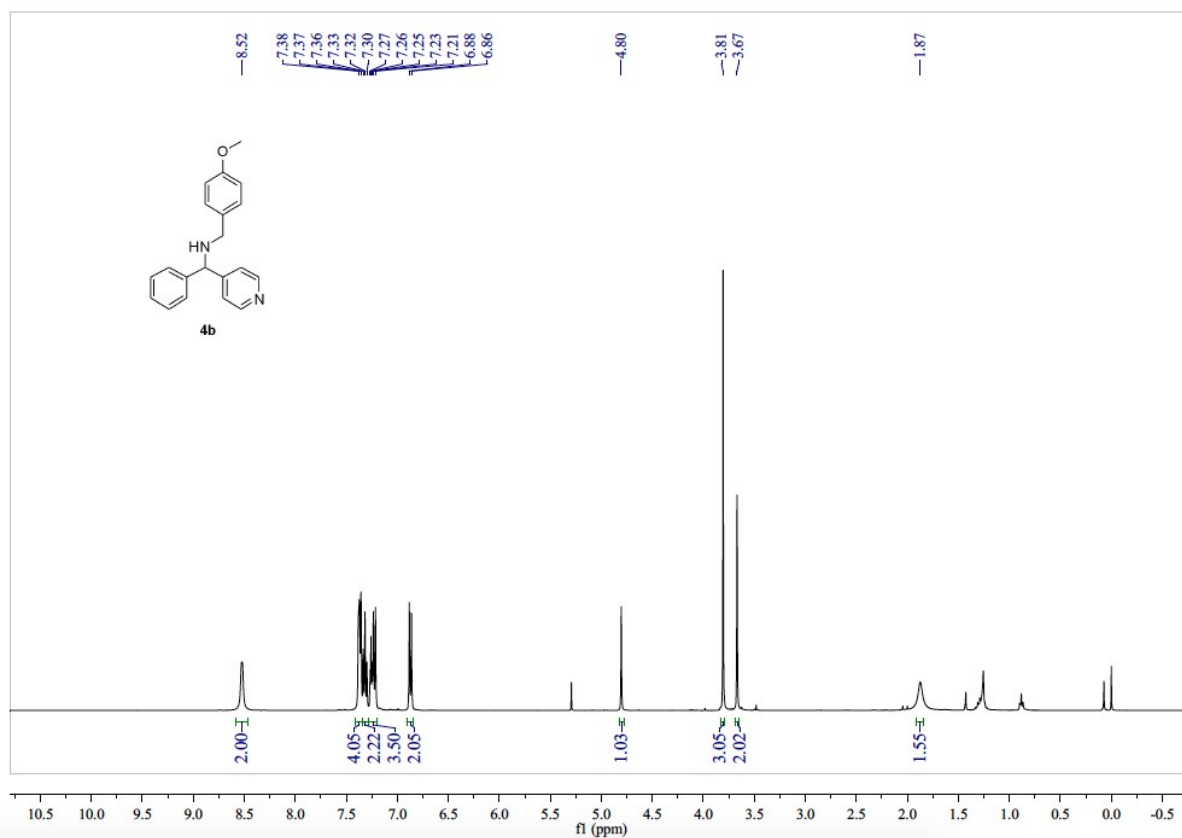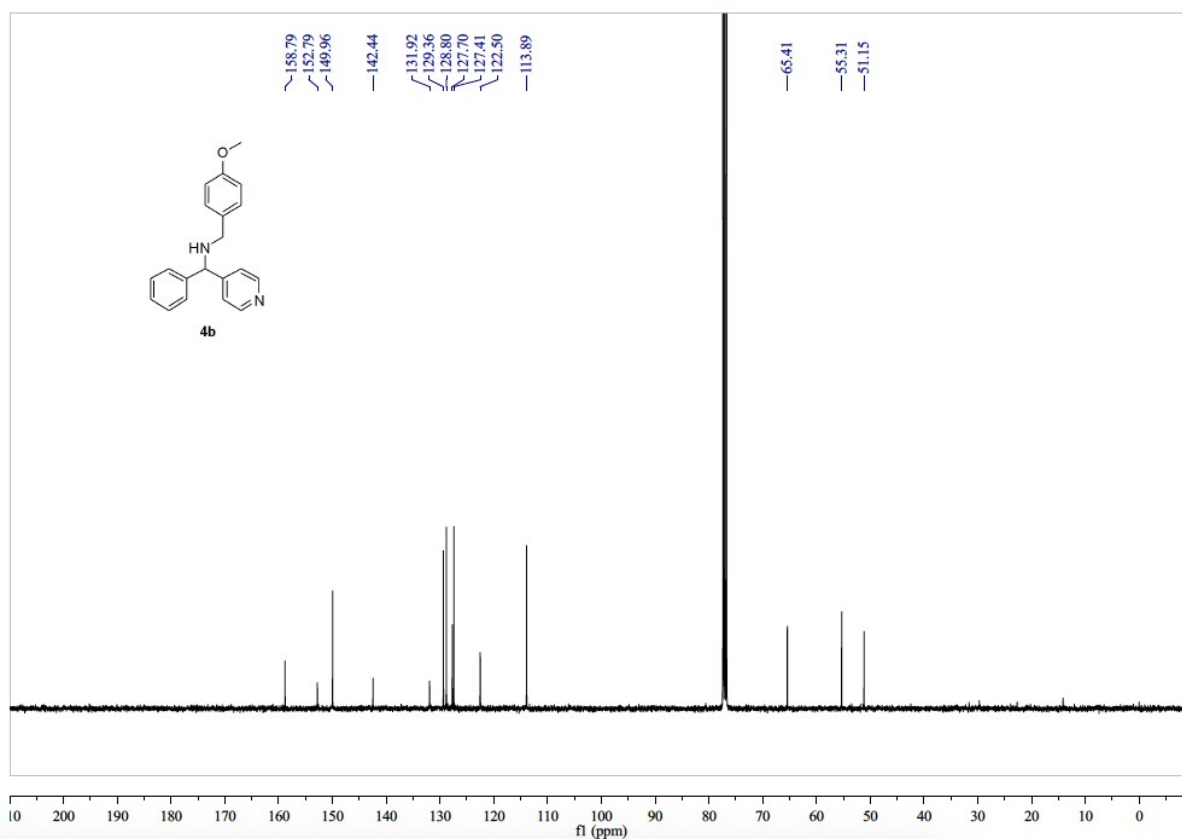

**4c: N-(4-fluorobenzyl)-1-phenyl-1-(pyridin-4-yl)methanamine**

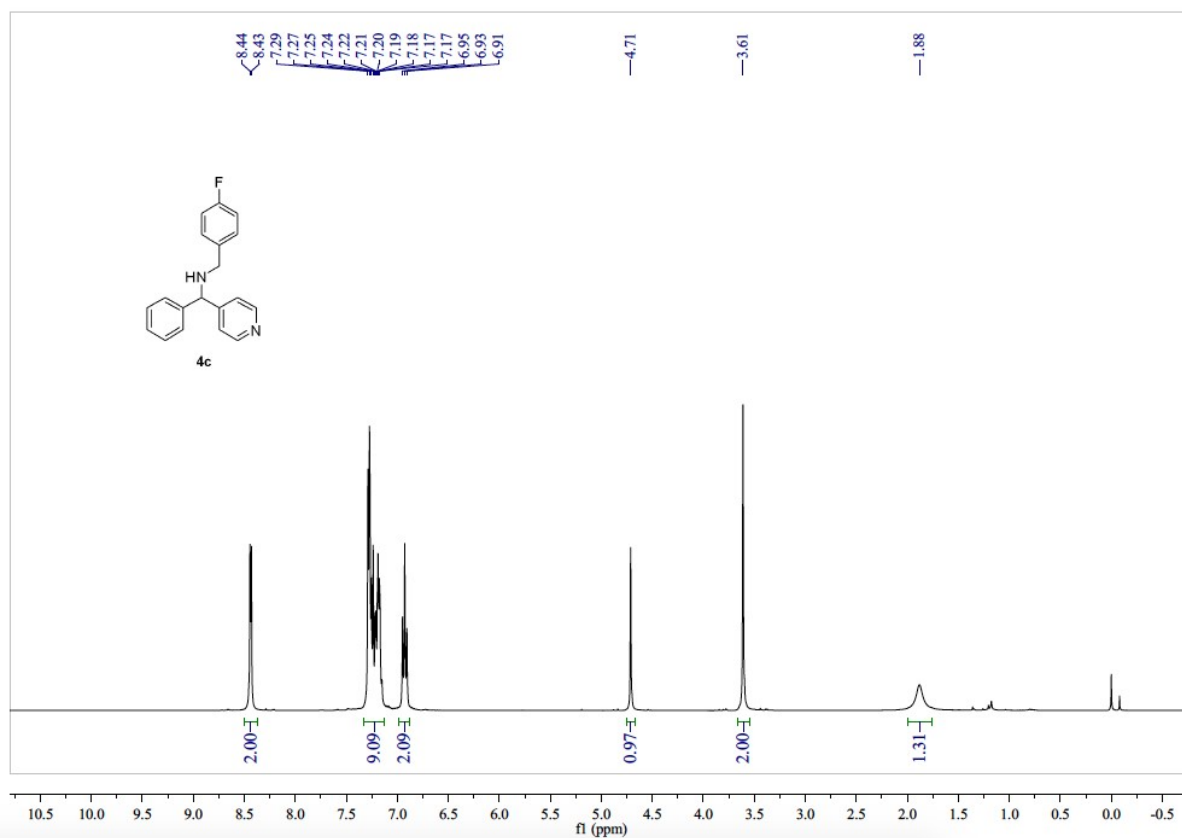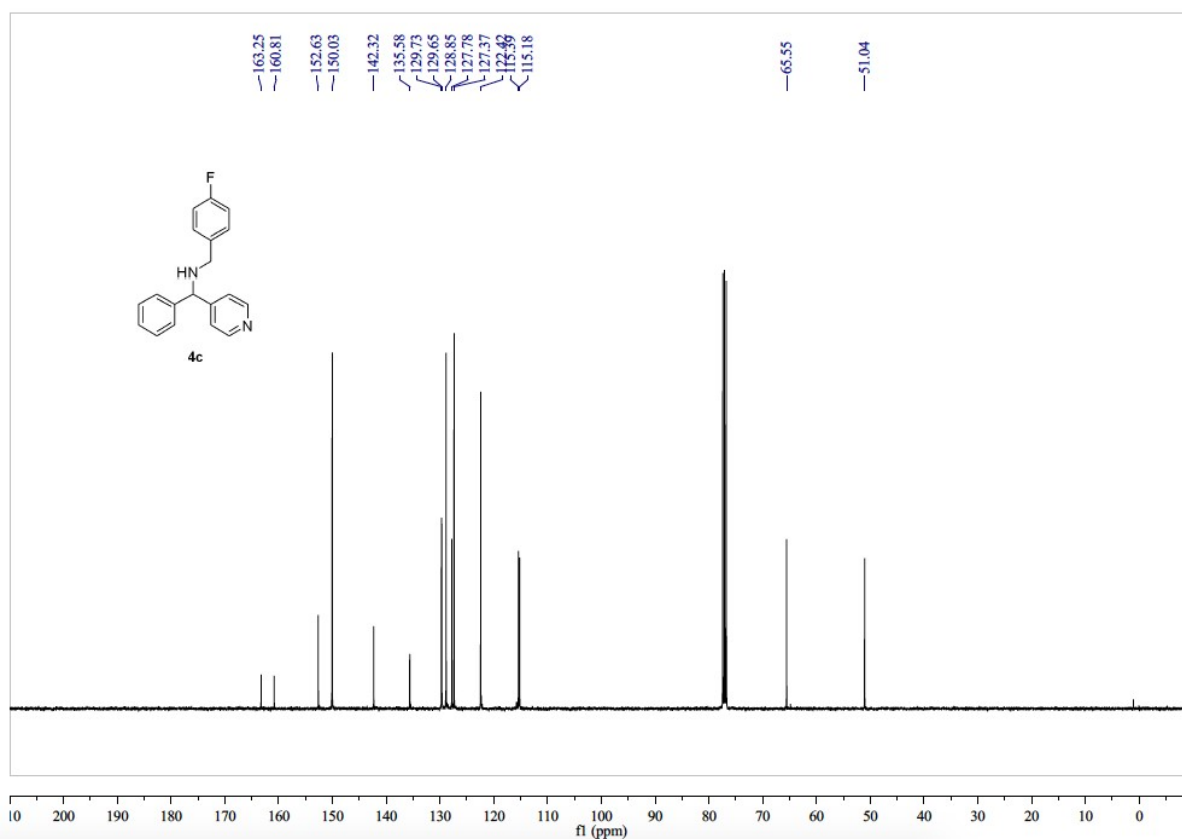

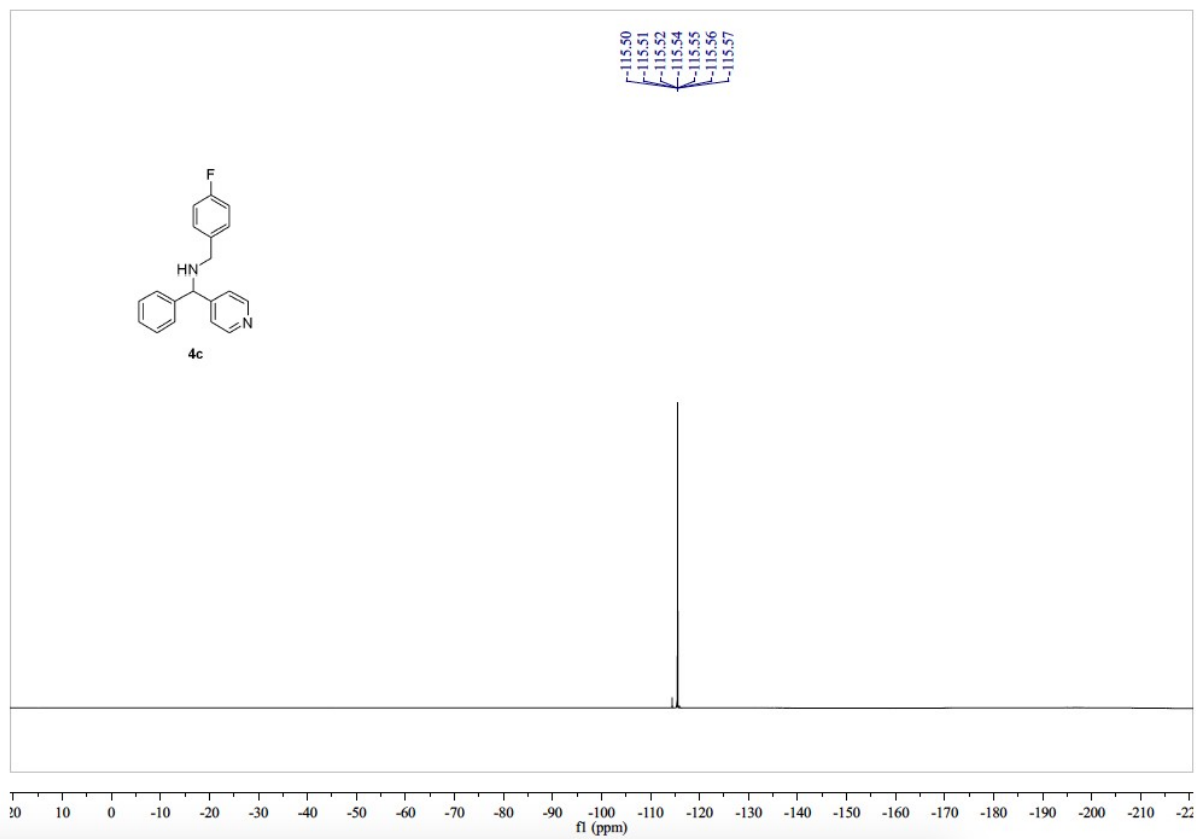

**4d: N-(furan-2-ylmethyl)-1-phenyl-1-(pyridin-4-yl)methanamine**

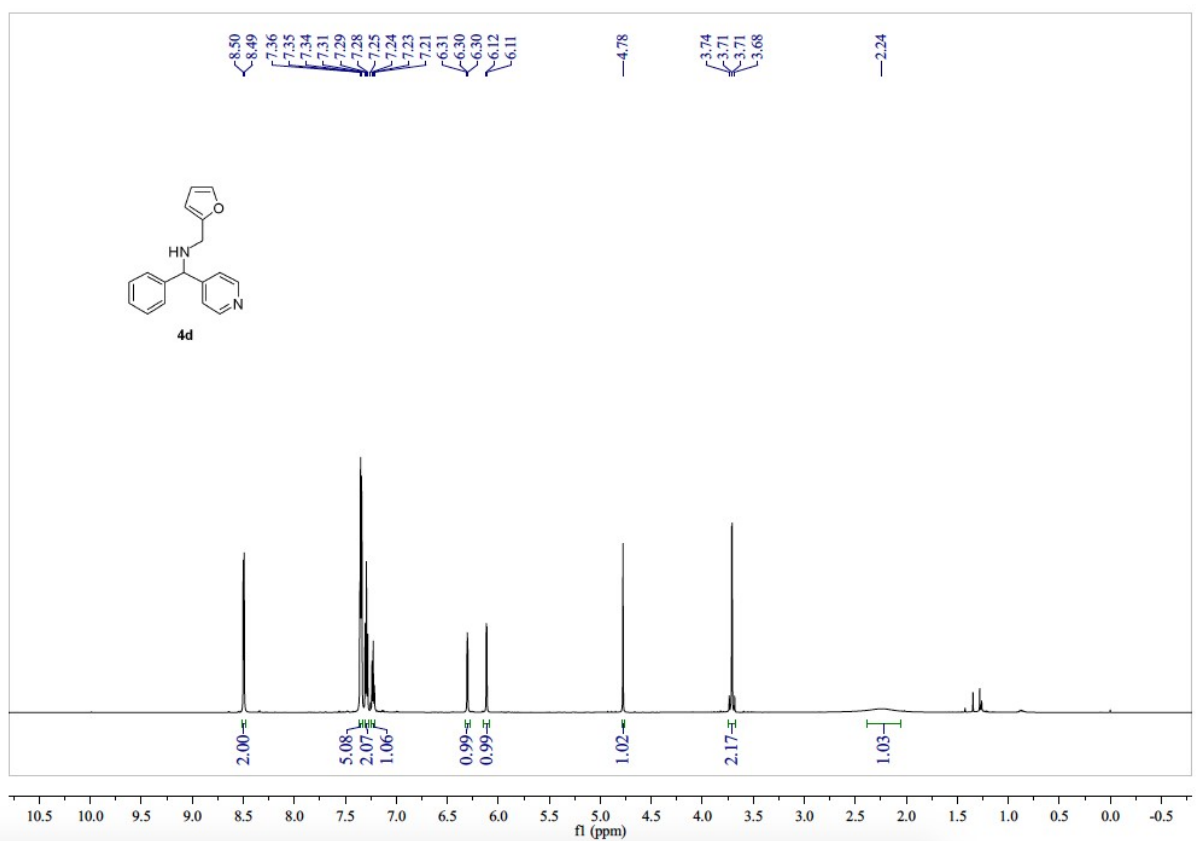

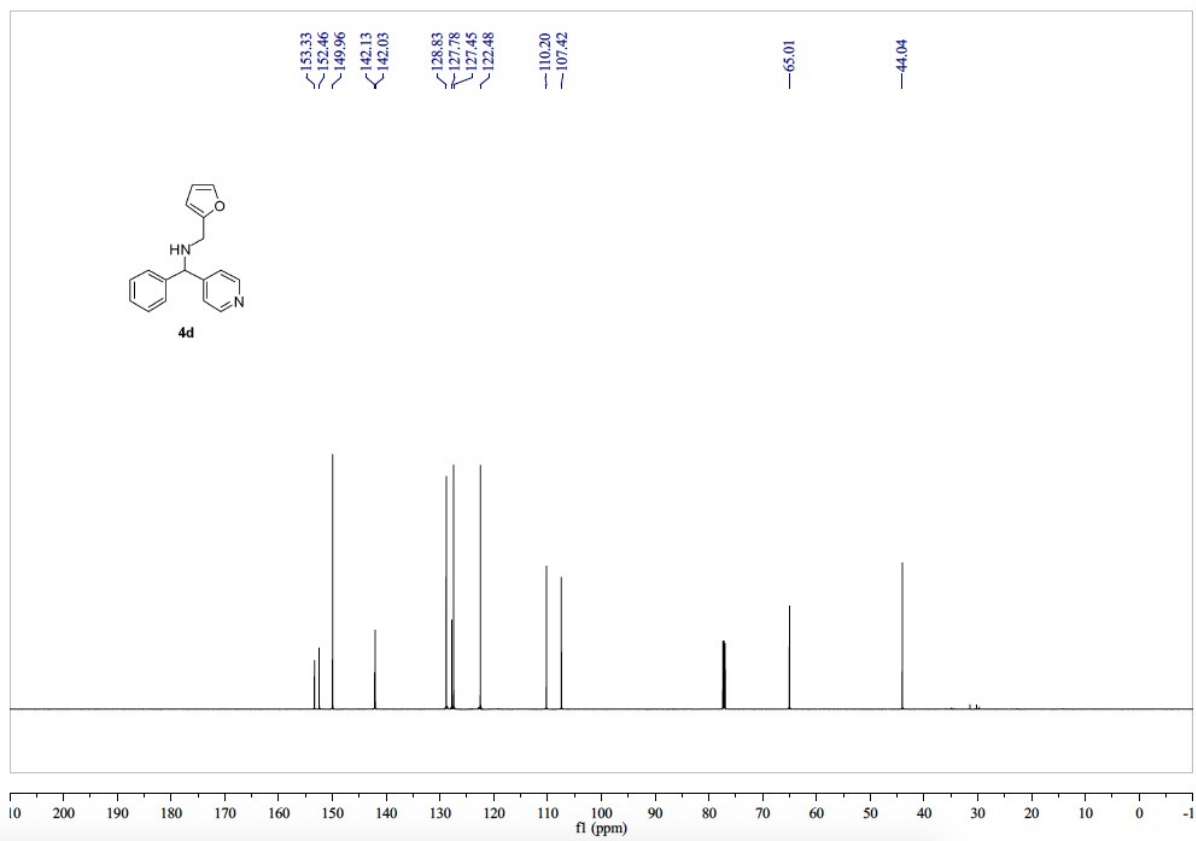

**4e: 1-phenyl-N-(phenyl(pyridin-4-yl)methyl)ethan-1-amine**

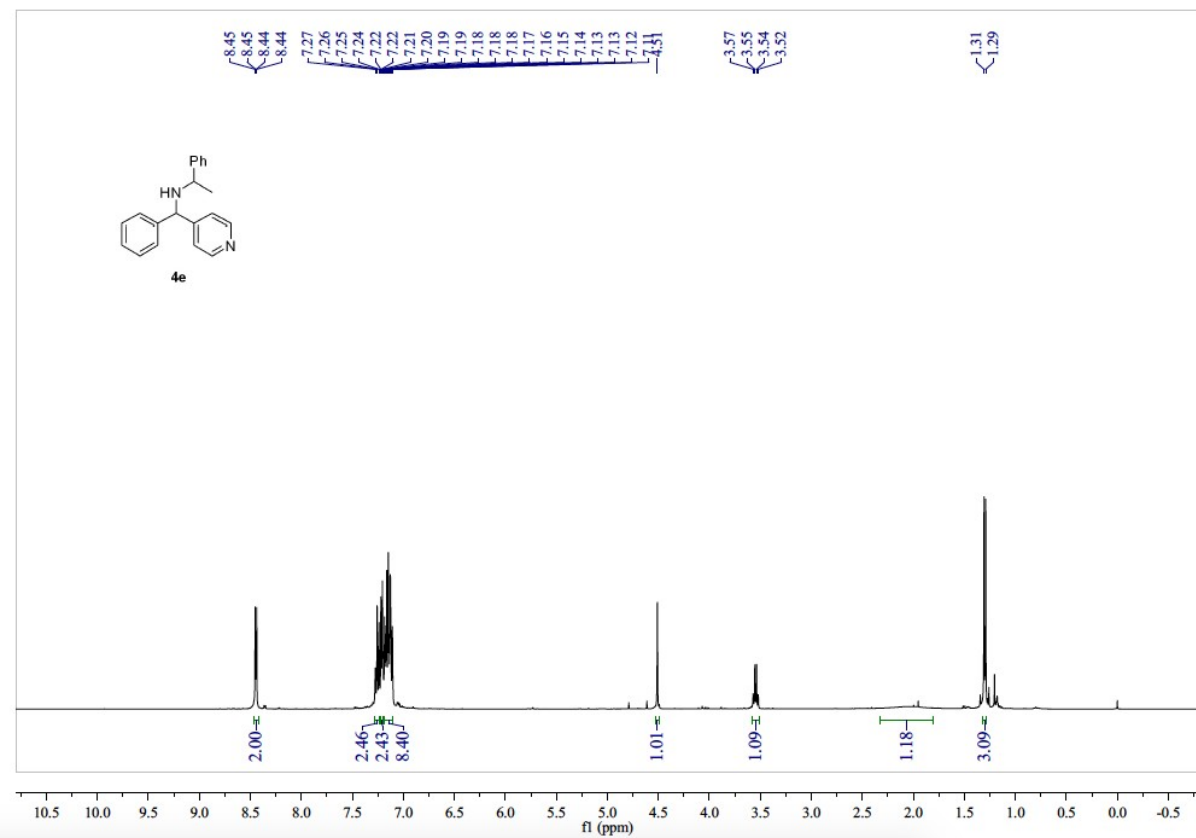



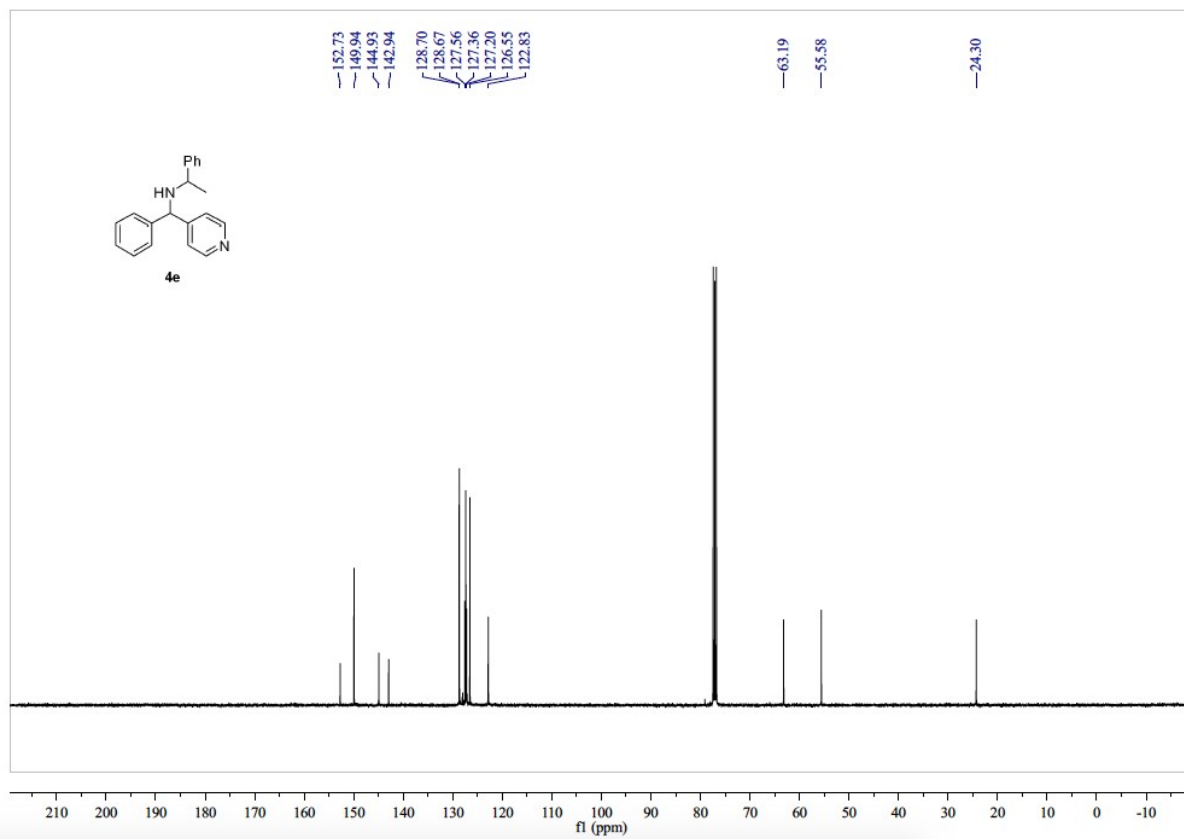

**4f: N-benzhydryl-1-phenyl-1-(pyridin-4-yl)methanamine**

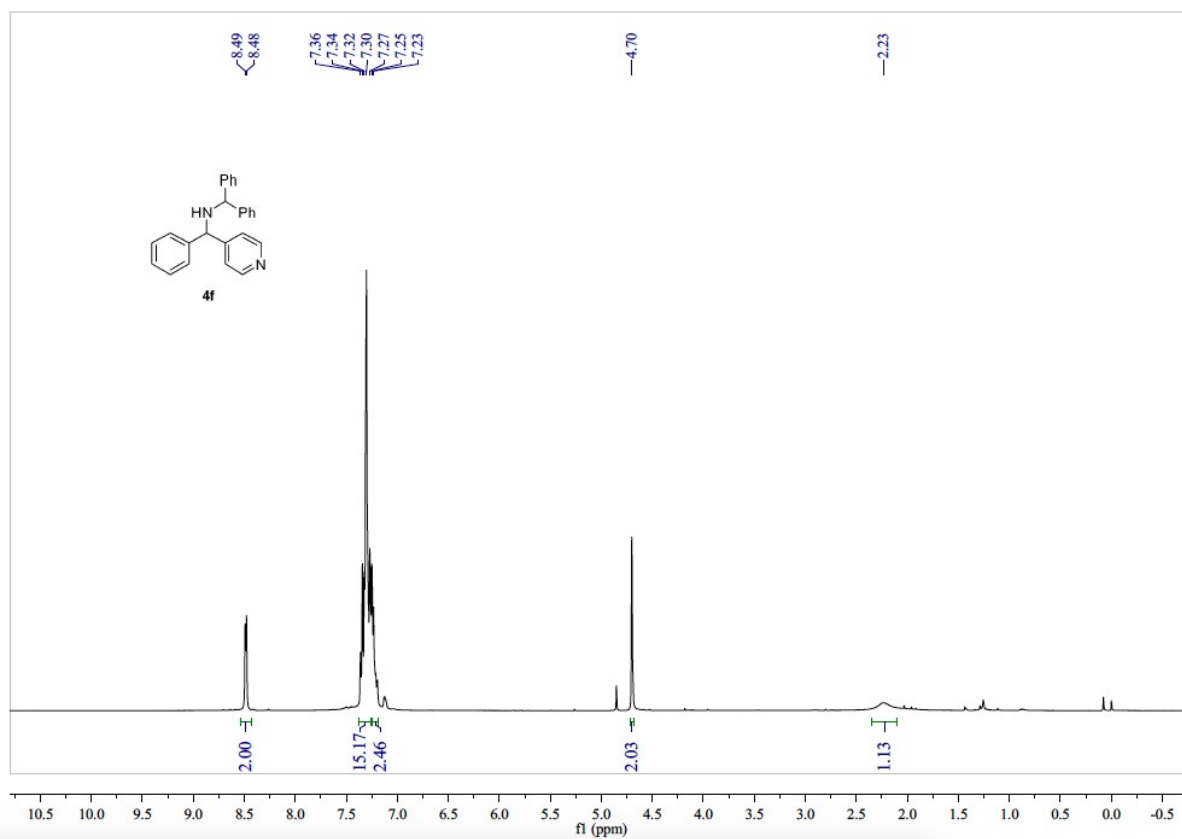

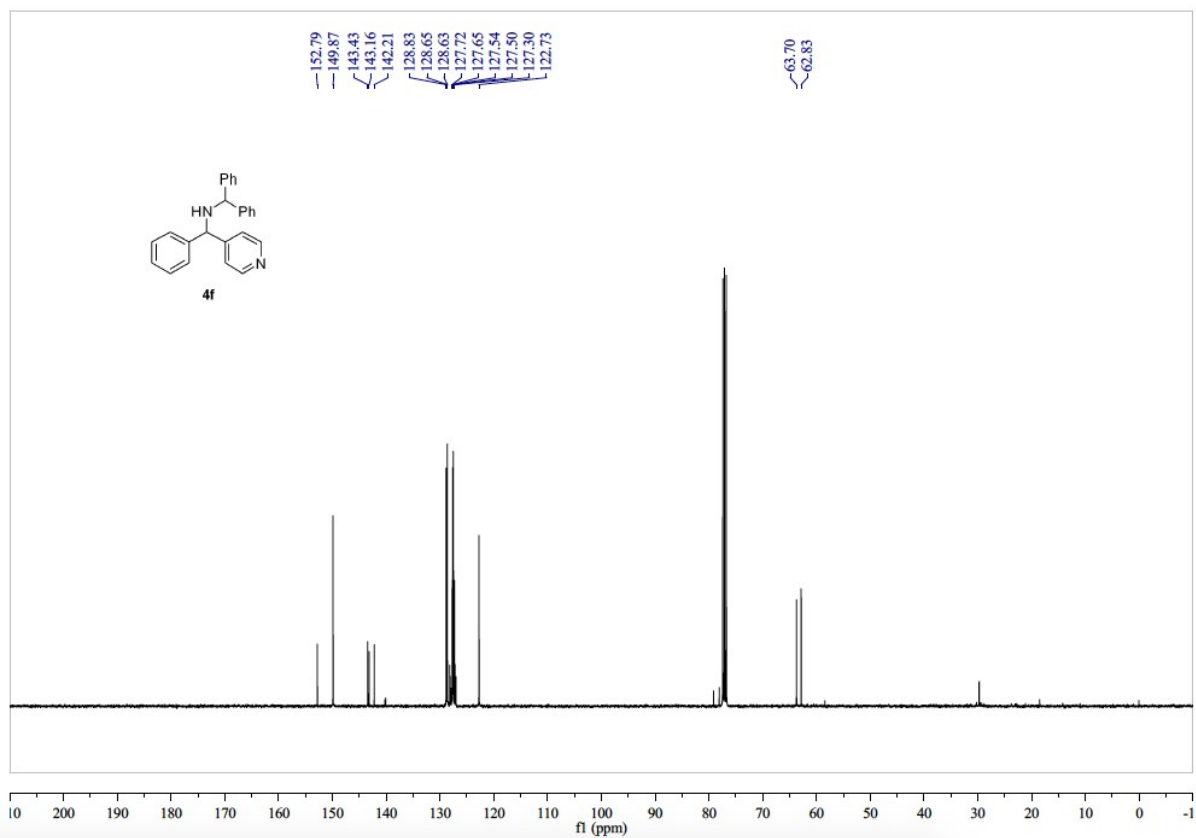

**4g**: *N*-(phenyl(pyridin-4-yl)methyl)-2,3-dihydro-1*H*-inden-1-amine

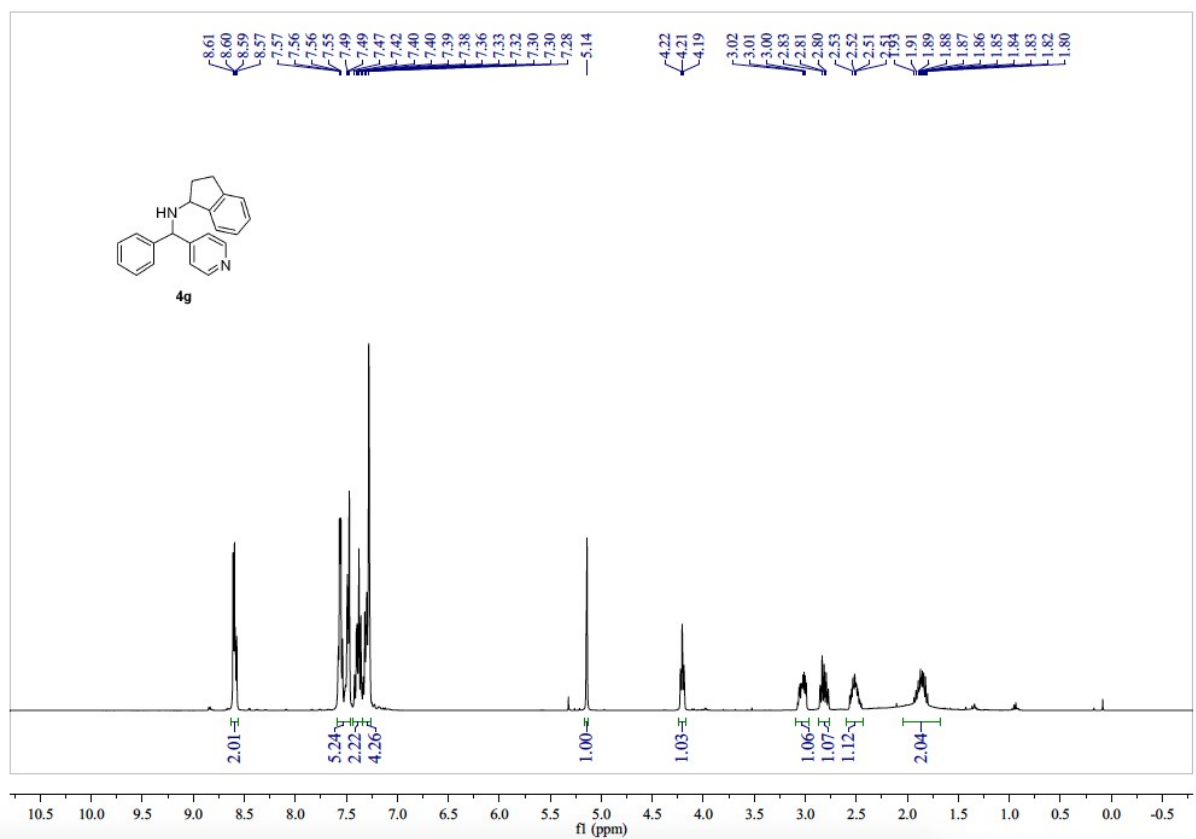

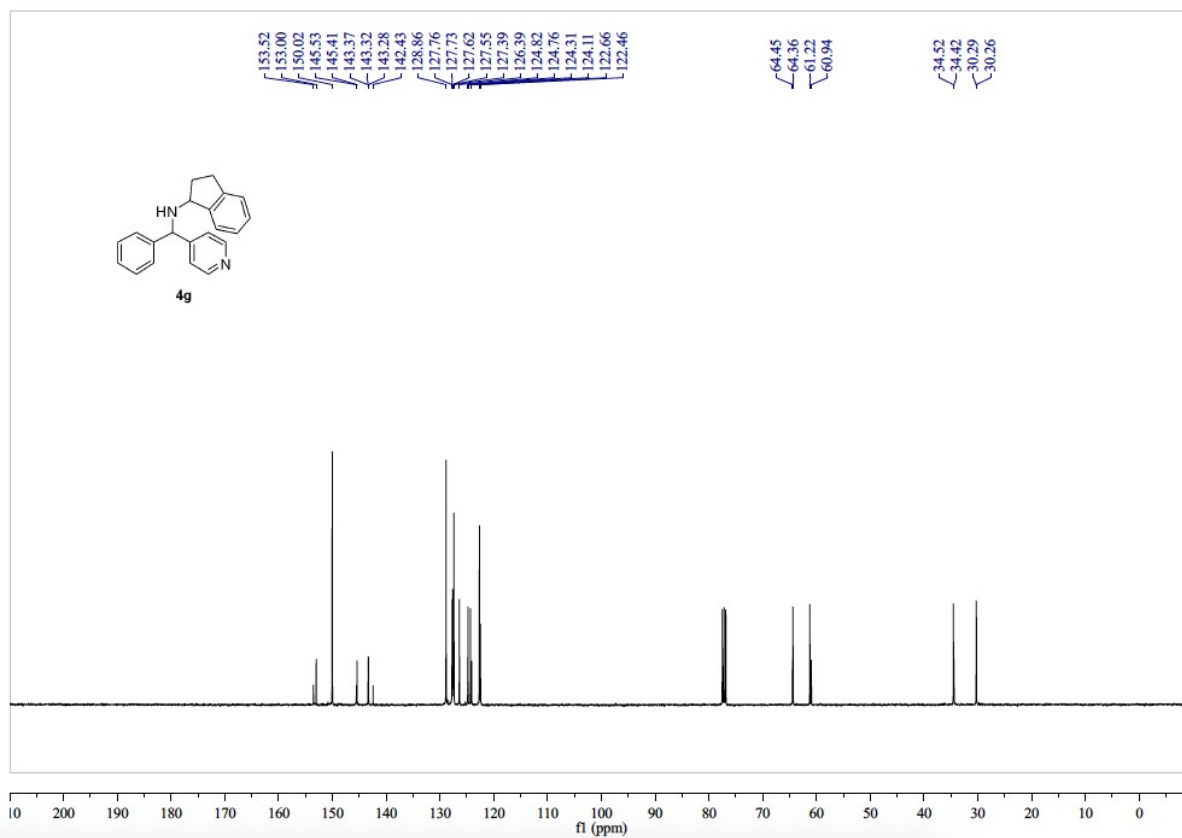

**4h: 4-(2-((phenyl(pyridin-4-yl)methyl)amino)ethyl)phenol**

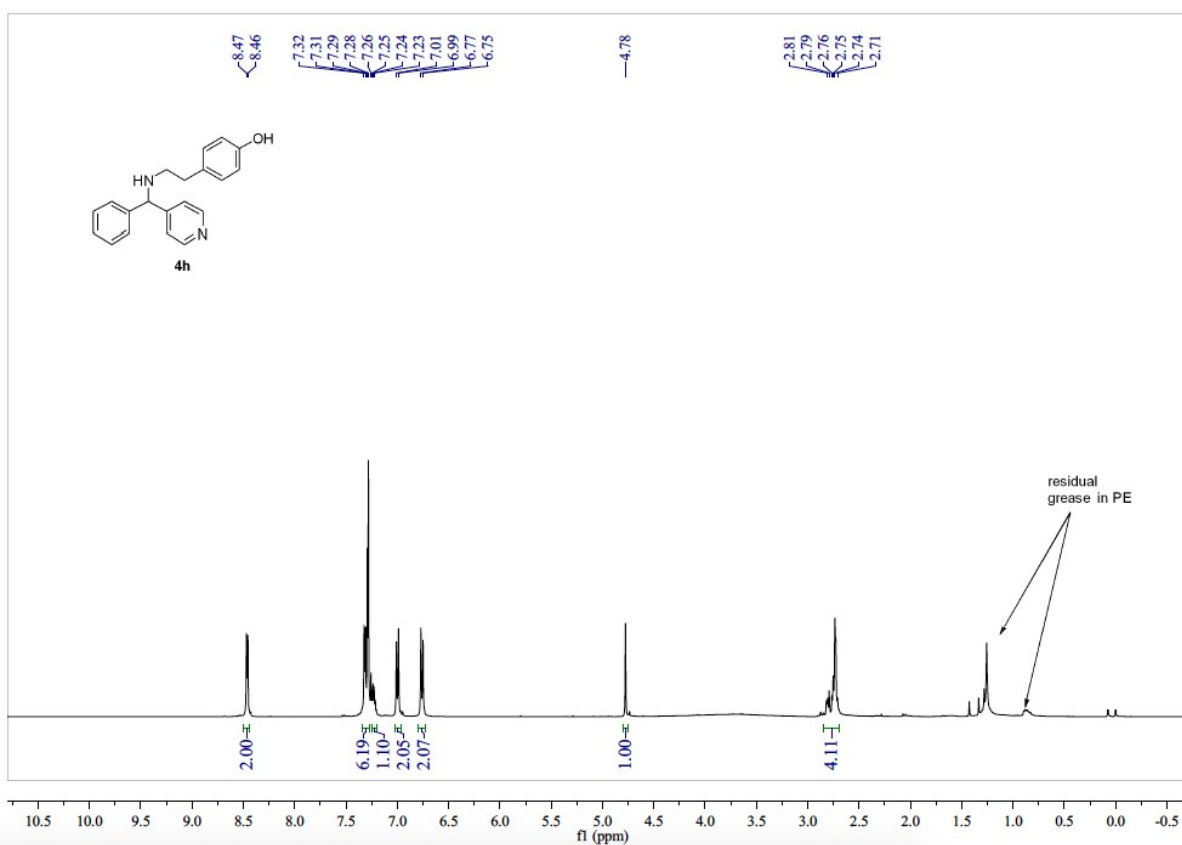

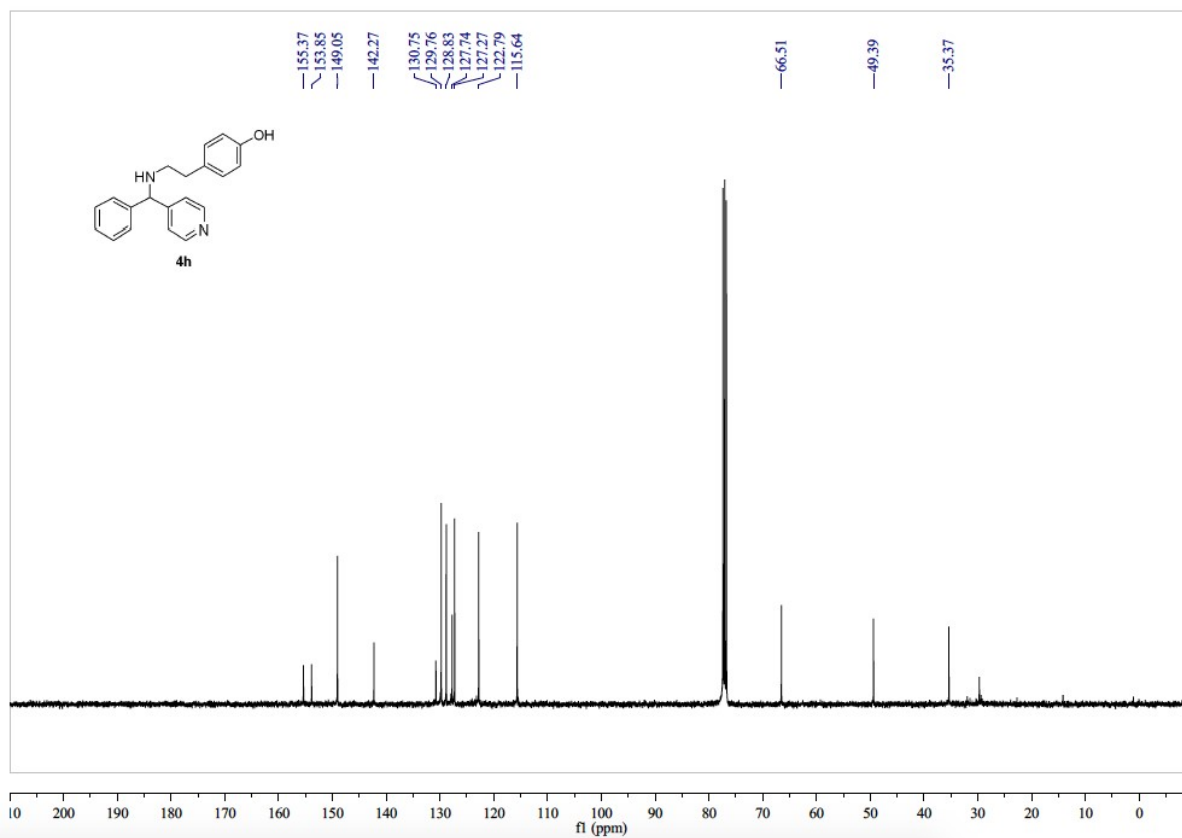

**4i: 2-(1*H*-indol-3-yl)-*N*-(phenyl(pyridin-4-yl)methyl)ethan-1-amine**

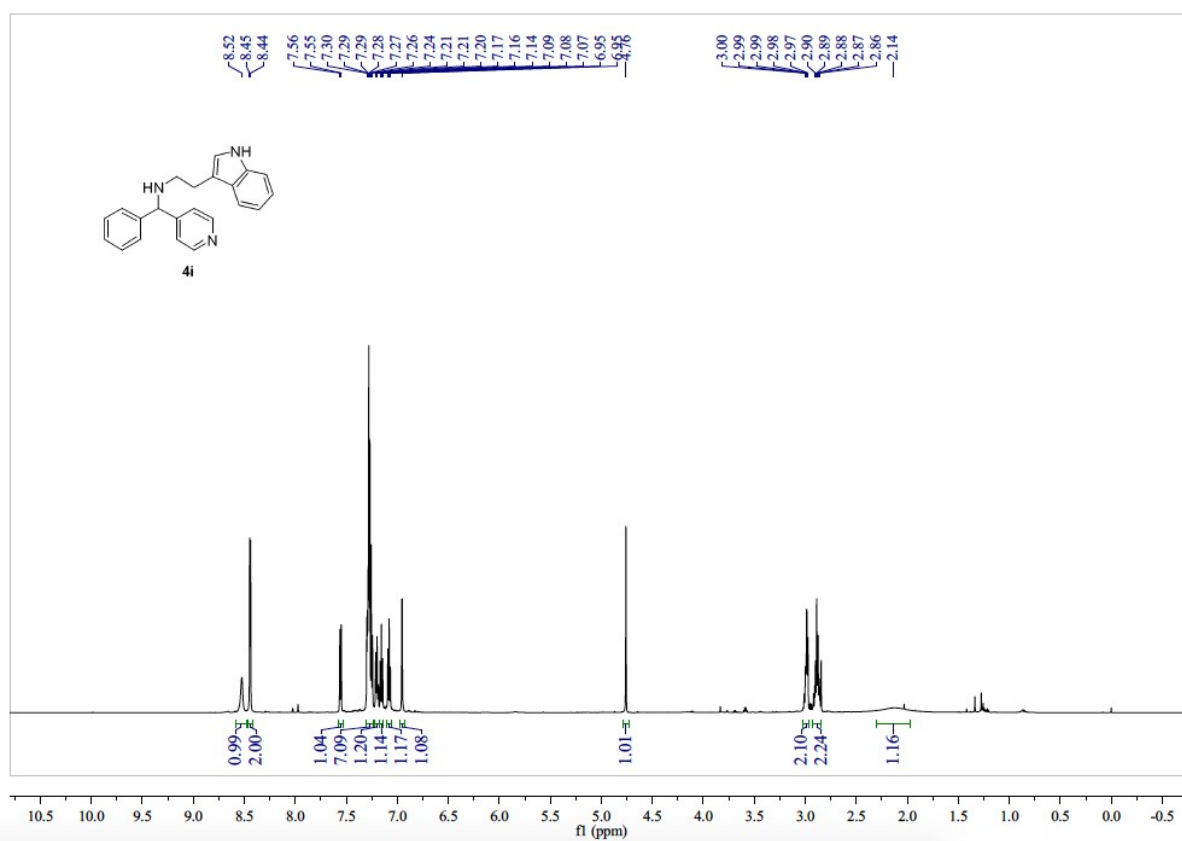

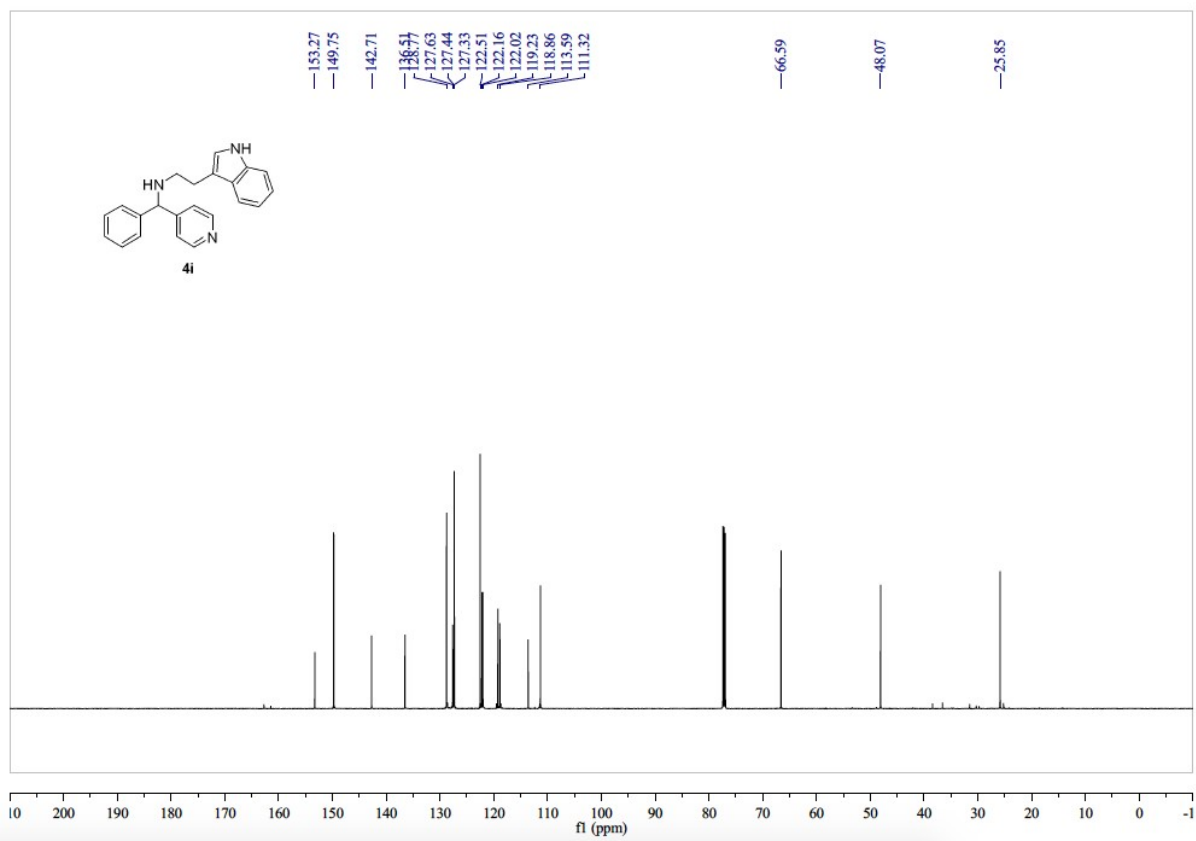

**4j: N-(phenyl(pyridin-4-yl)methyl)butan-1-amine**

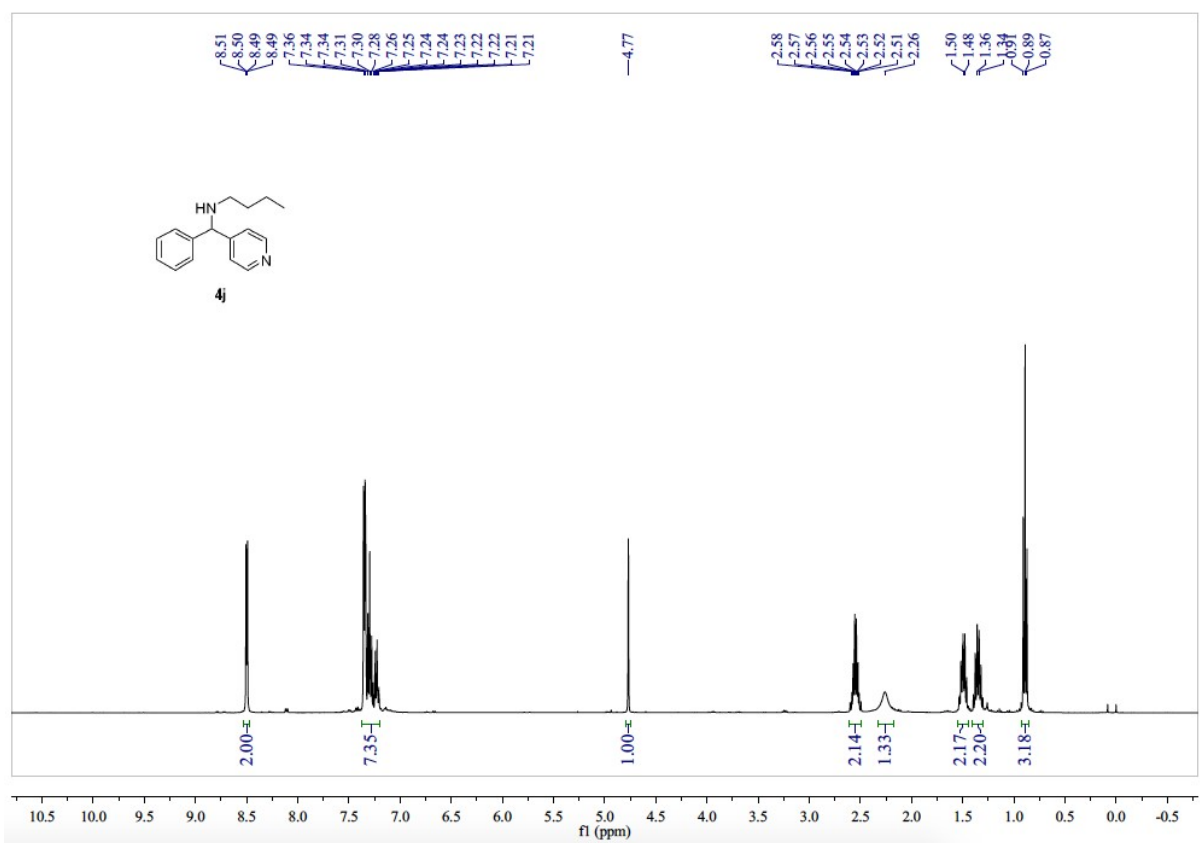

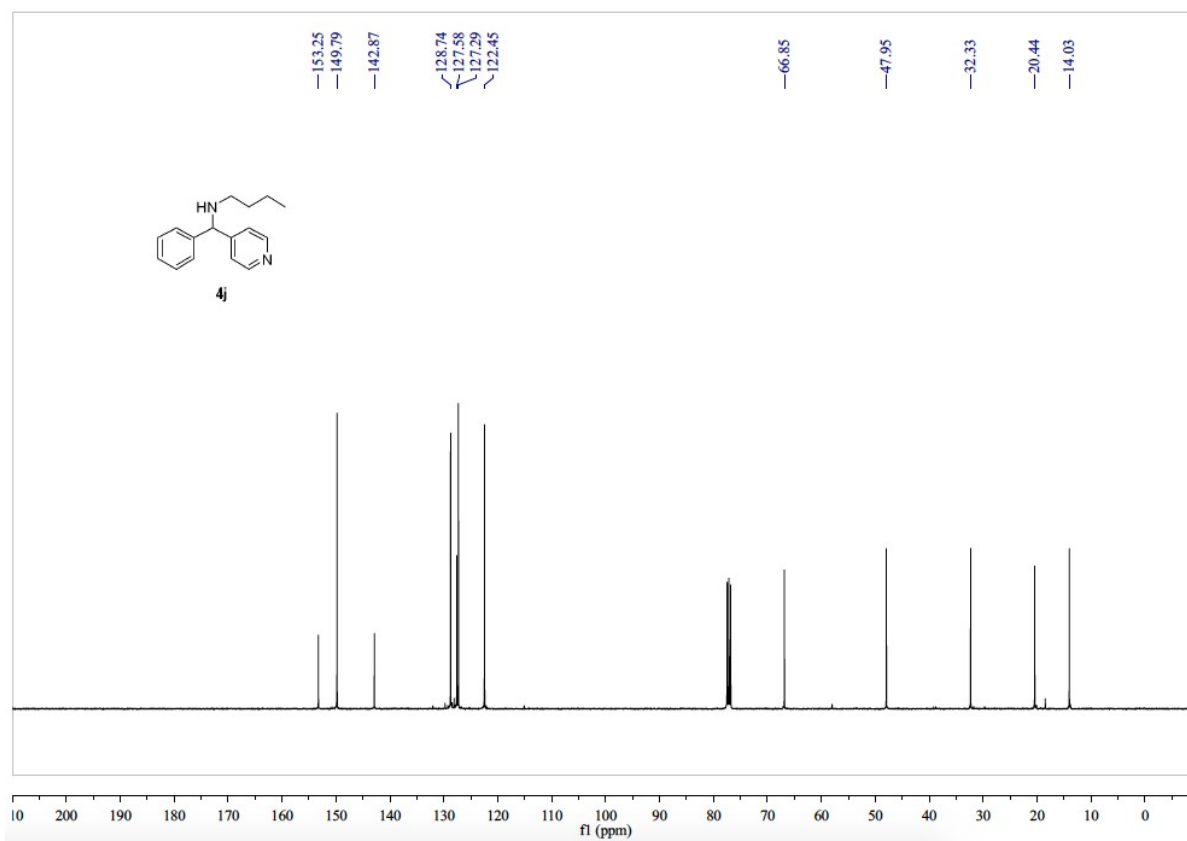

**4k: 2,2-dimethyl-N-(phenyl(pyridin-4-yl)methyl)propan-1-amine**

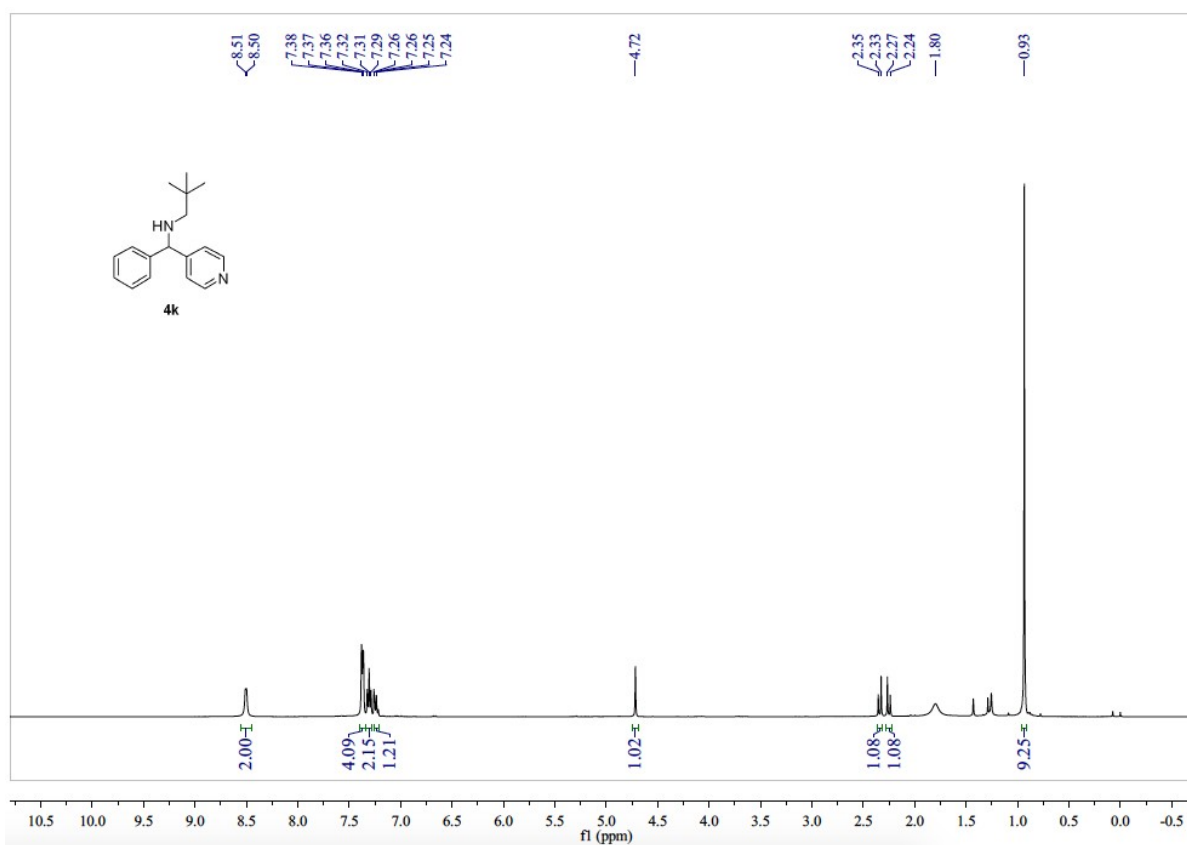

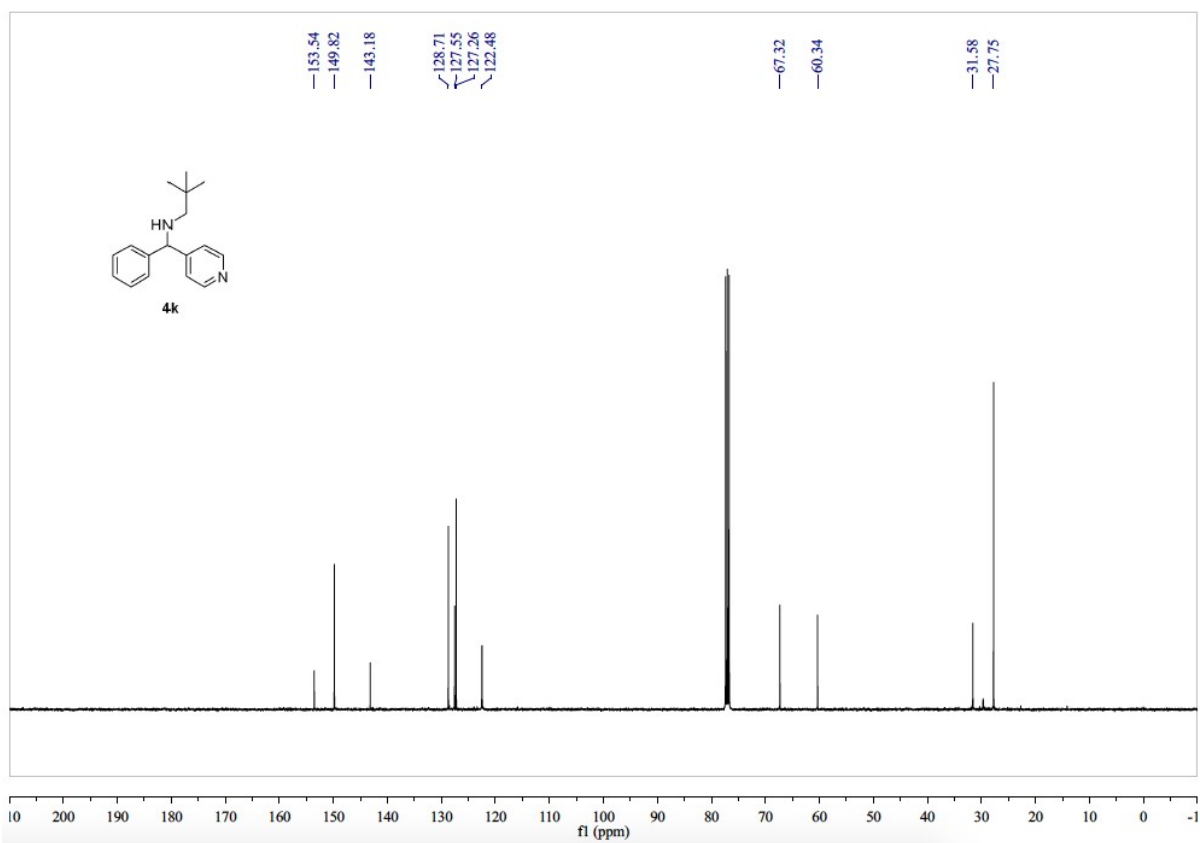

**4l: *N*-(phenyl(pyridin-4-yl)methyl)cyclopropanamine**

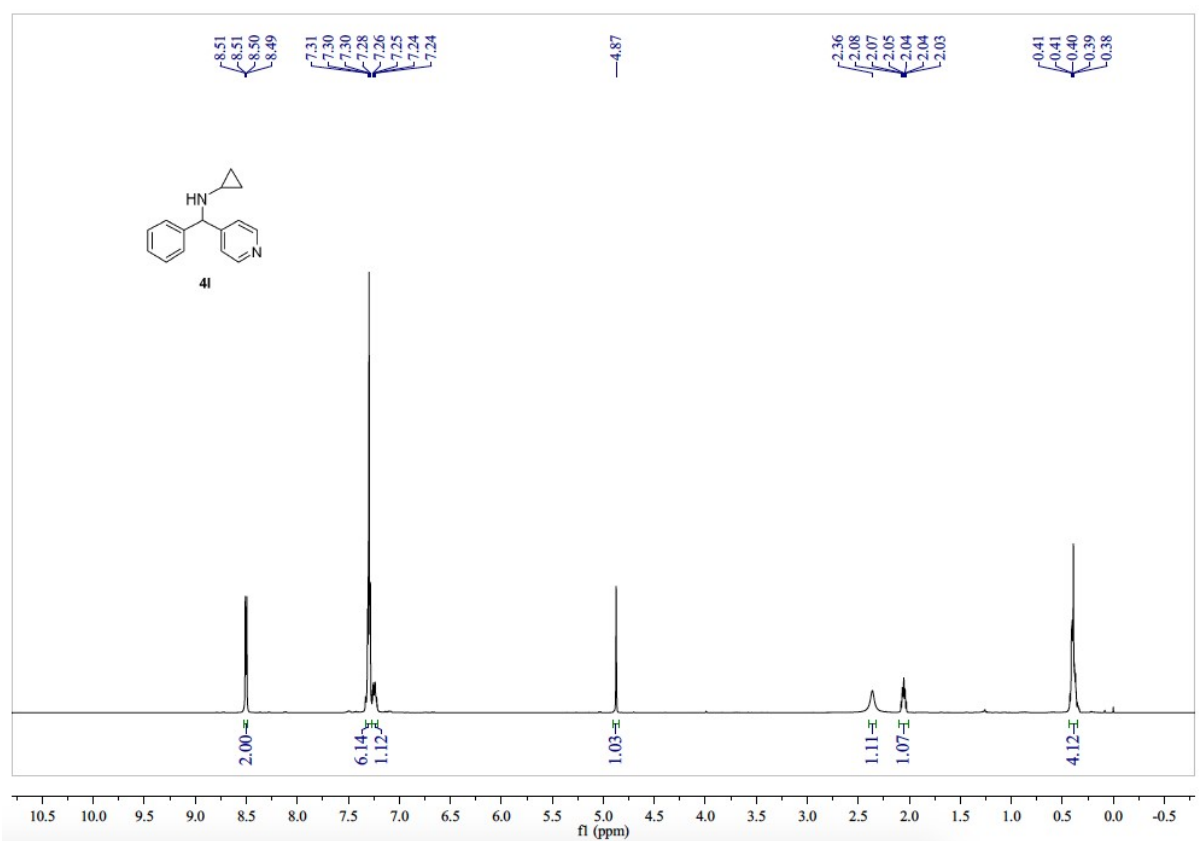

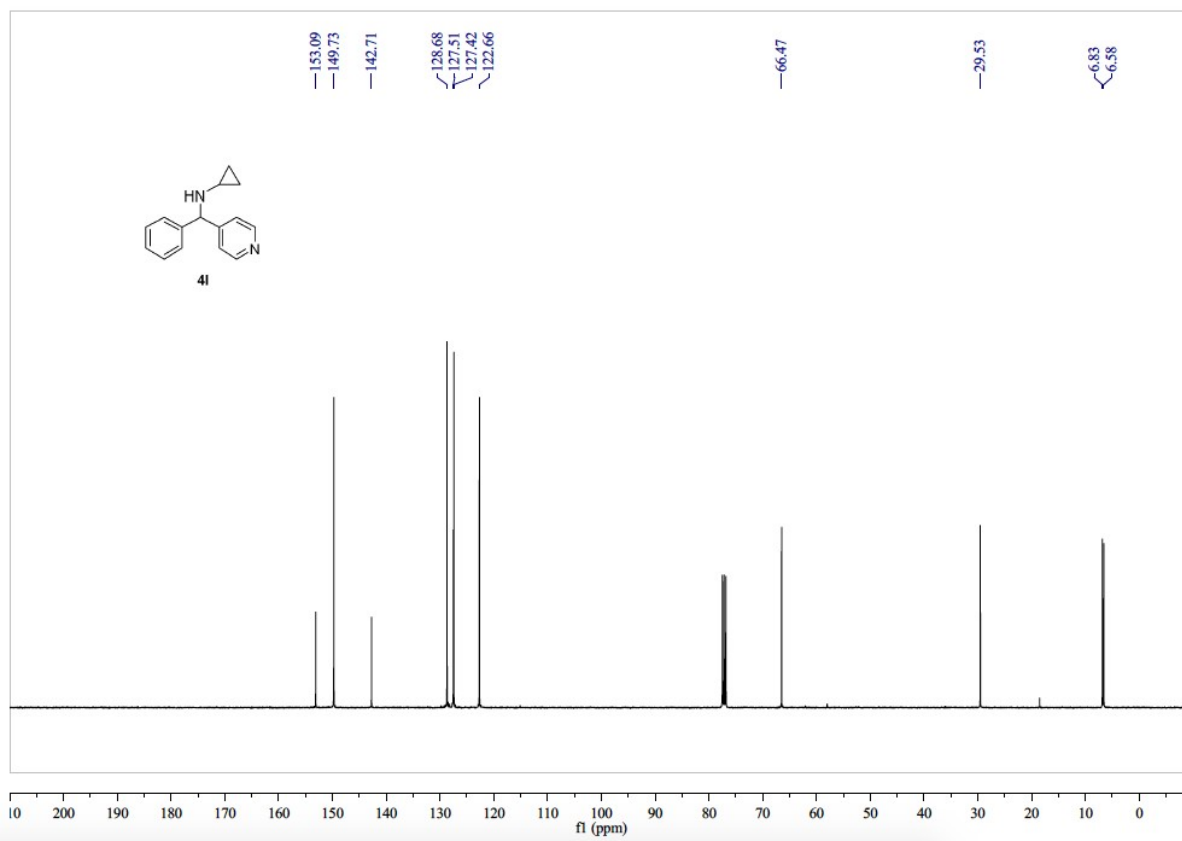

**4m: N-(phenyl(pyridin-4-yl)methyl)cyclohexanamine**

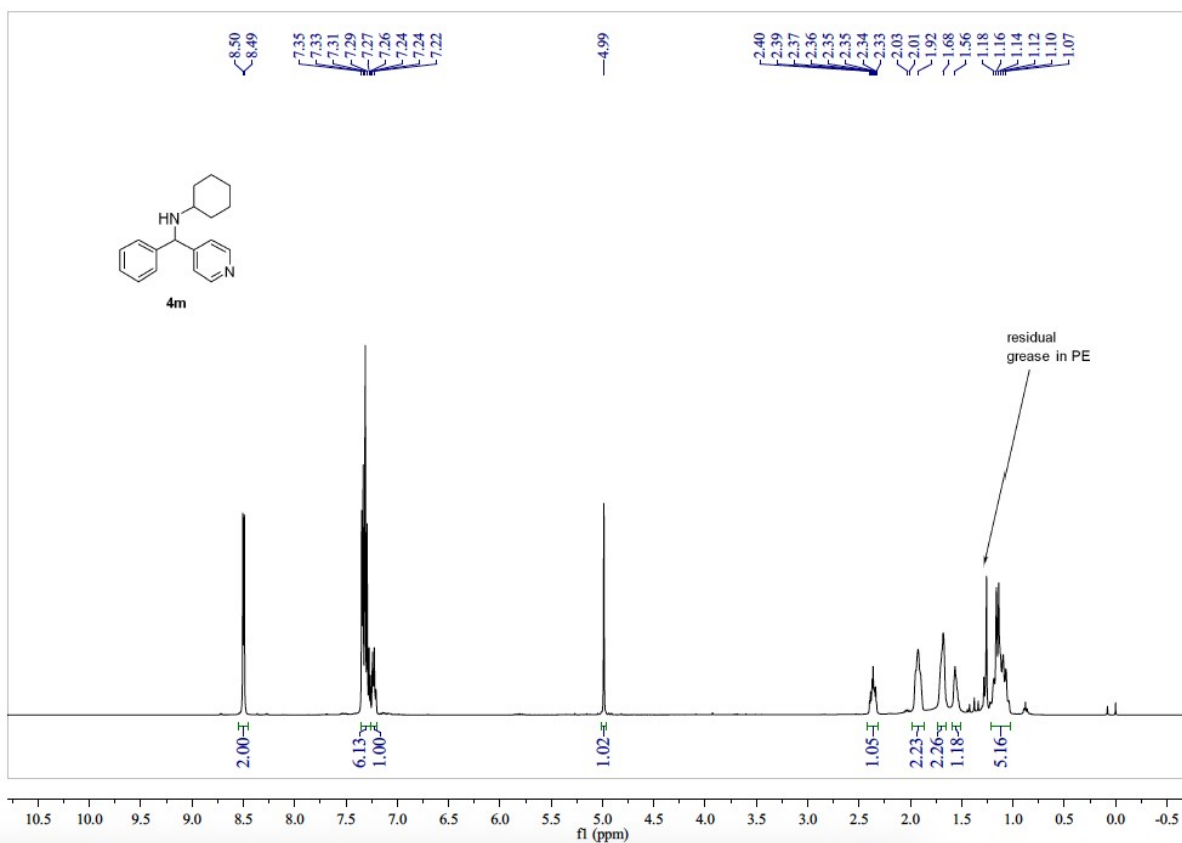



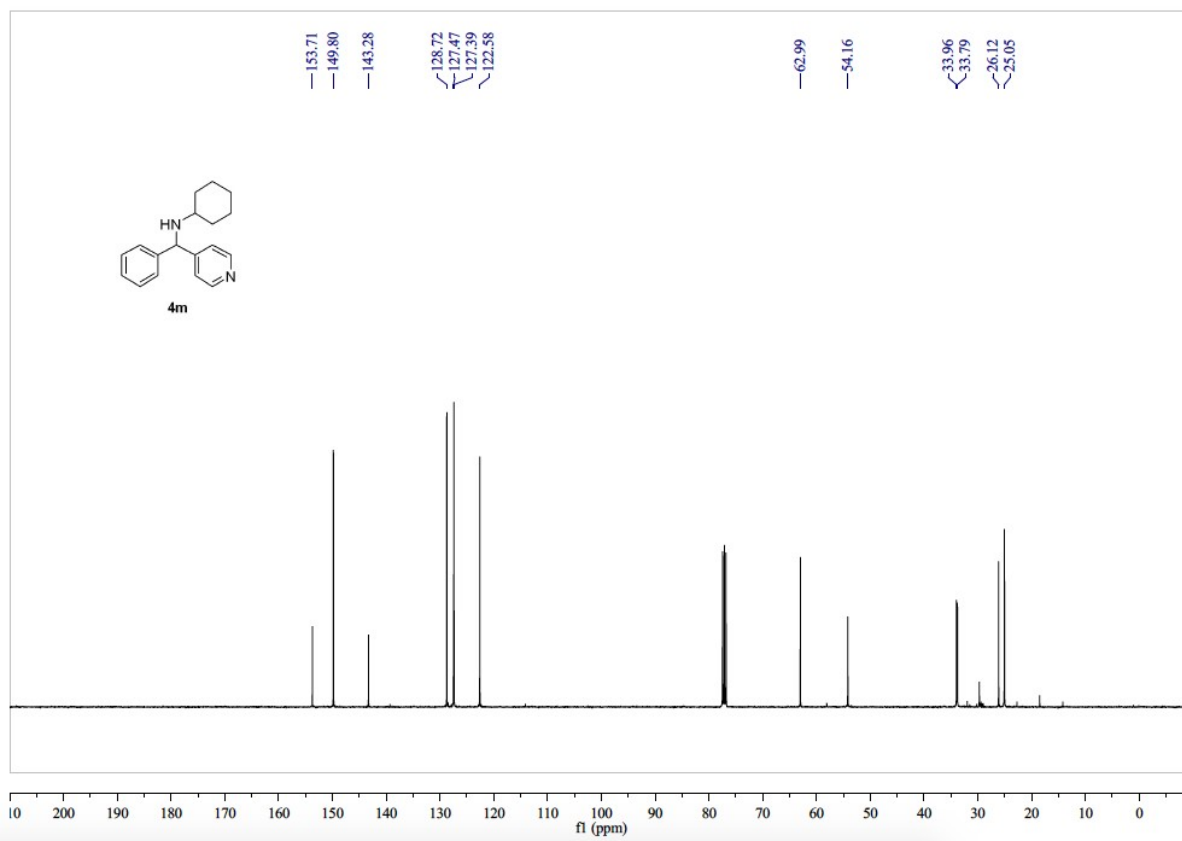

**4n: 2,4,4-trimethyl-N-(phenyl(pyridin-4-yl)methyl)pentan-2-amine**

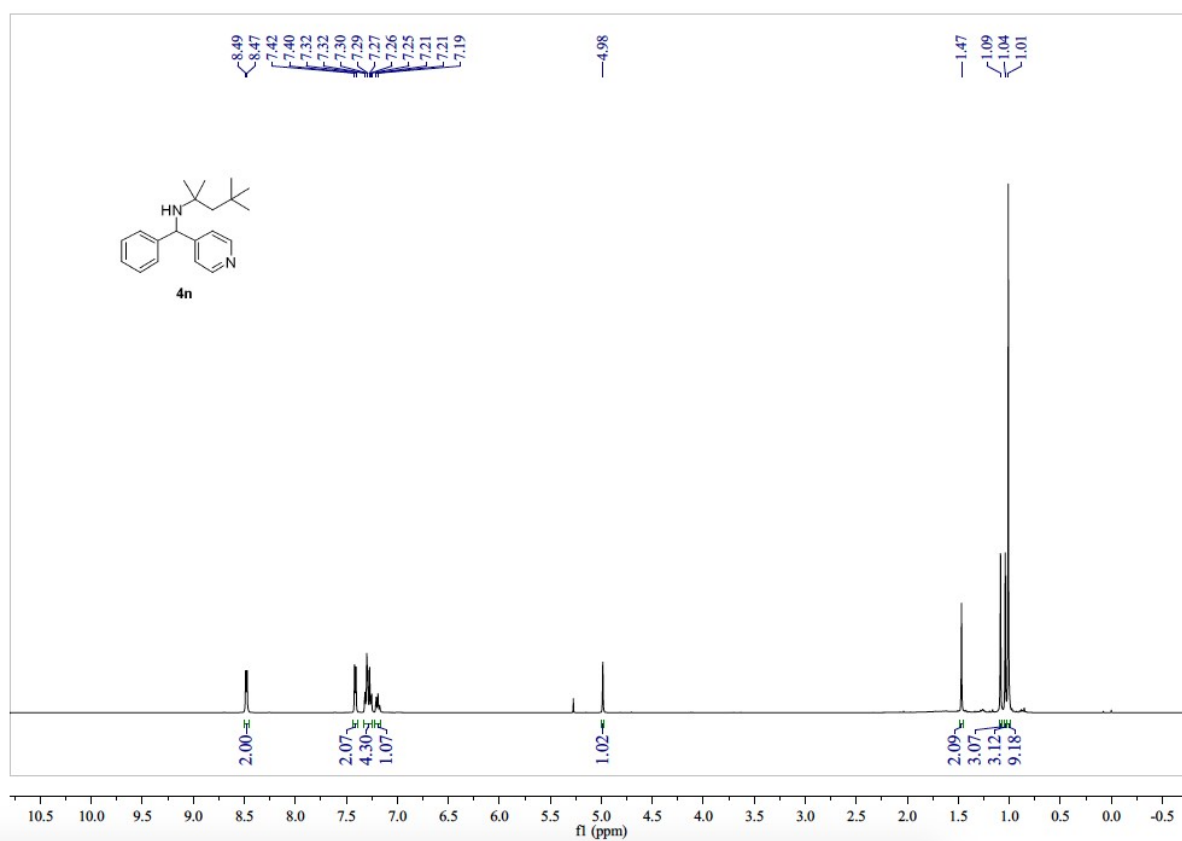

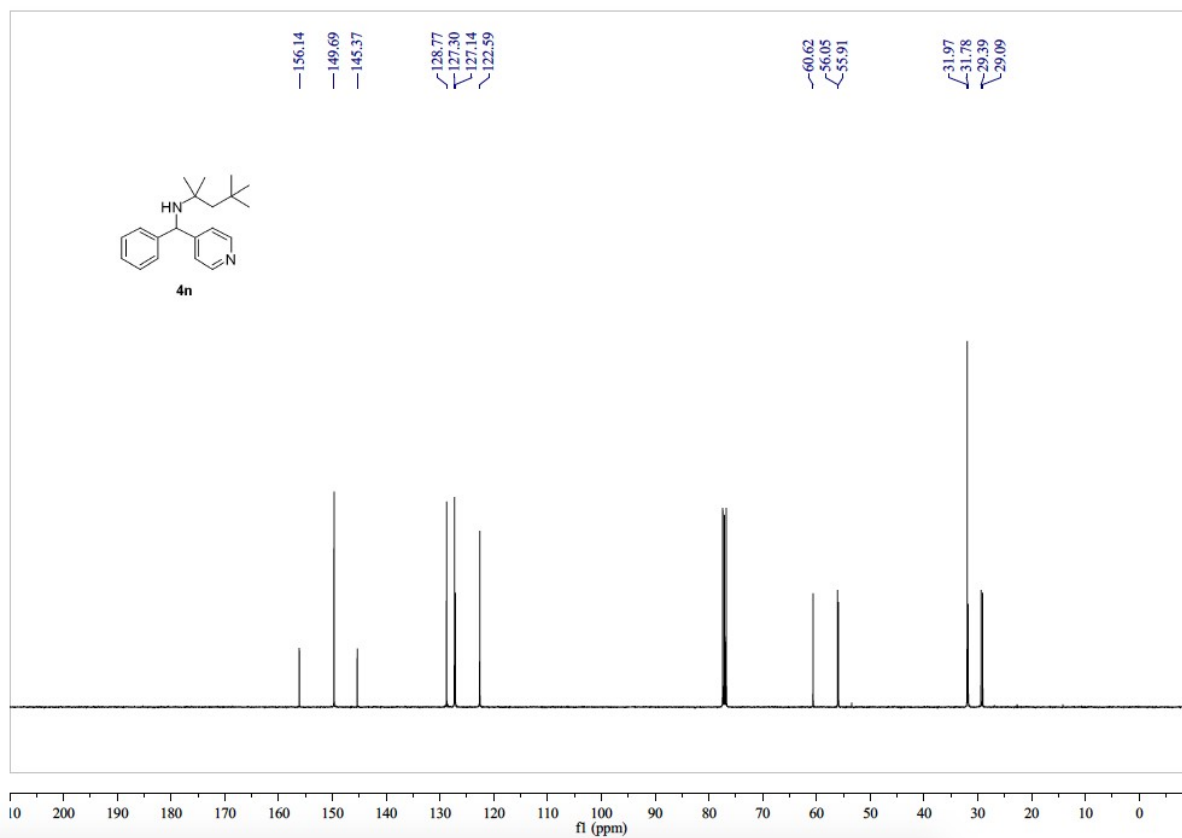

**4o: N-(phenyl(pyridin-4-yl)methyl)adamantan-1-amine**

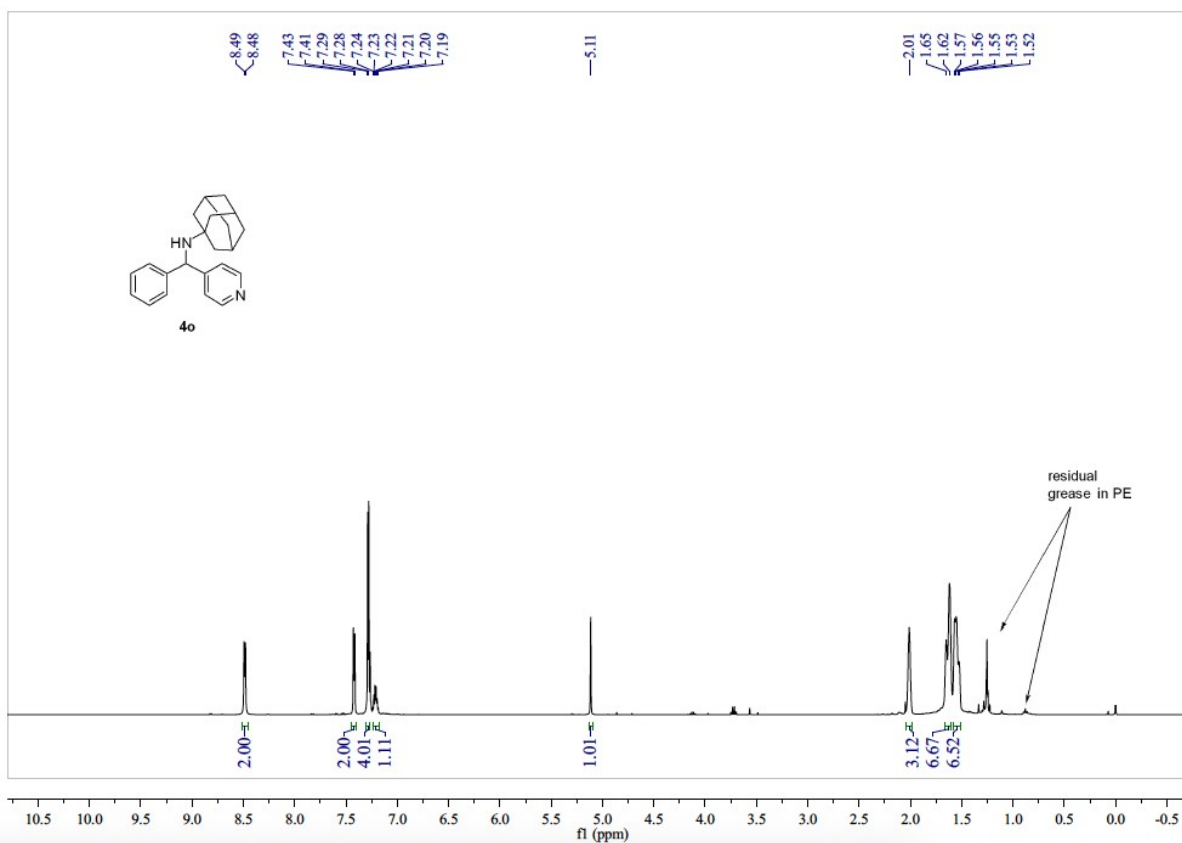

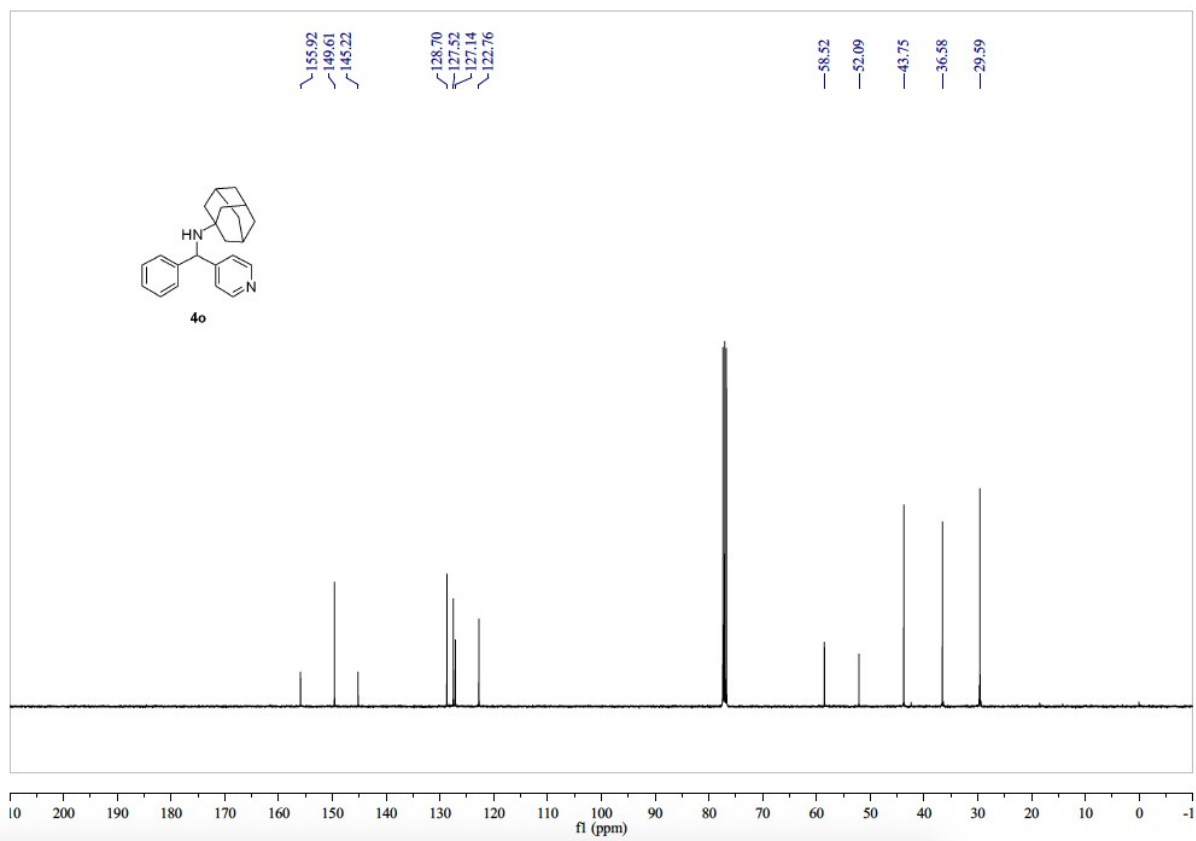

**4p: N-(phenyl(pyridin-4-yl)methyl)prop-2-en-1-amine**

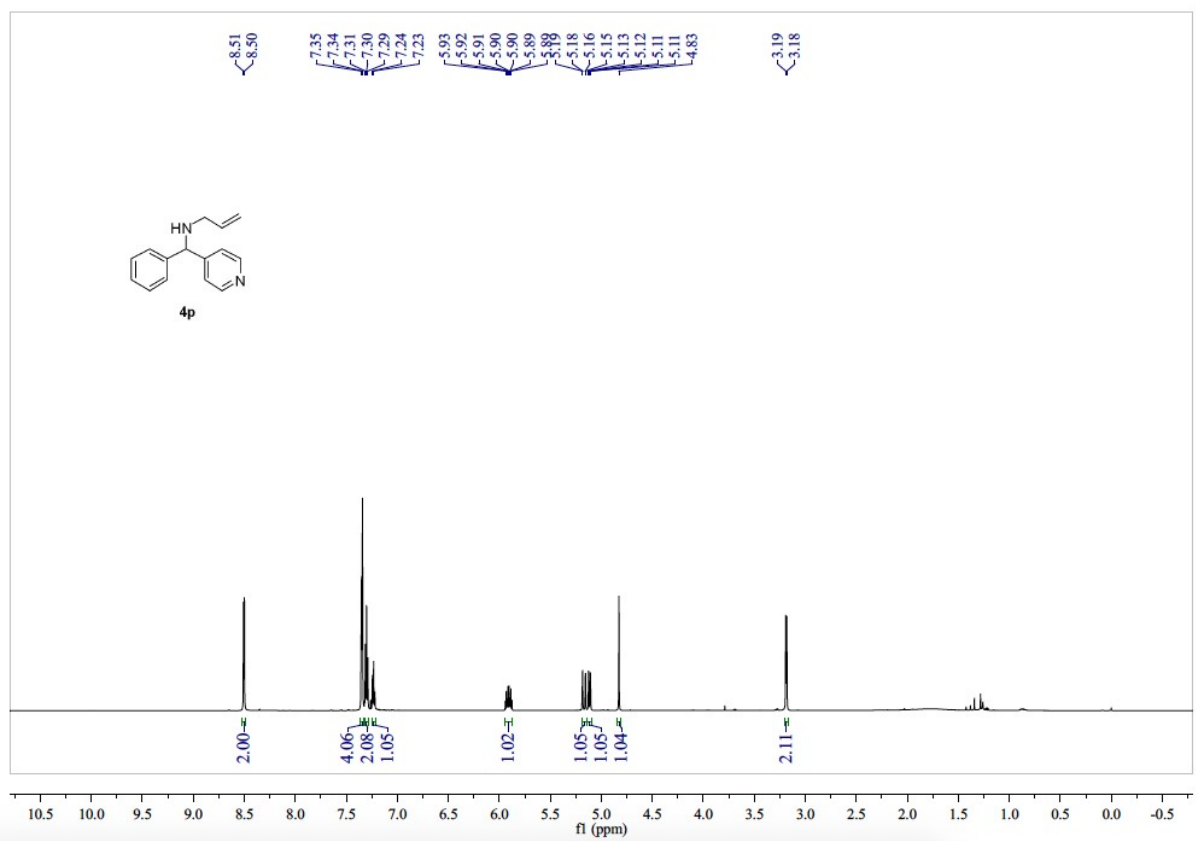

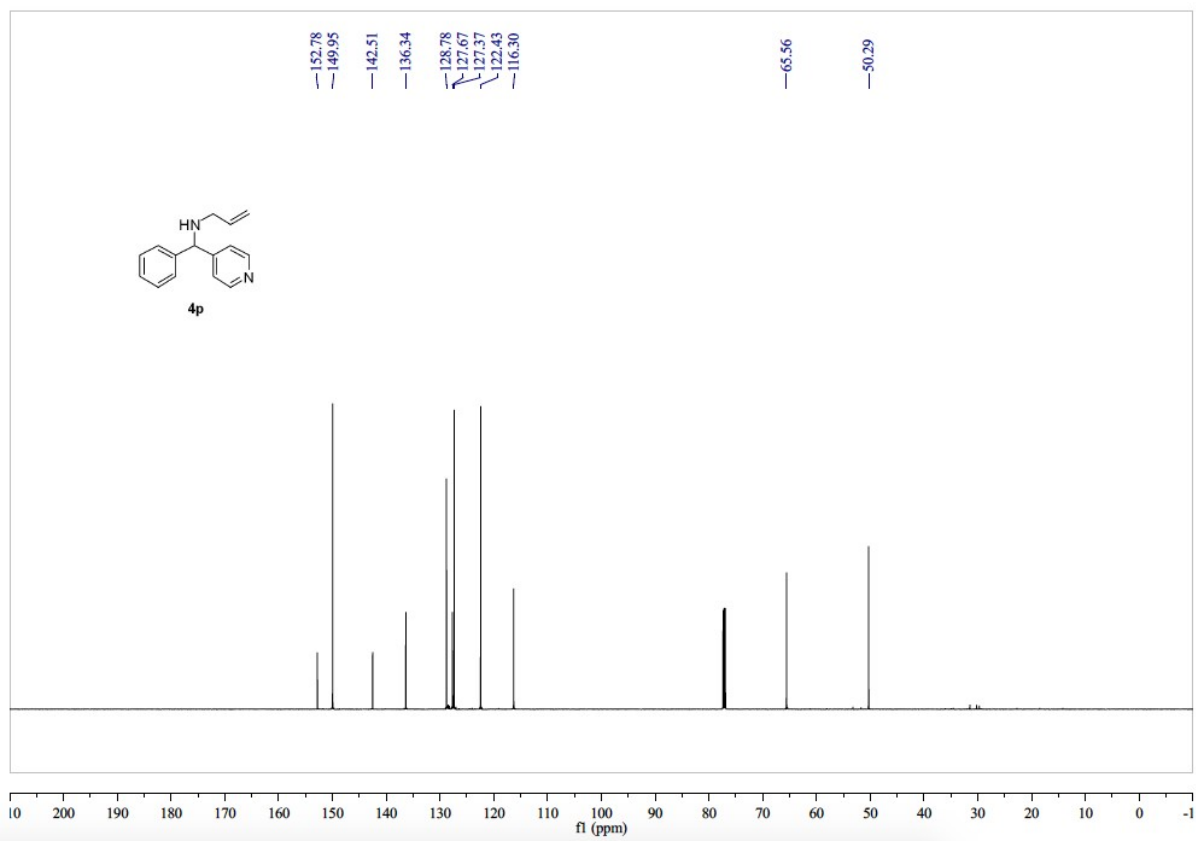

**4q: N-(phenyl(pyridin-4-yl)methyl)prop-2-yn-1-amine**

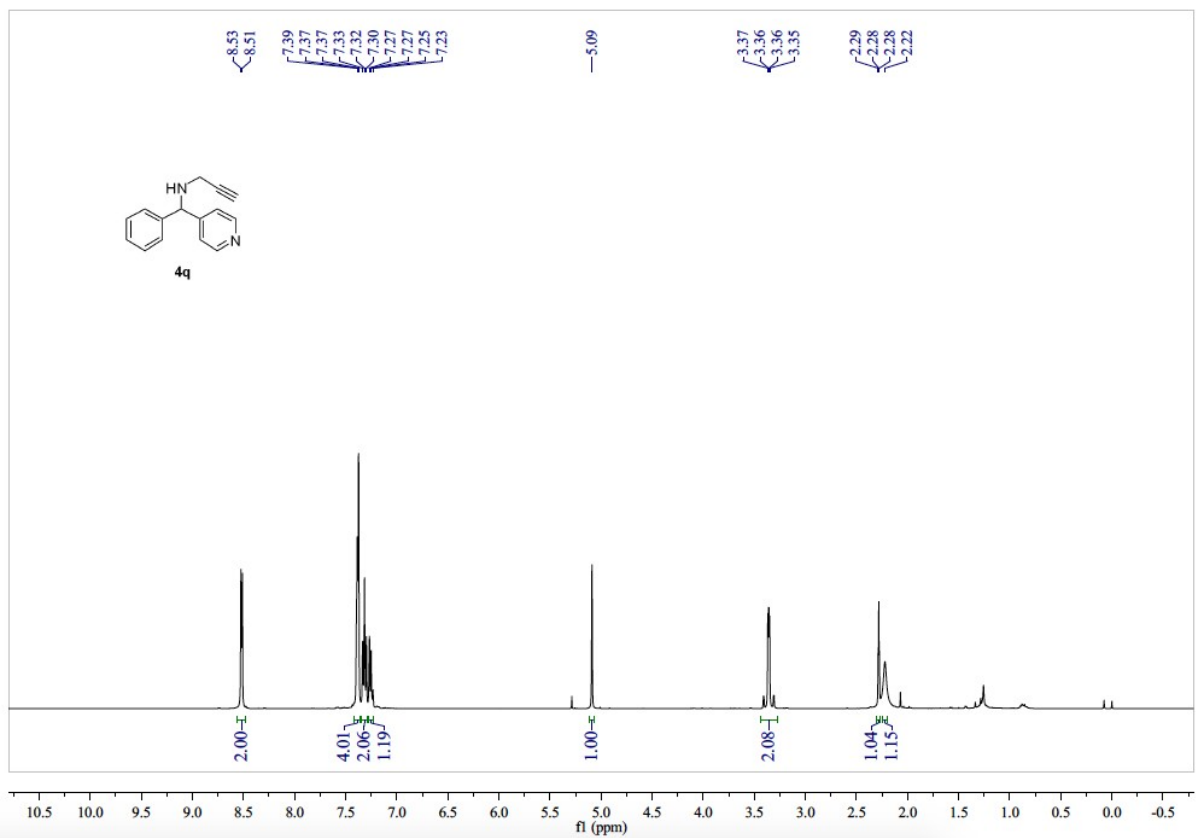

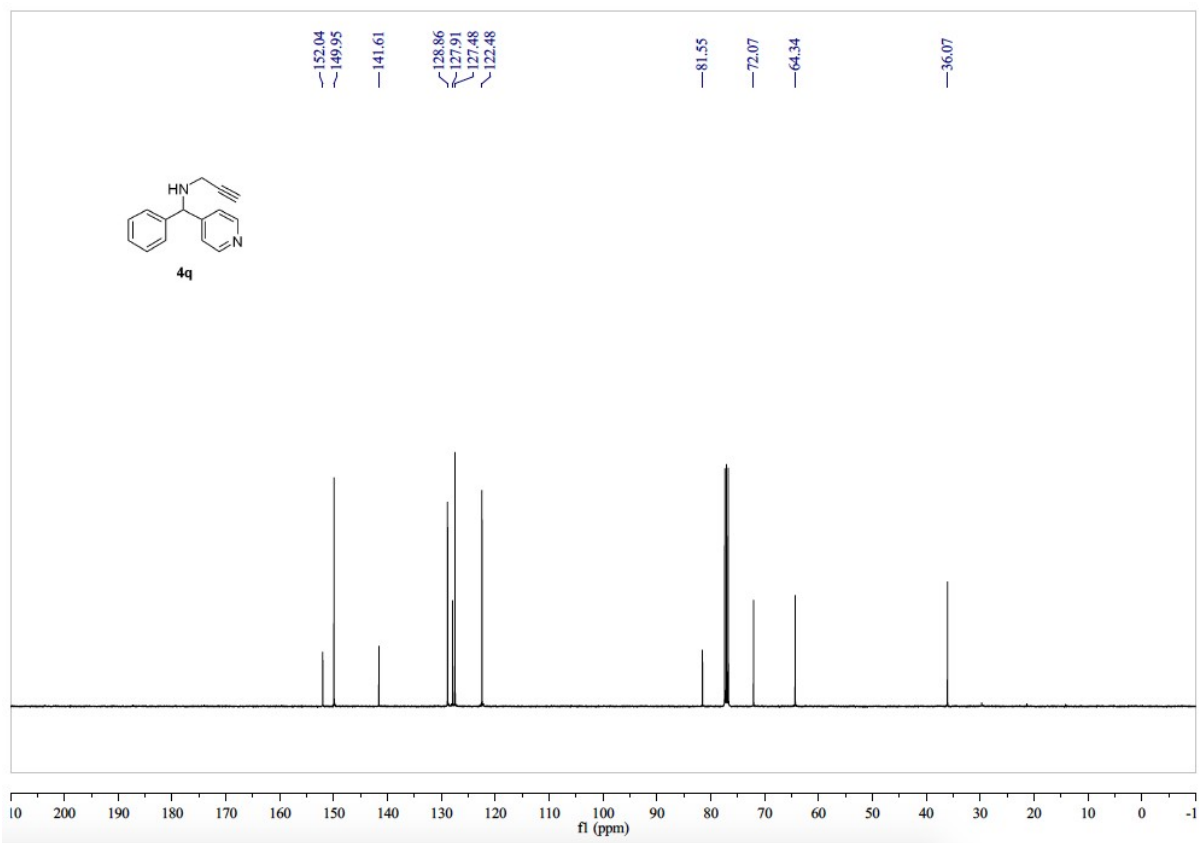

**4r: 2,2,2-trifluoro-N-(phenyl(pyridin-4-yl)methyl)ethan-1-amine**

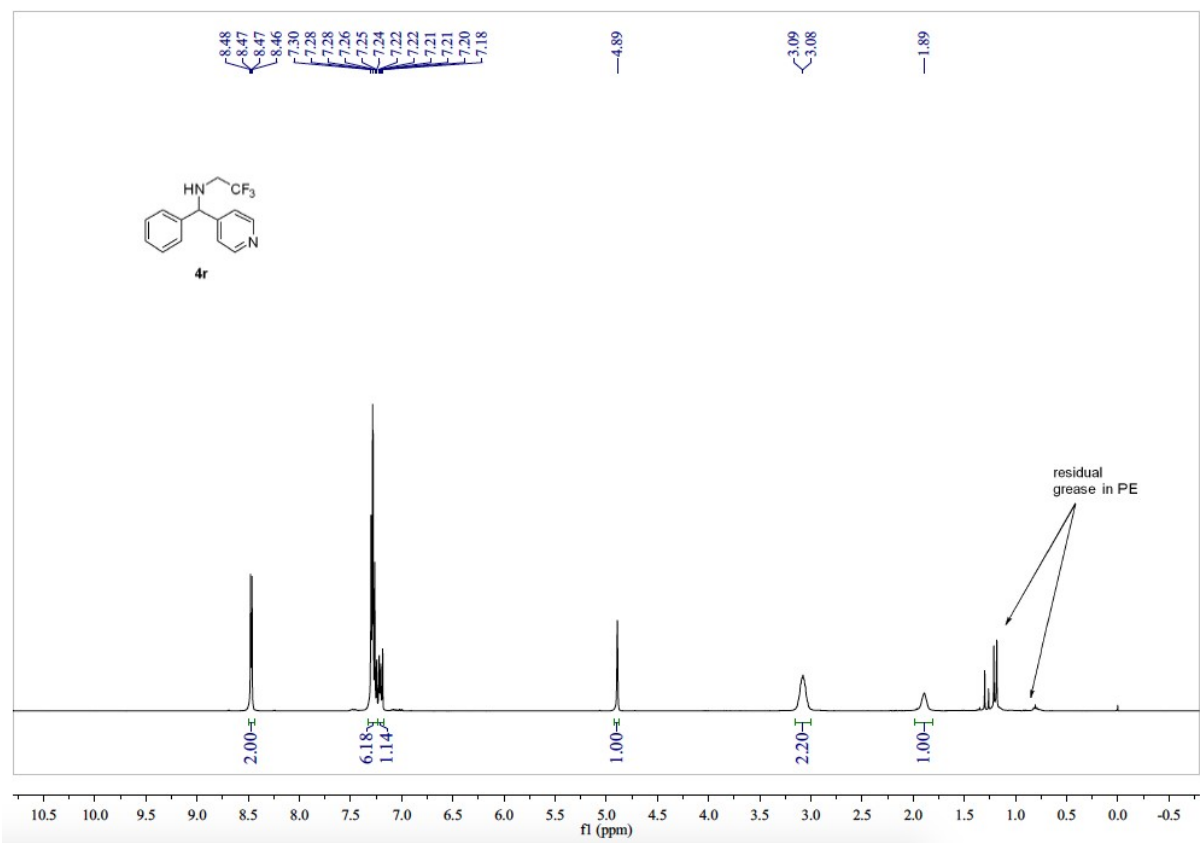

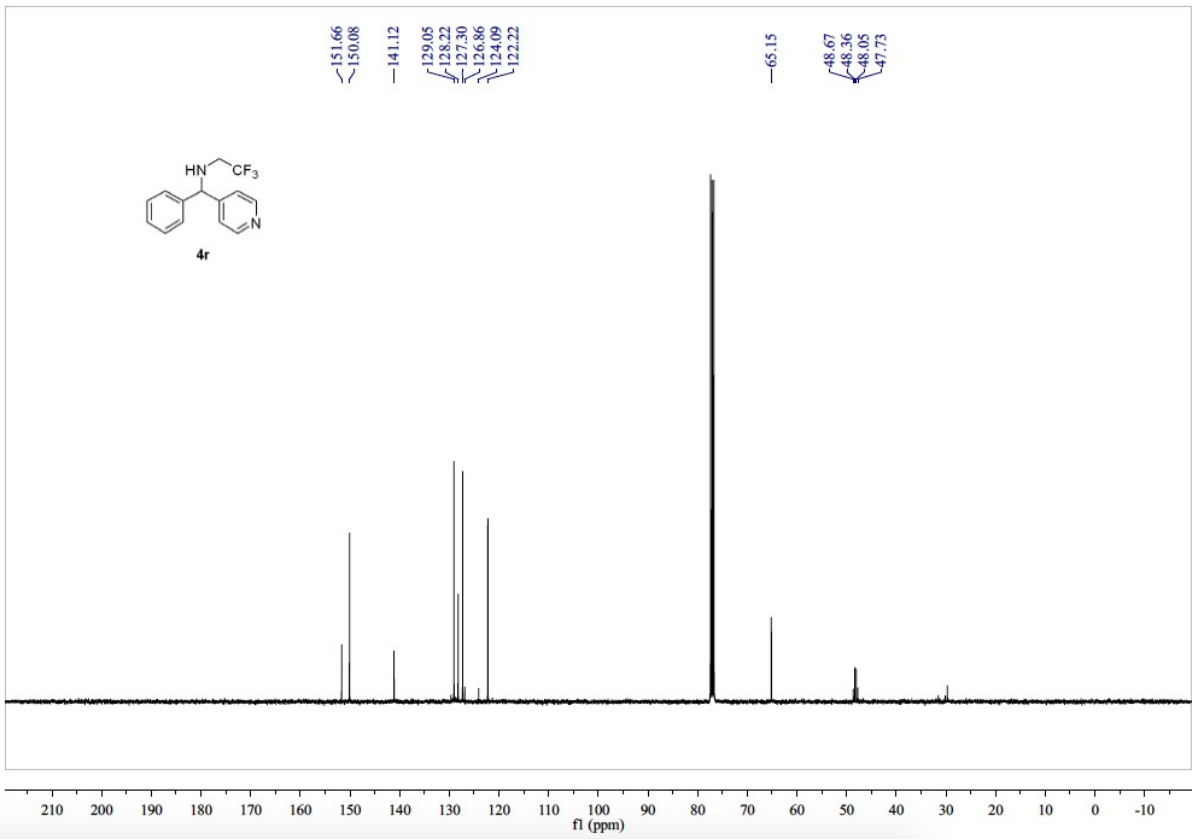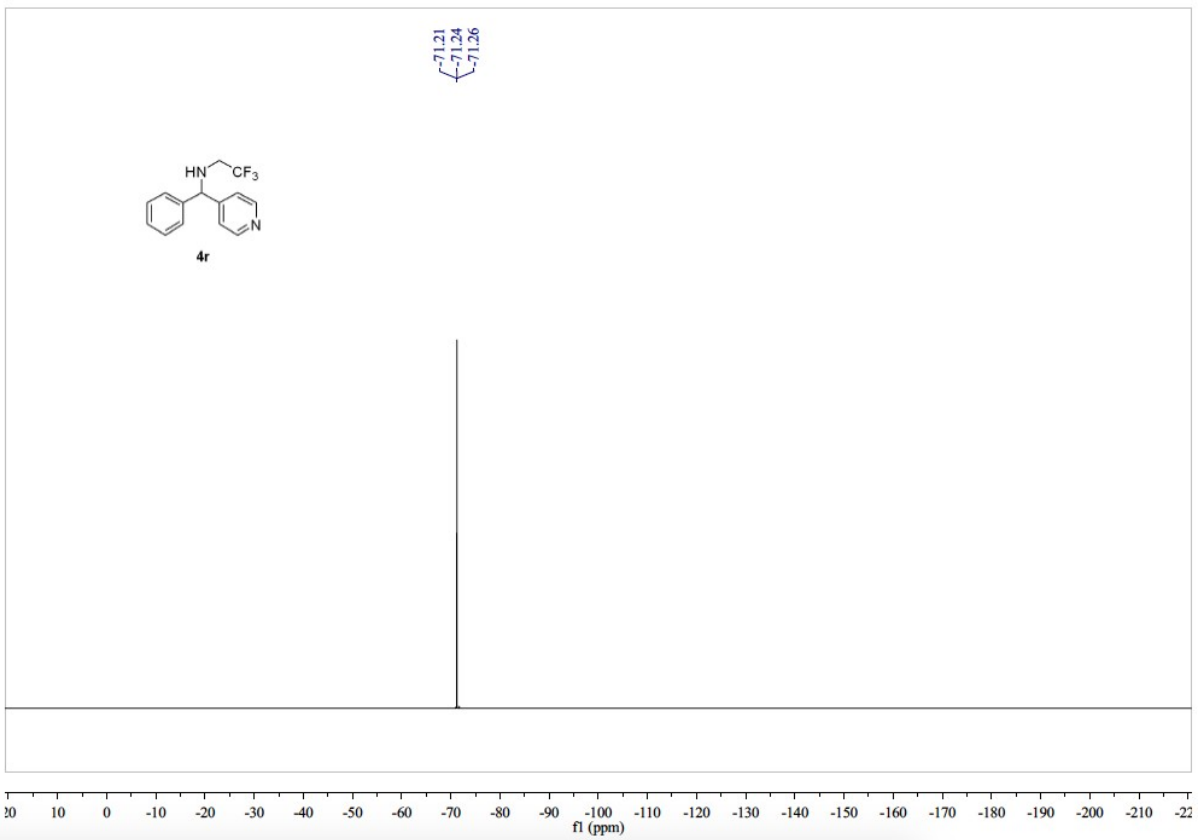

**4s: 2-chloro-N-(phenyl(pyridin-4-yl)methyl)ethan-1-amine**

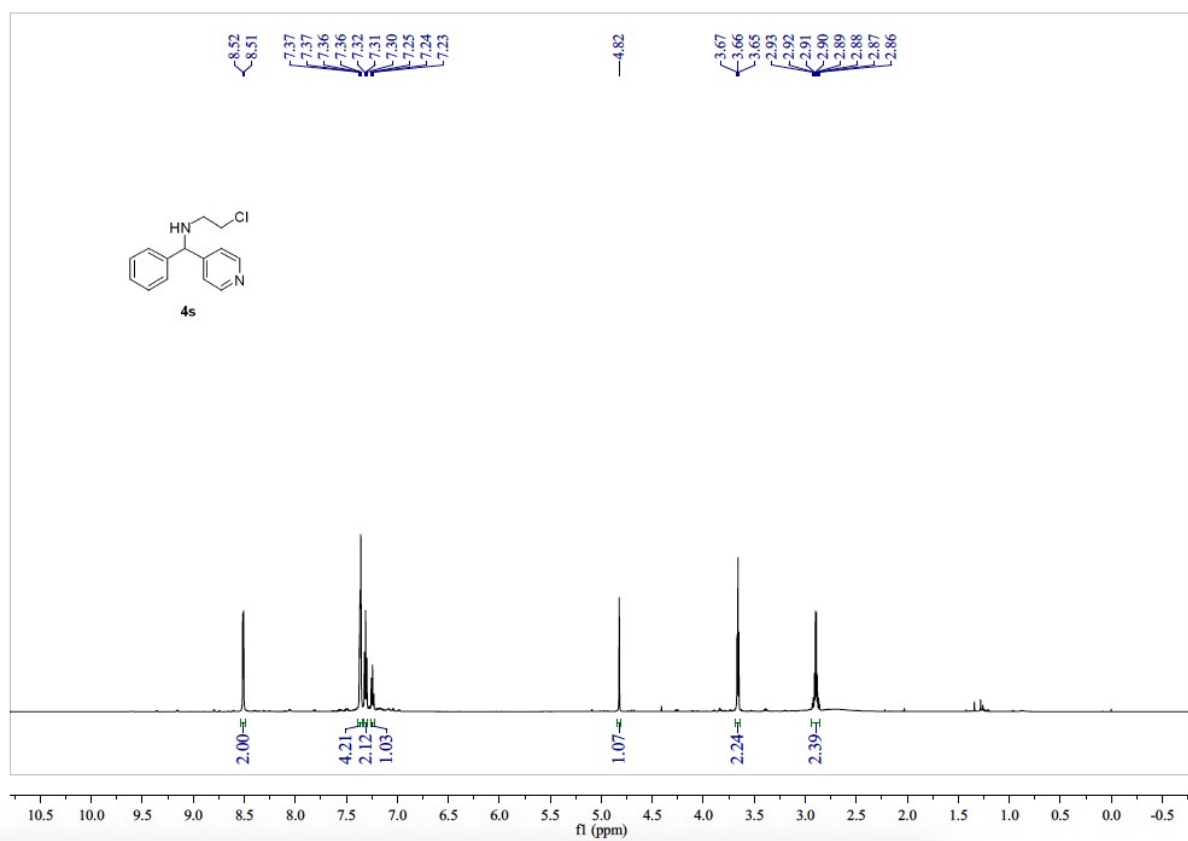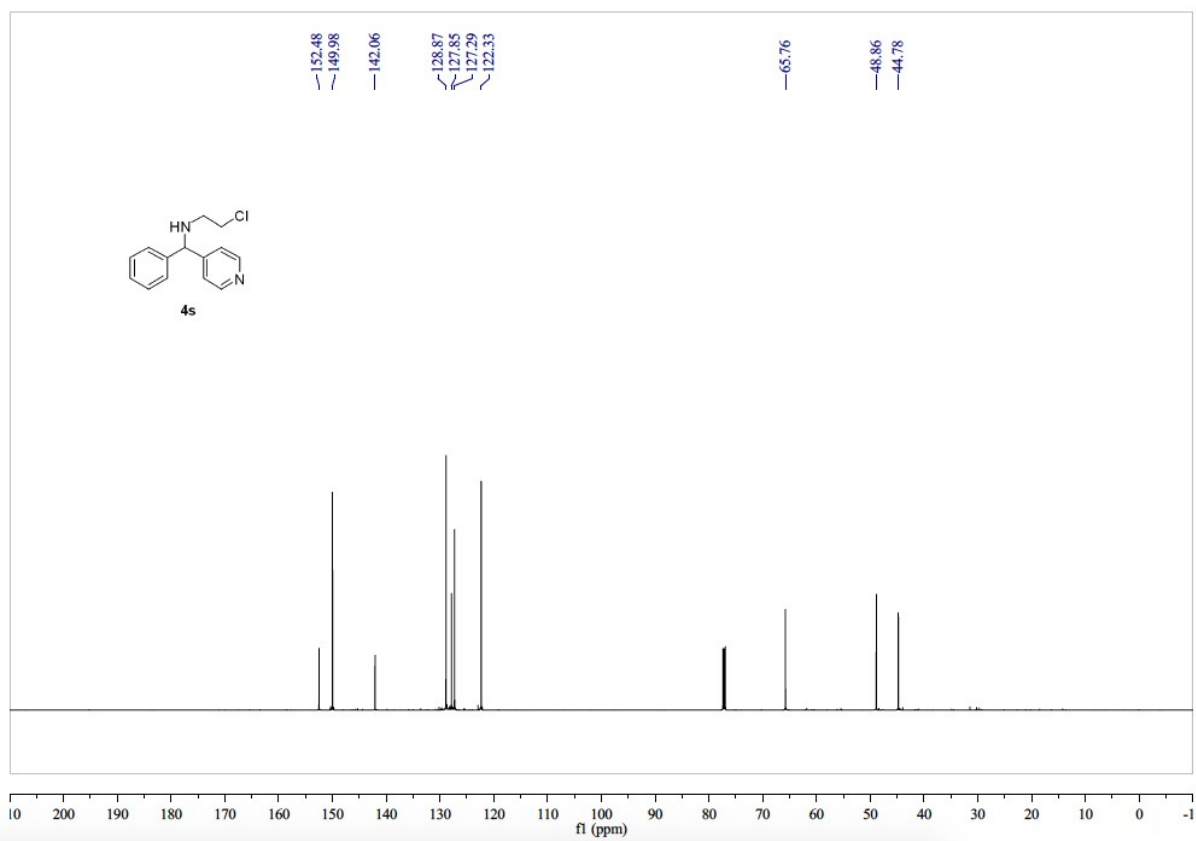

**4t: N-(phenyl(pyridin-4-yl)methyl)-3-(triethoxysilyl)propan-1-amine**

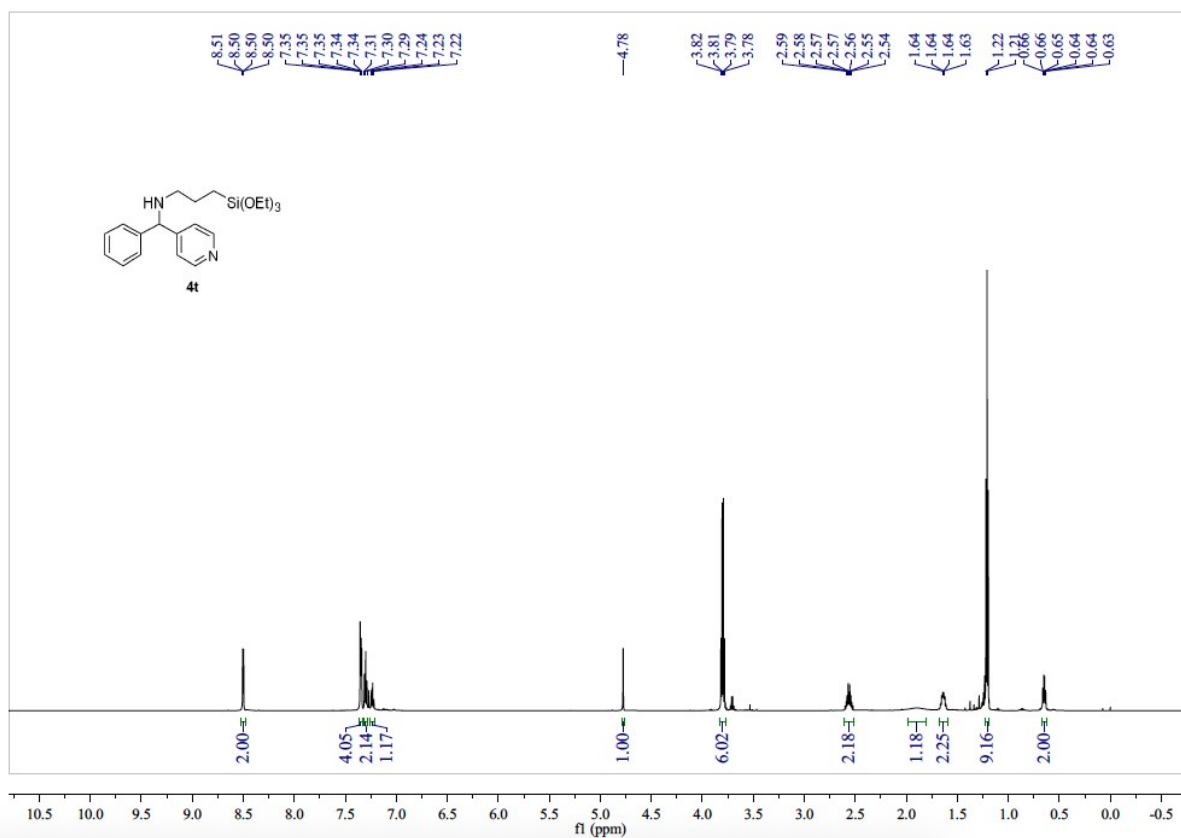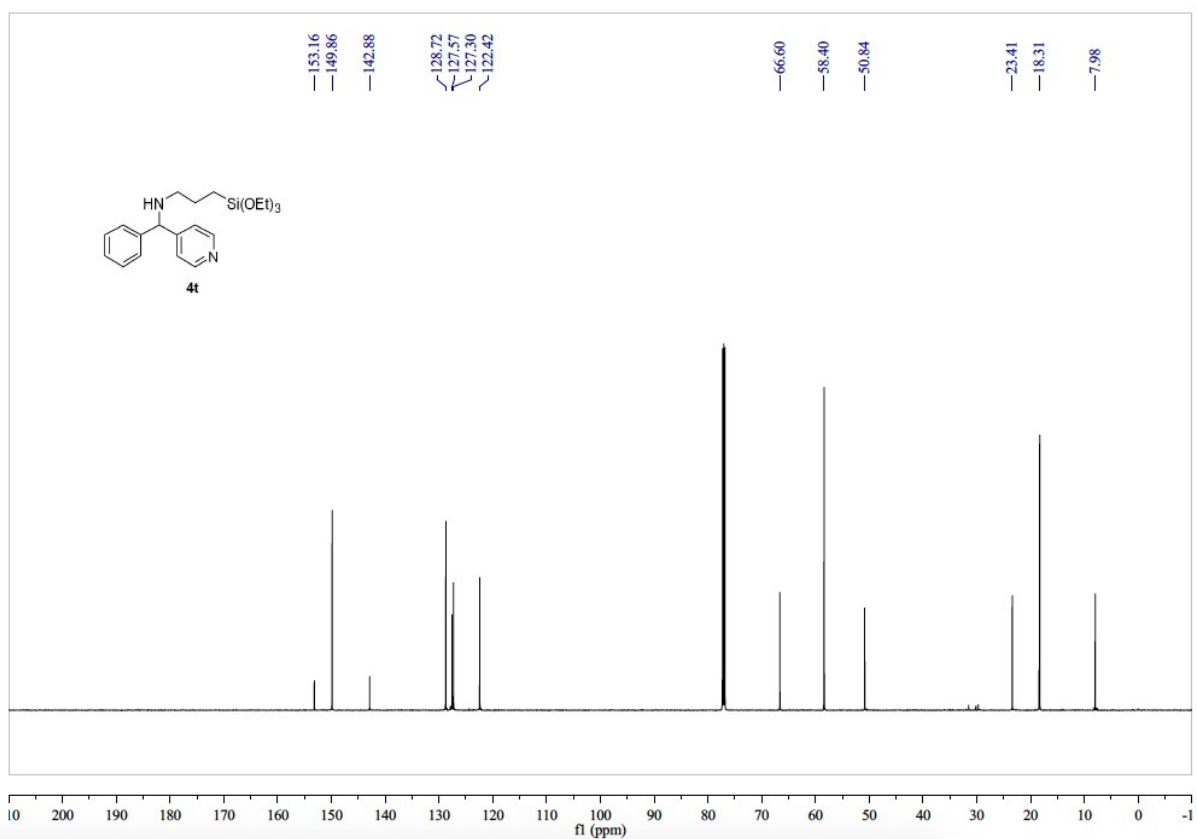



### 4u: *N*-(phenyl(pyridin-4-yl)methyl)aniline

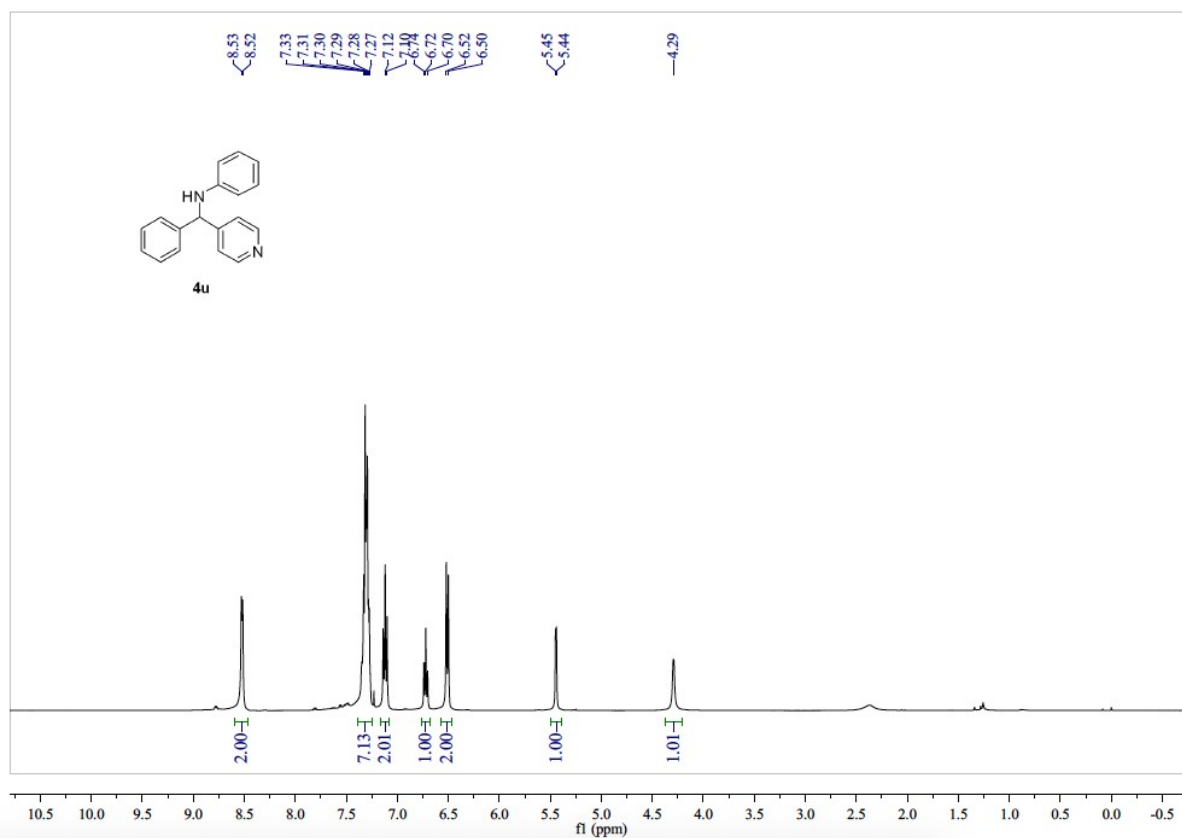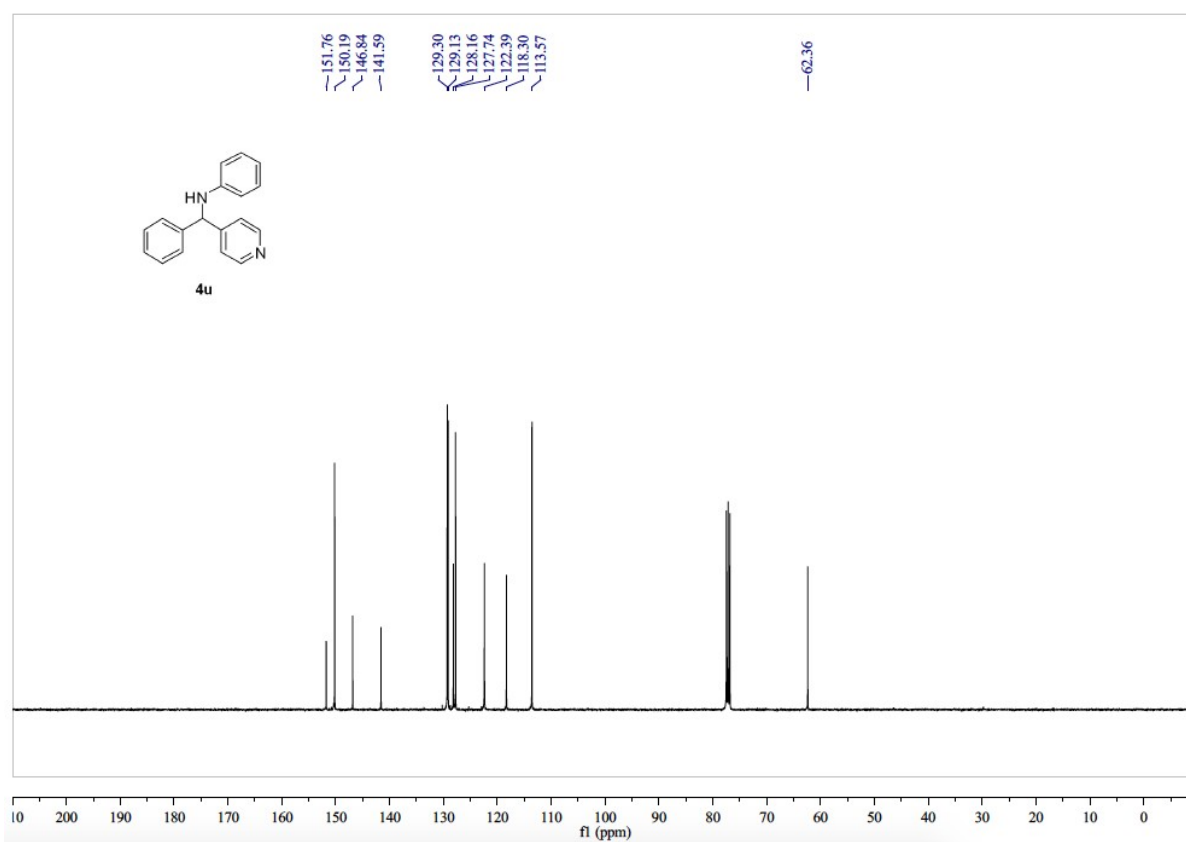

### 4v: 2-fluoro-N-(phenyl(pyridin-4-yl)methyl)aniline

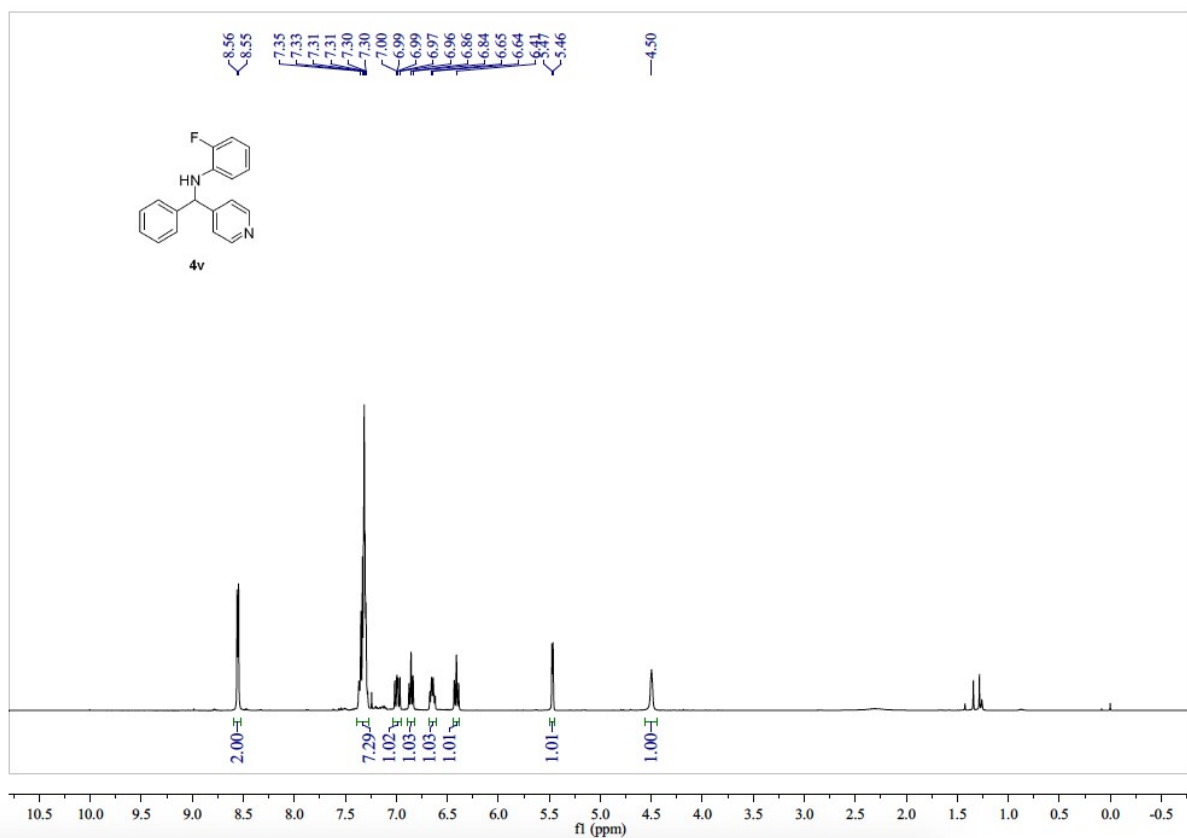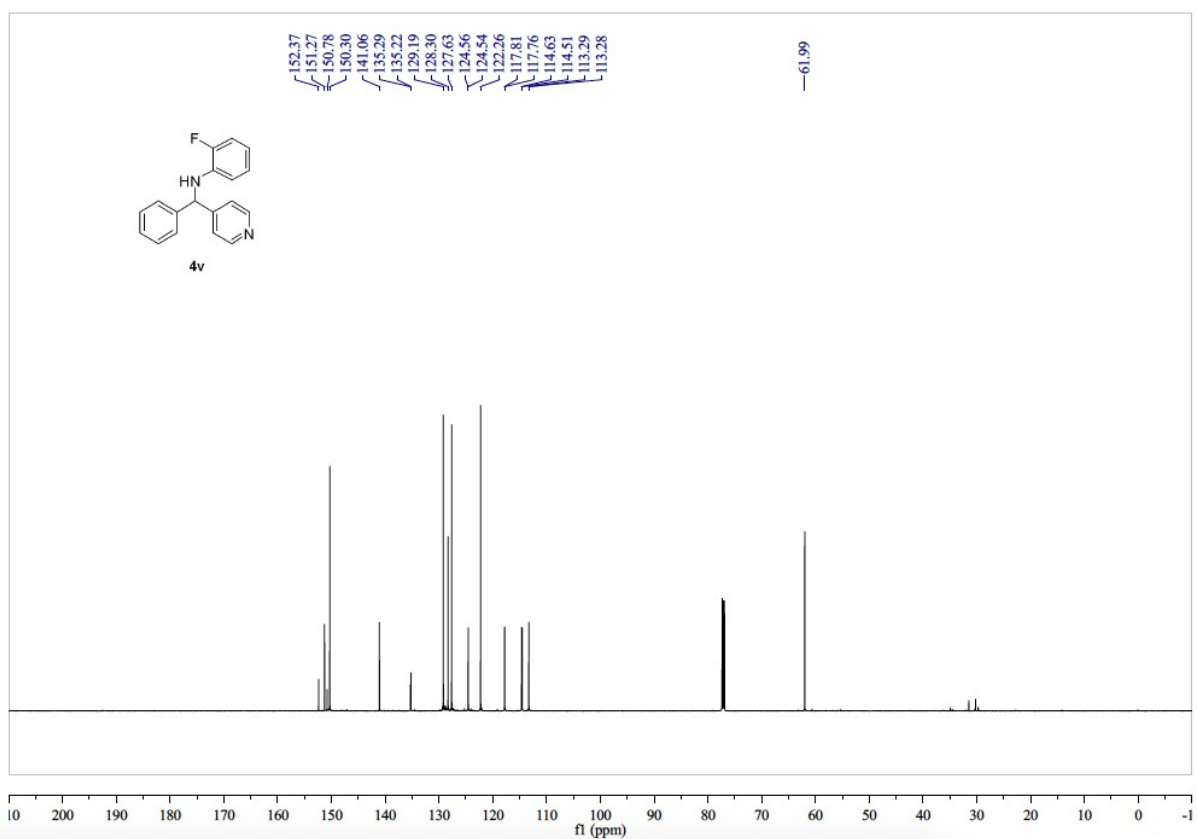

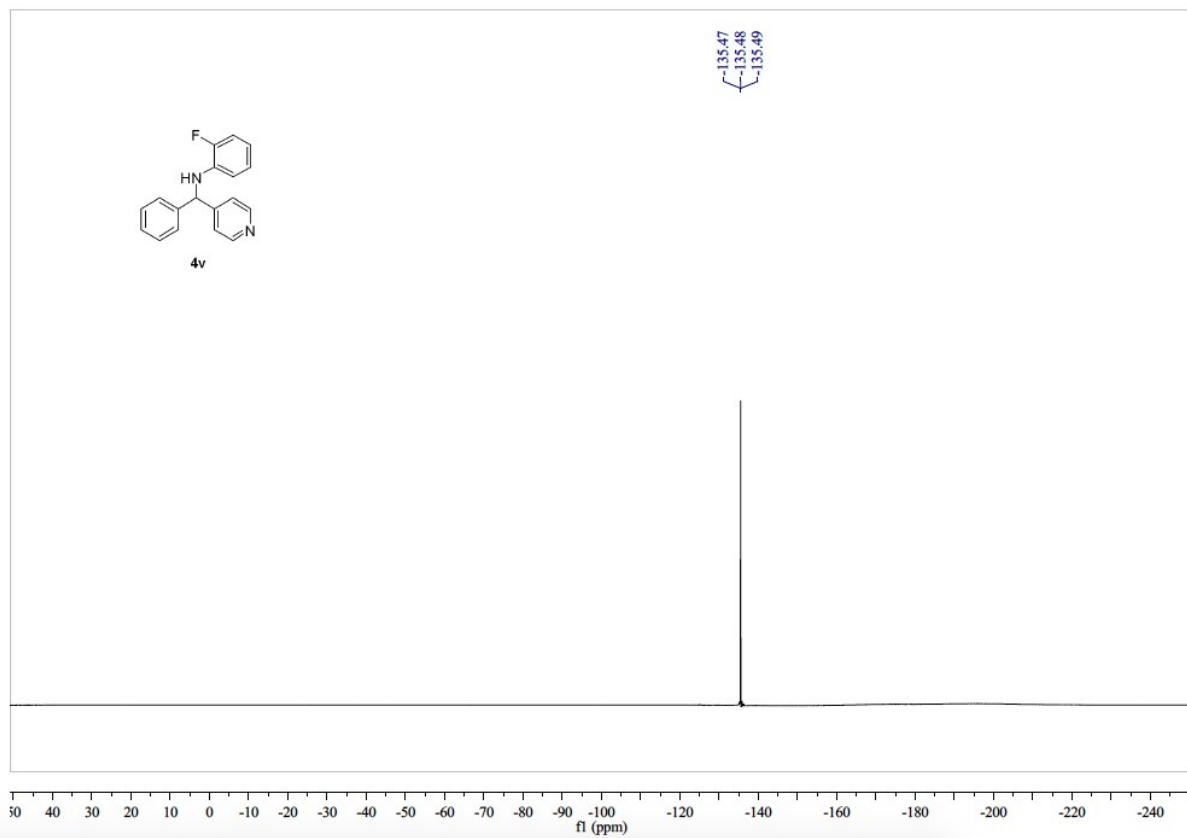

**4w: 3-chloro-N-(phenyl(pyridin-4-yl)methyl)aniline**

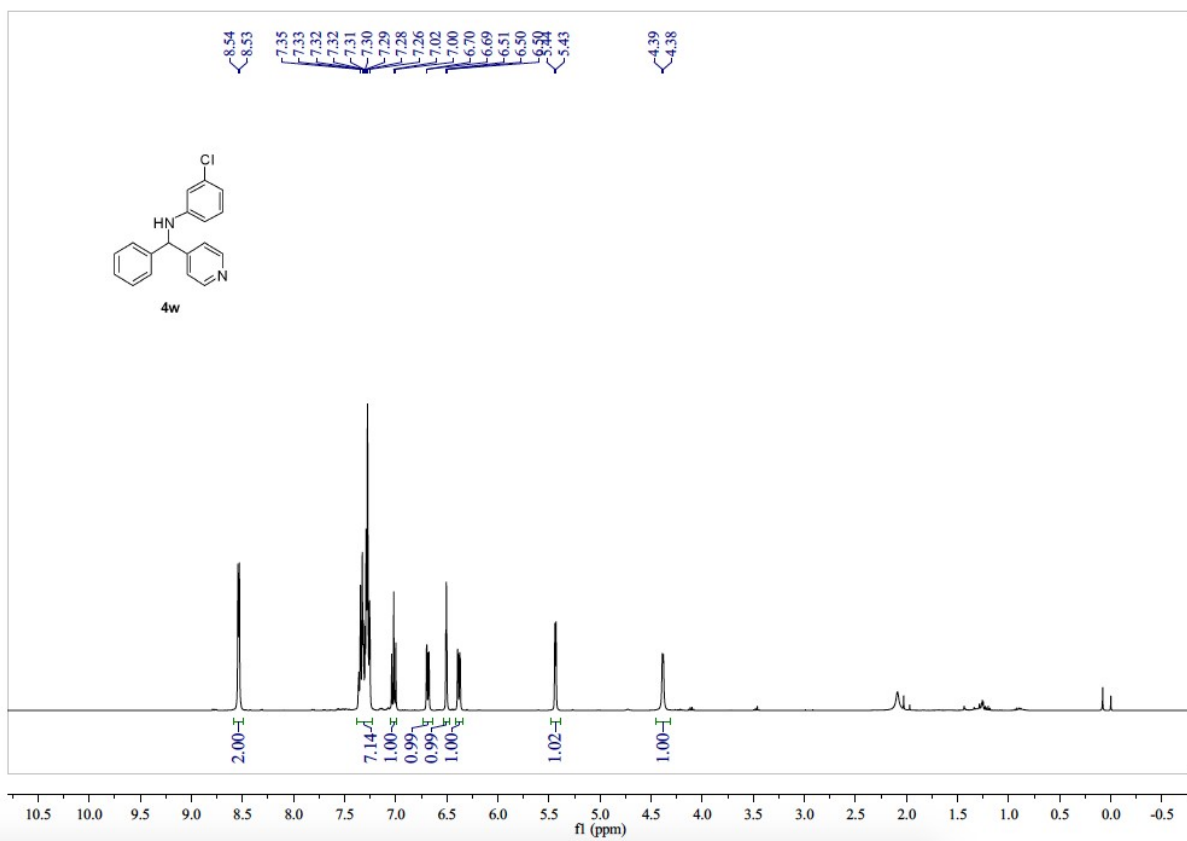

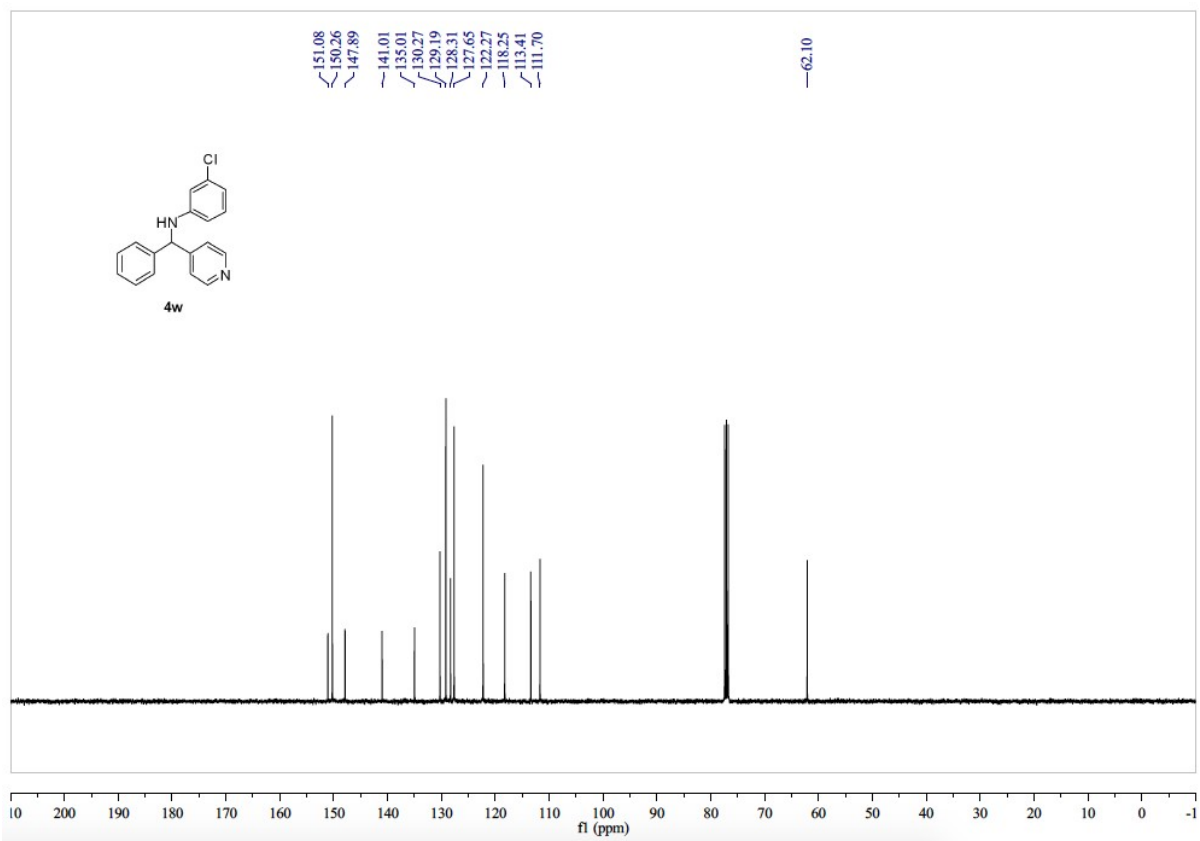

**4x: 3,5-dimethoxy-N-(phenyl(pyridin-4-yl)methyl)aniline**

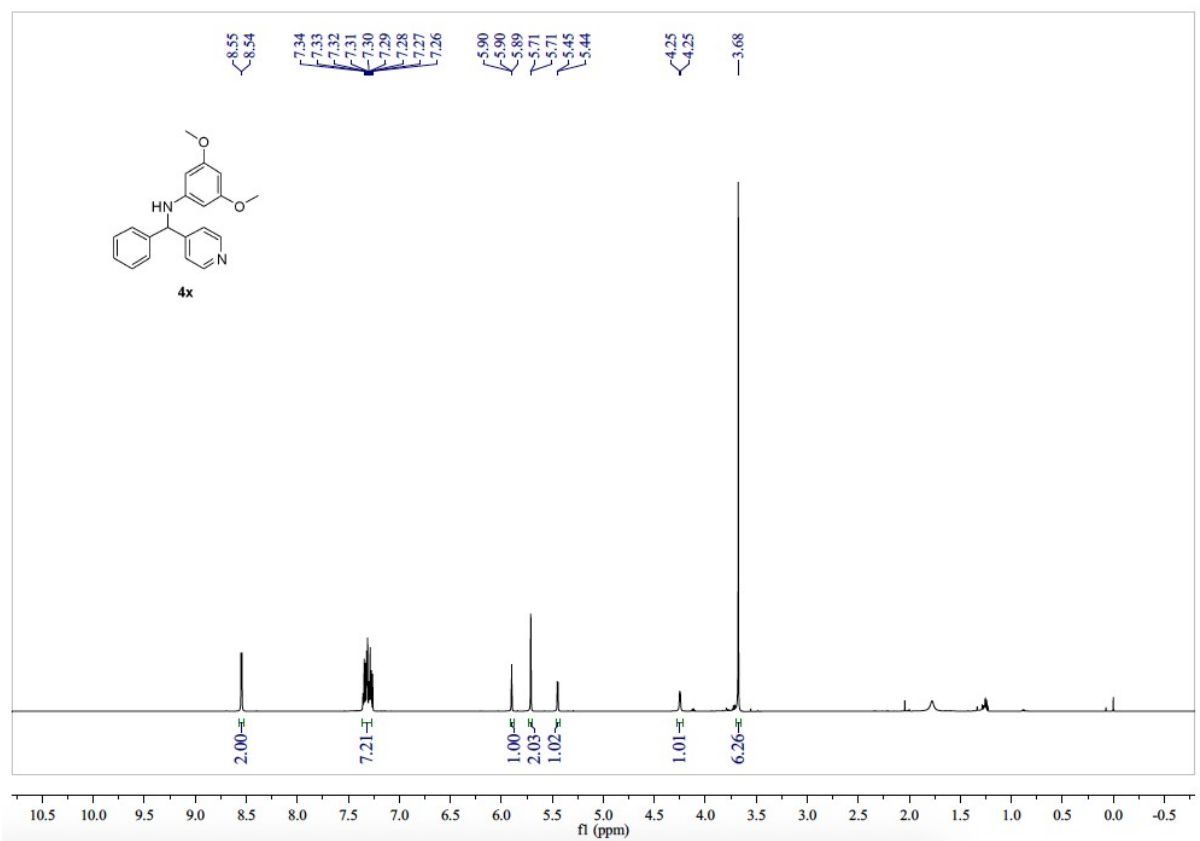

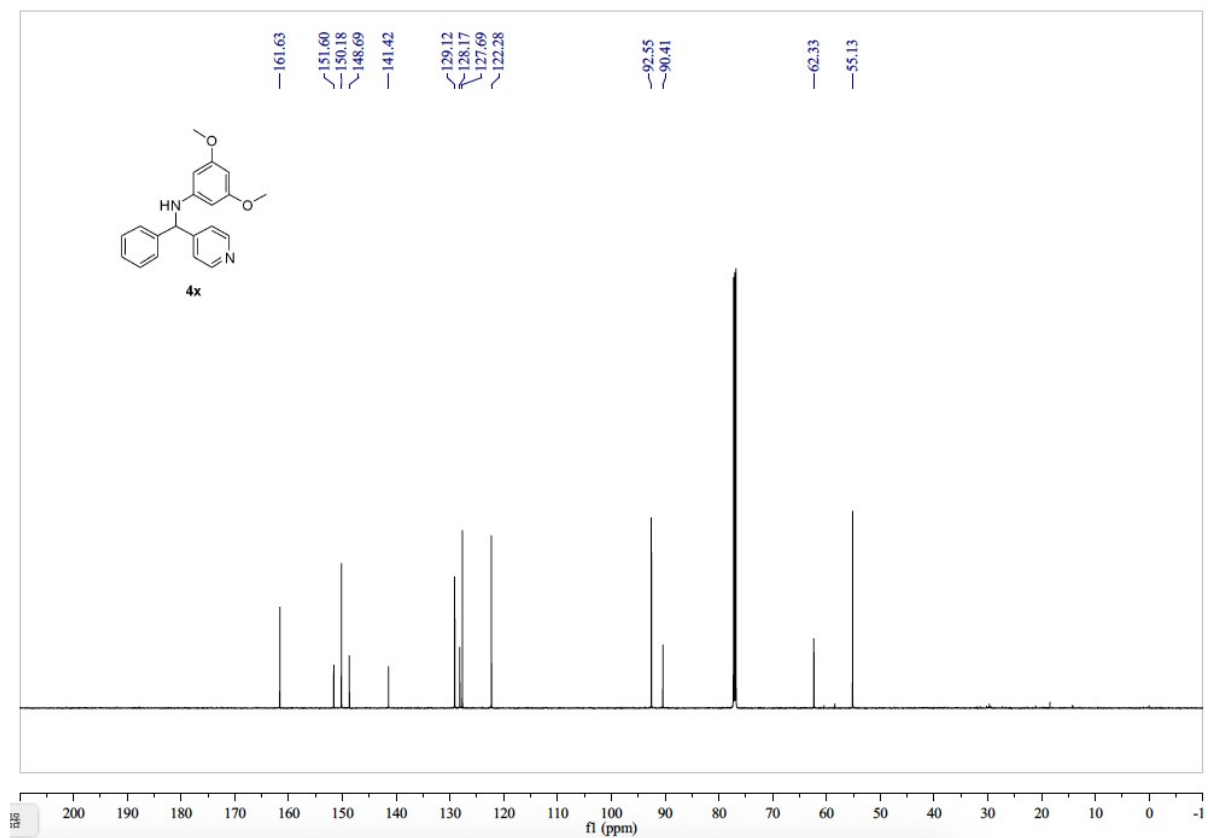

**4y: 4-bromo-N-(phenyl(pyridin-4-yl)methyl)aniline**

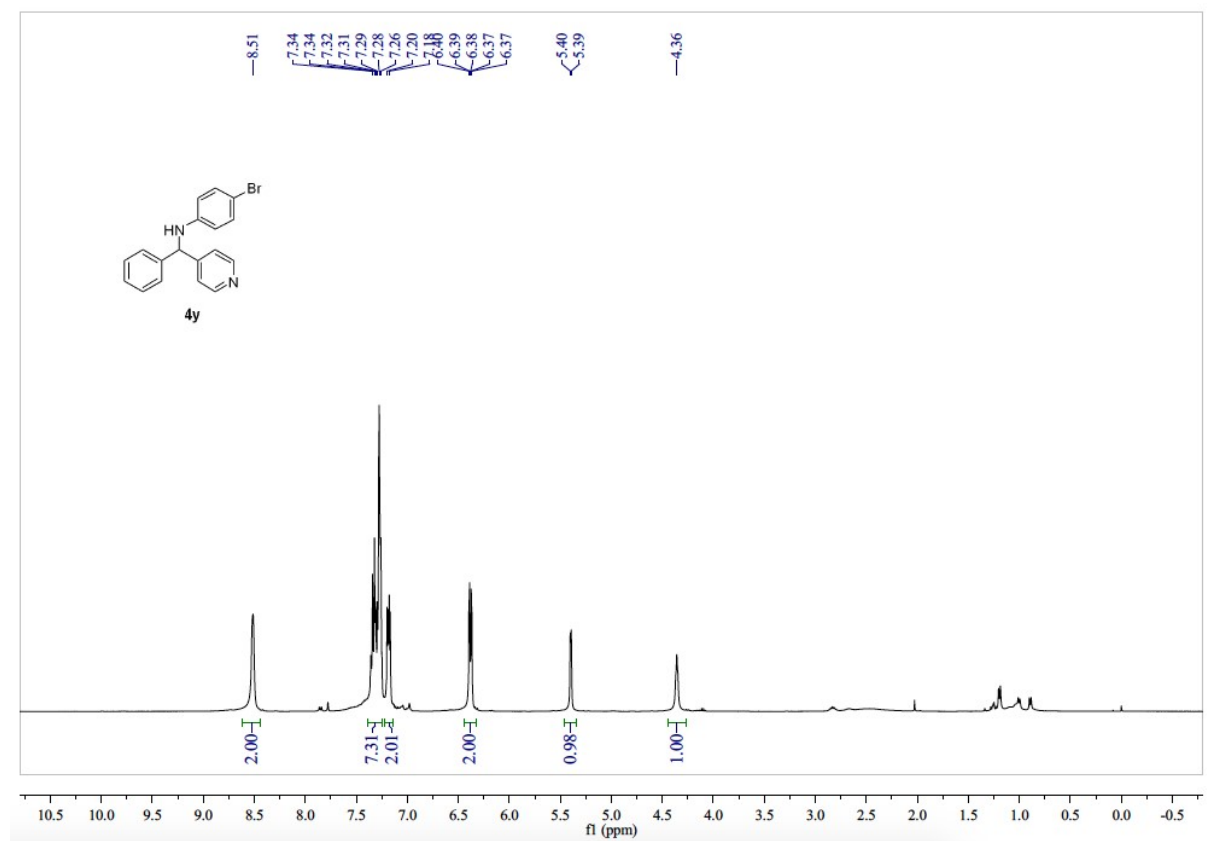

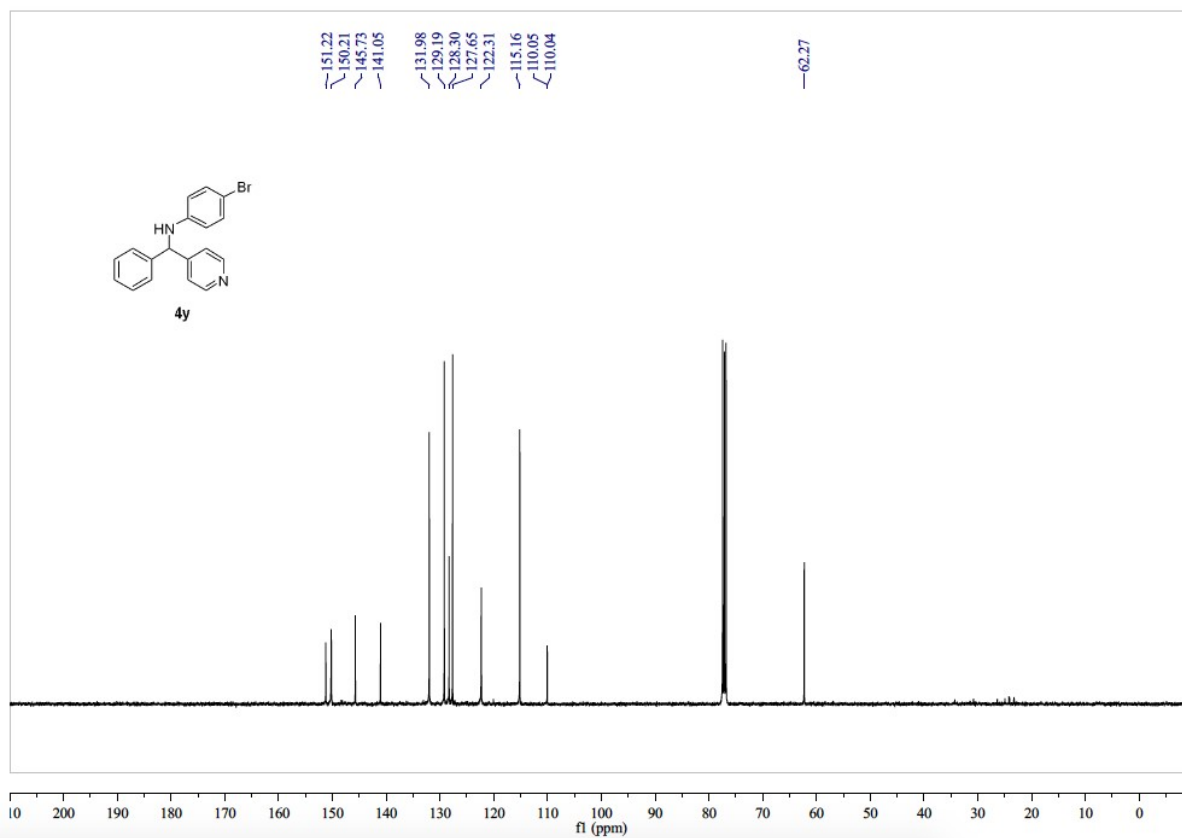

**4z: 4-iodo-N-(phenyl(pyridin-4-yl)methyl)aniline**

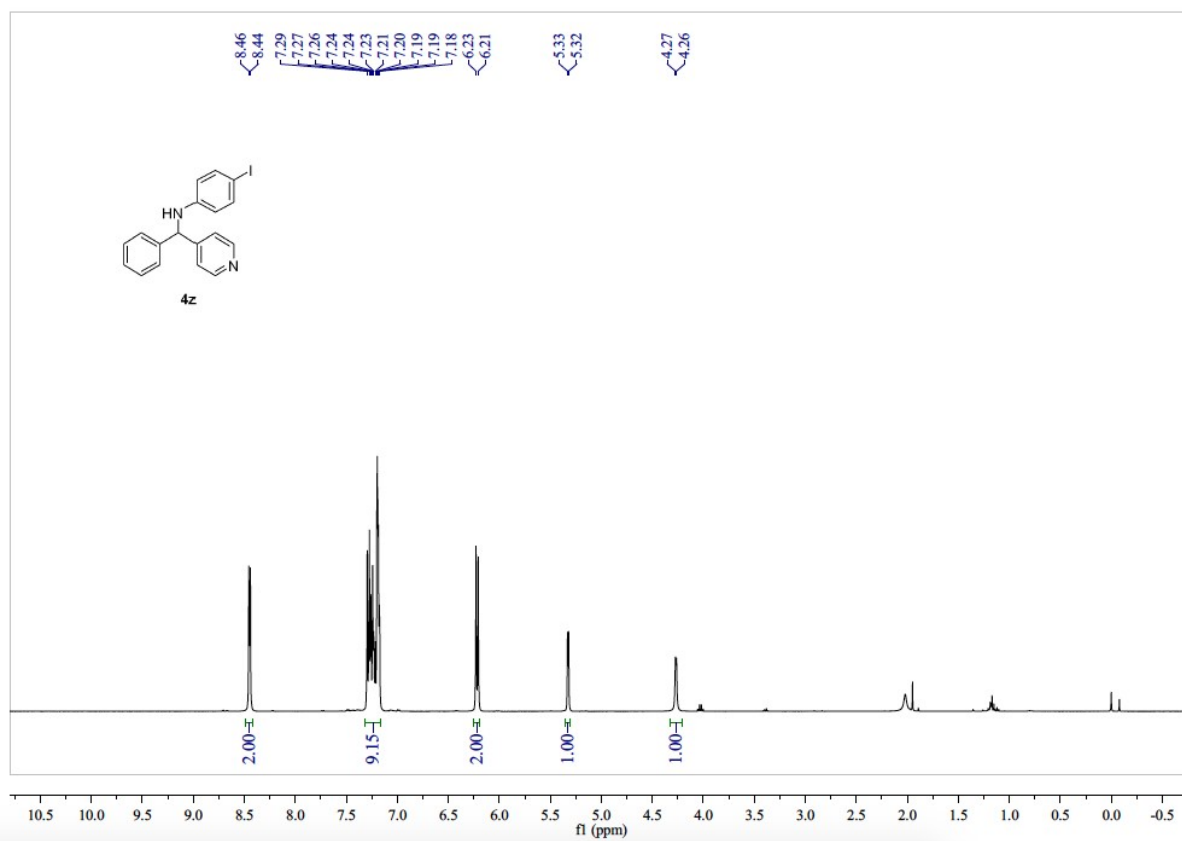

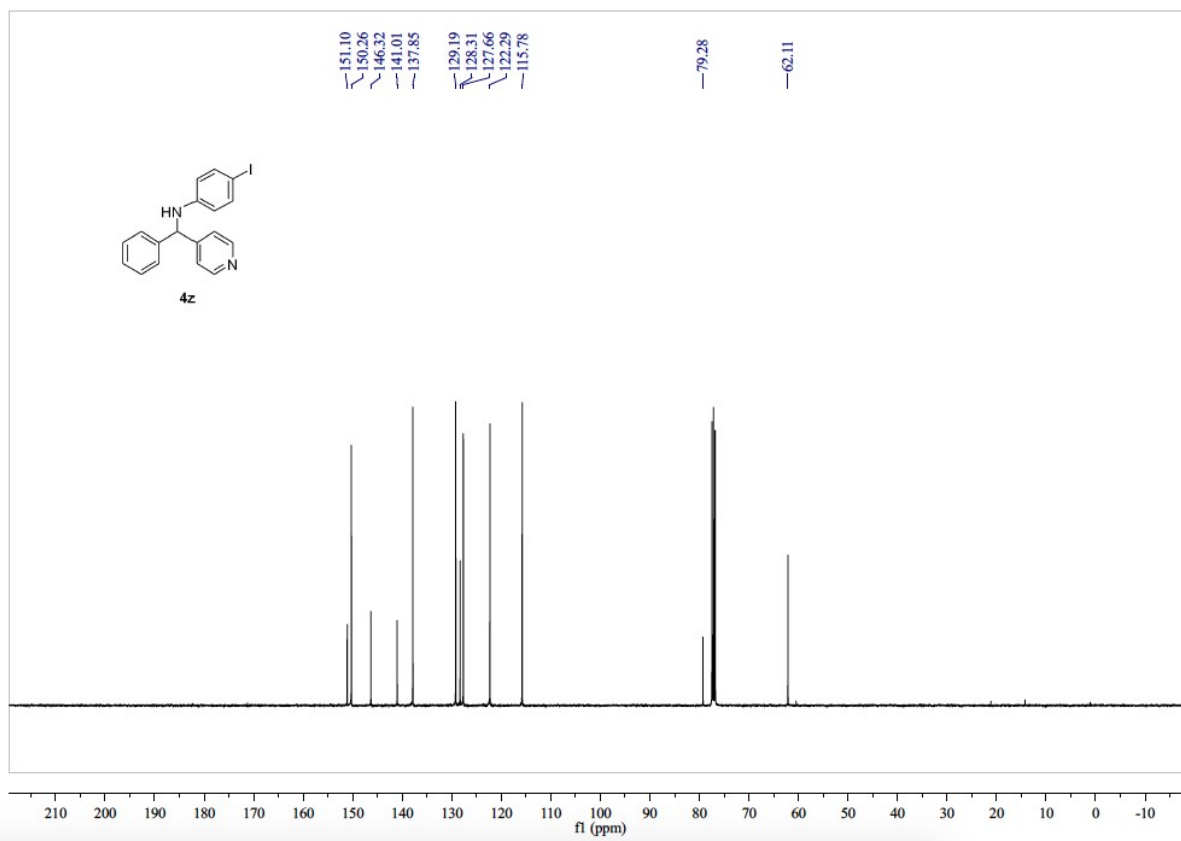

**4aa: *N*-(phenyl(pyridin-4-yl)methyl)-4-(trifluoromethyl)aniline**

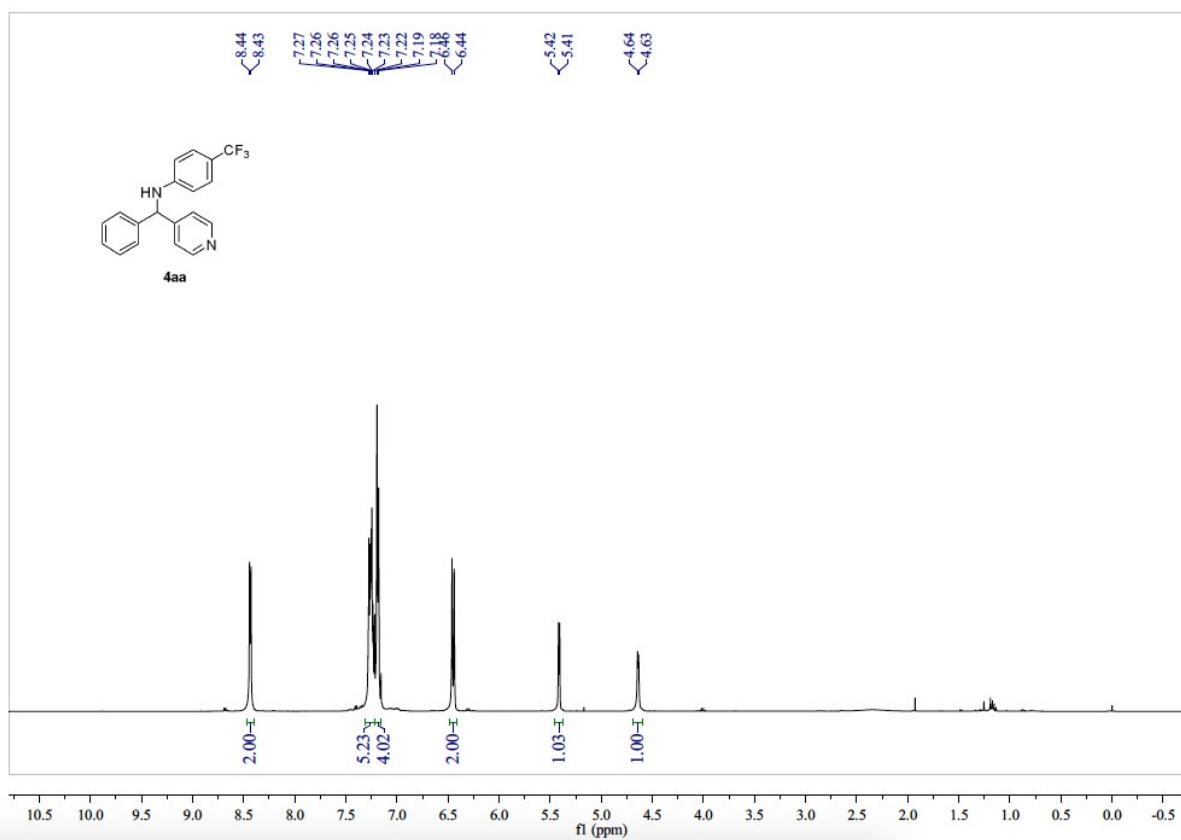

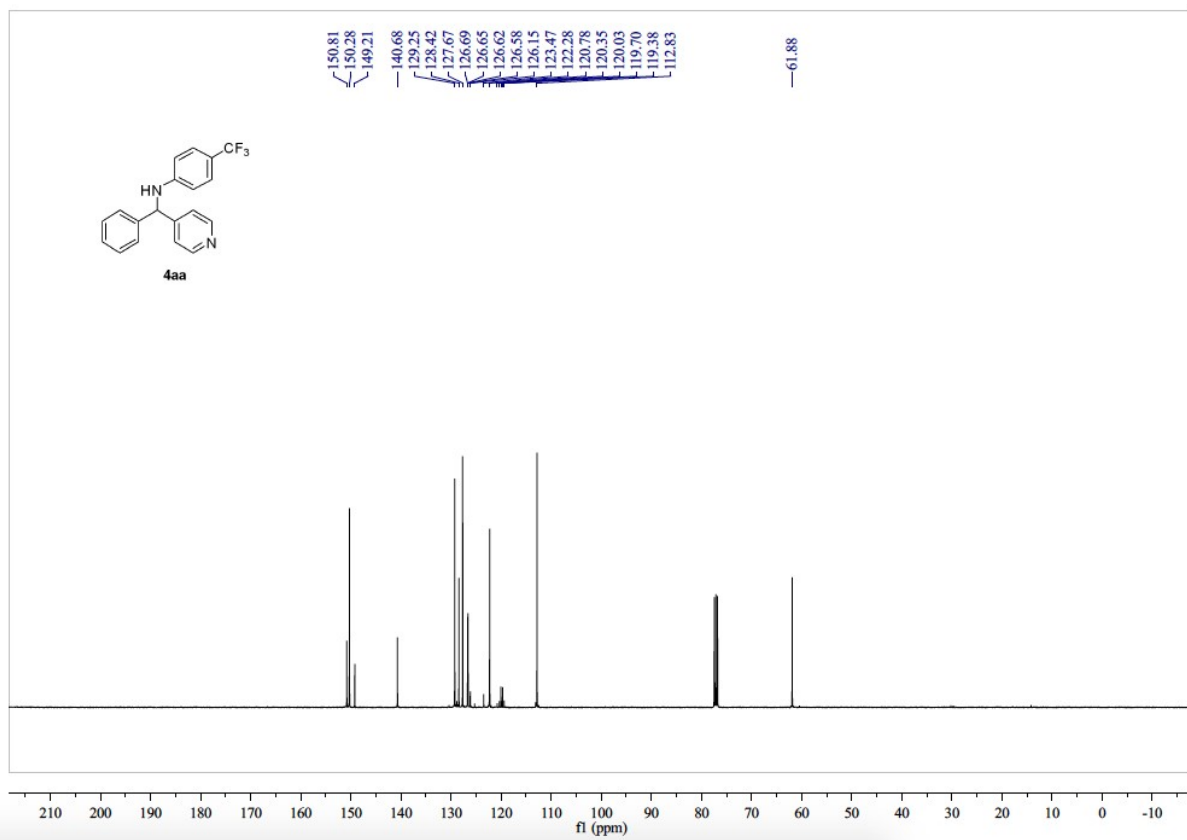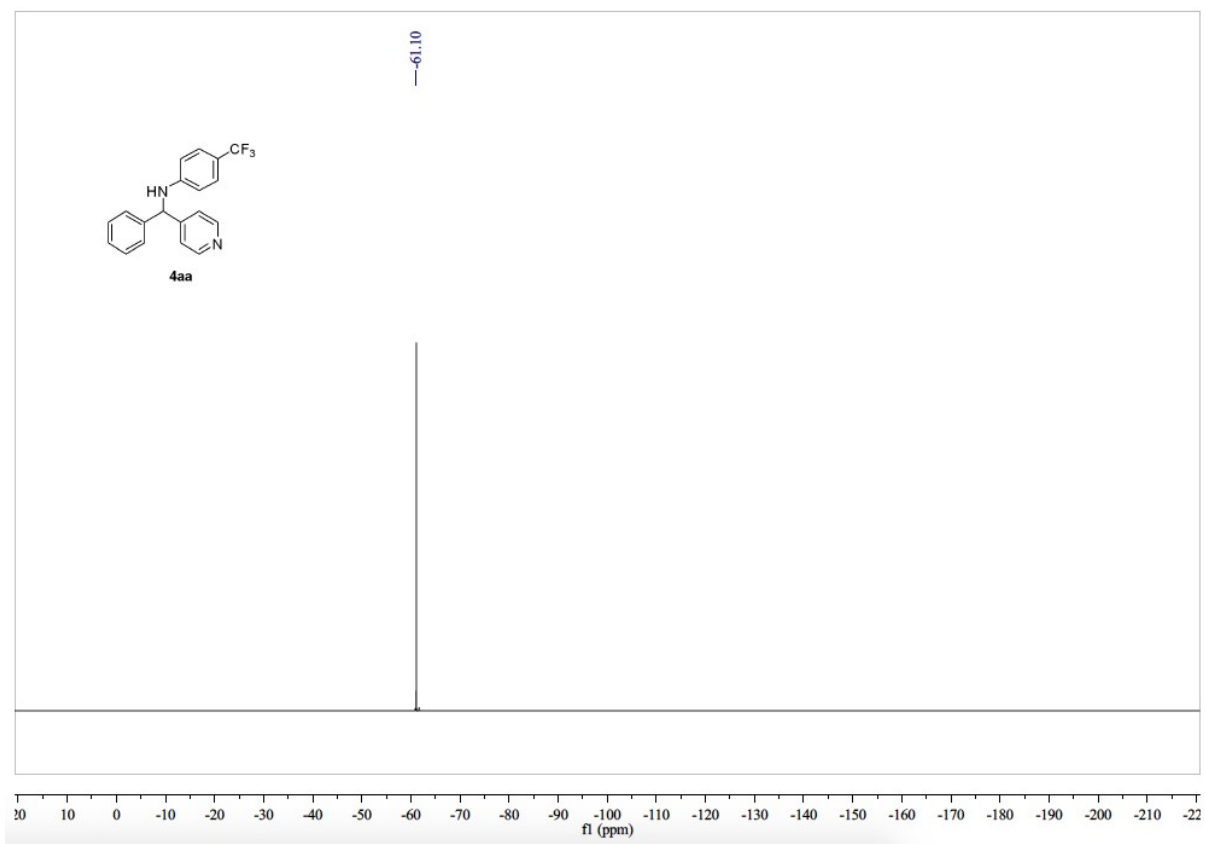



**4ab: 1-(4-((phenyl(pyridin-4-yl)methyl)amino)phenyl)ethan-1-one**

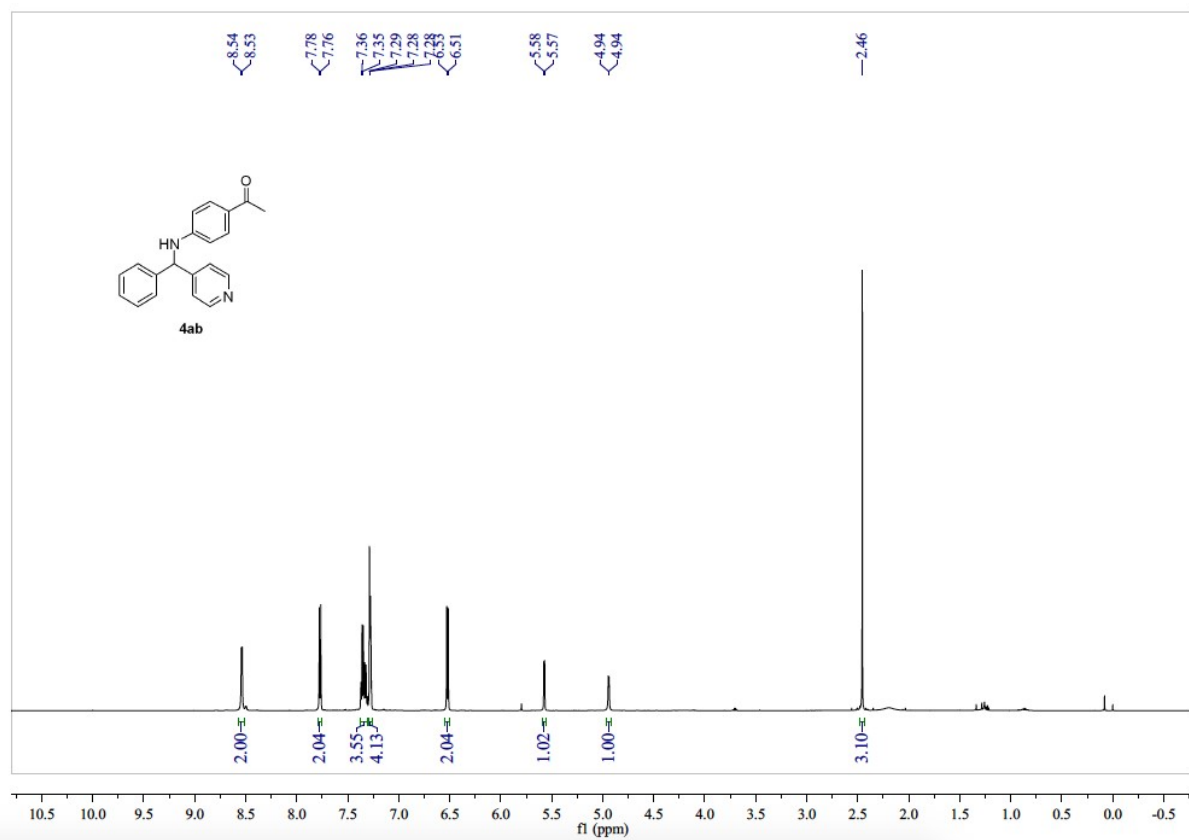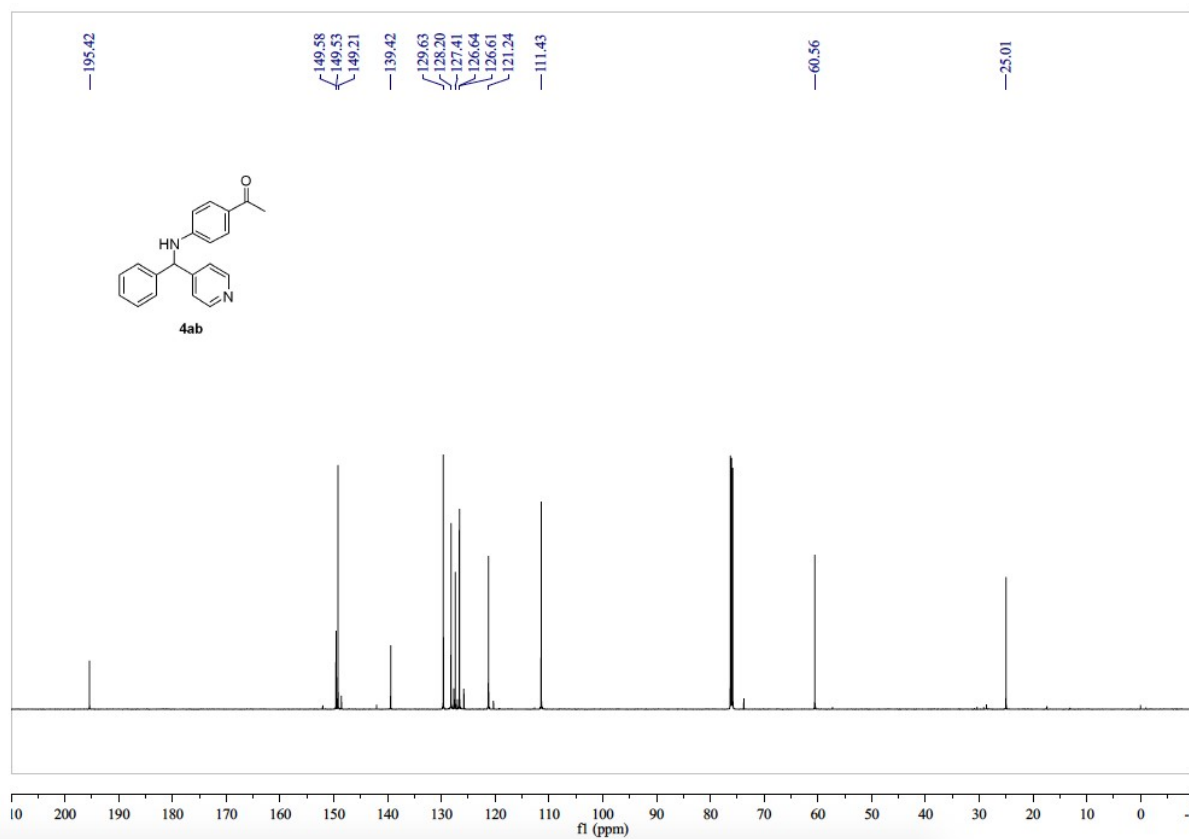

**4ac:**

***N*-(phenyl(pyridin-4-yl)methyl)-4-(4,4,5,5-tetramethyl-1,3,2-dioxaborolan-2-yl)aniline**

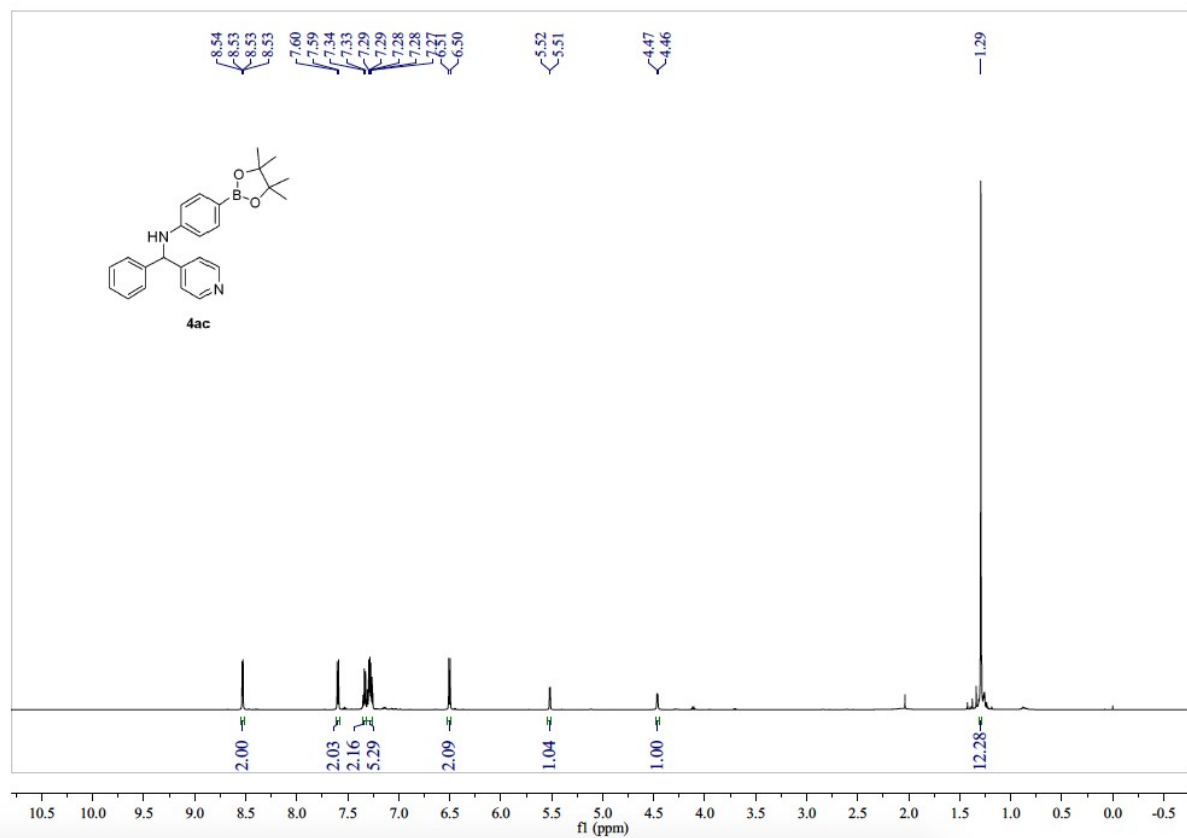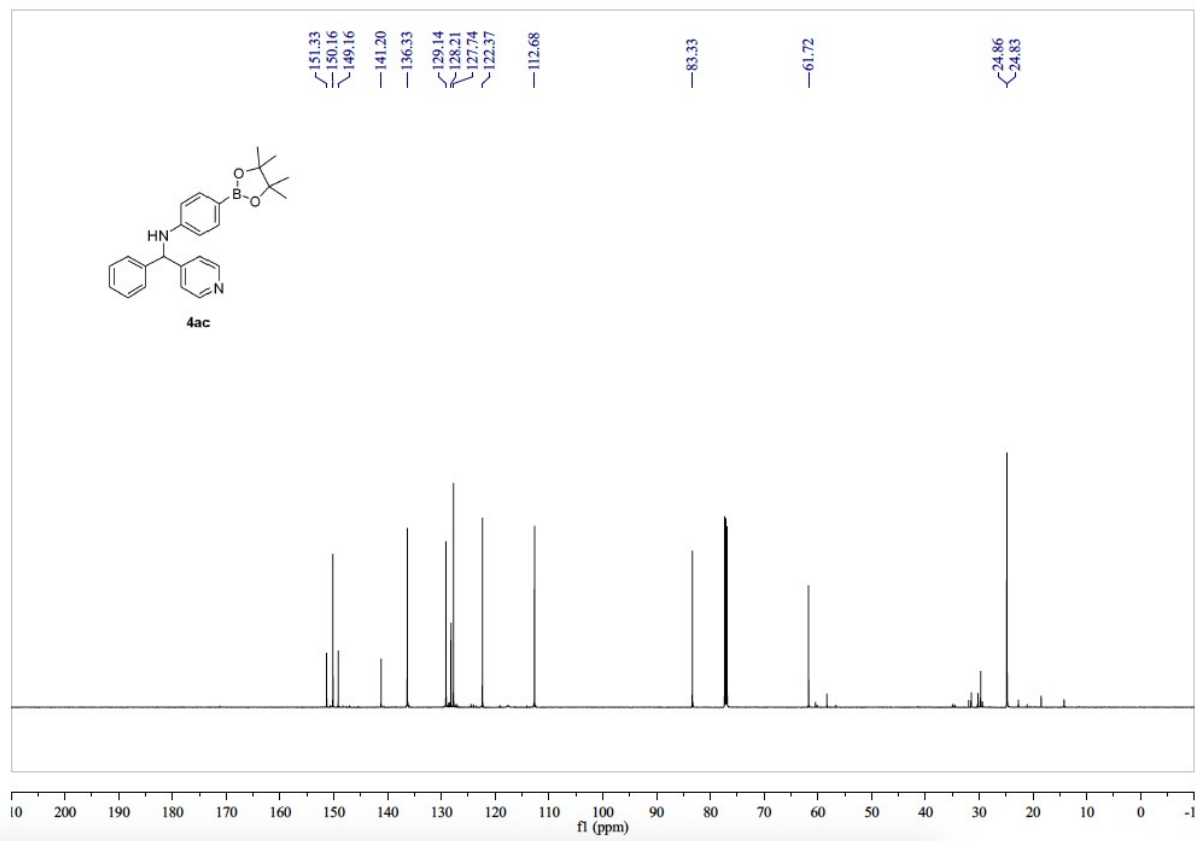

### 4ad: 4-((phenyl(pyridin-4-yl)methyl)amino)phenol

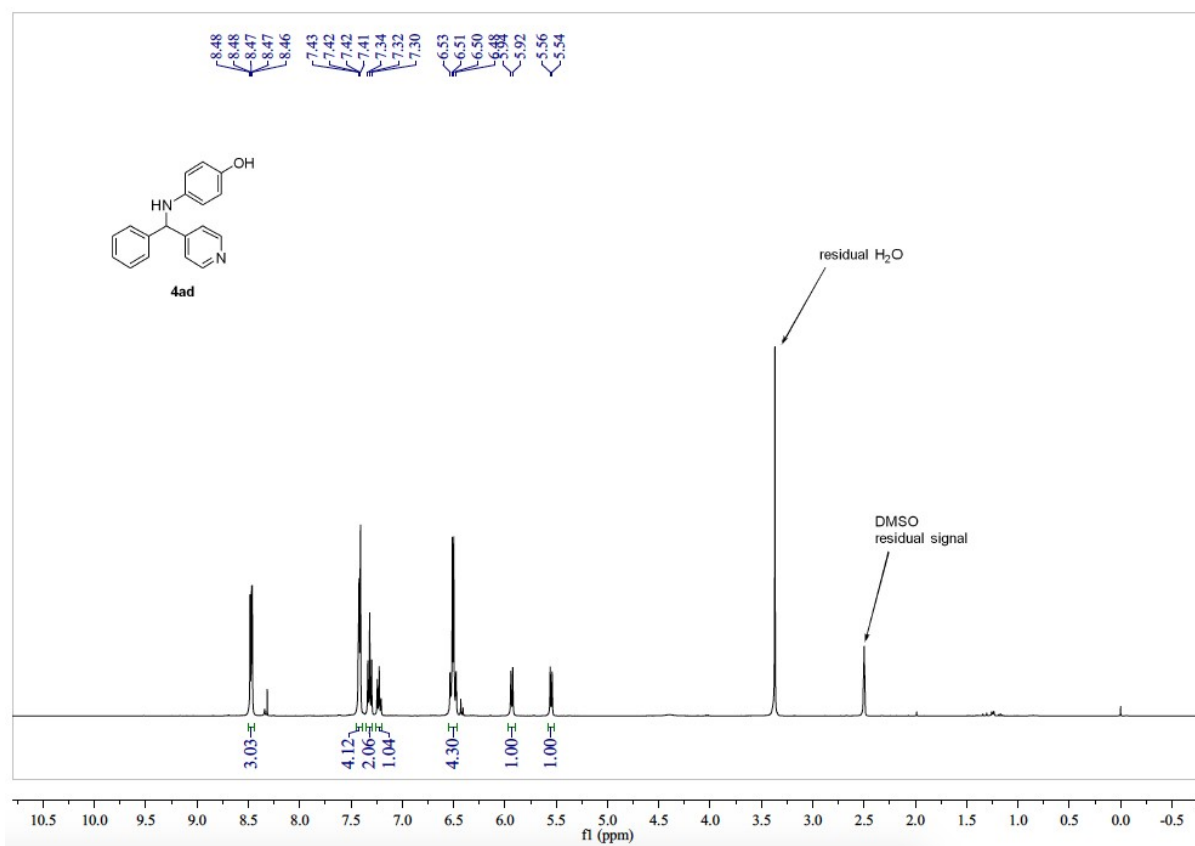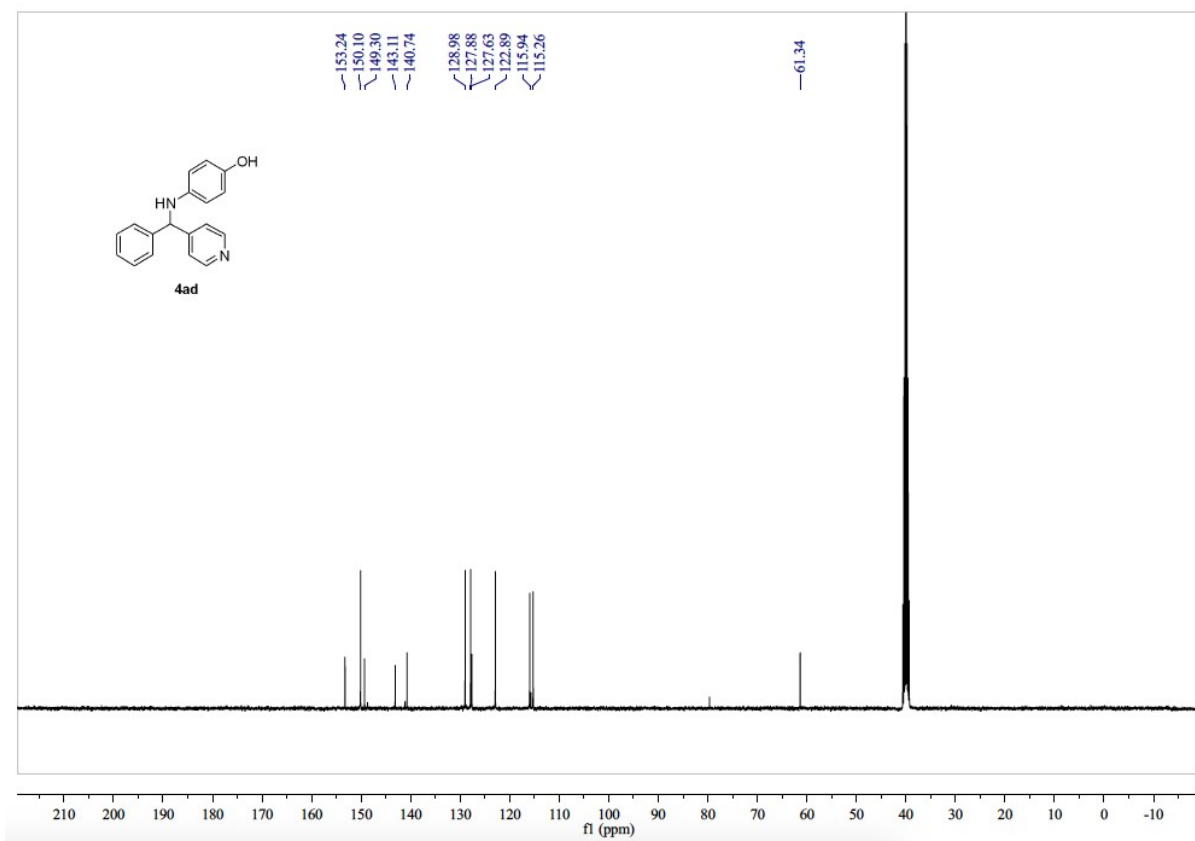

**4ae: *N*<sup>1</sup>,*N*<sup>1</sup>-dimethyl-*N*<sup>4</sup>-(phenyl(pyridin-4-yl)methyl)benzene-1,4-diamine**

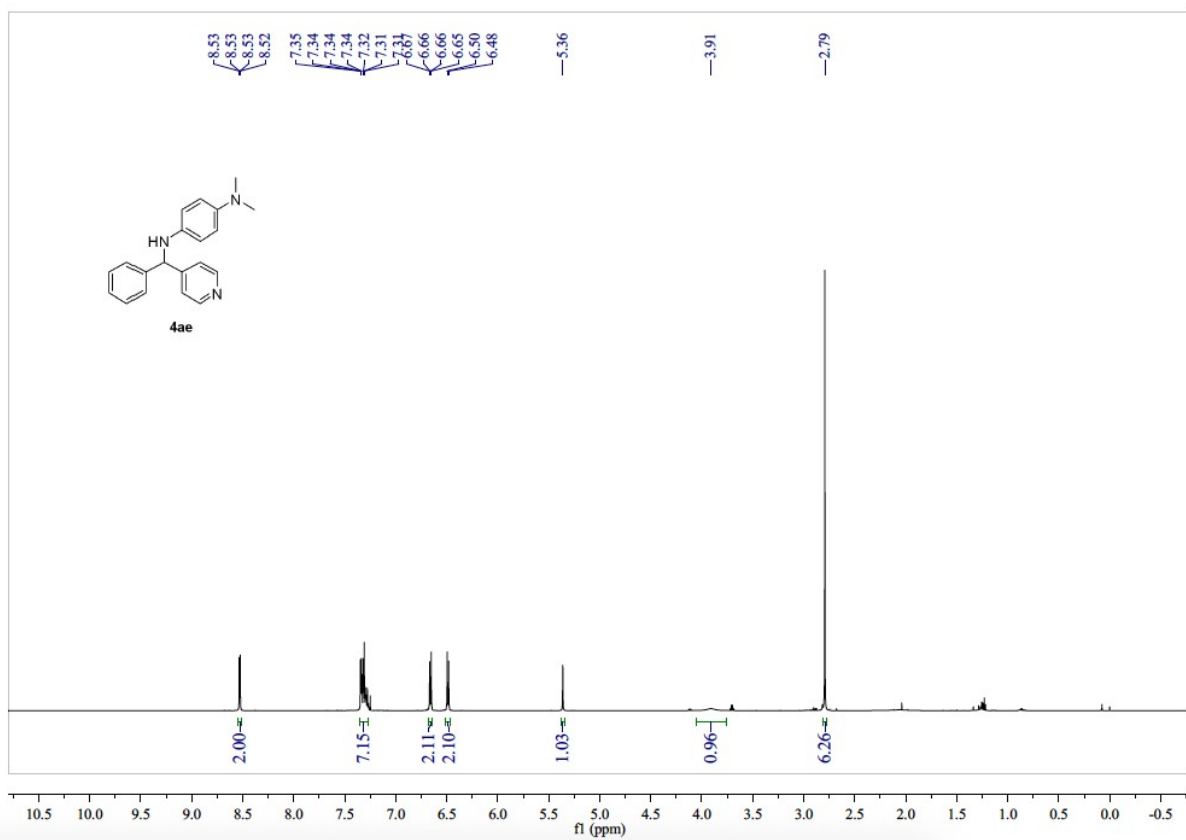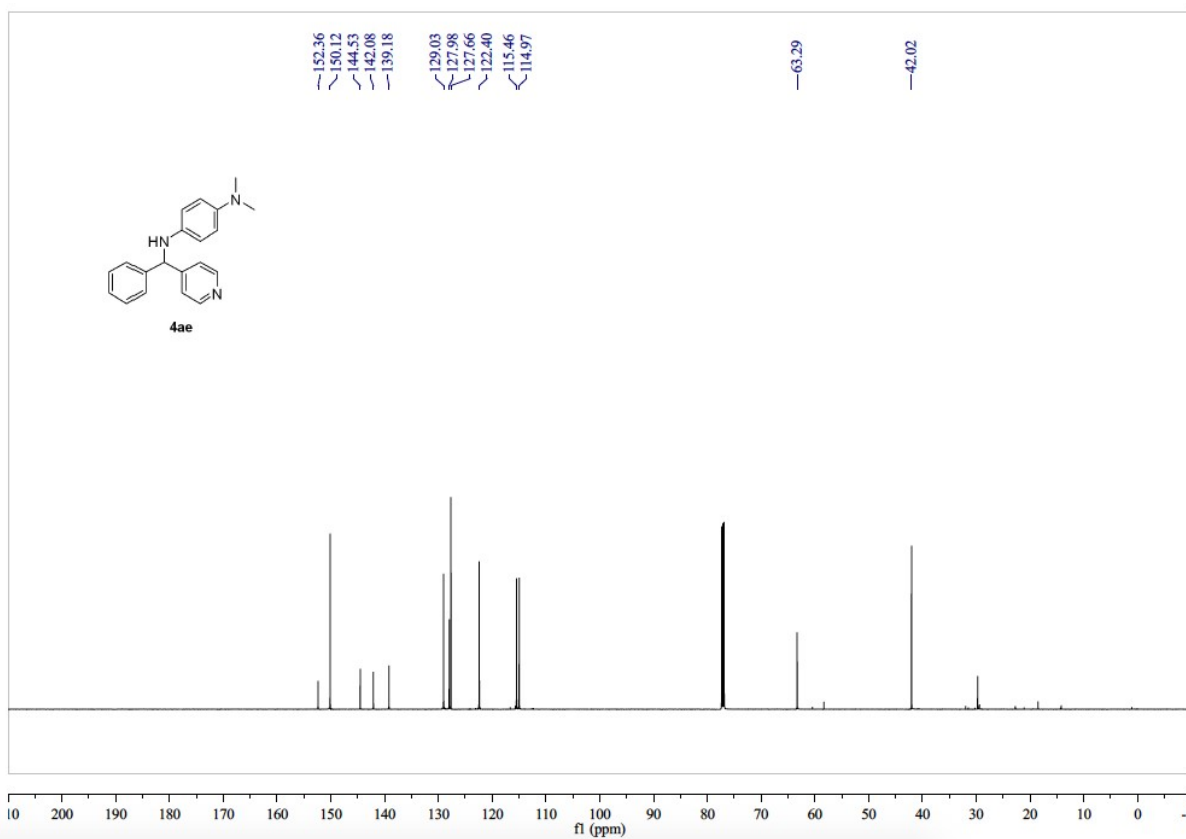

**4af: N-(phenyl(pyridin-4-yl)methyl)naphthalen-2-amine**

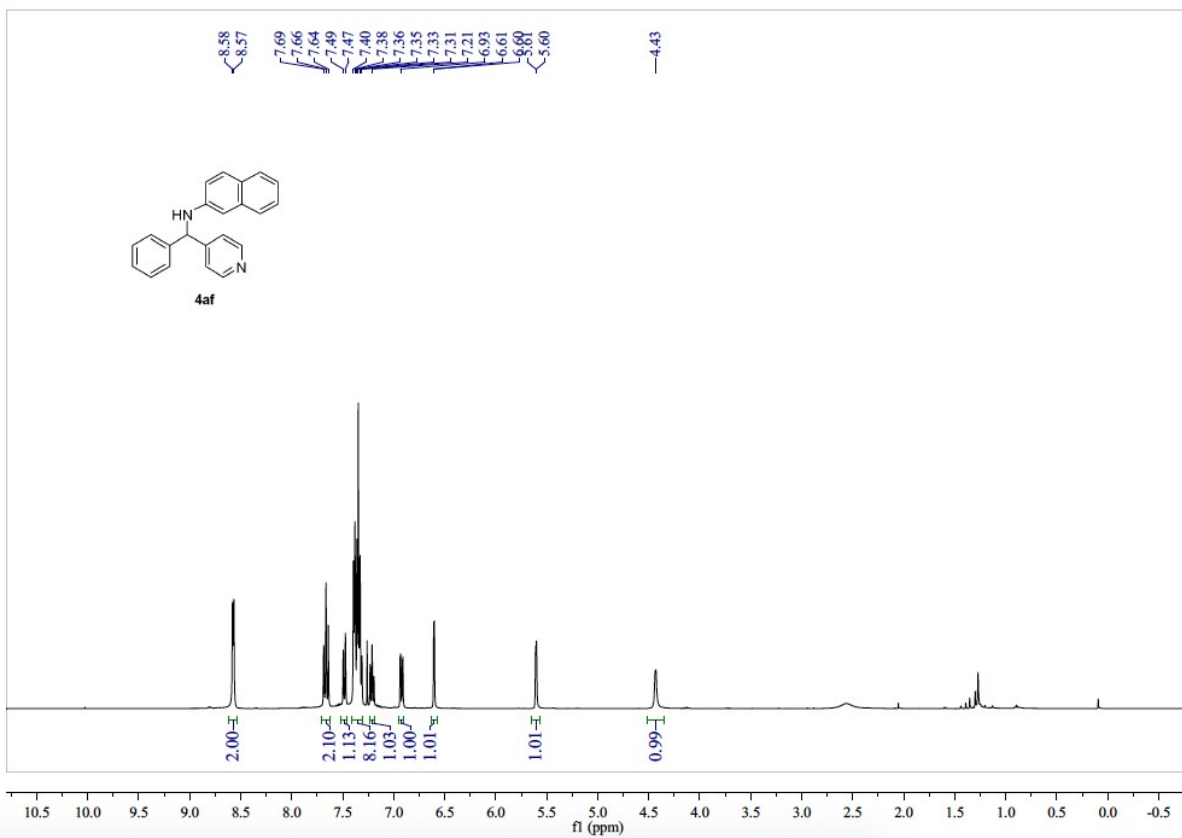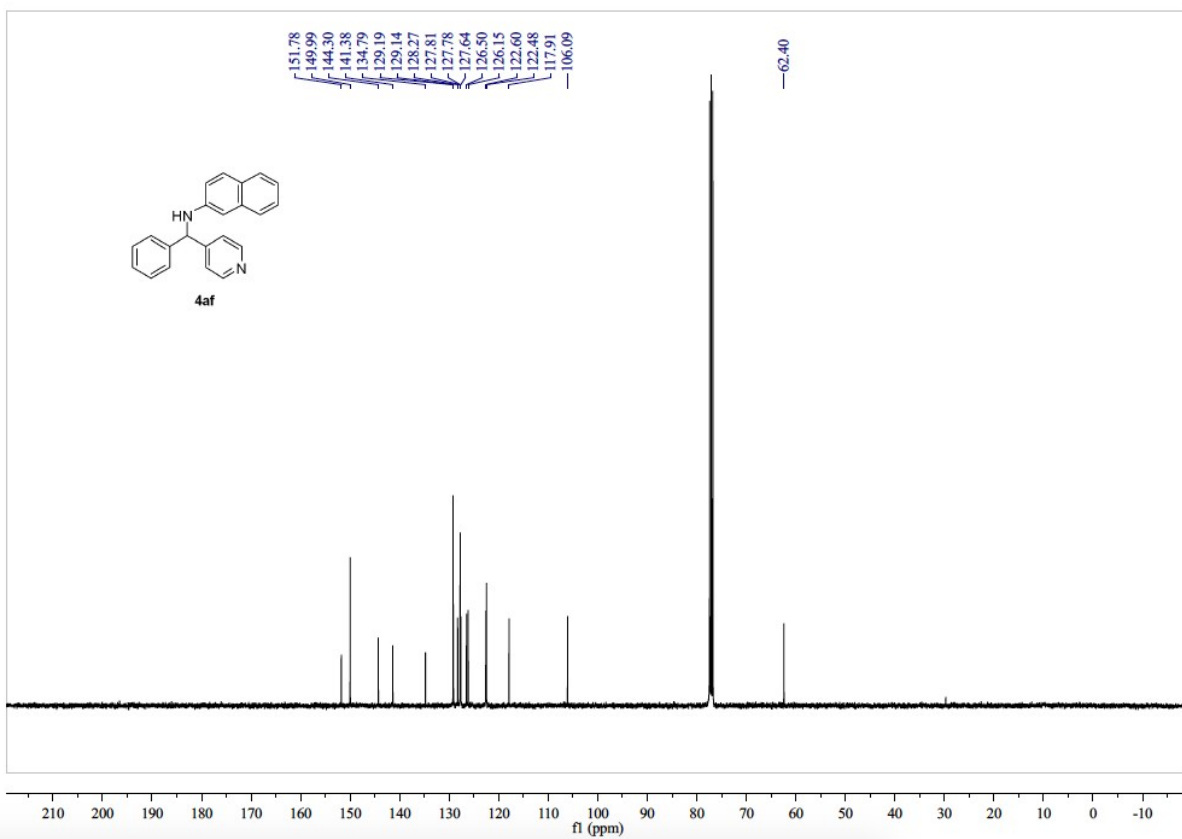

**4ag: *N*-(phenyl(pyridin-4-yl)methyl)-1*H*-indol-5-amine**

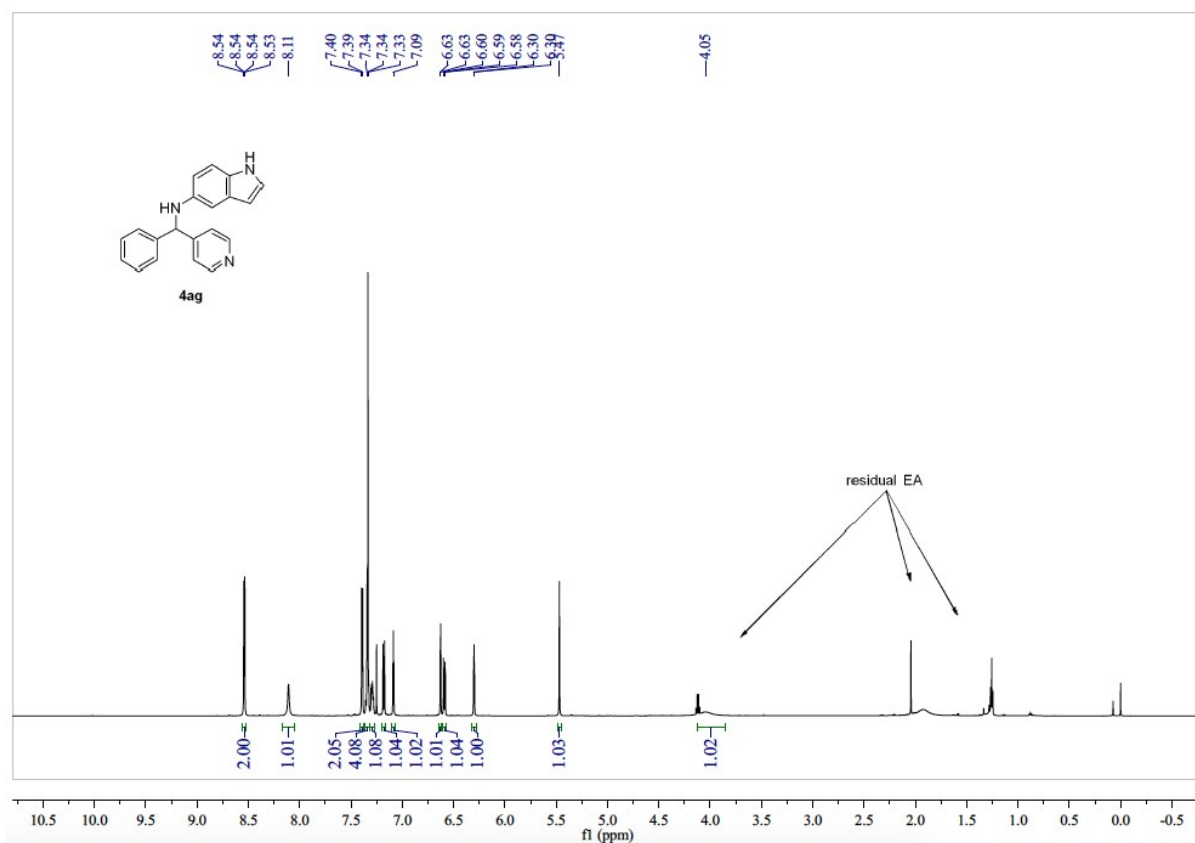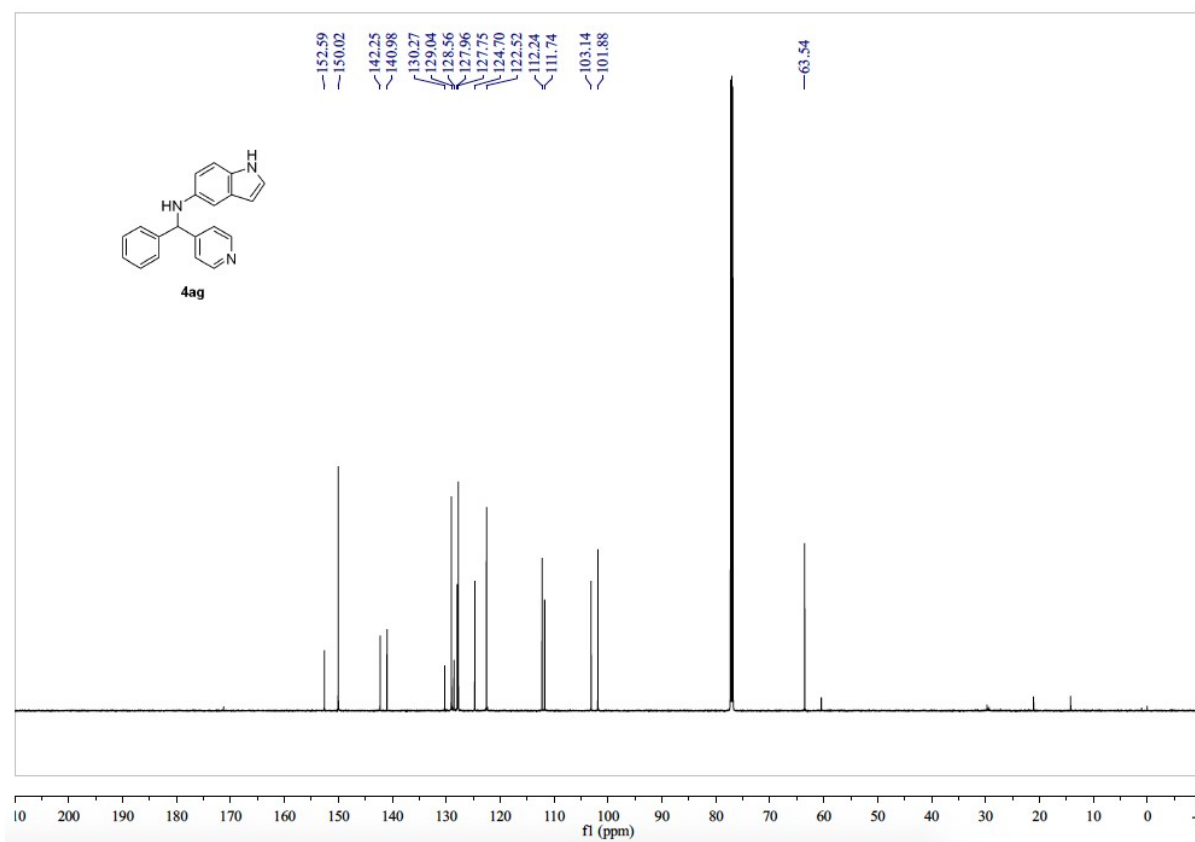

**4ah: N-(phenyl(pyridin-4-yl)methyl)quinolin-5-amine**

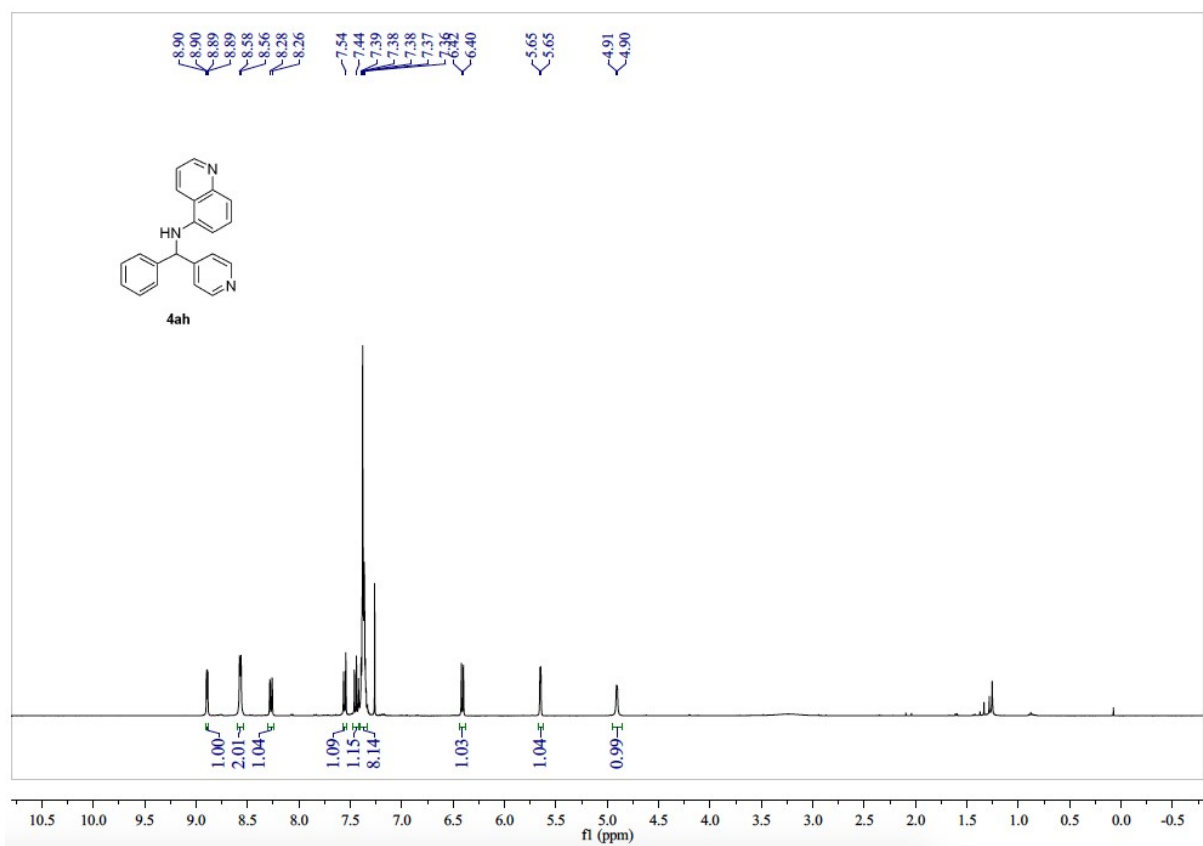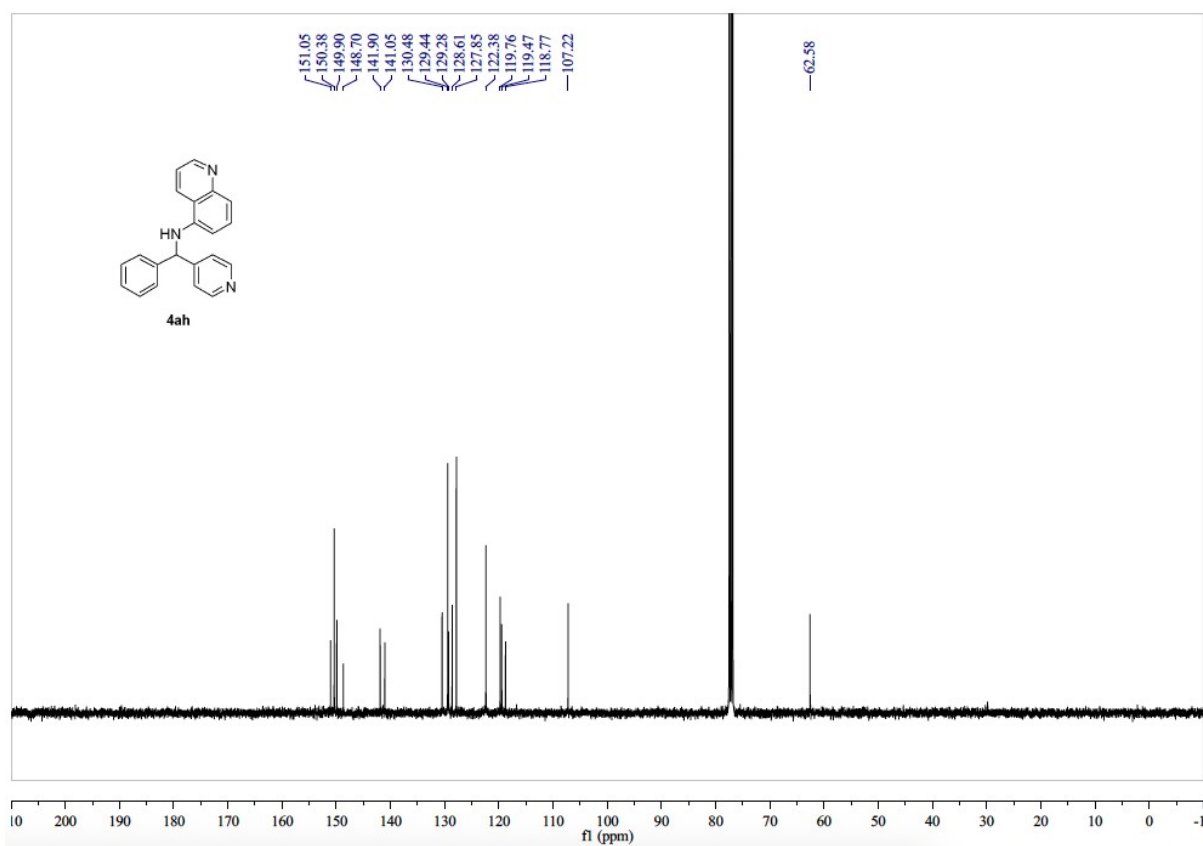

**4ai: N-ethyl-N-(phenyl(pyridin-4-yl)methyl)ethanamine**

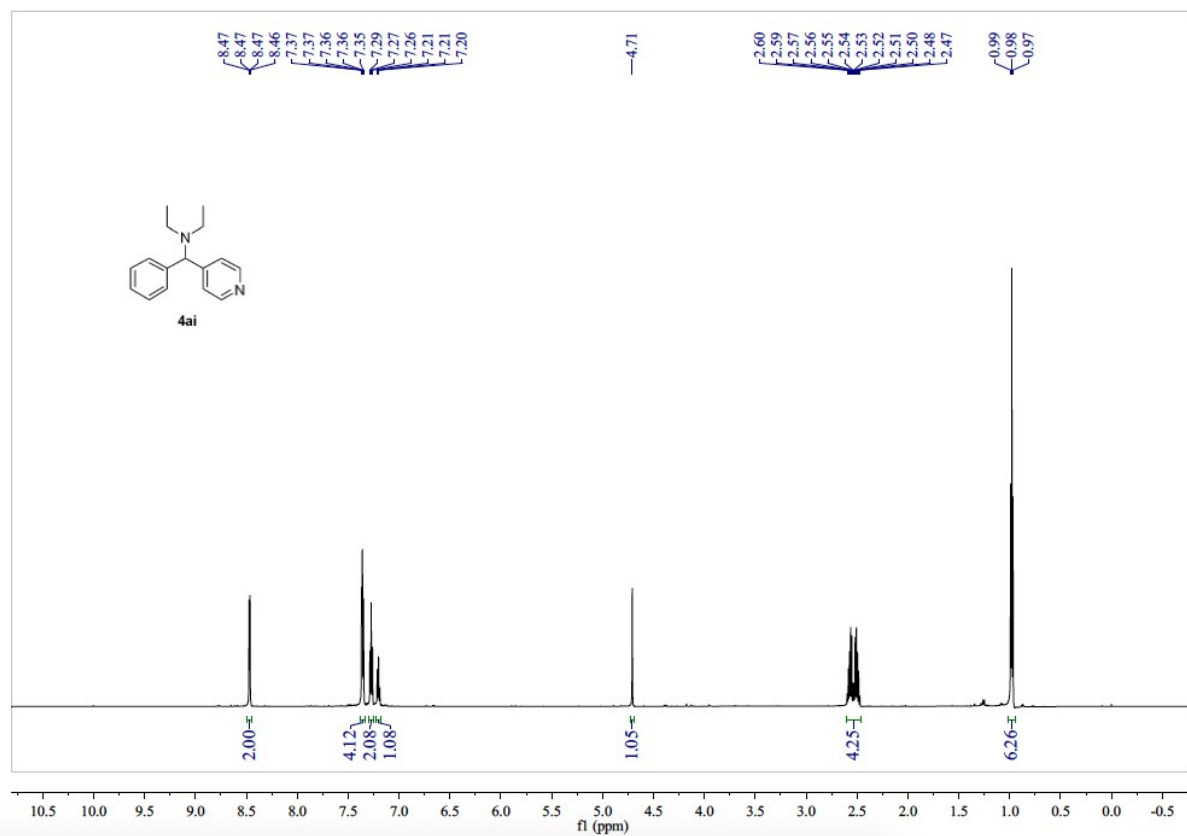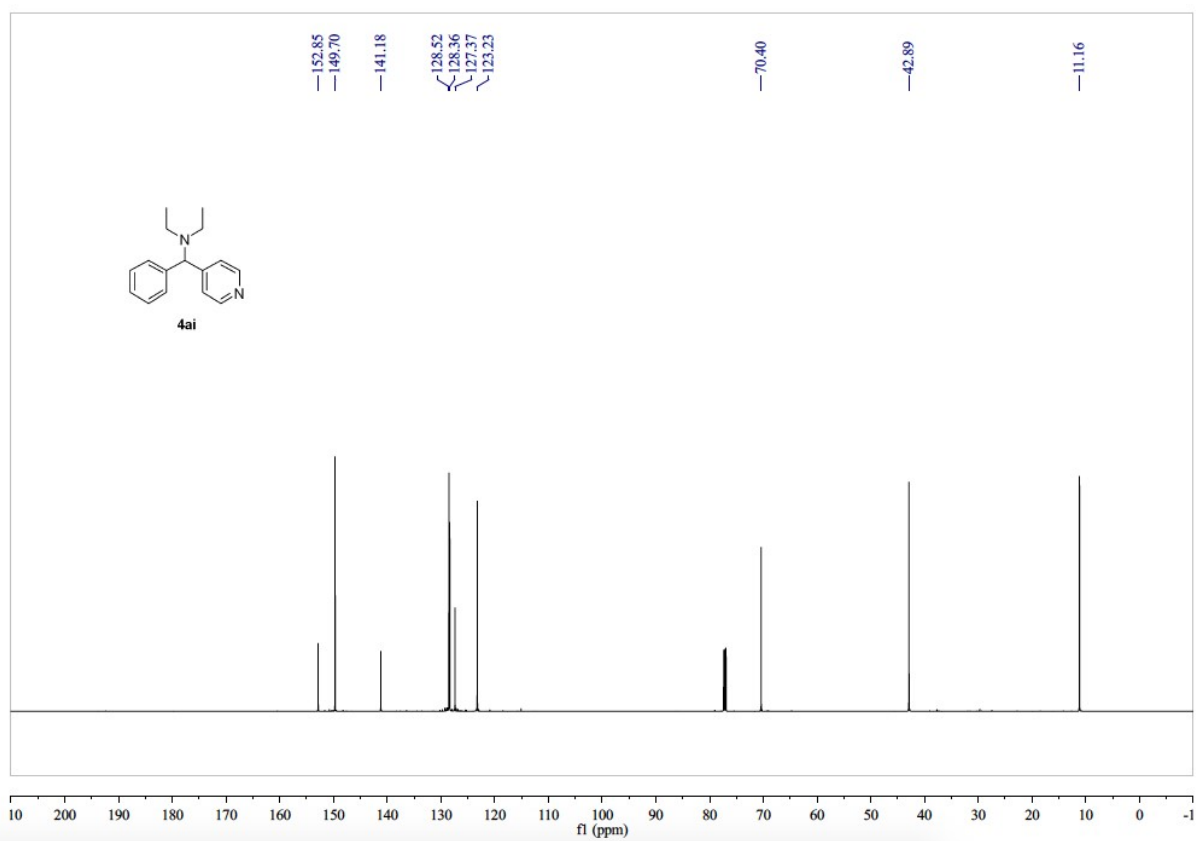



**4aj: N-benzyl-N-methyl-1-phenyl-1-(pyridin-4-yl)methanamine**

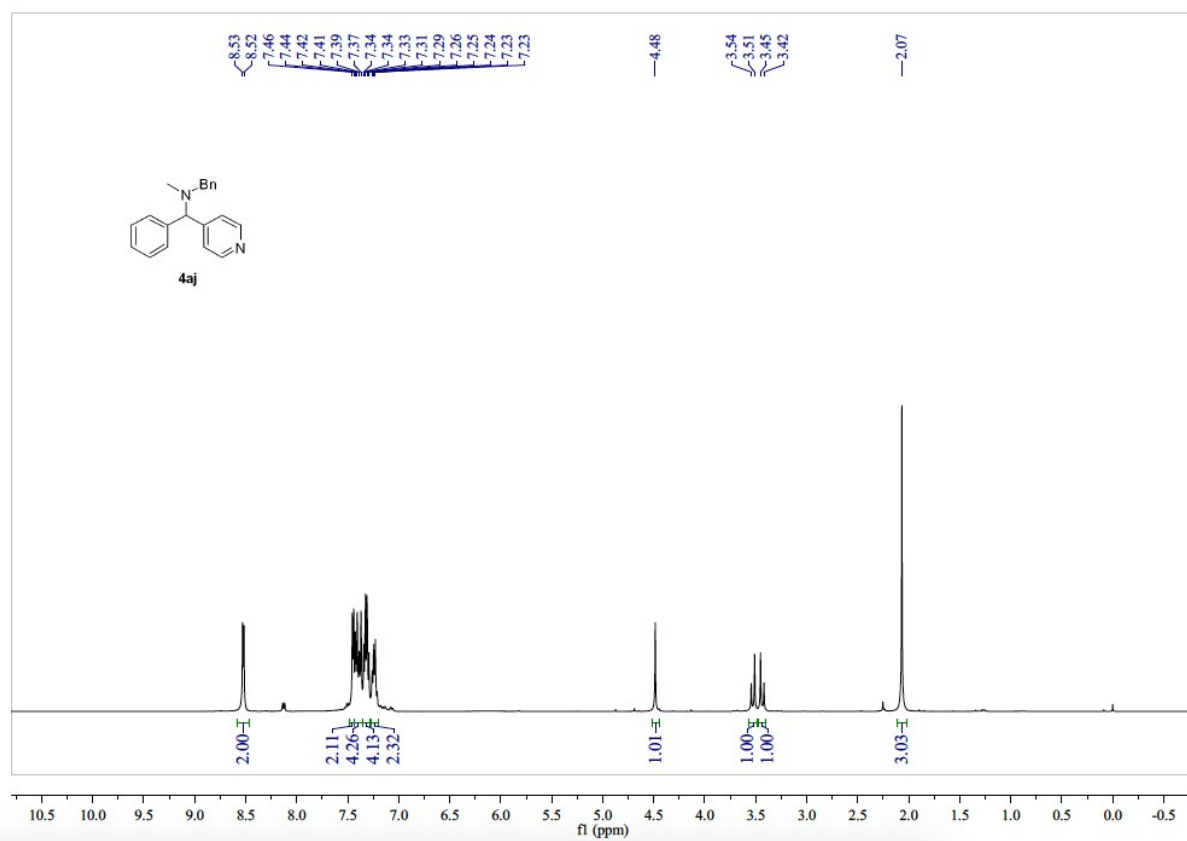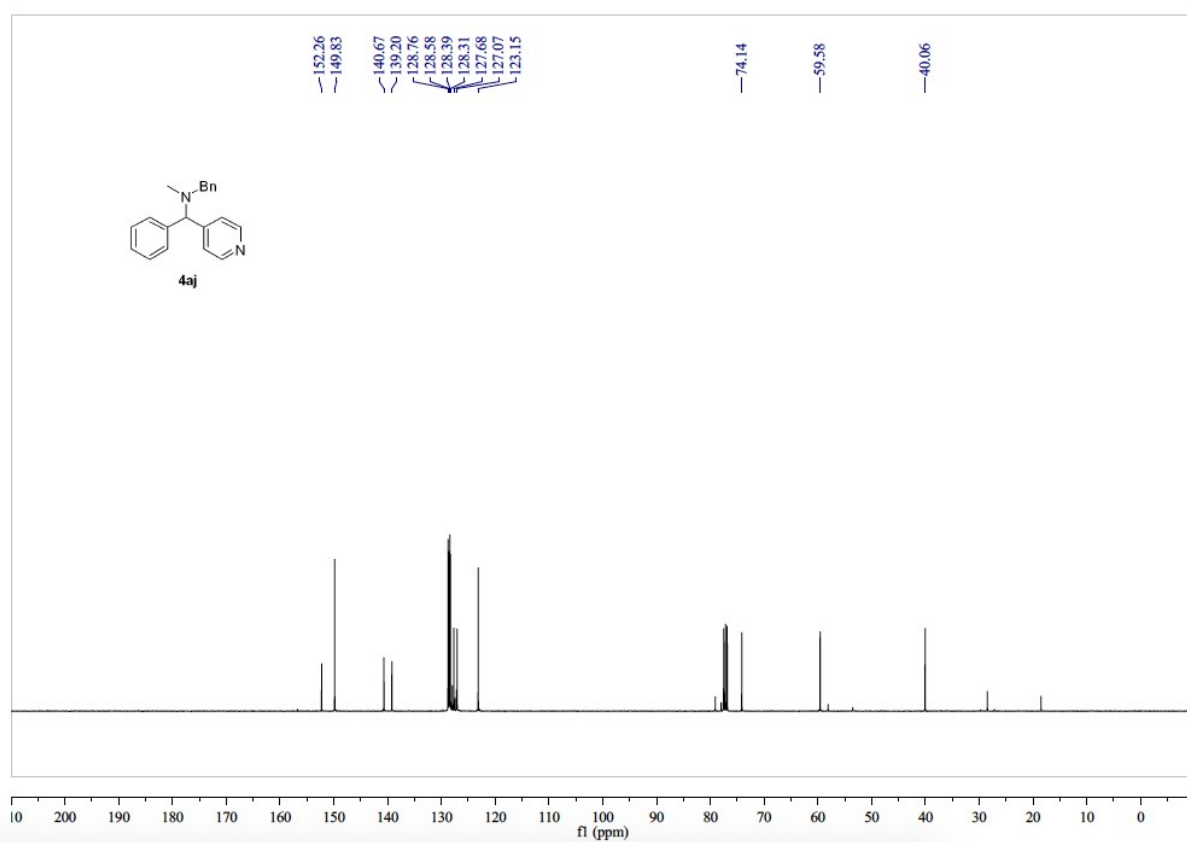

**4ak: *N,N*-dibenzyl-1-phenyl-1-(pyridin-4-yl)methanamine**

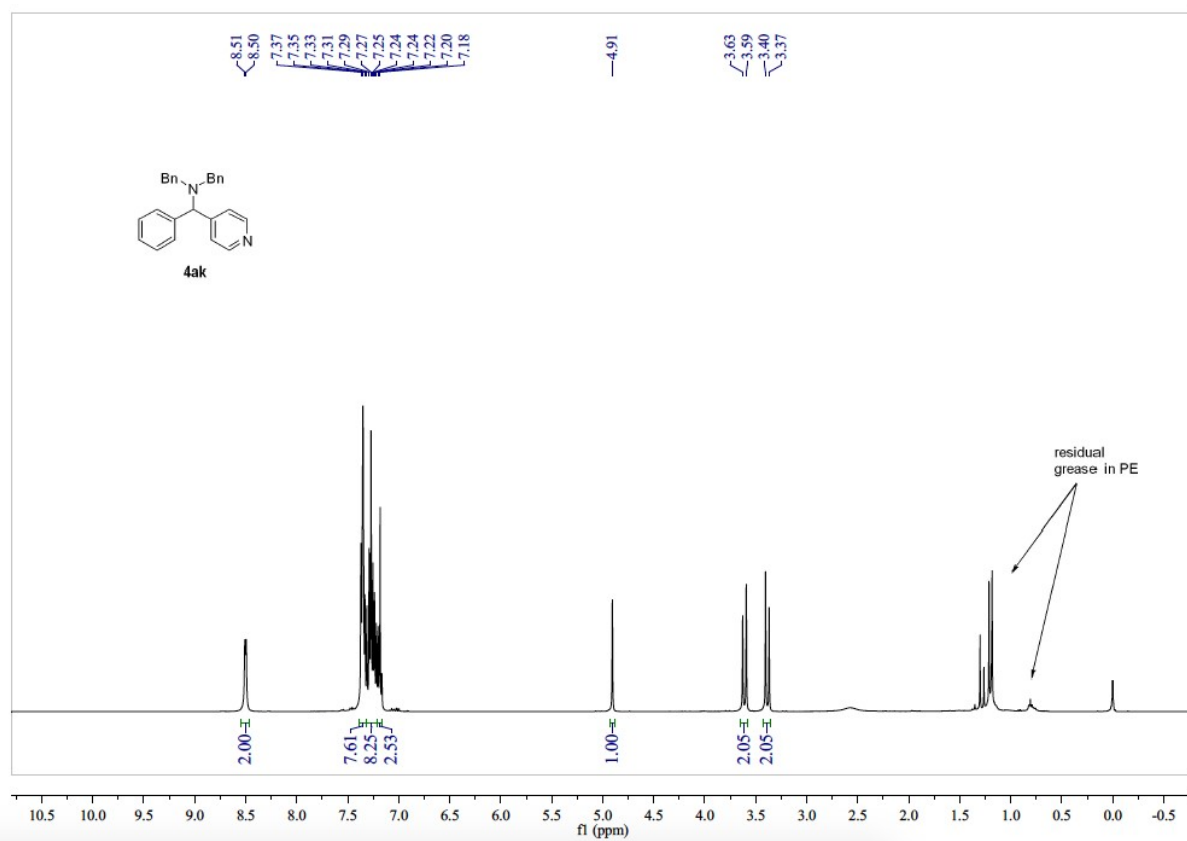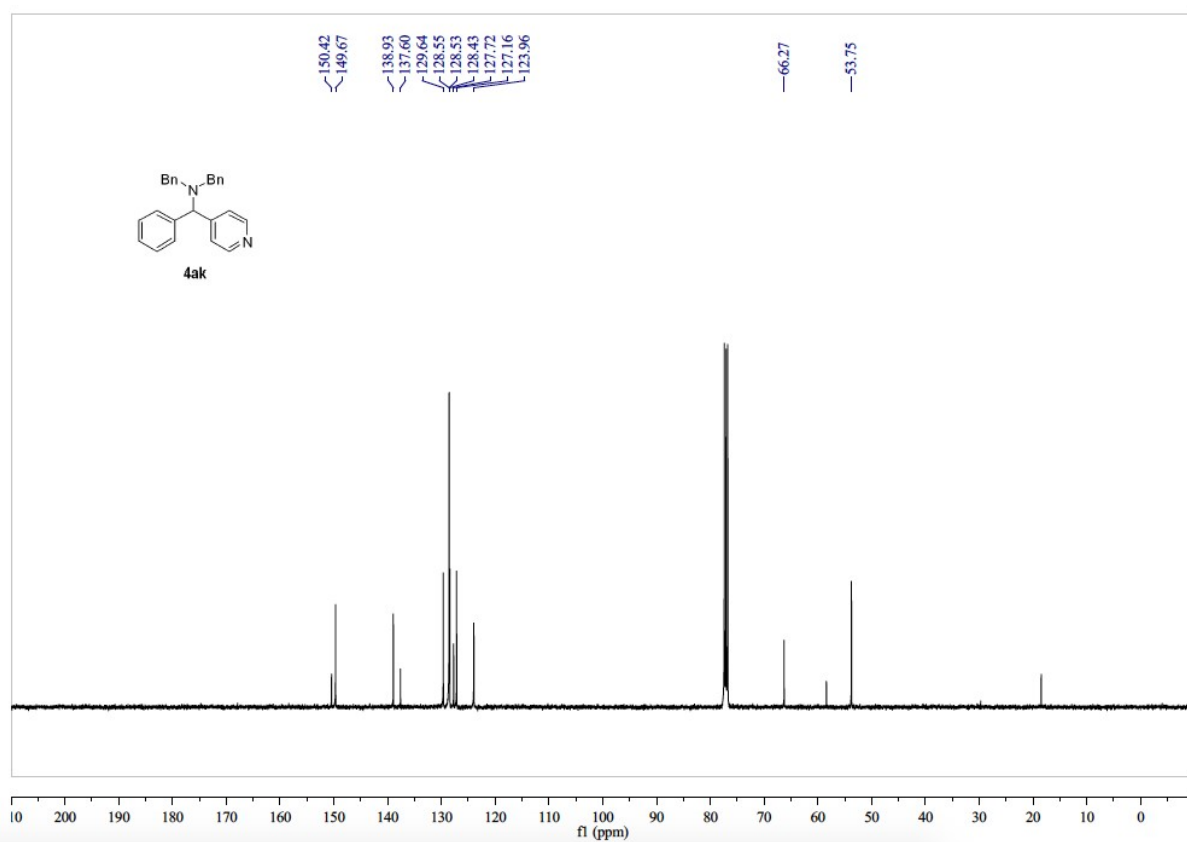

**4al: N-methyl-N-(naphthalen-1-ylmethyl)-1-phenyl-1-(pyridin-4-yl)methanamine**

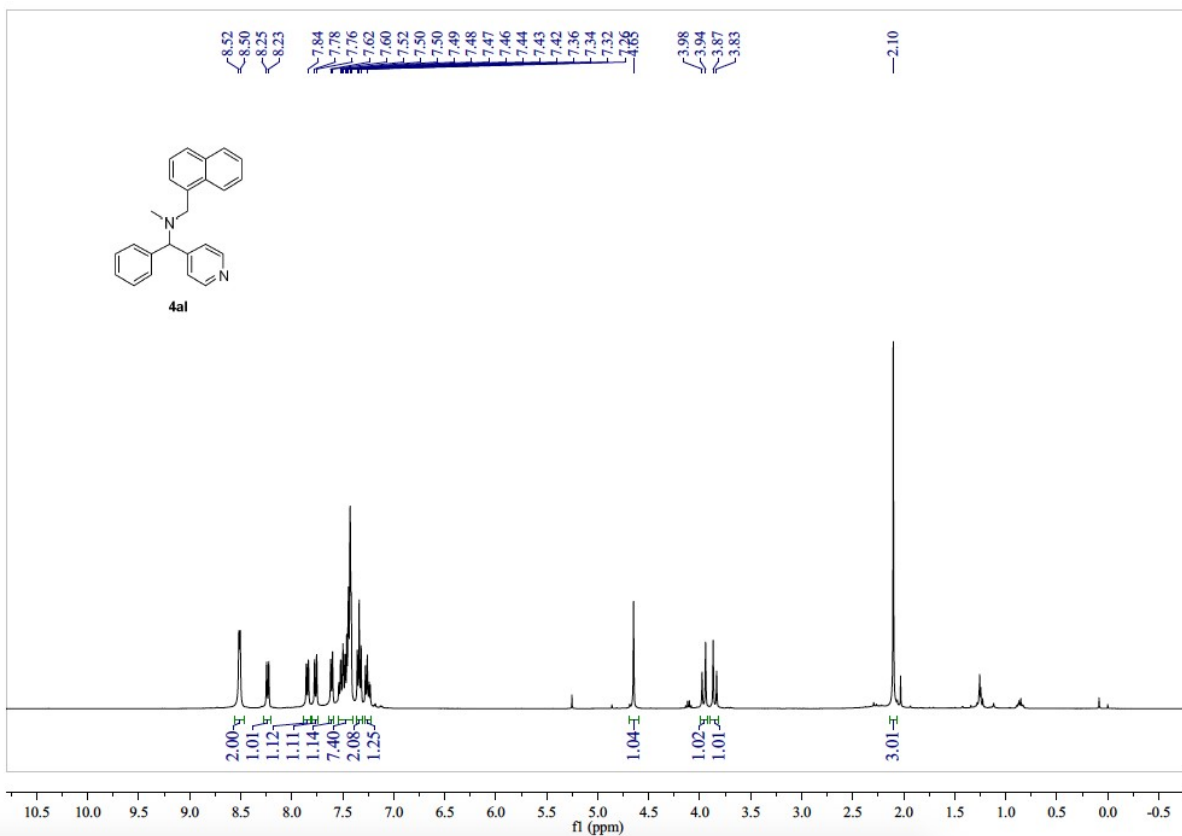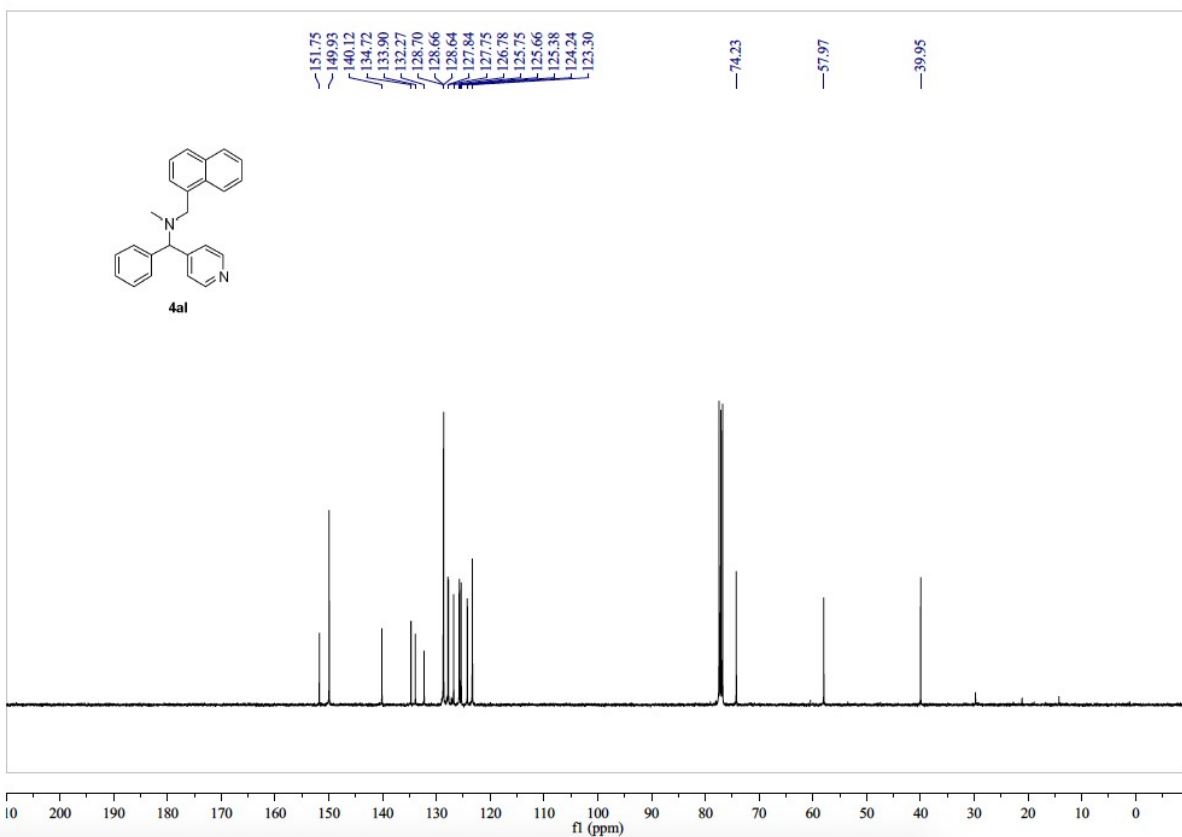

### 4am: 4-(phenyl(piperidin-1-yl)methyl)pyridine

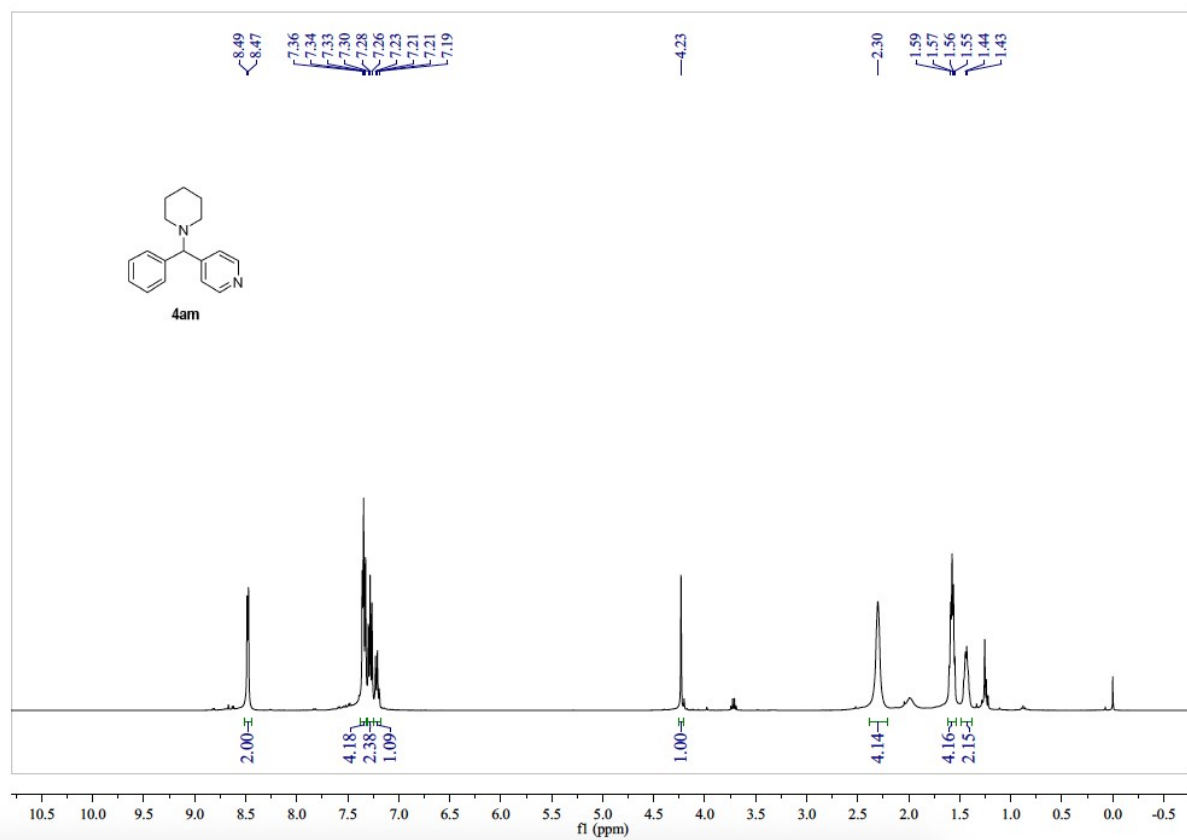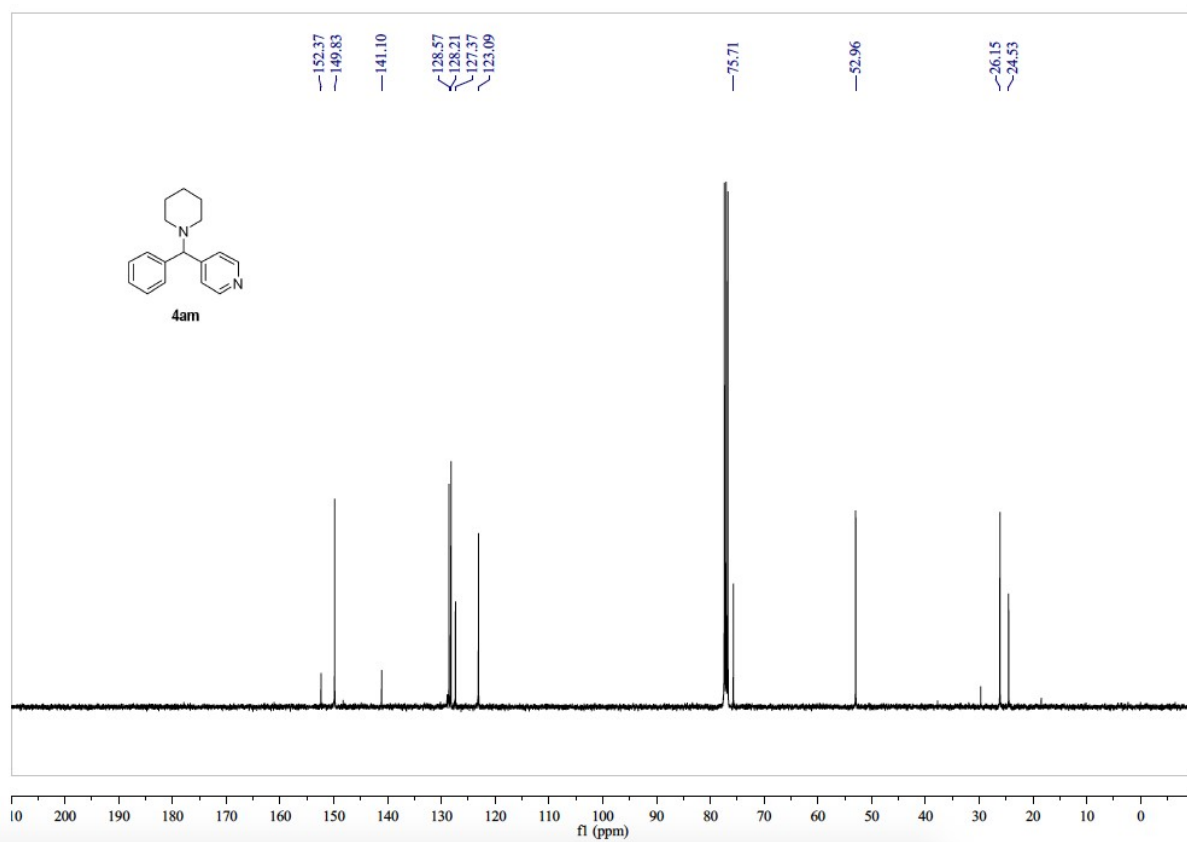

**4an: 4-(phenyl(pyridin-4-yl)methyl)morpholine**

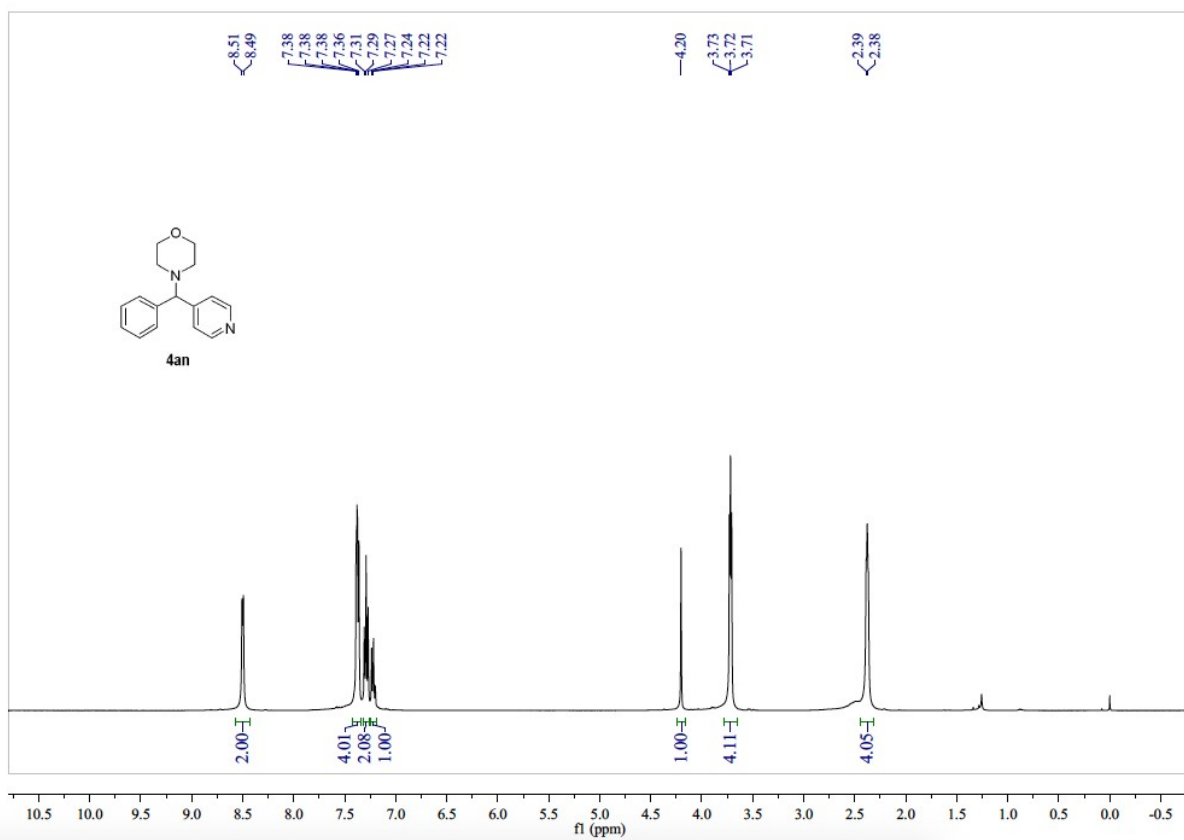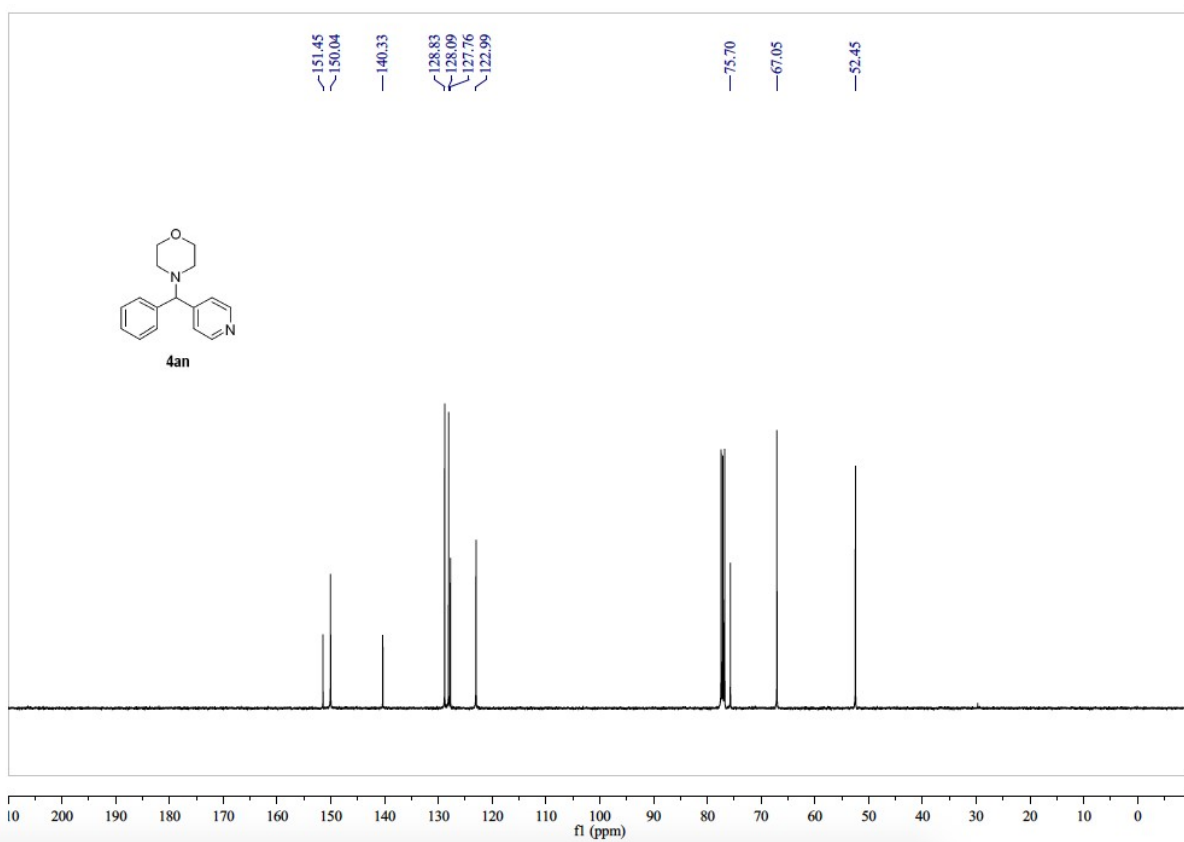

### 4ao: 4-(phenyl(pyridin-4-yl)methyl)thiomorpholine

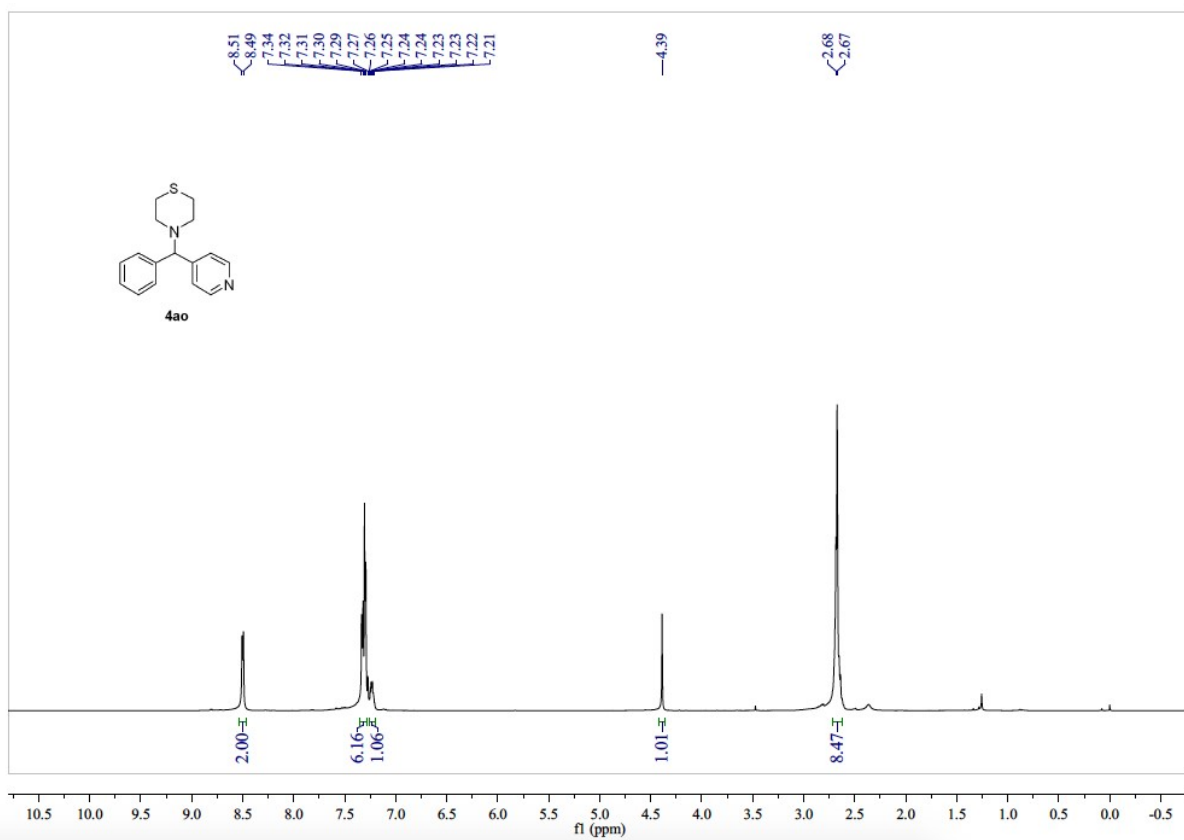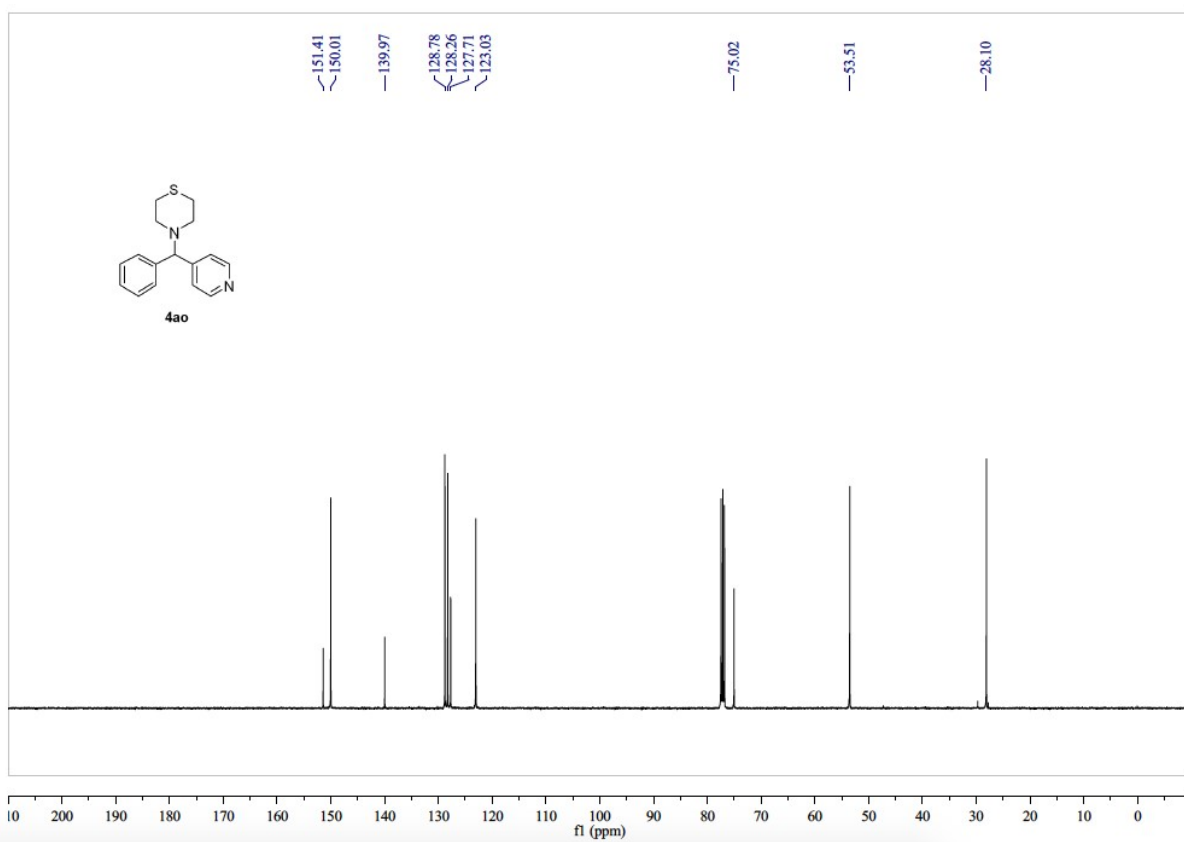

### 4ap: 4-((4-bromopiperidin-1-yl)(phenyl)methyl)pyridine

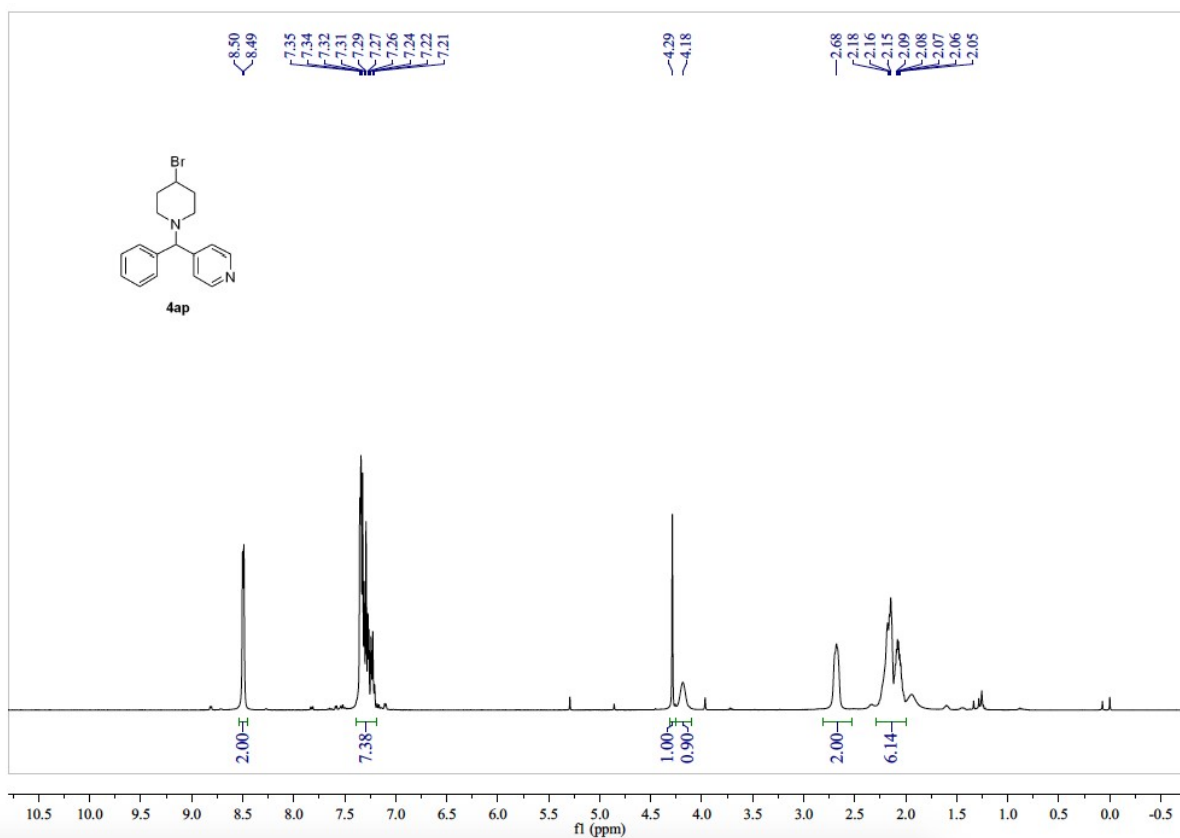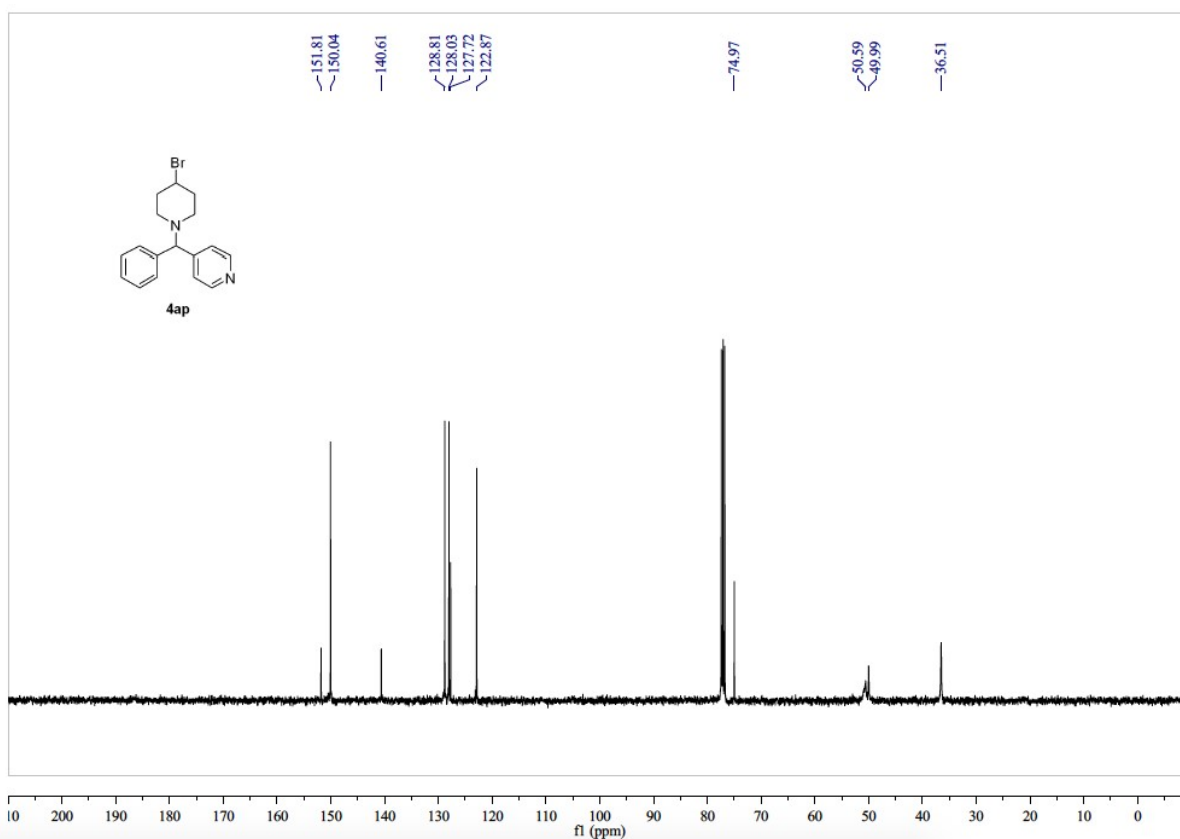

### 4aq: 1-phenyl-4-(phenyl(pyridin-4-yl)methyl)piperazine

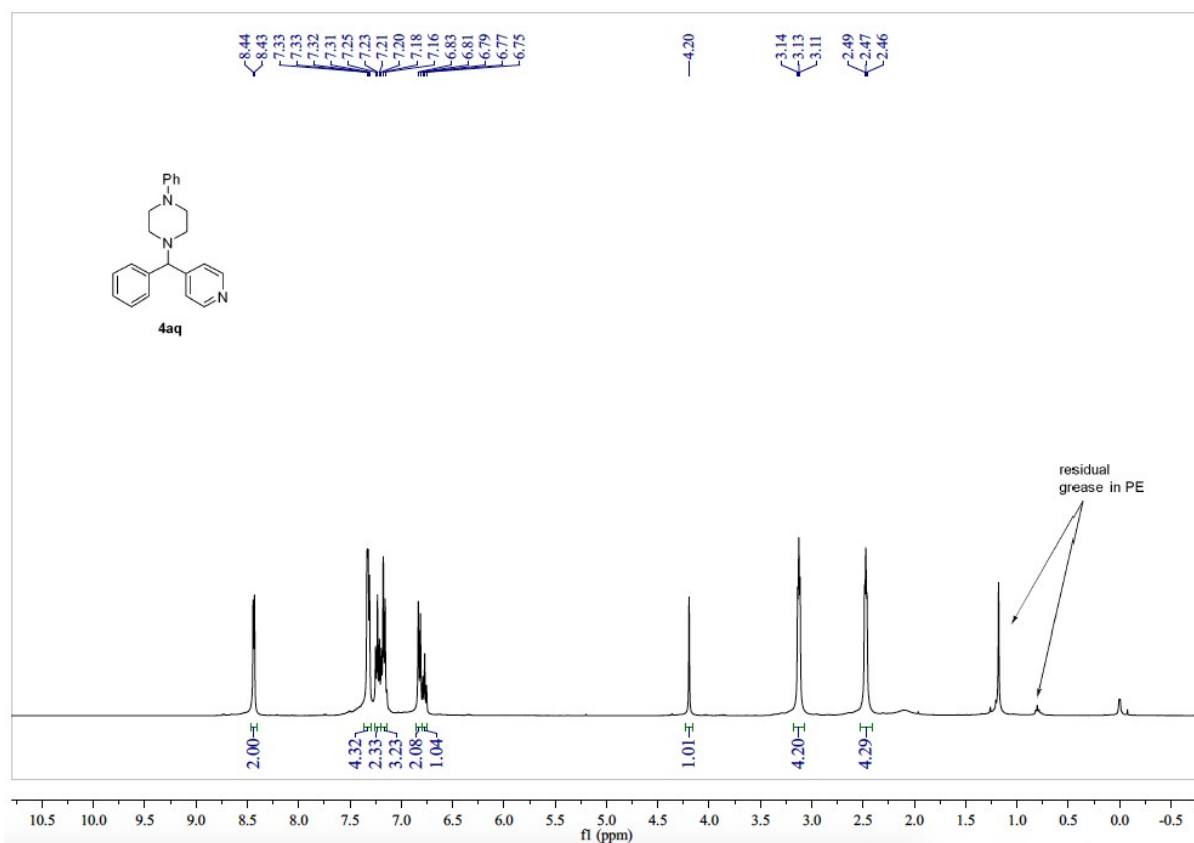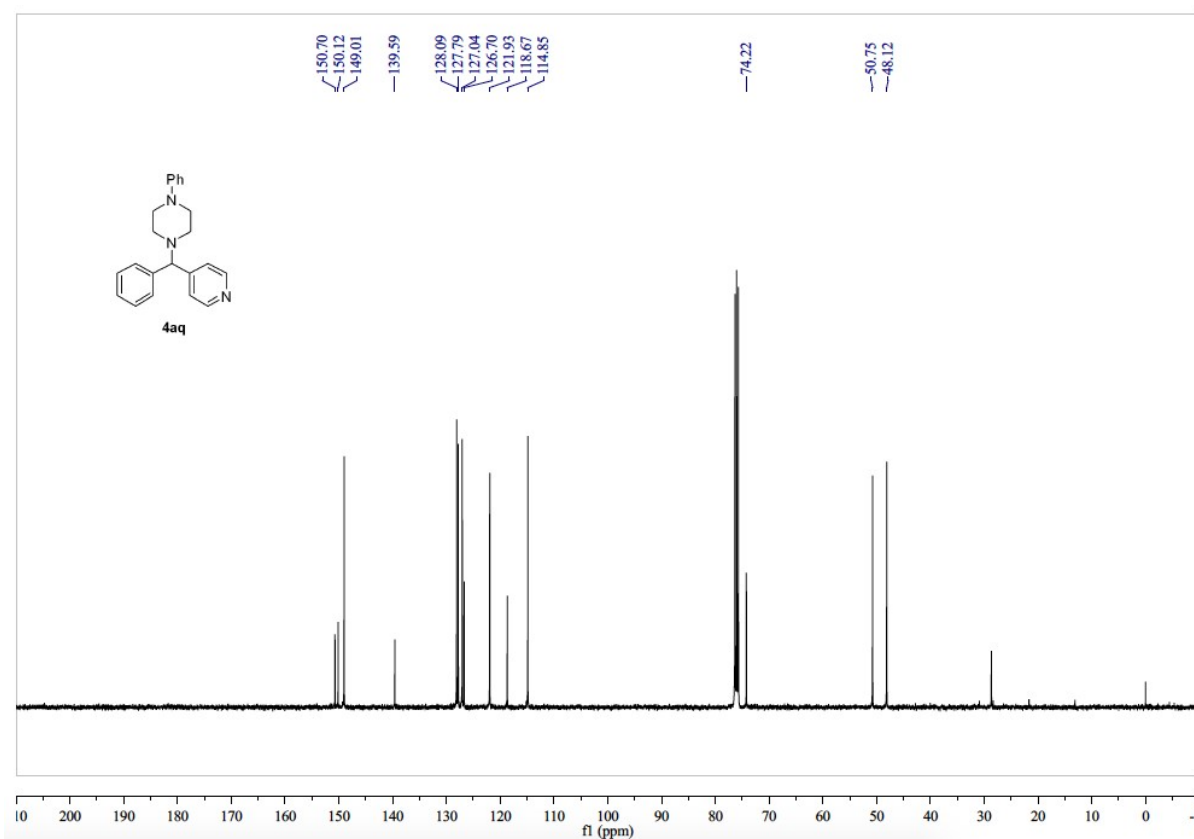



### 4ar: 2-(phenyl(pyridin-4-yl)methyl)-1,2,3,4-tetrahydroisoquinoline

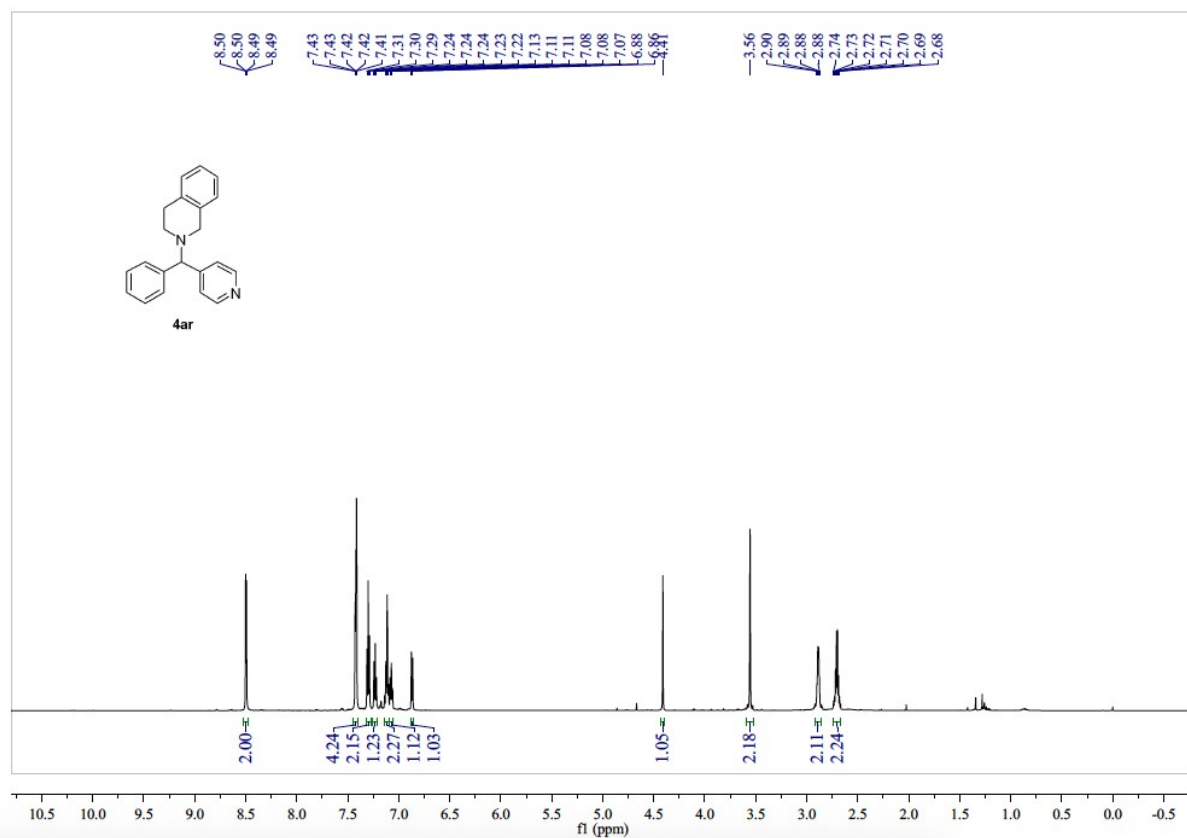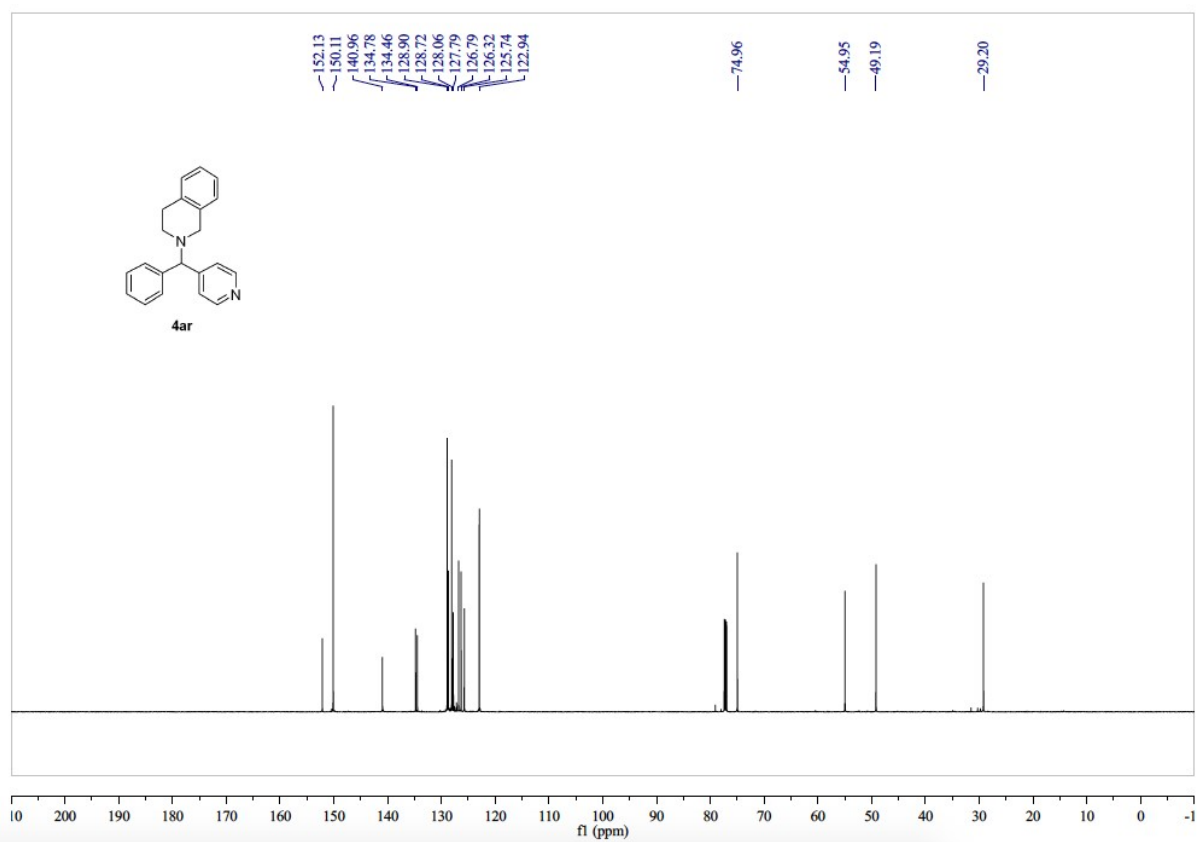

**4as: 1-((3'-methoxy-[1,1'-biphenyl]-4-yl)(pyridin-4-yl)methyl)-4-methylpiperazine**

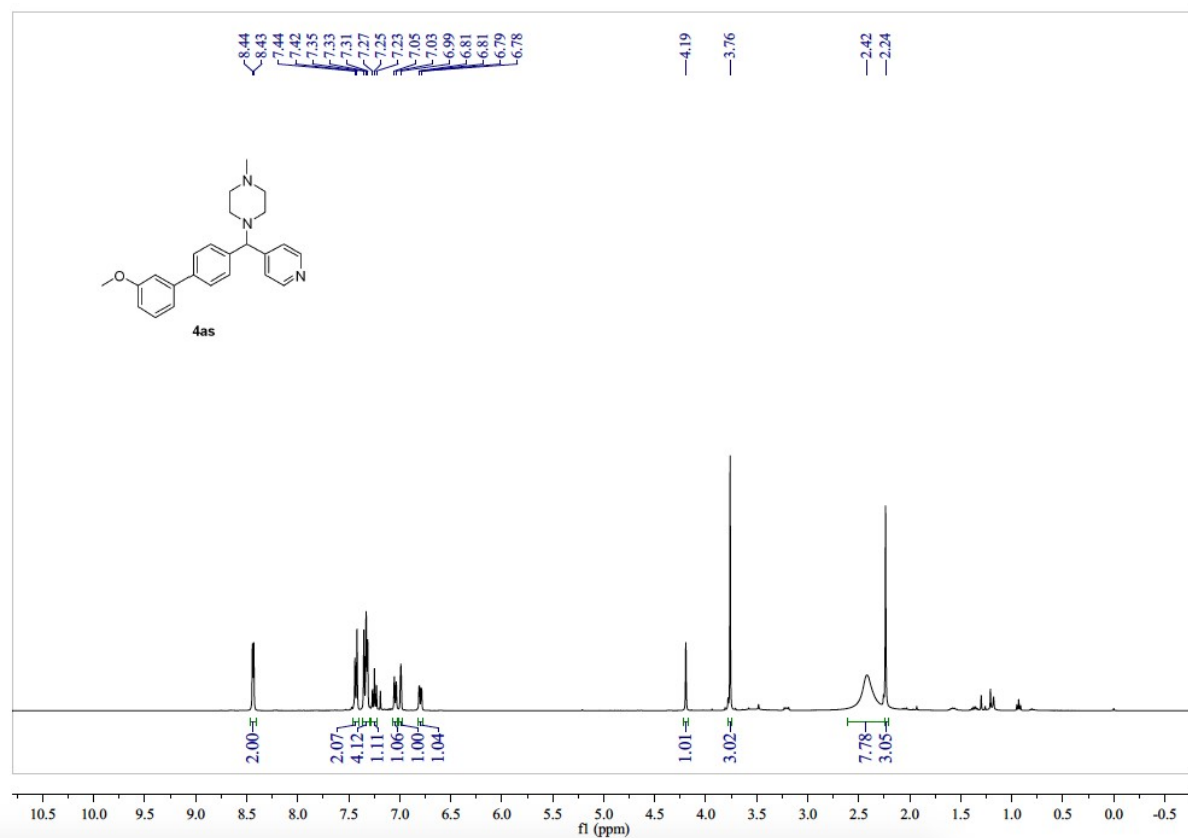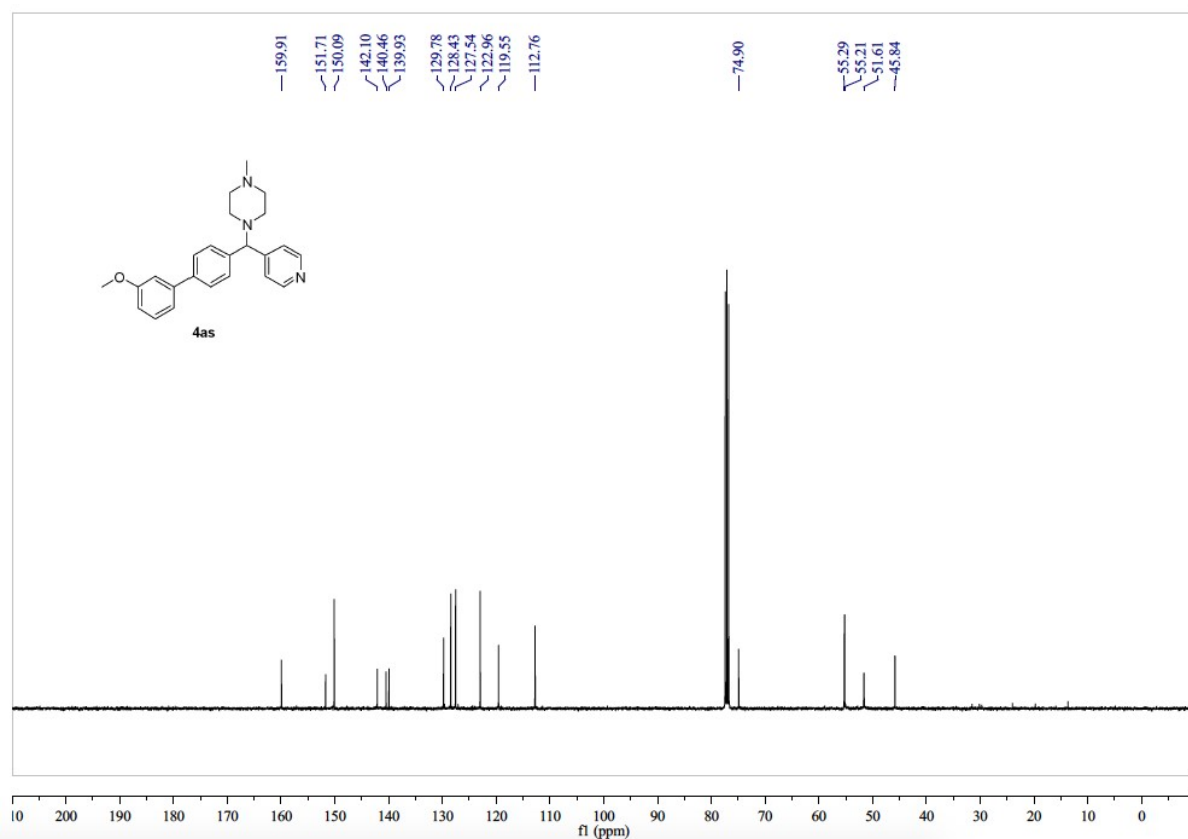

### 5a: 2-((phenylamino)(pyridin-4-yl)methyl)phenol

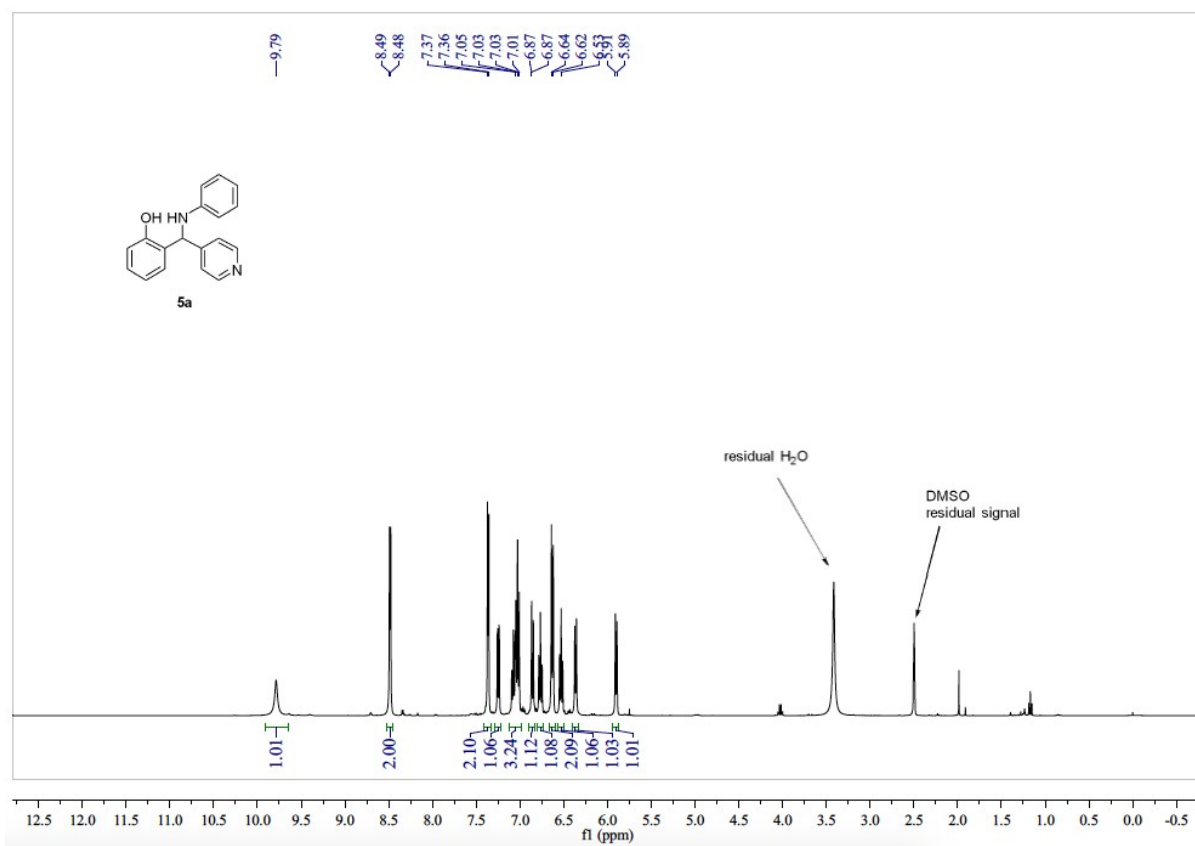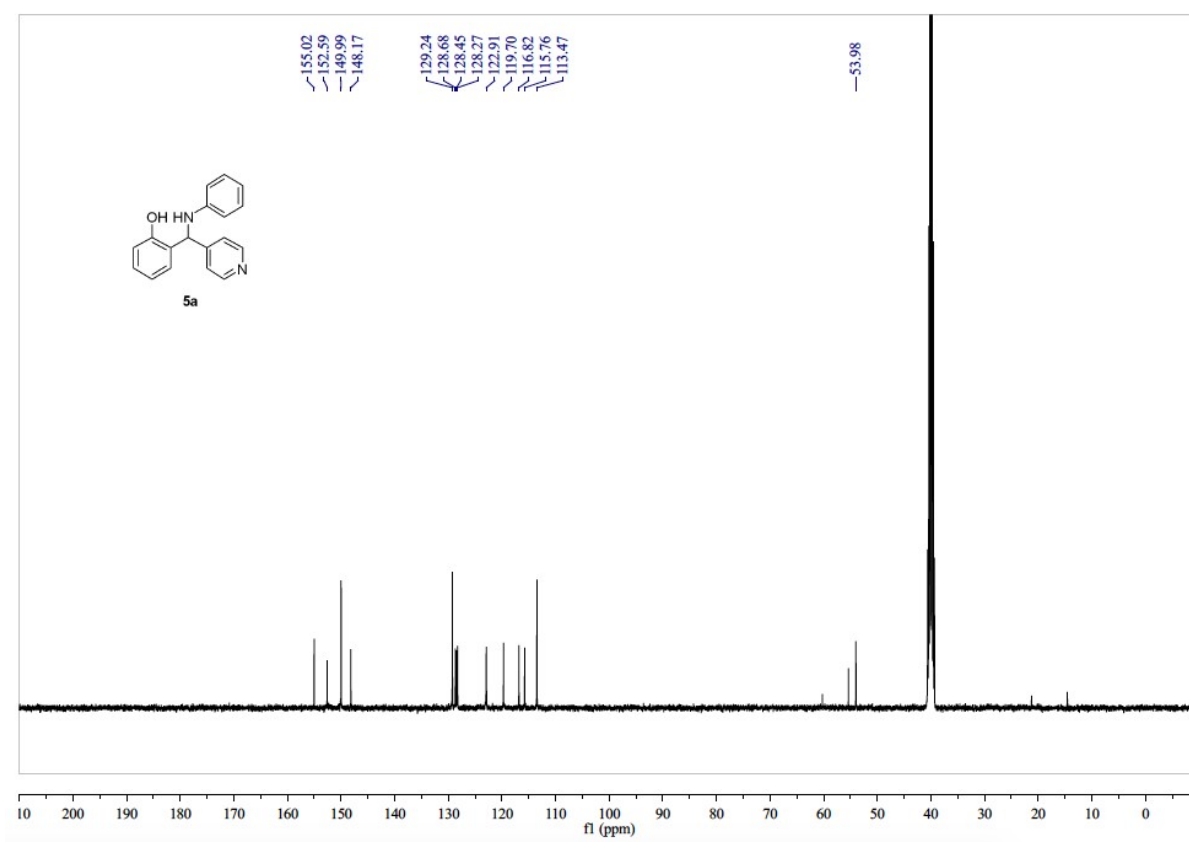

**5b: N-(pyridin-4-yl(3-(trifluoromethoxy)phenyl)methyl)aniline**

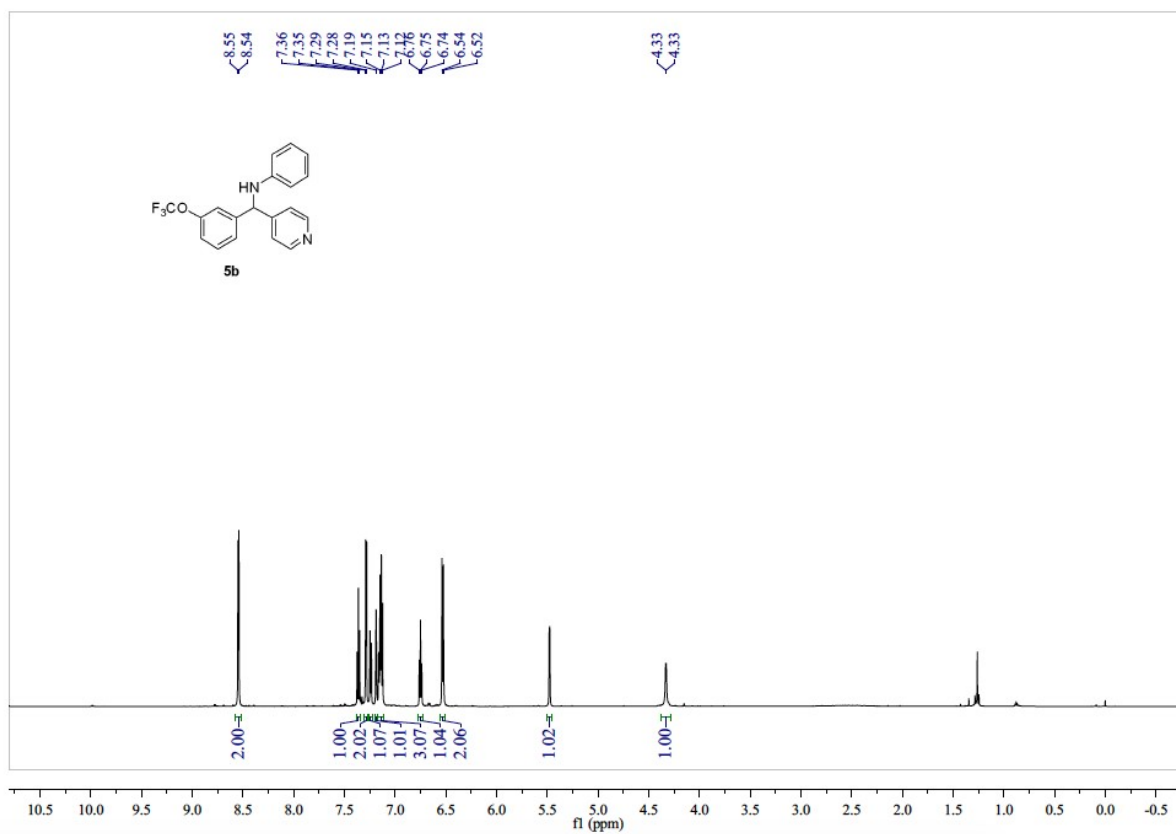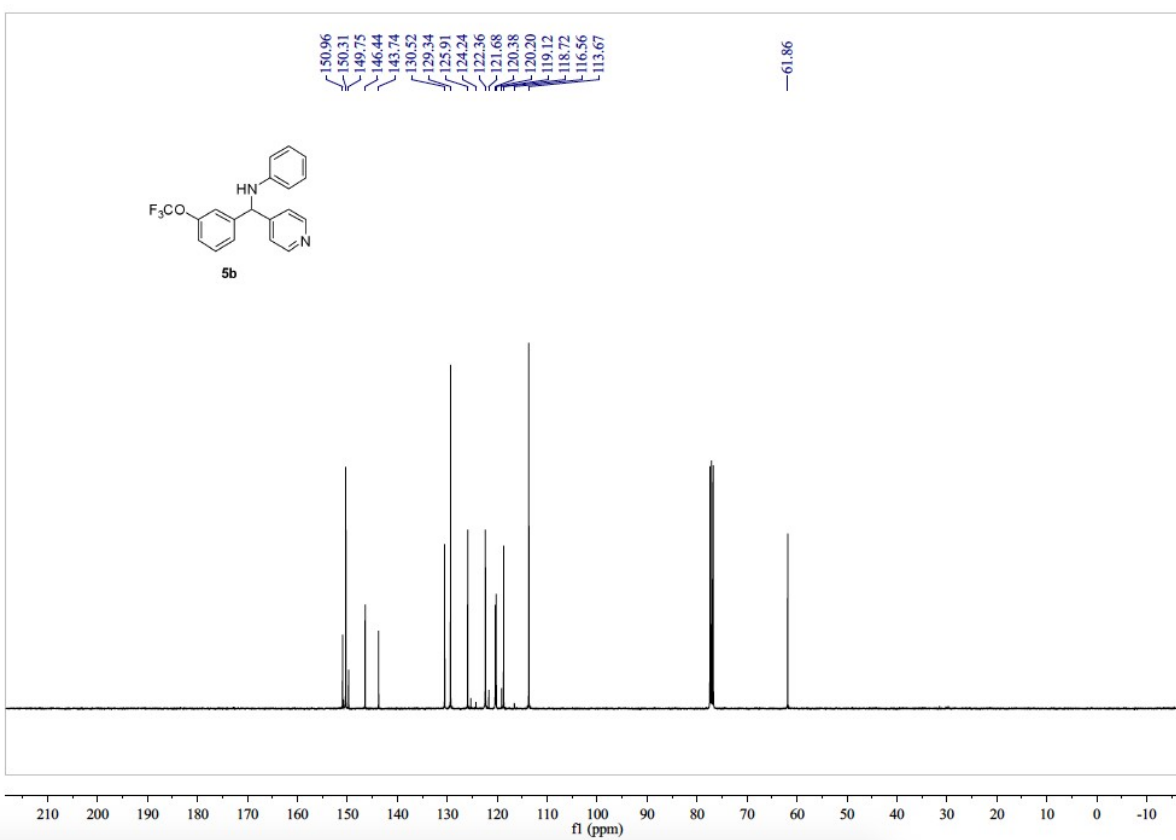

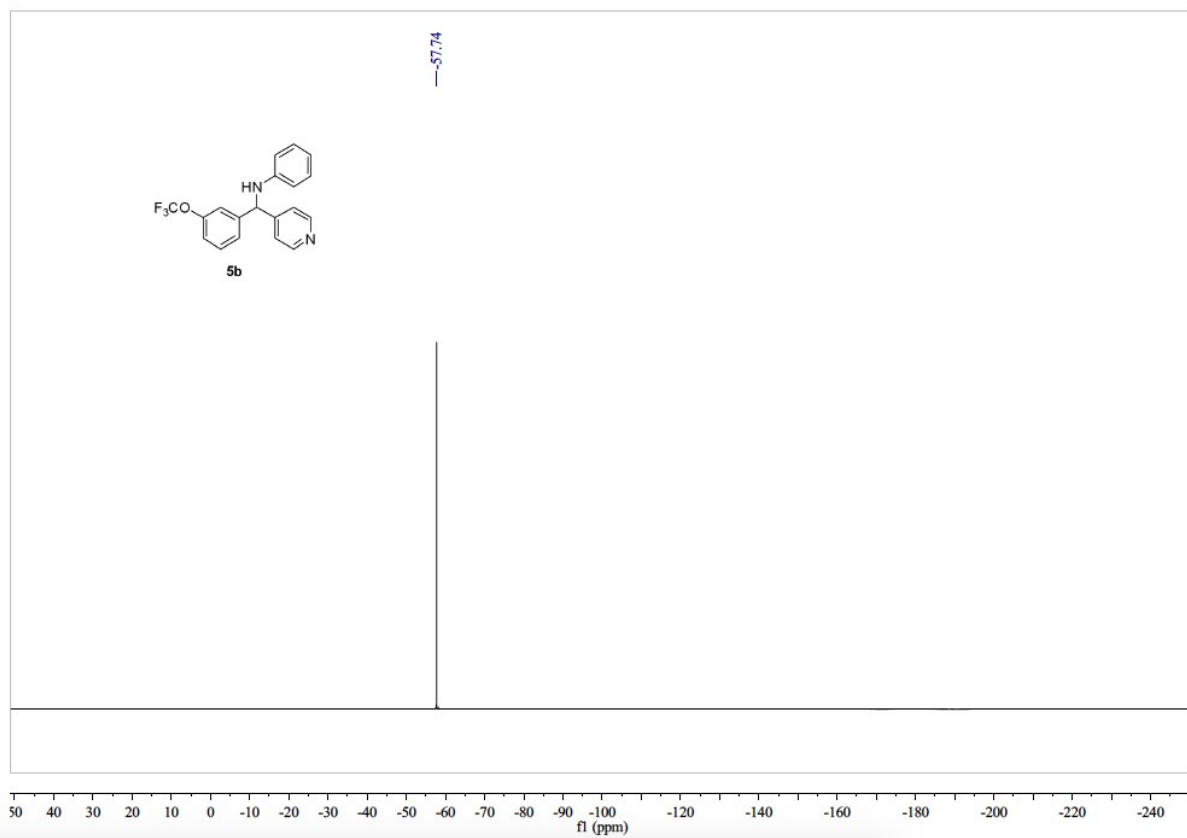

**5c: N-((4-fluorophenyl)(pyridin-4-yl)methyl)aniline**

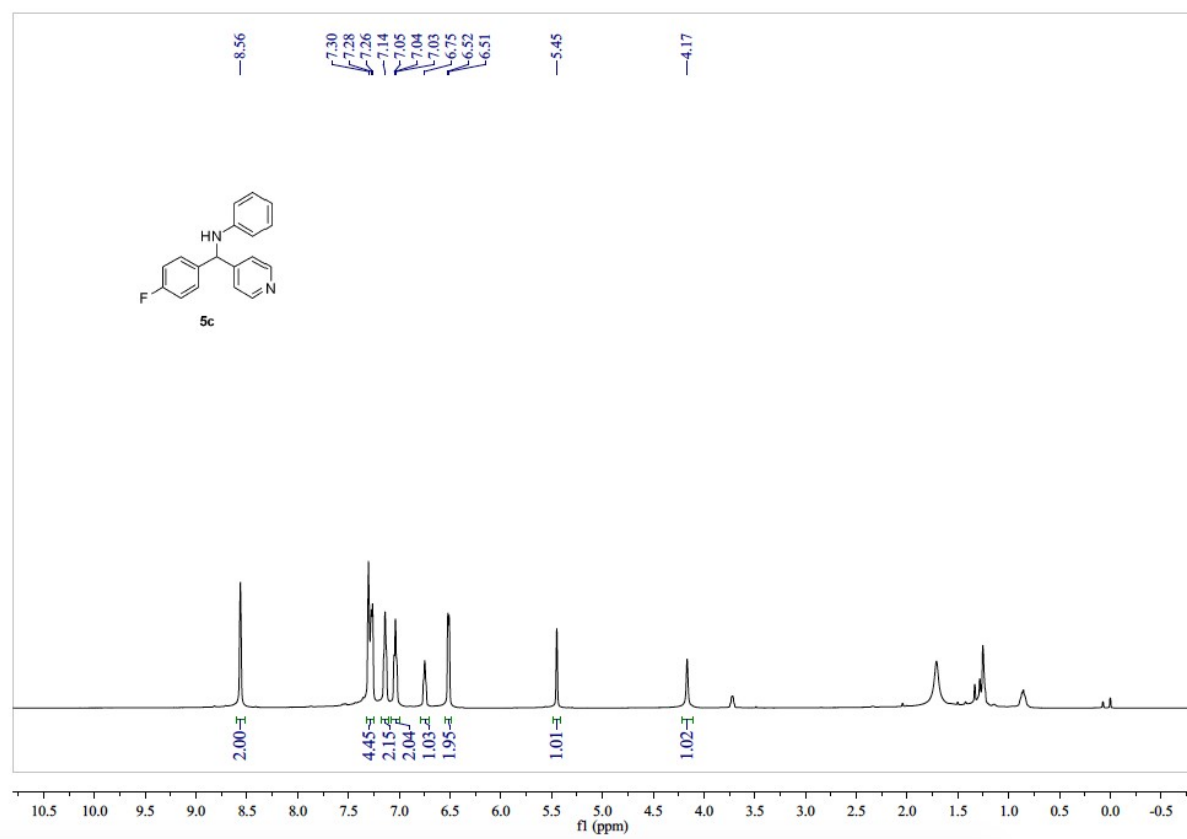

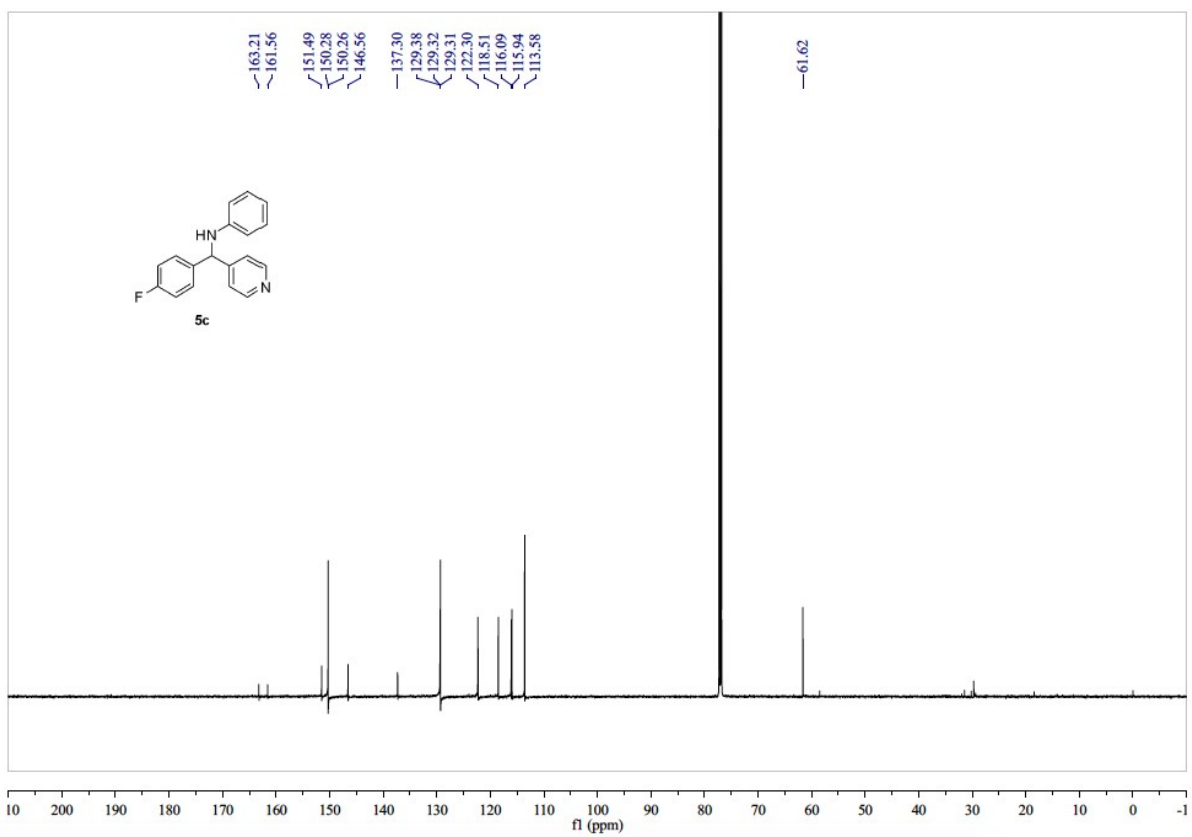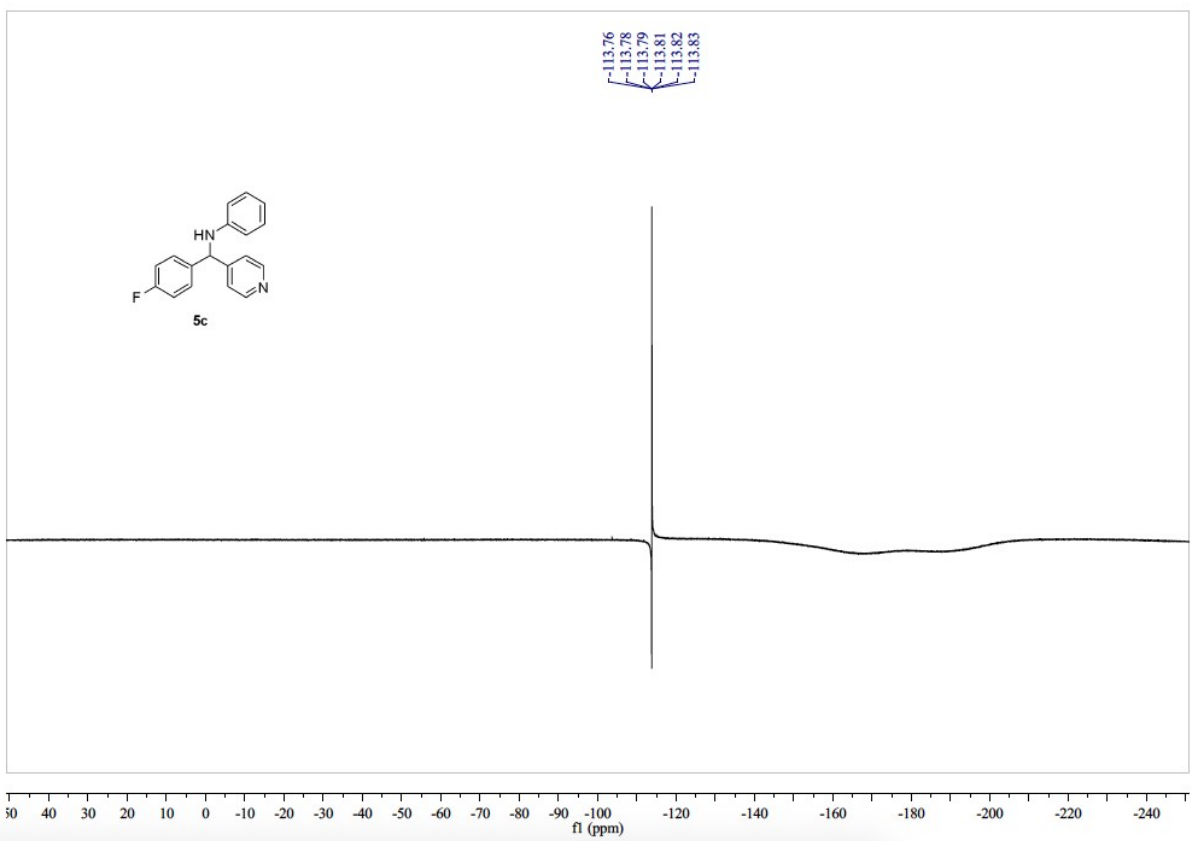

**5d: N-((4-chlorophenyl)(pyridin-4-yl)methyl)aniline**

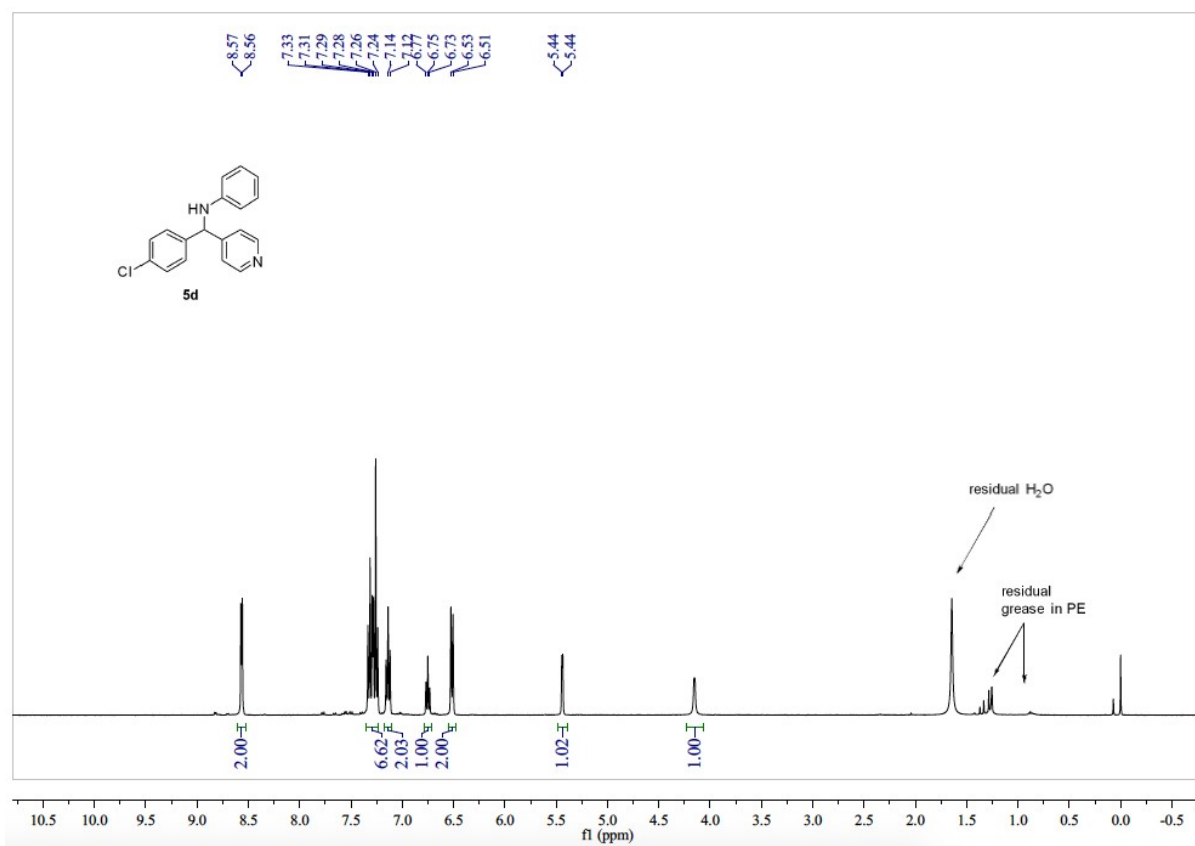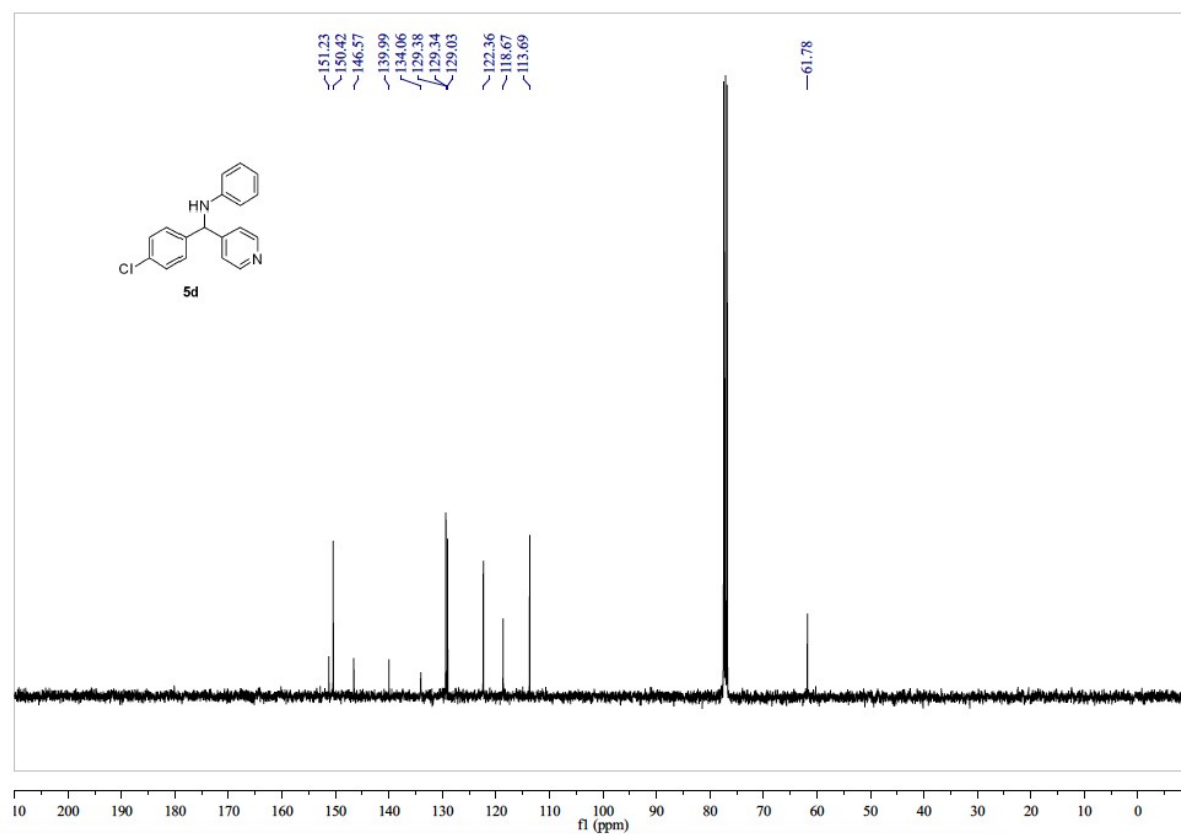

**5e: N-((4-bromophenyl)(pyridin-4-yl)methyl)aniline**

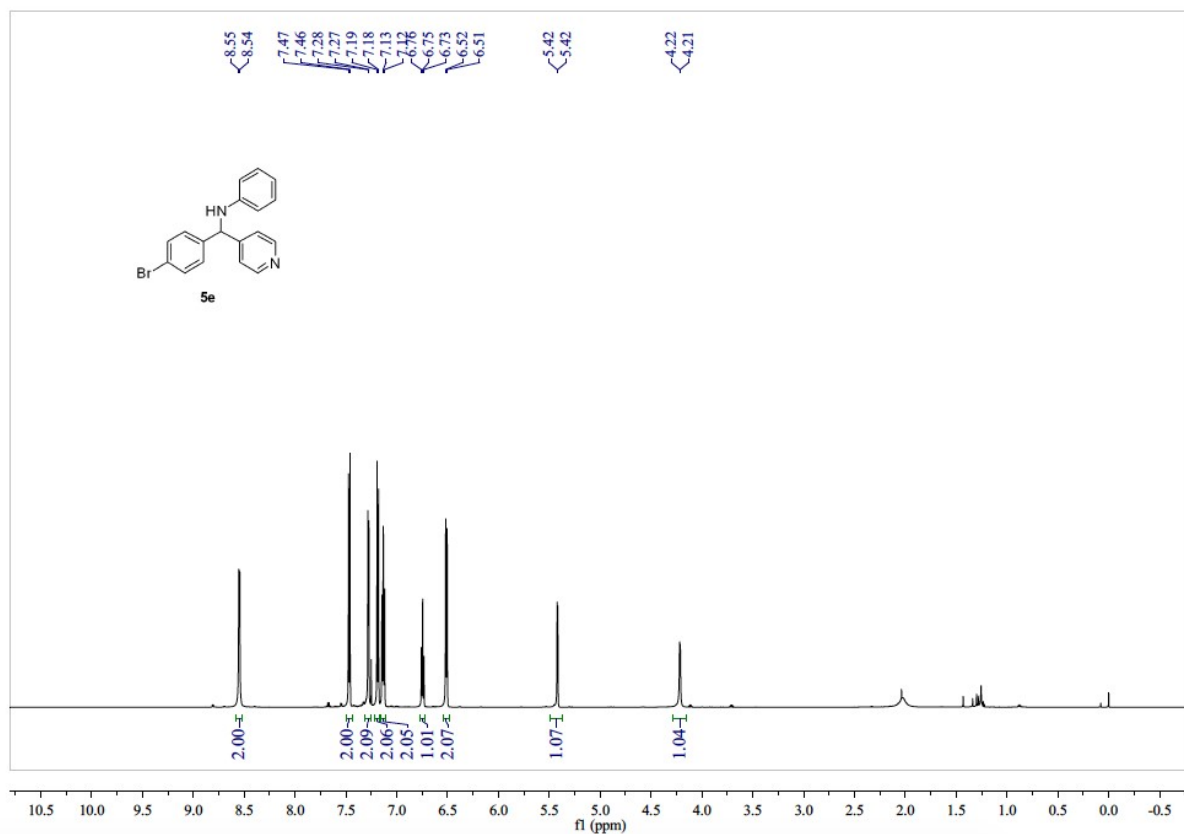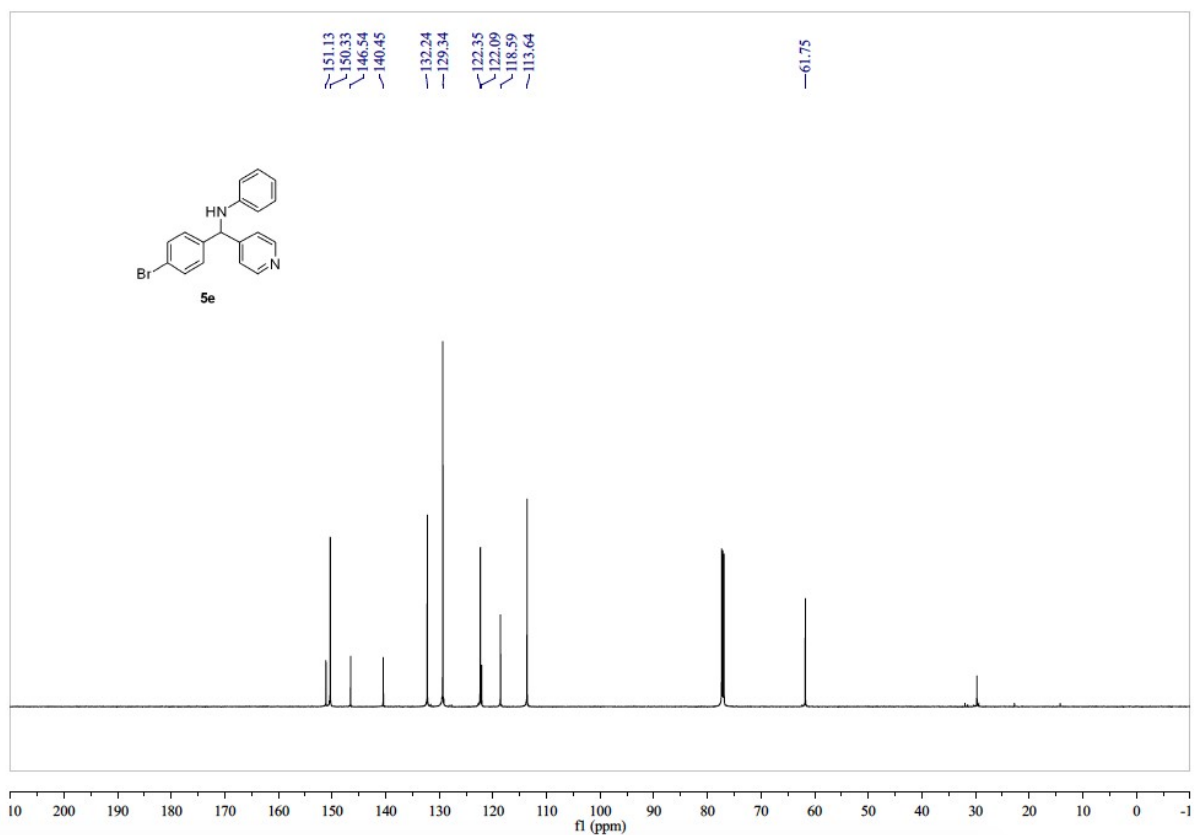



**5f: methyl 4-((phenylamino)(pyridin-4-yl)methyl)benzoate**

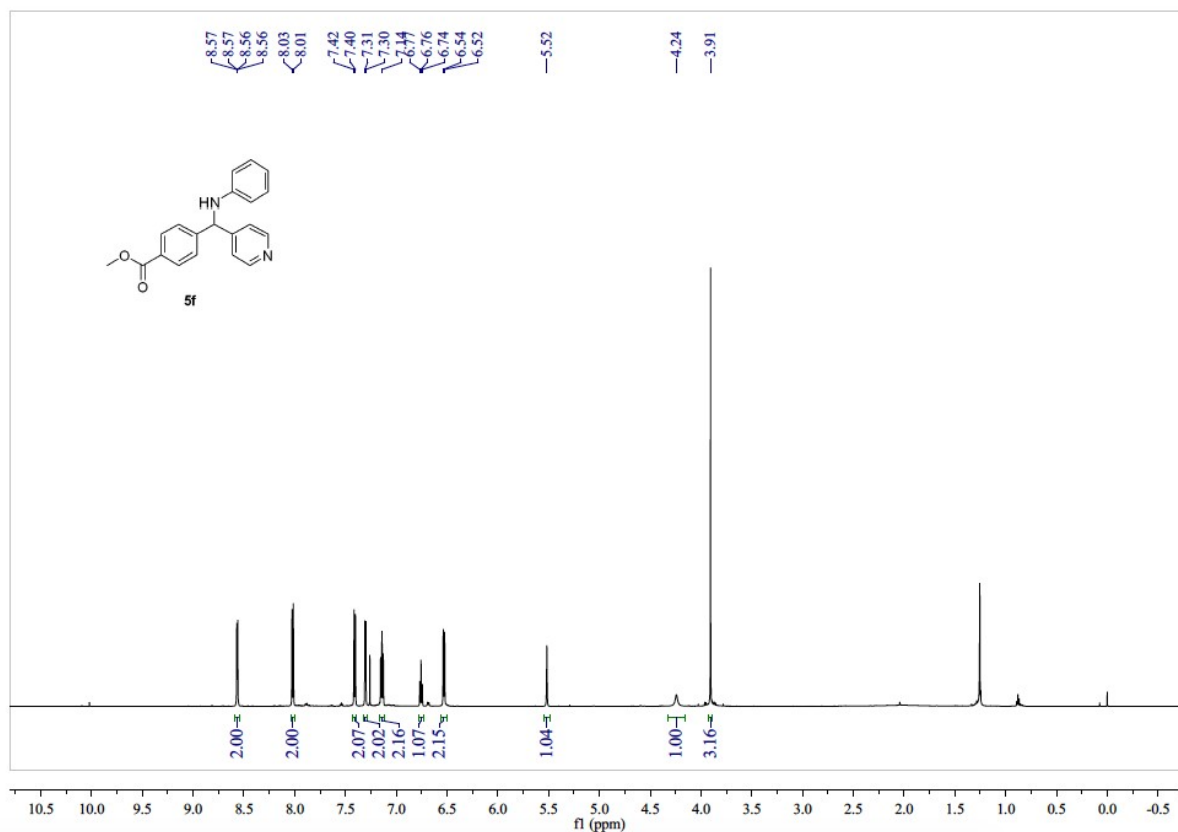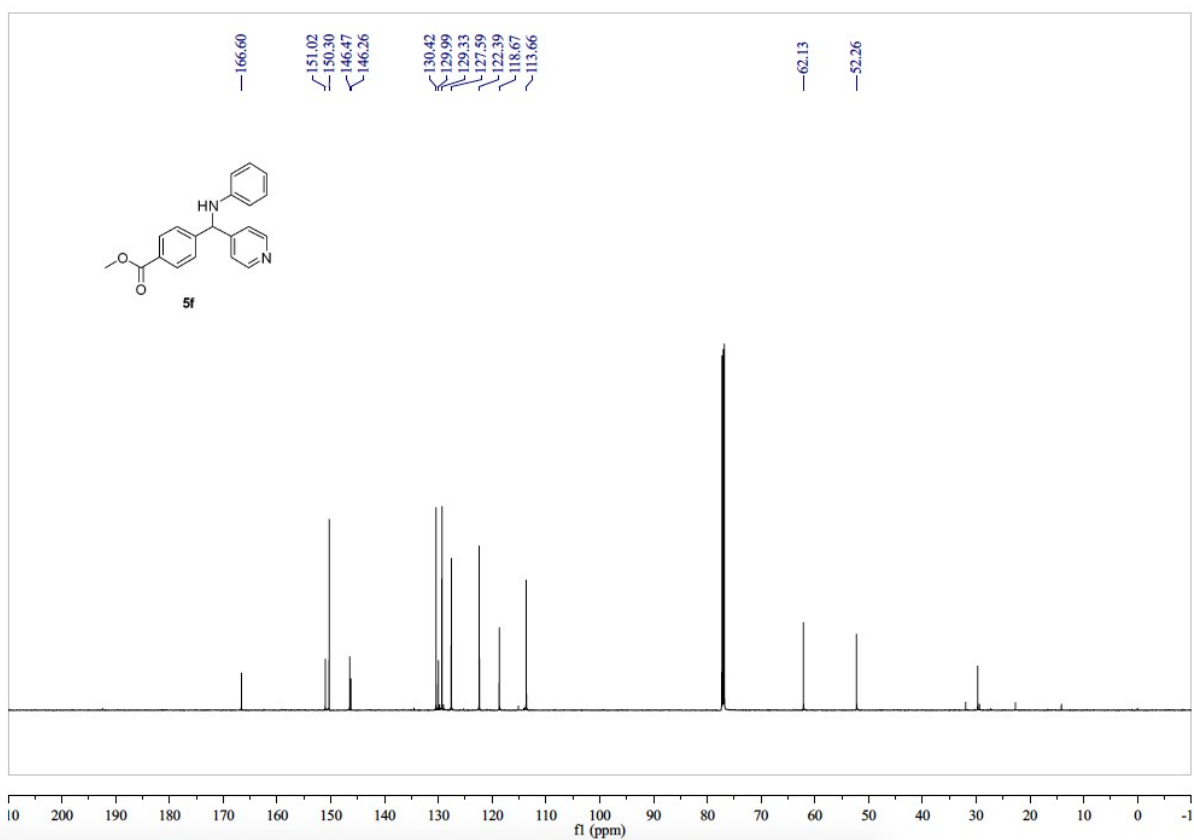

**5g: *N,N*-dimethyl-4-((phenylamino)(pyridin-4-yl)methyl)aniline**

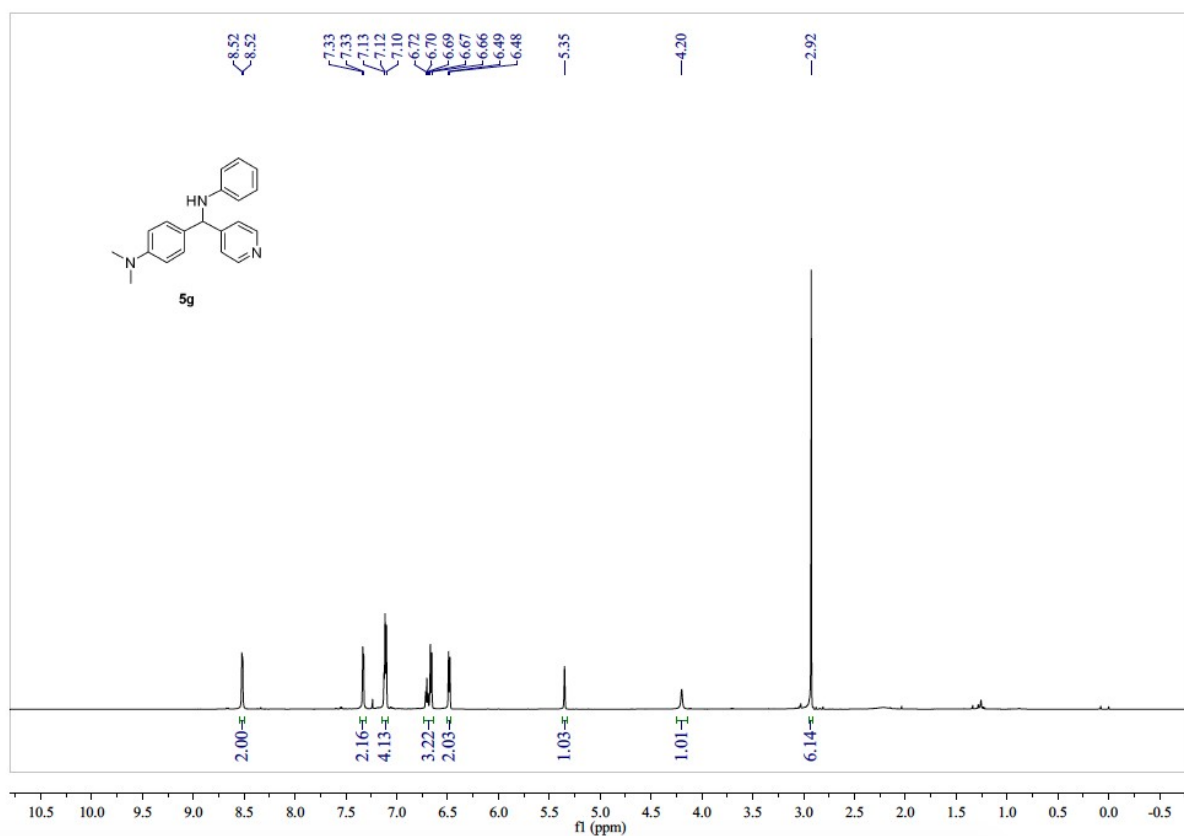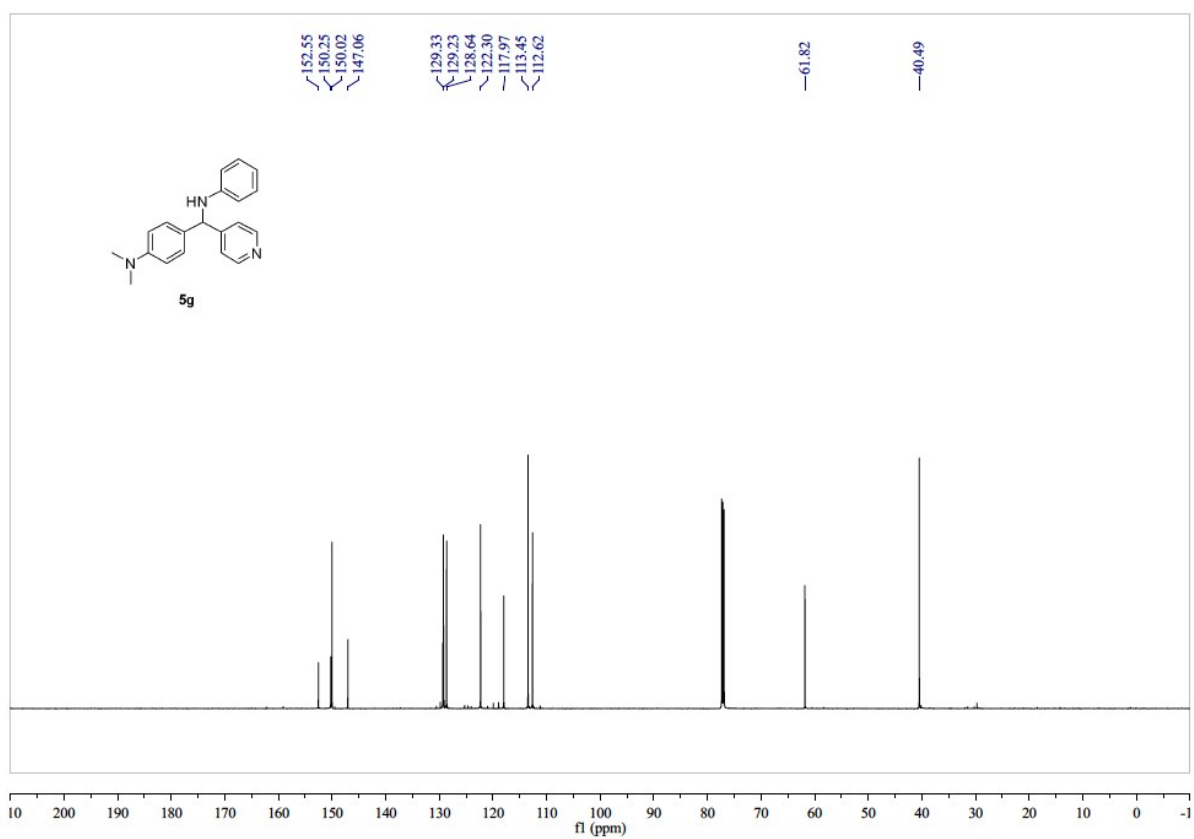

**5h: N-((3,5-dimethoxyphenyl)(pyridin-4-yl)methyl)aniline**

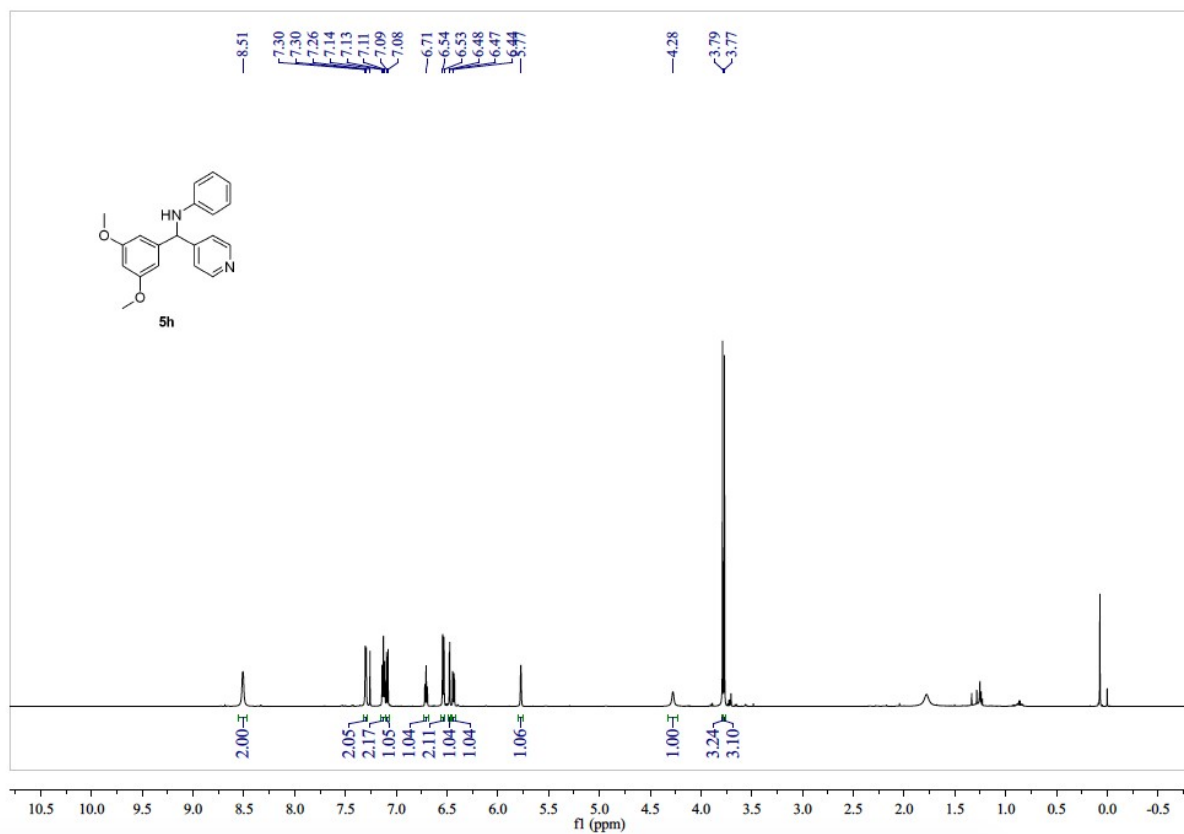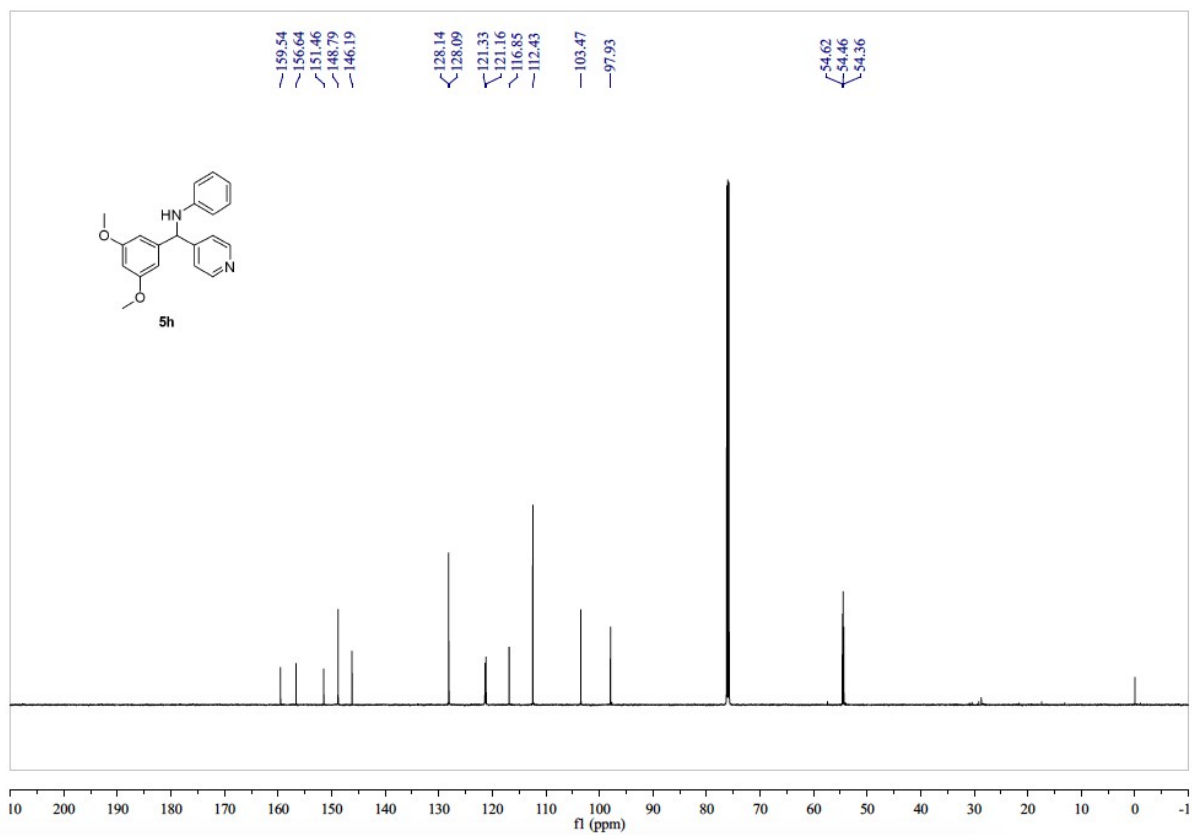

**5i: 2-methoxy-4-((phenylamino)(pyridin-4-yl)methyl)phenol**

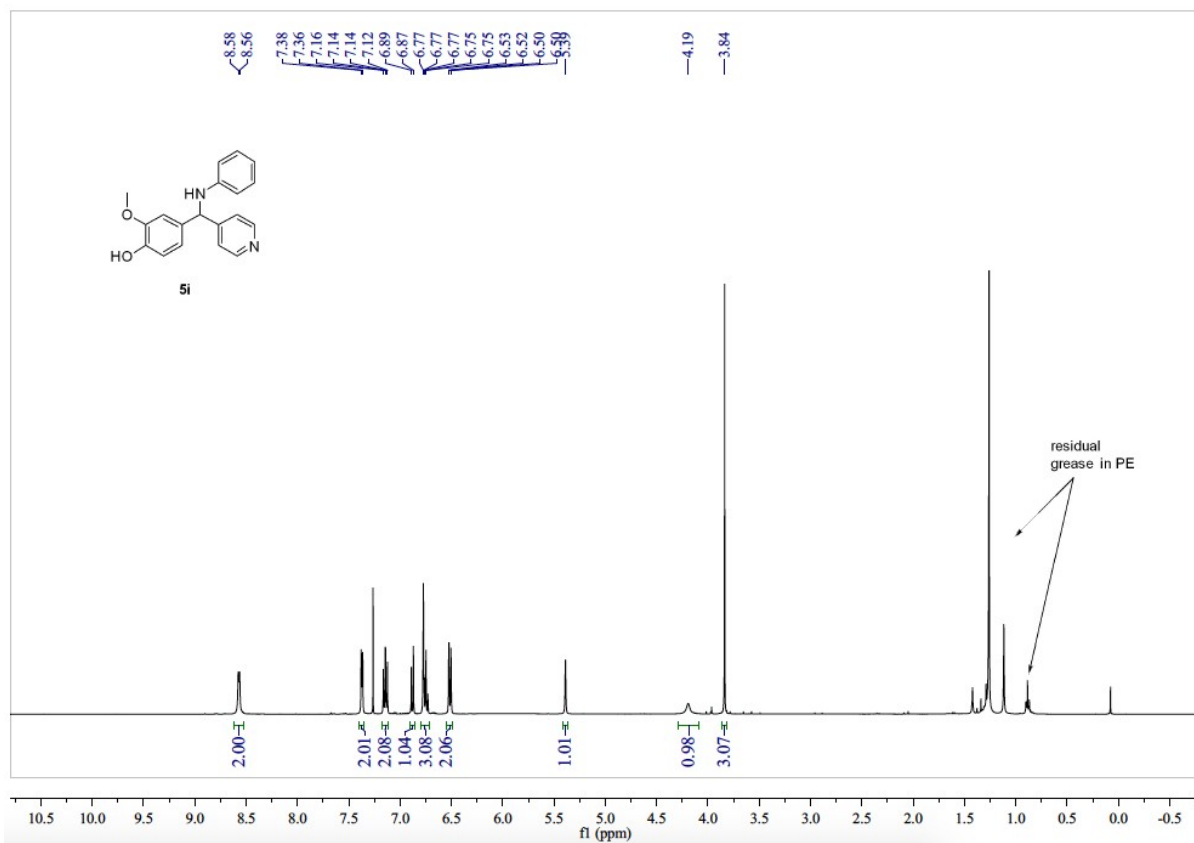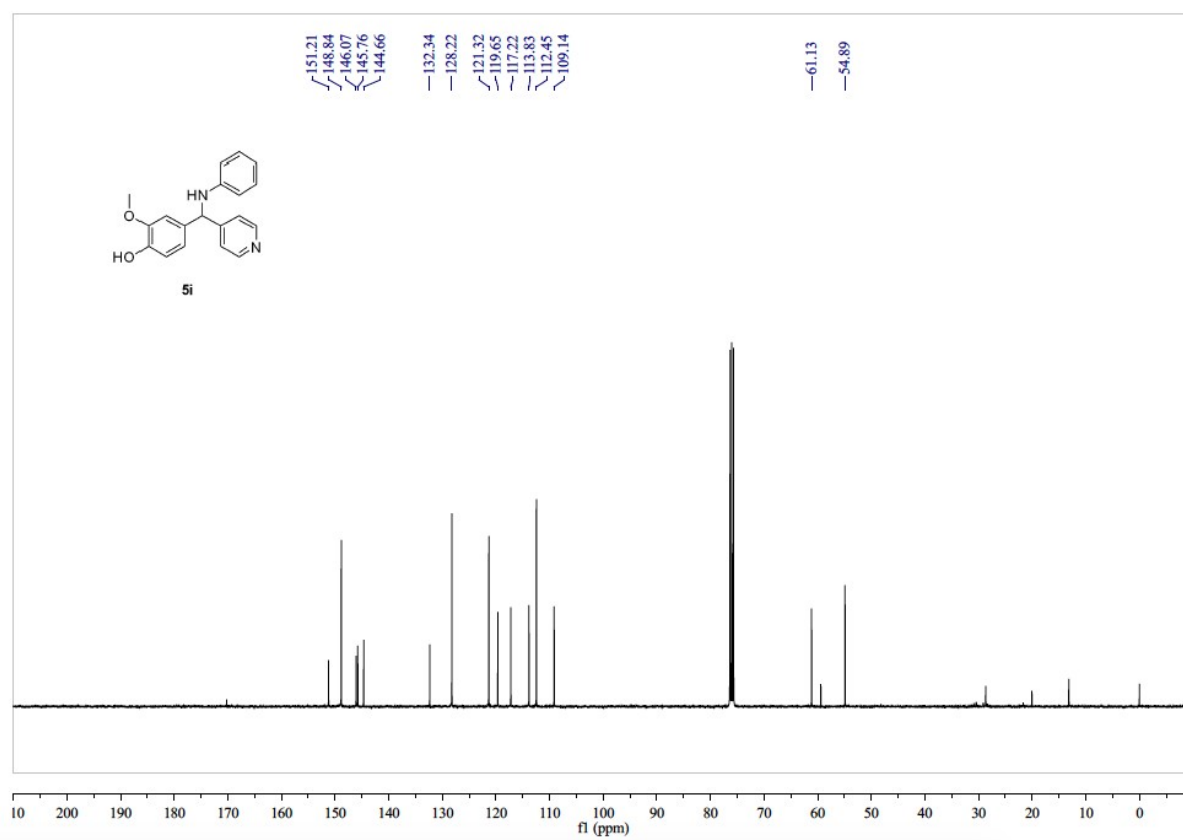

### 5j: *N*-(mesityl(pyridin-4-yl)methyl)aniline

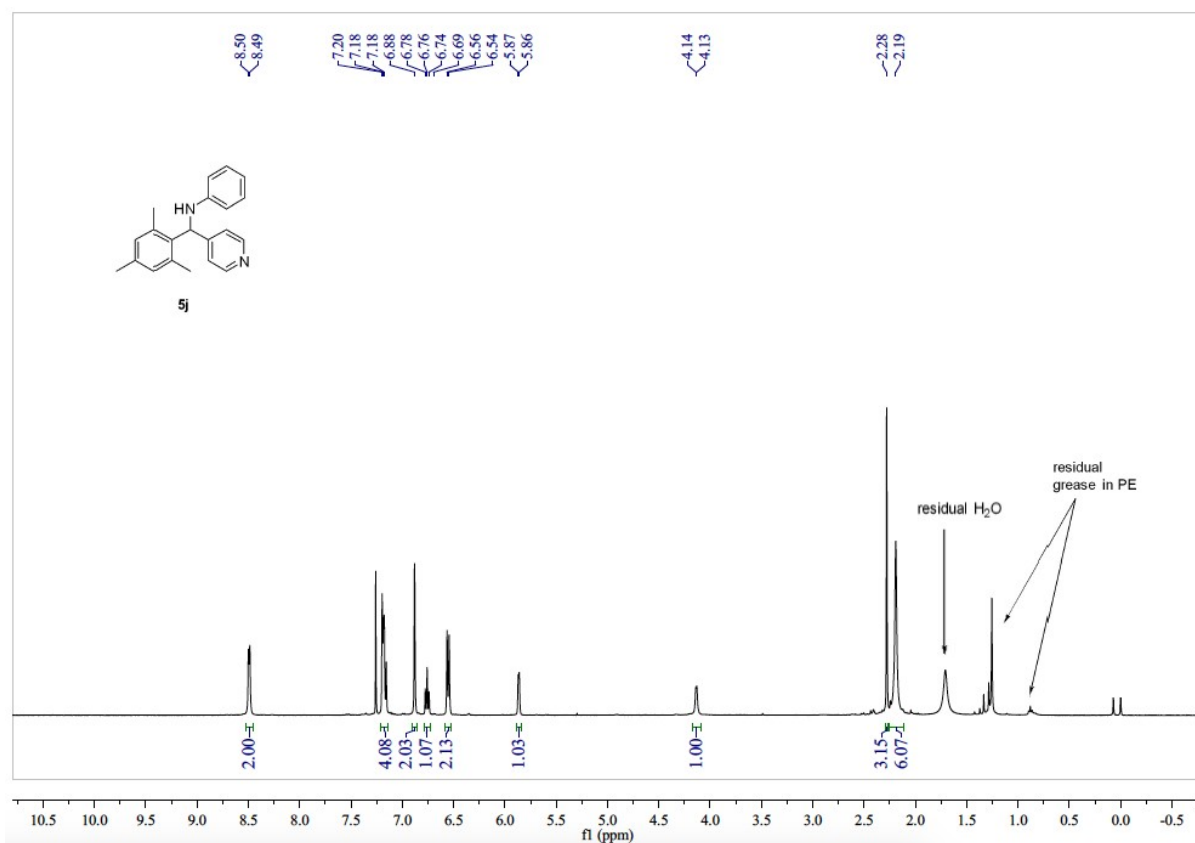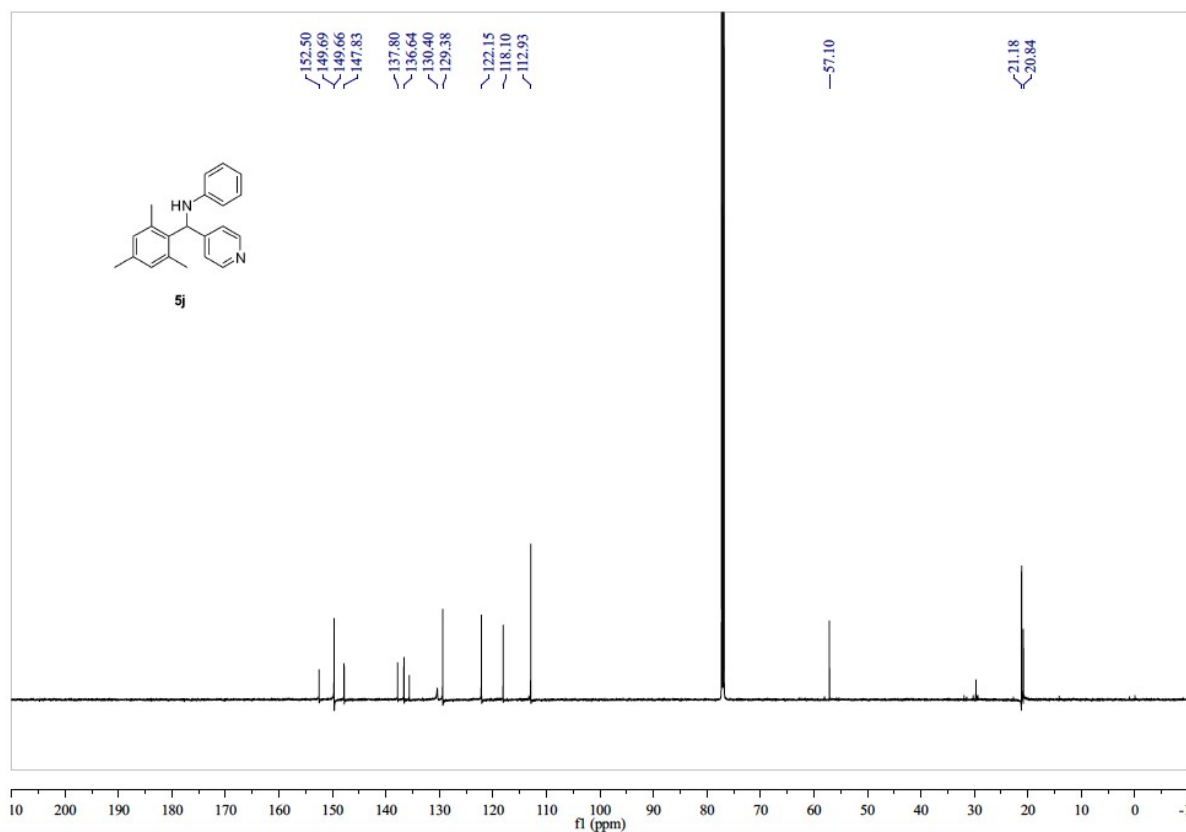

### 5k: *N*-(naphthalen-2-yl(pyridin-4-yl)methyl)aniline

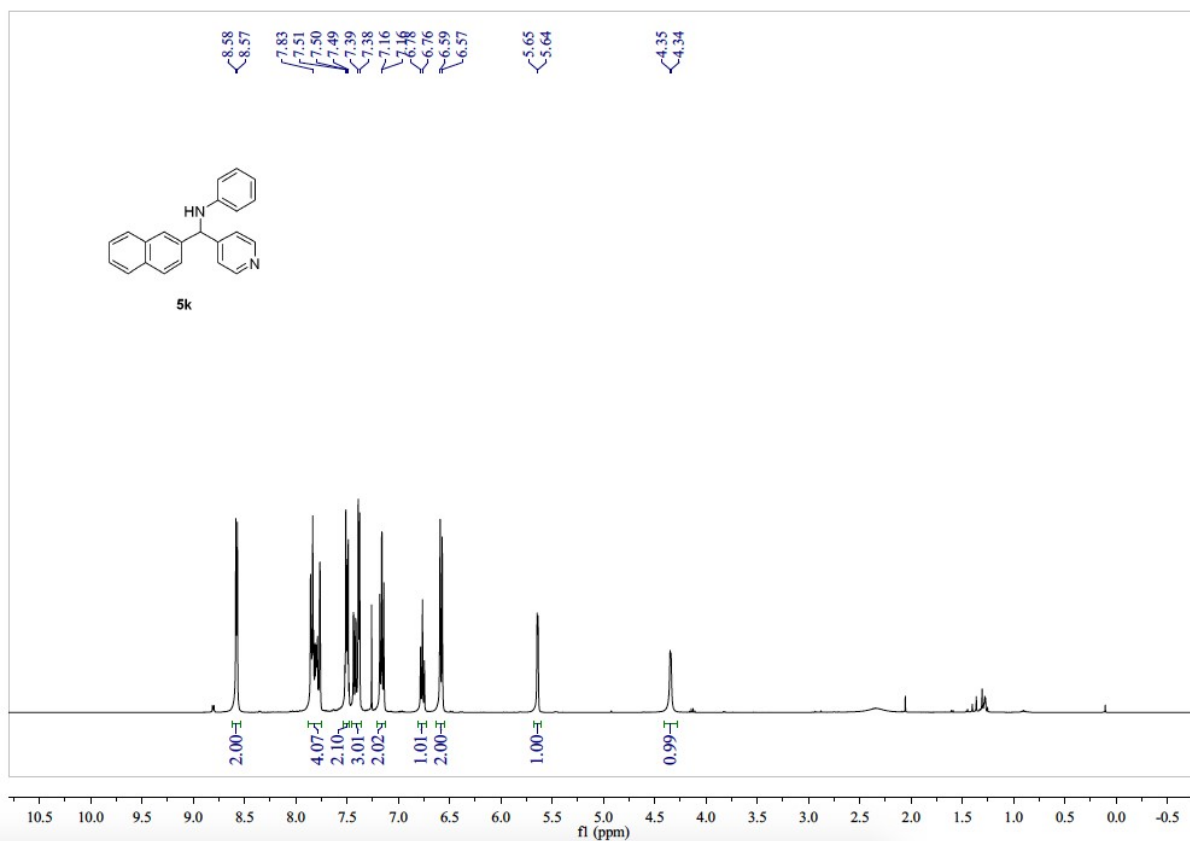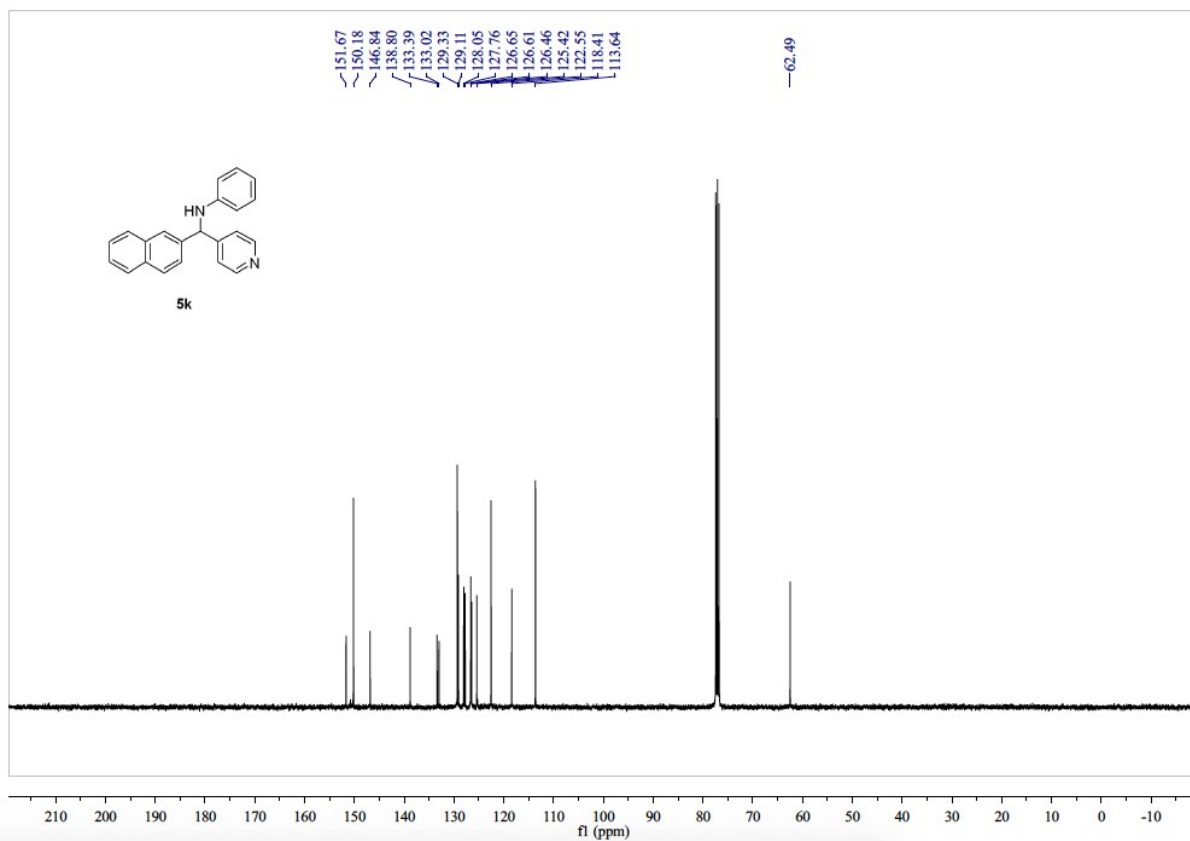

**5l: *N*-benzyl-*N*-methyl-1-(pyridin-4-yl)-1-(1*H*-pyrrol-2-yl)methanamine]**

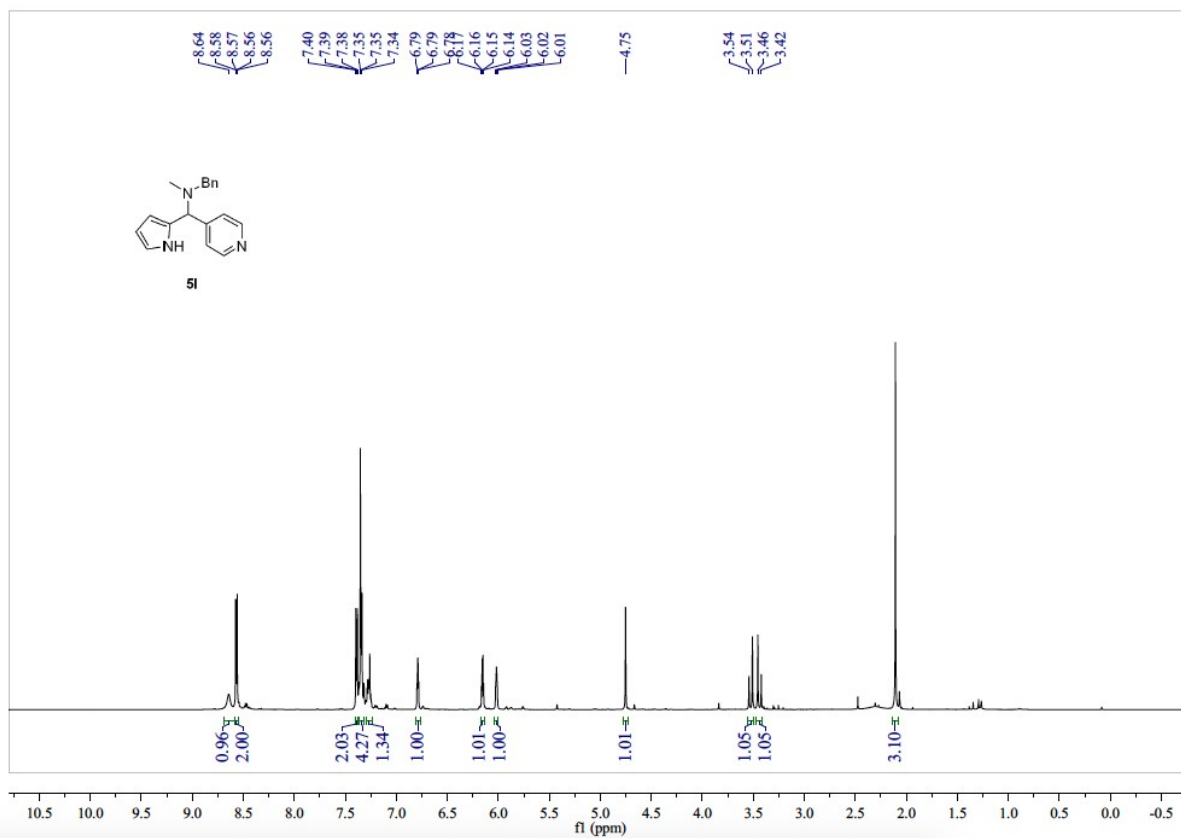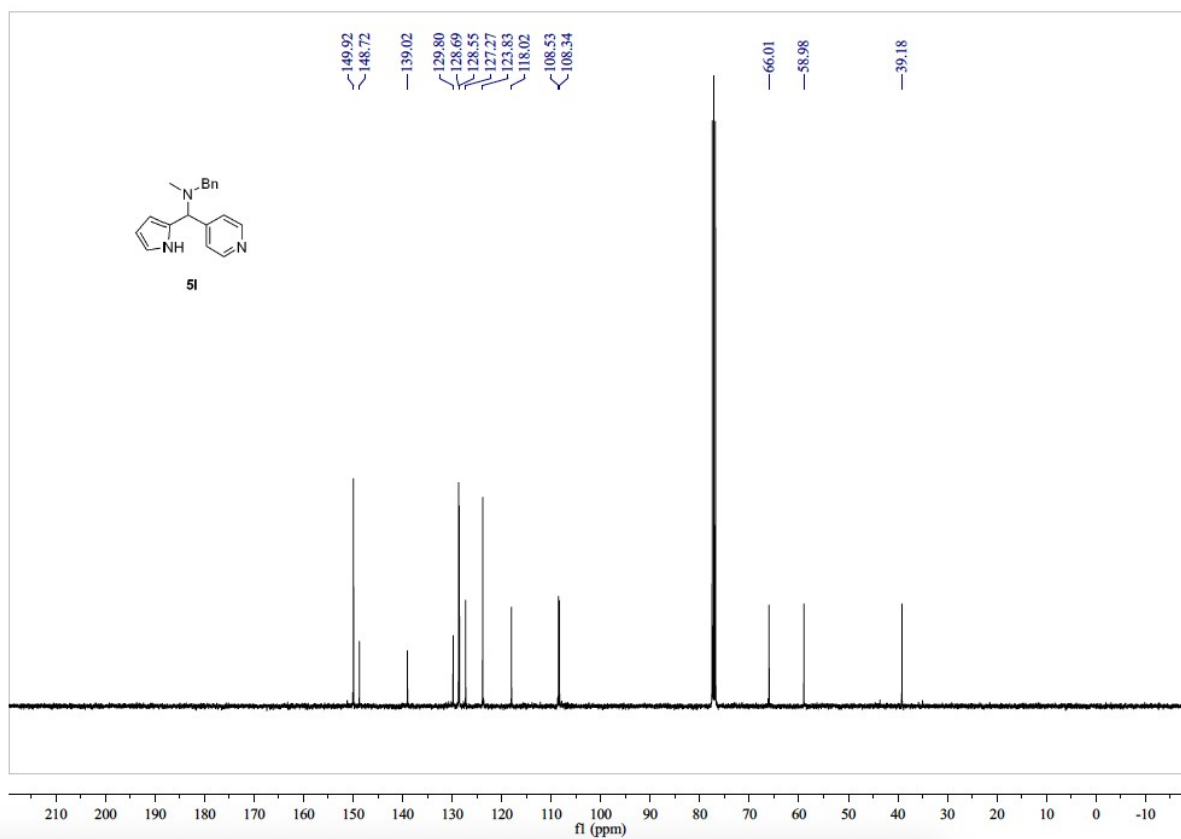

**5m: N-benzyl-N-methyl-1-(5-methylfuran-2-yl)-1-(pyridin-4-yl)methanamine**

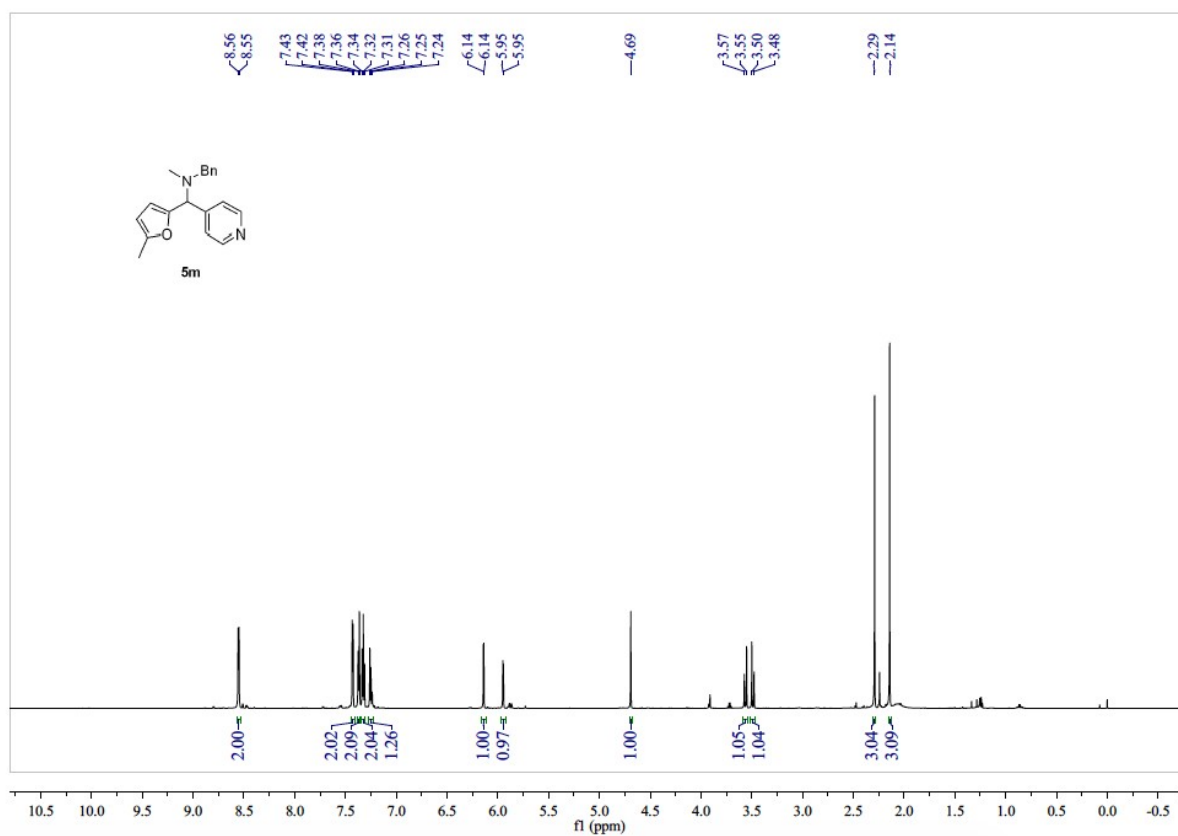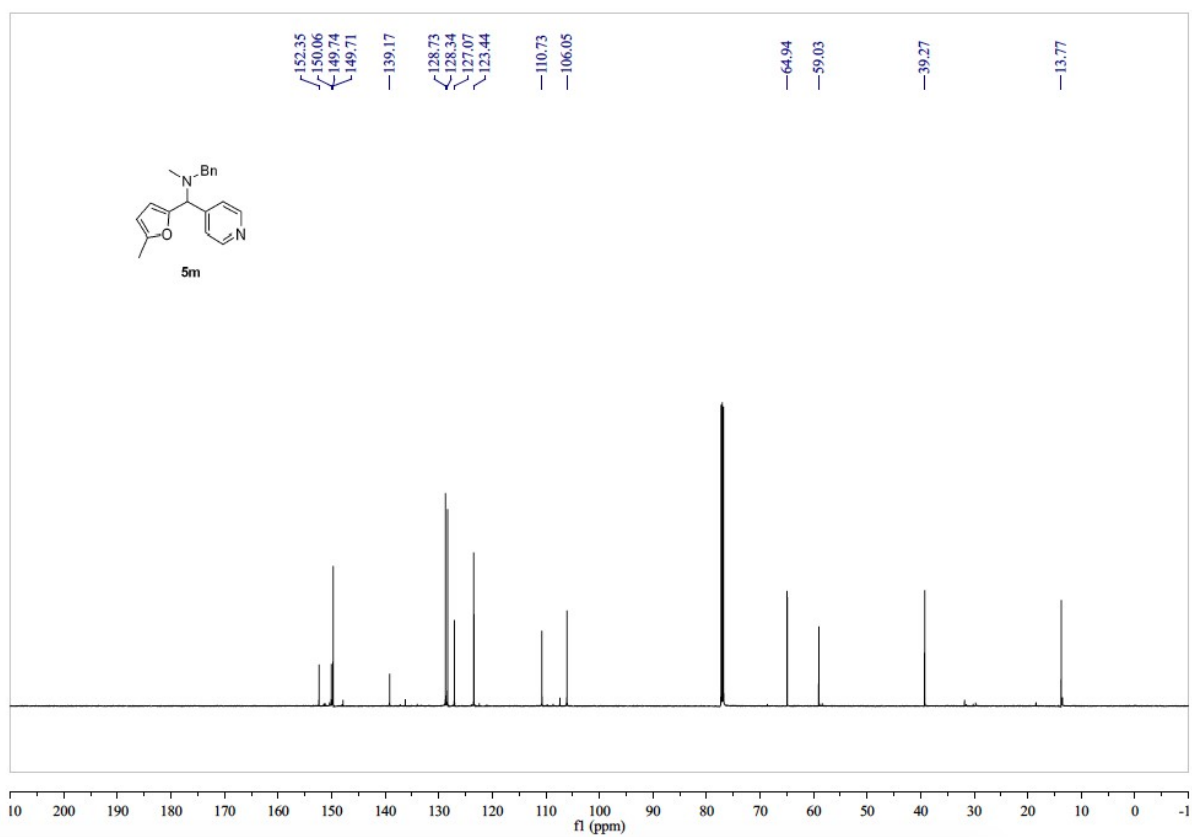



**5n: N-benzyl-N-methyl-1-(pyridin-4-yl)-1-(thiophen-3-yl)methanamine**

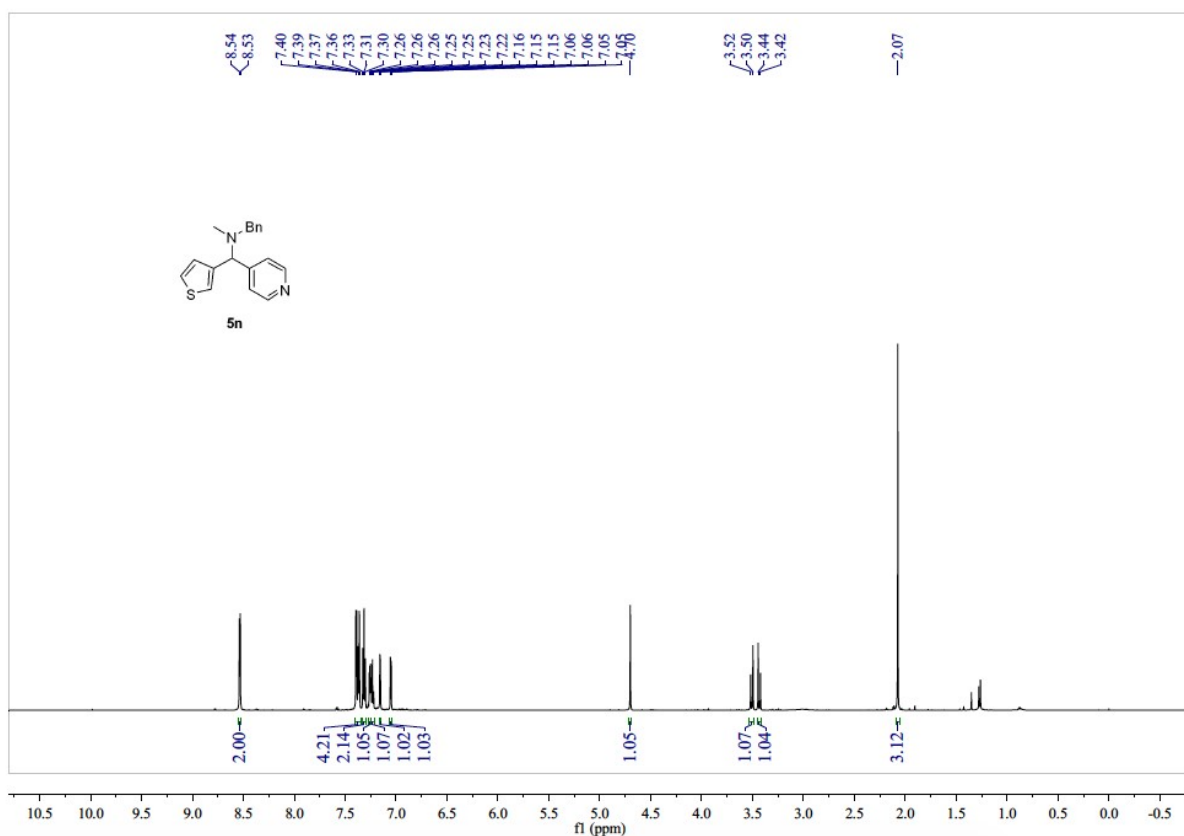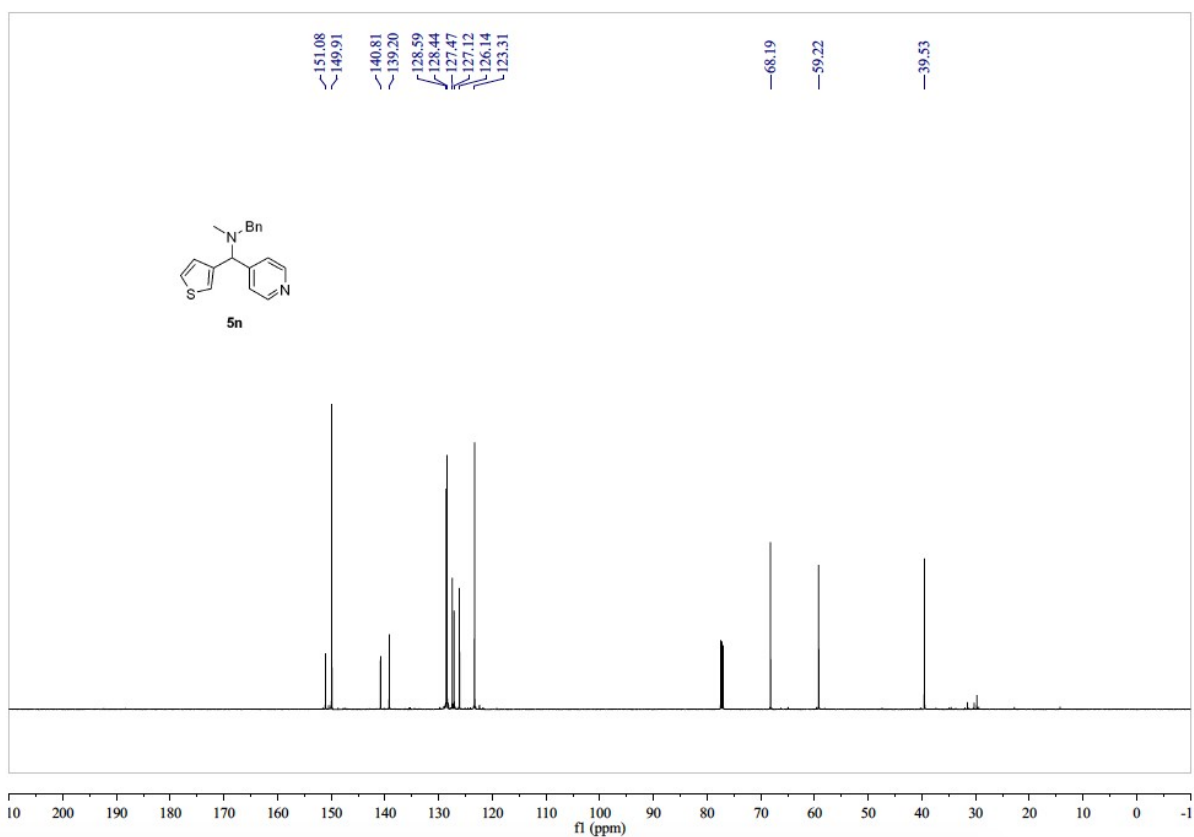

**5o: N-((1H-indol-3-yl)(pyridin-4-yl)methyl)aniline**

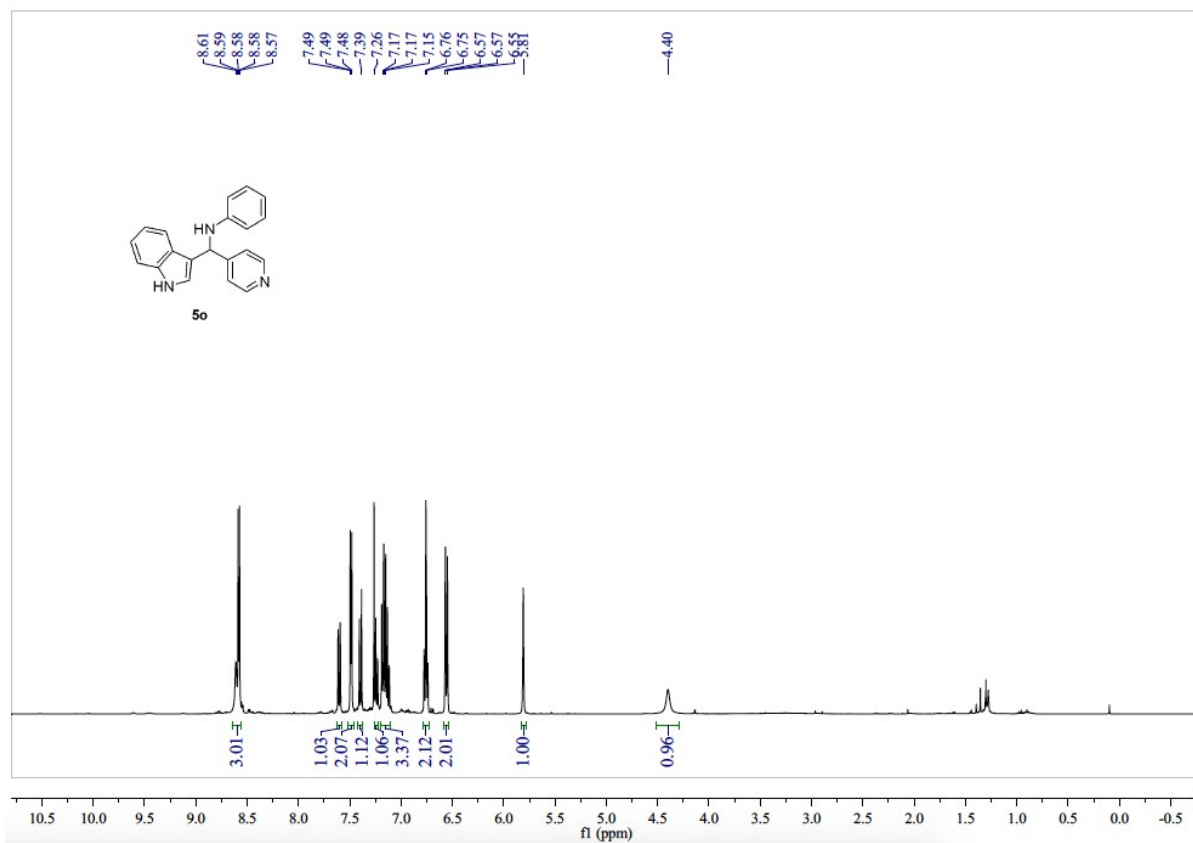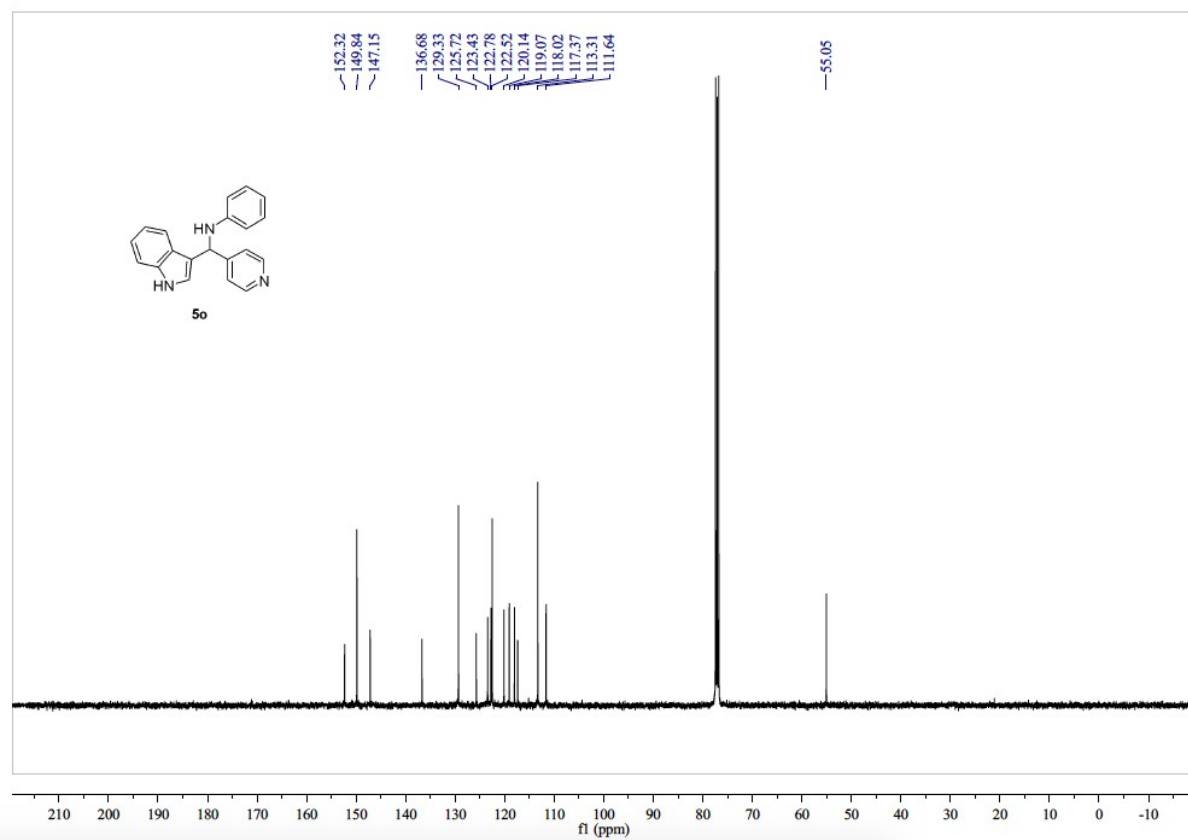

**5p: N-(2-methyl-1-(pyridin-4-yl)but-2-en-1-yl)aniline**

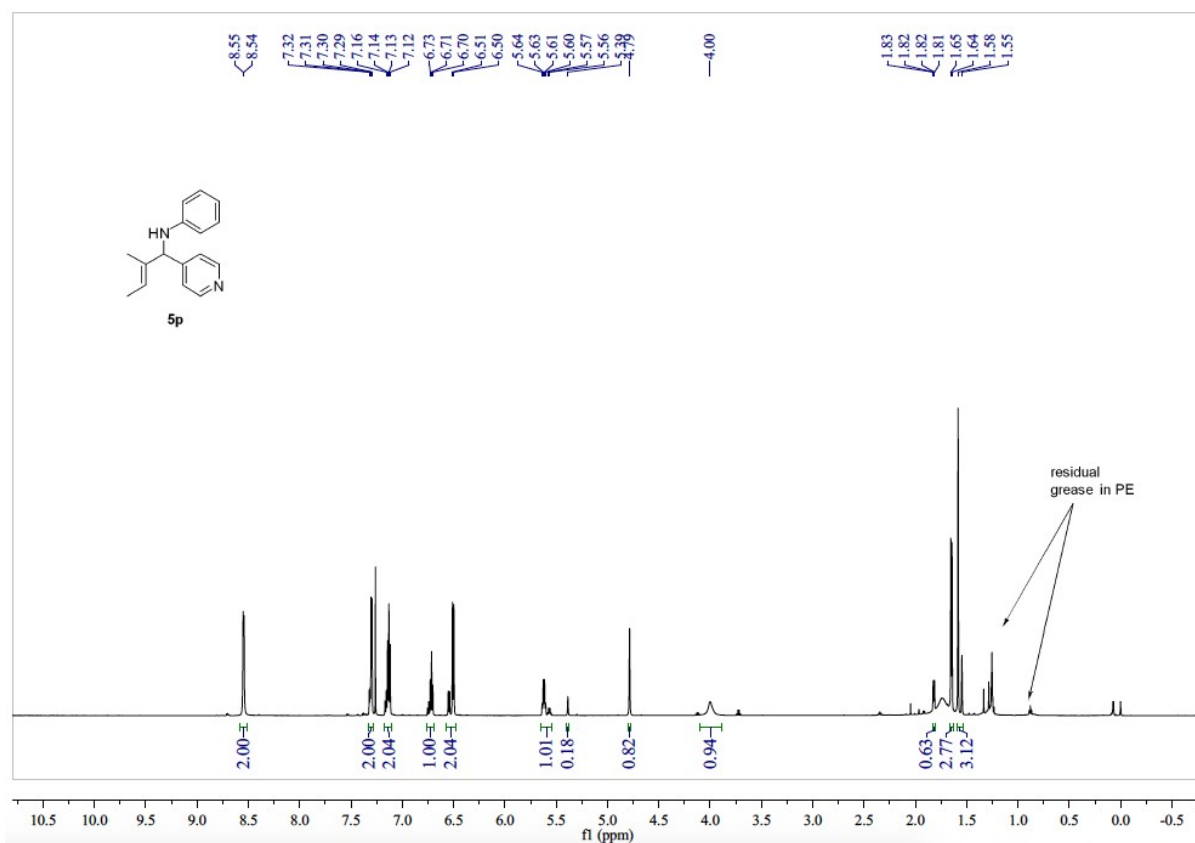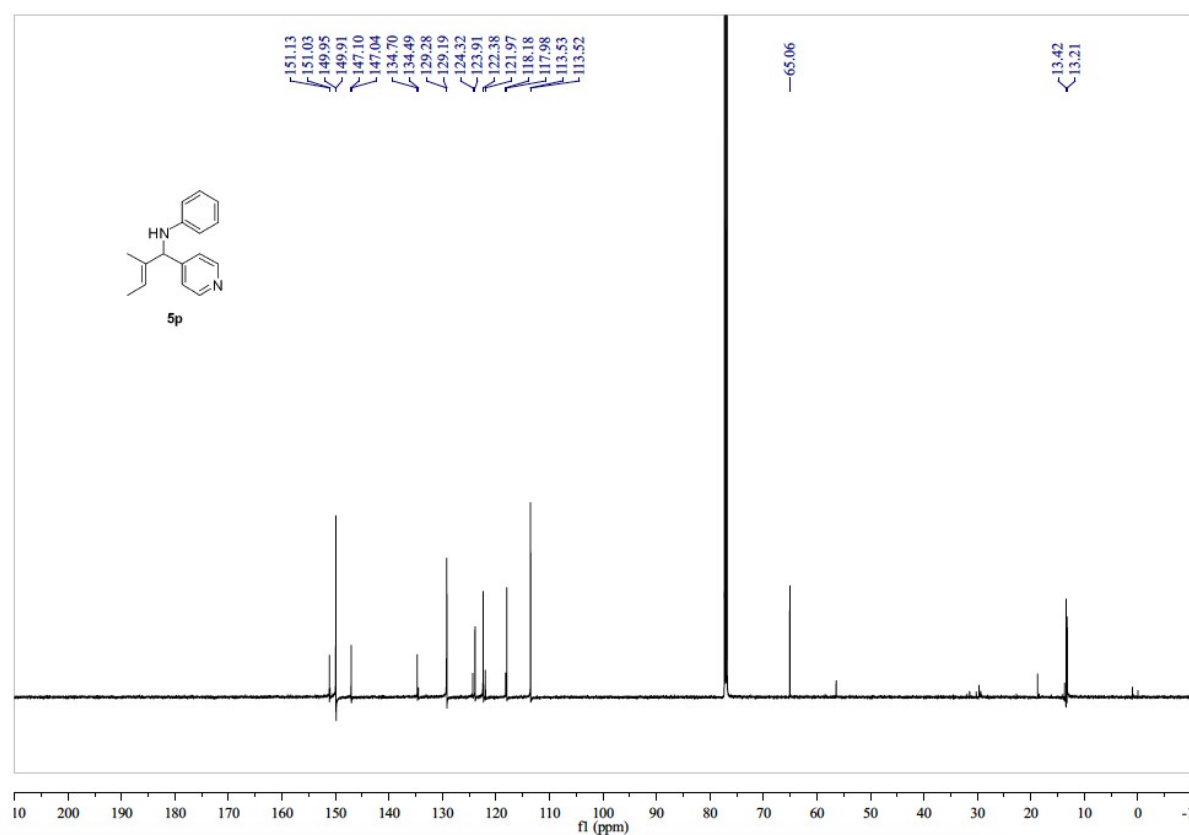

**5q: *N*-(2-ethyl-1-(pyridin-4-yl)but-2-en-1-yl)aniline**

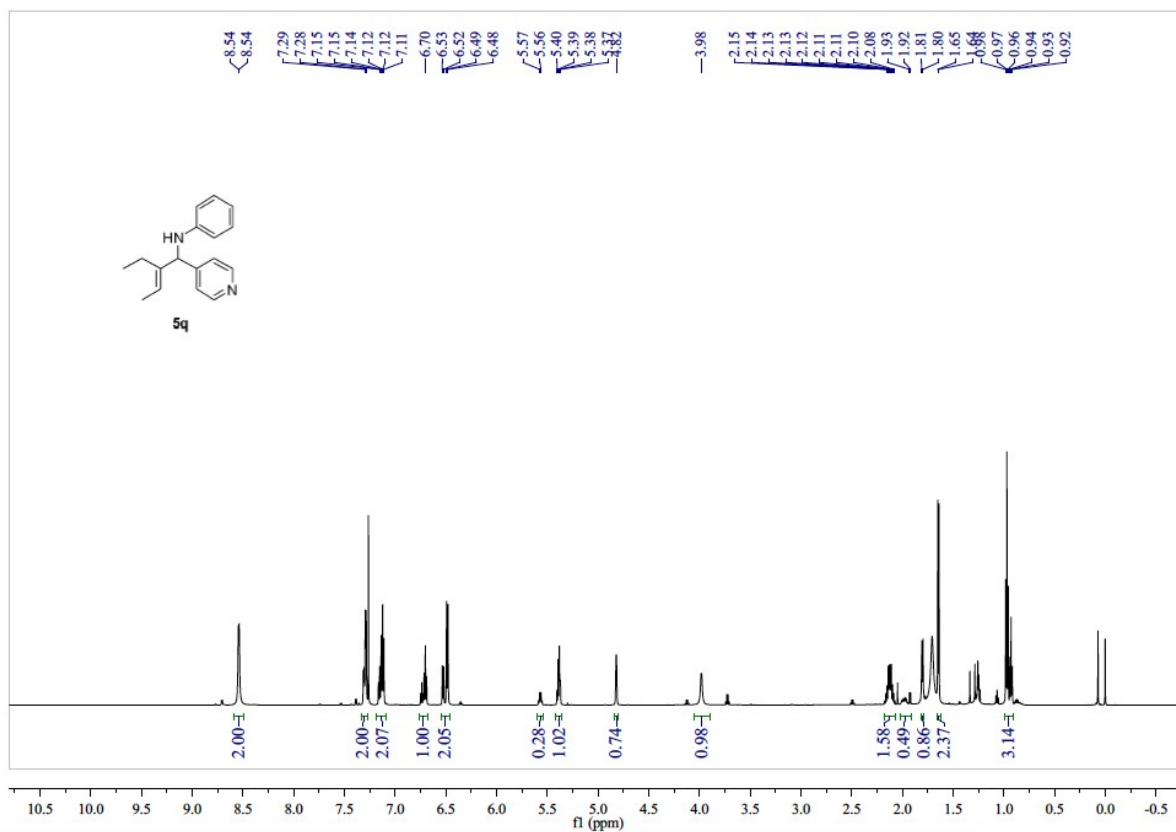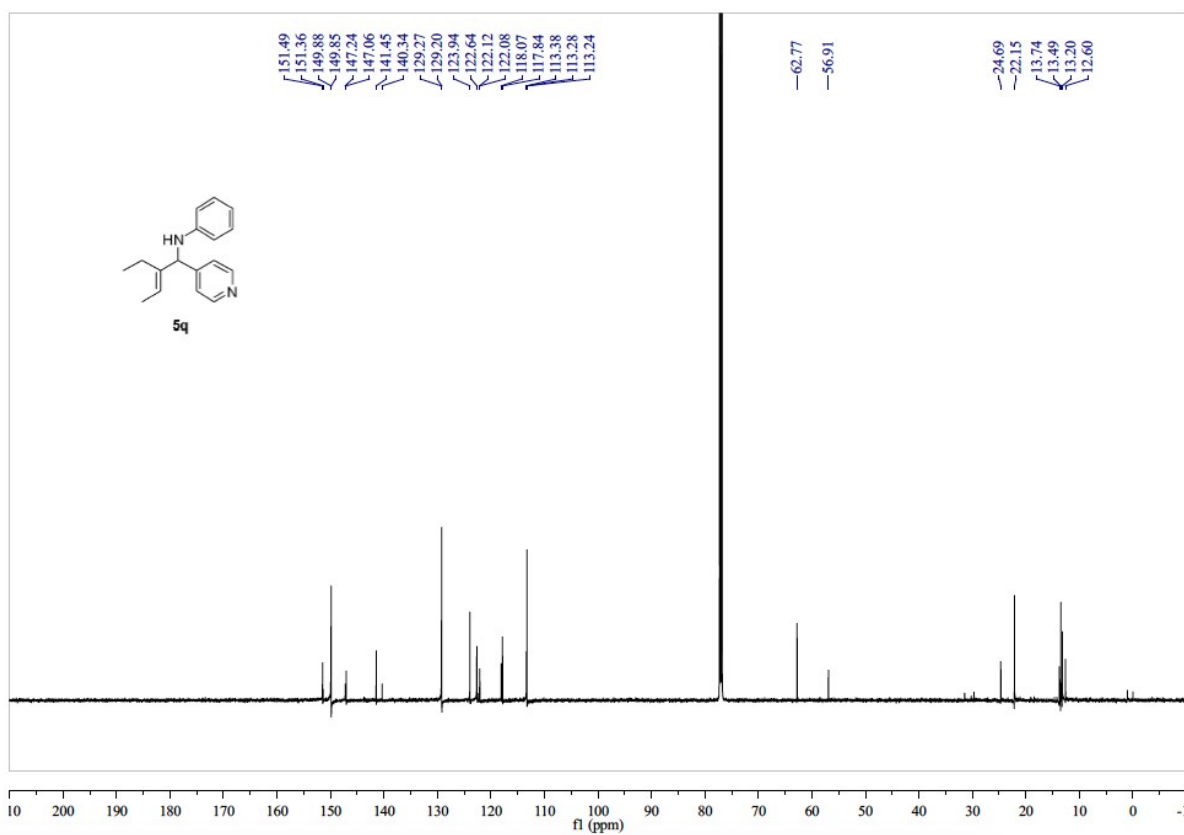

**5r: N-(3-methyl-1-(pyridin-4-yl)but-2-en-1-yl)aniline**

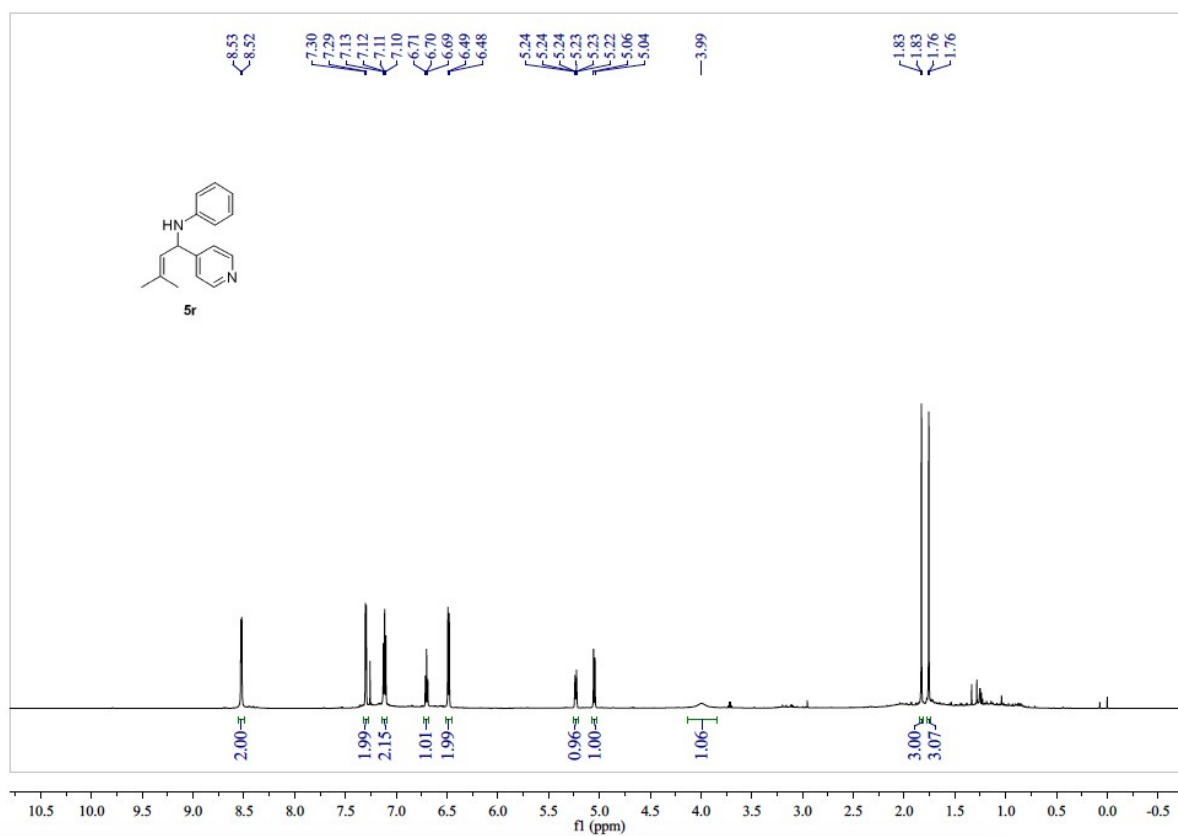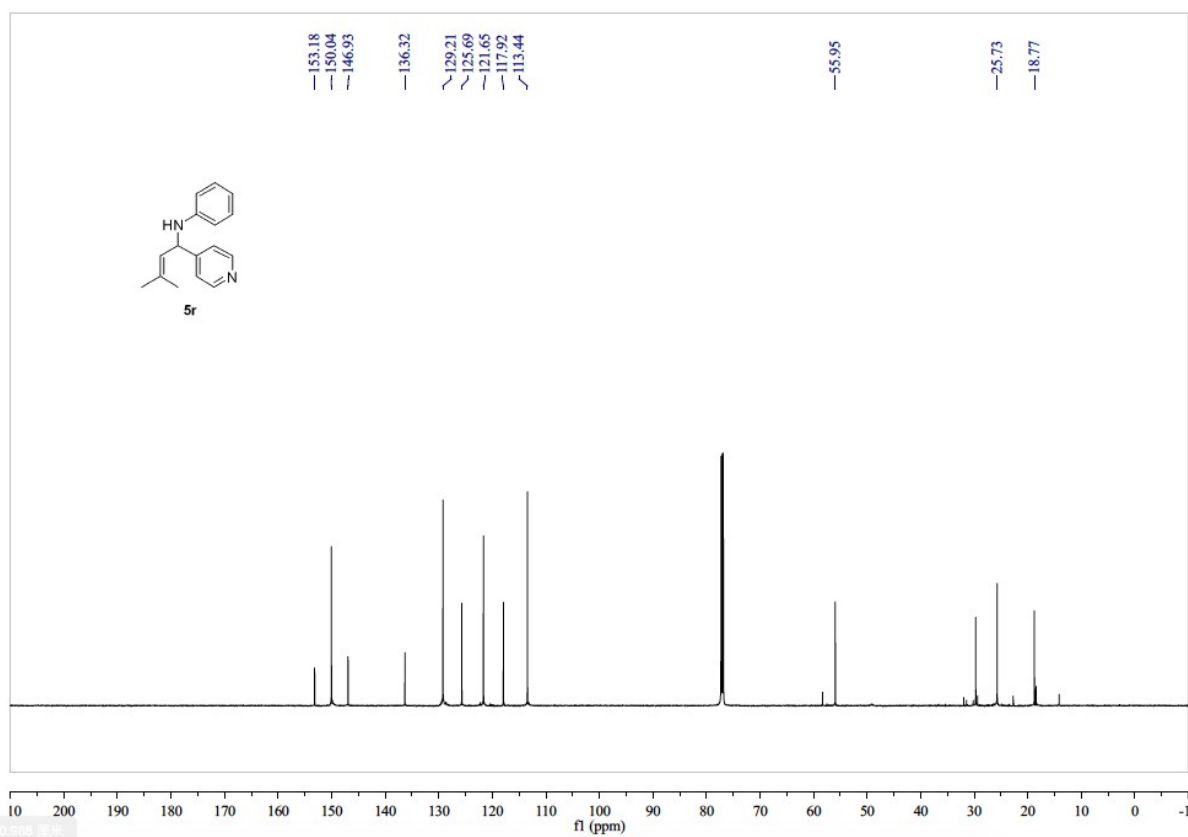

**5s: N-(2-methyl-1-(pyridin-4-yl)pentyl)aniline**

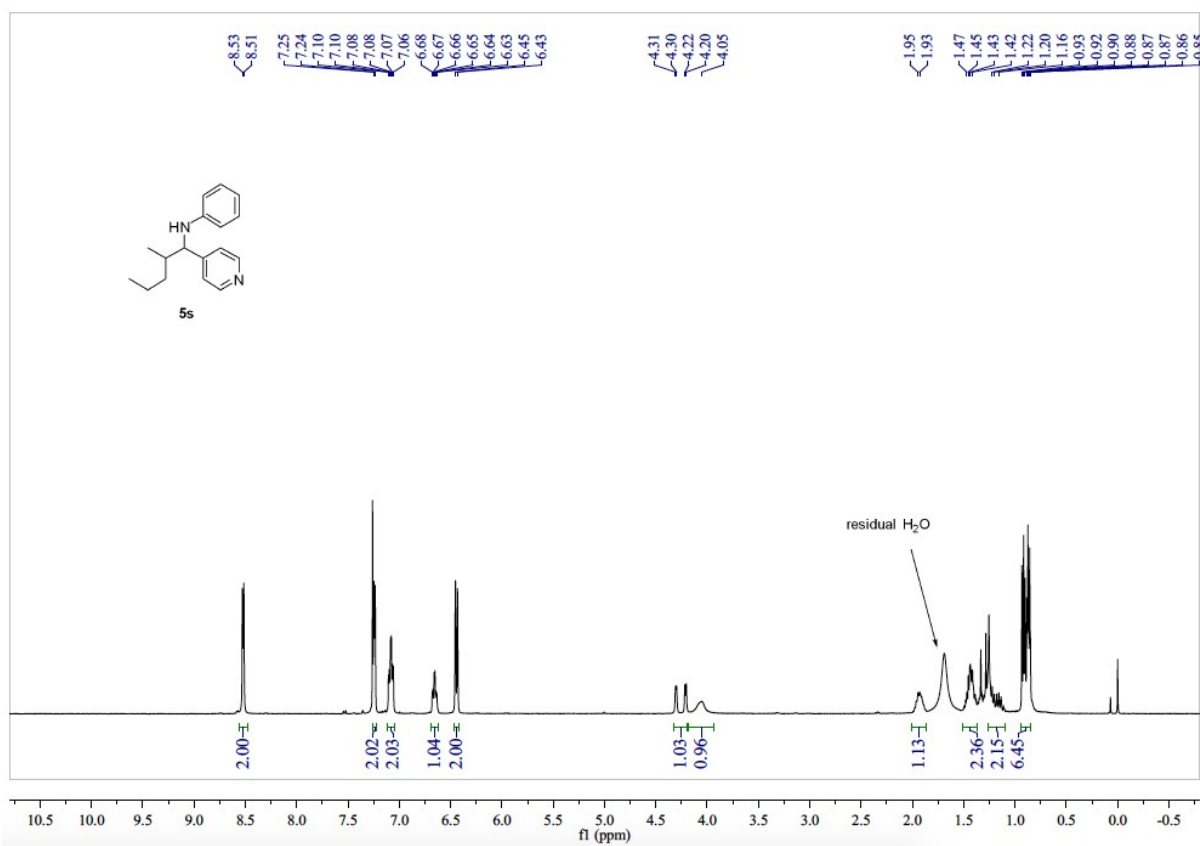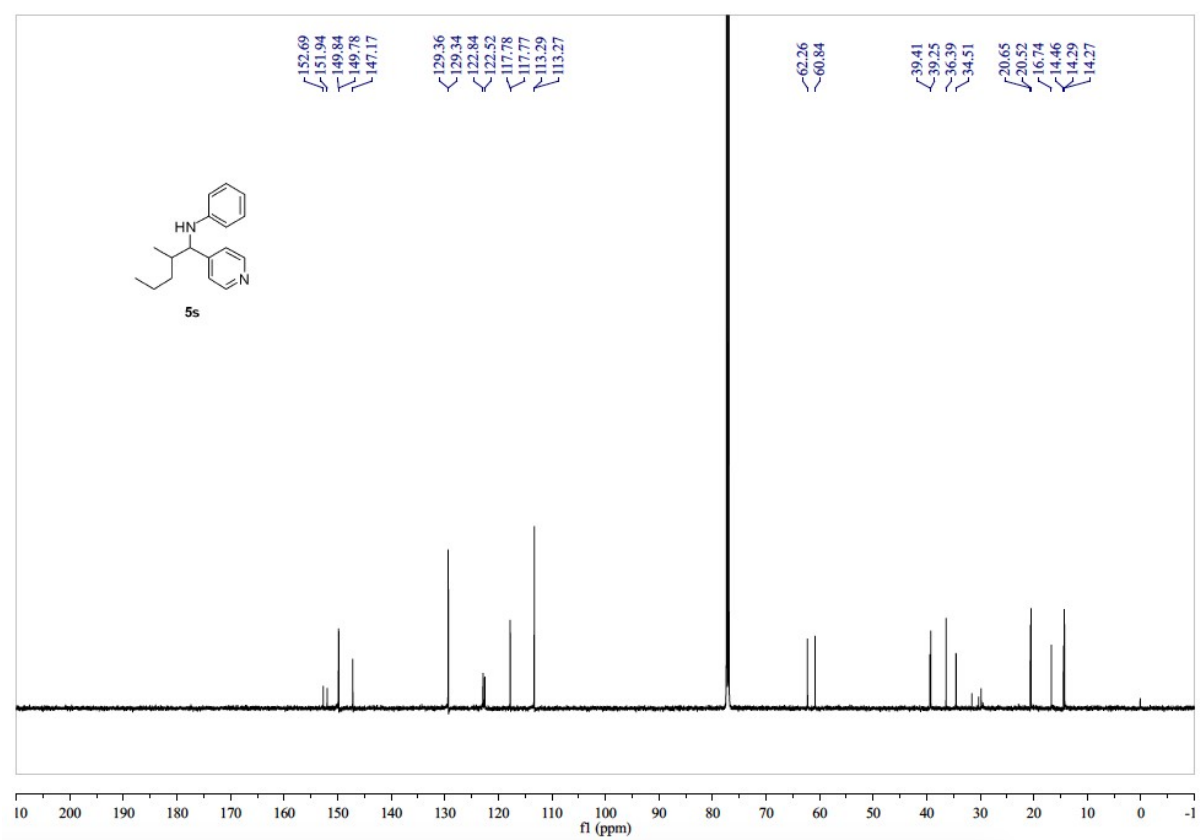

**6a: N-benzyl-1-(2-fluoropyridin-4-yl)-N-methyl-1-phenylmethanamine**

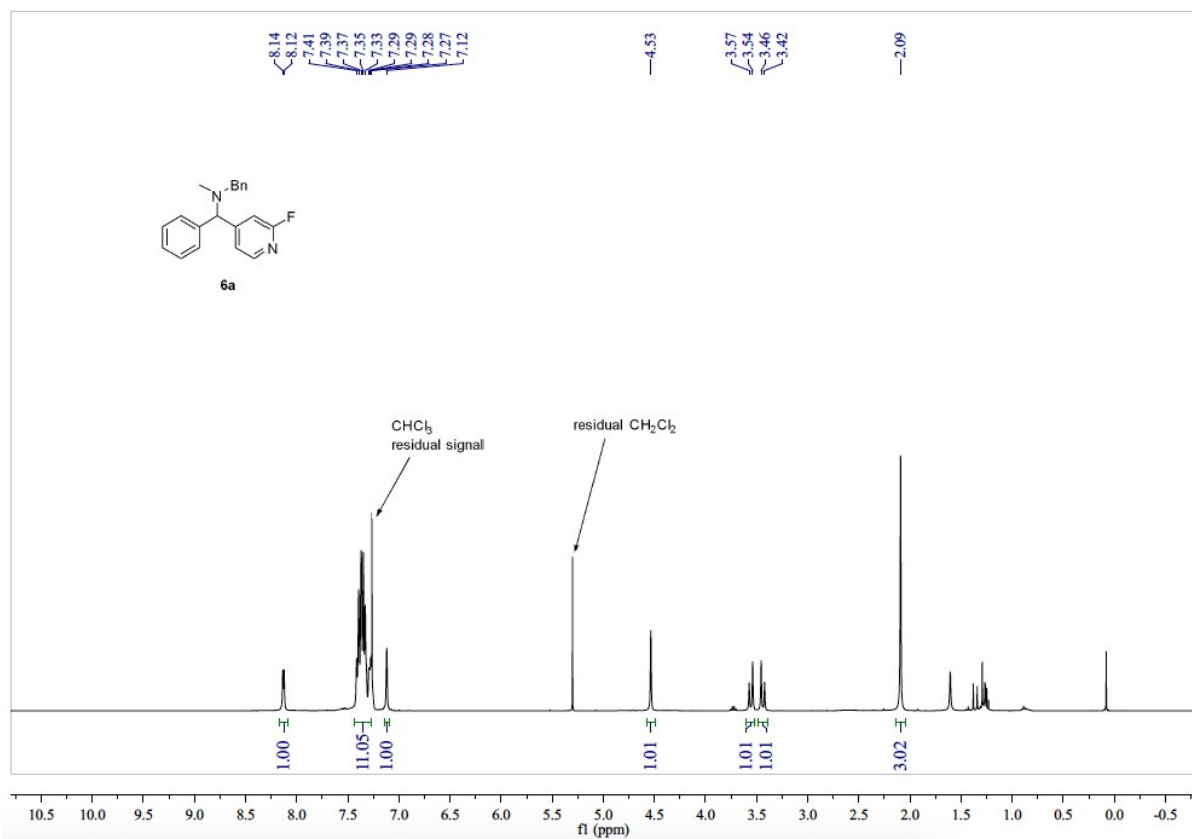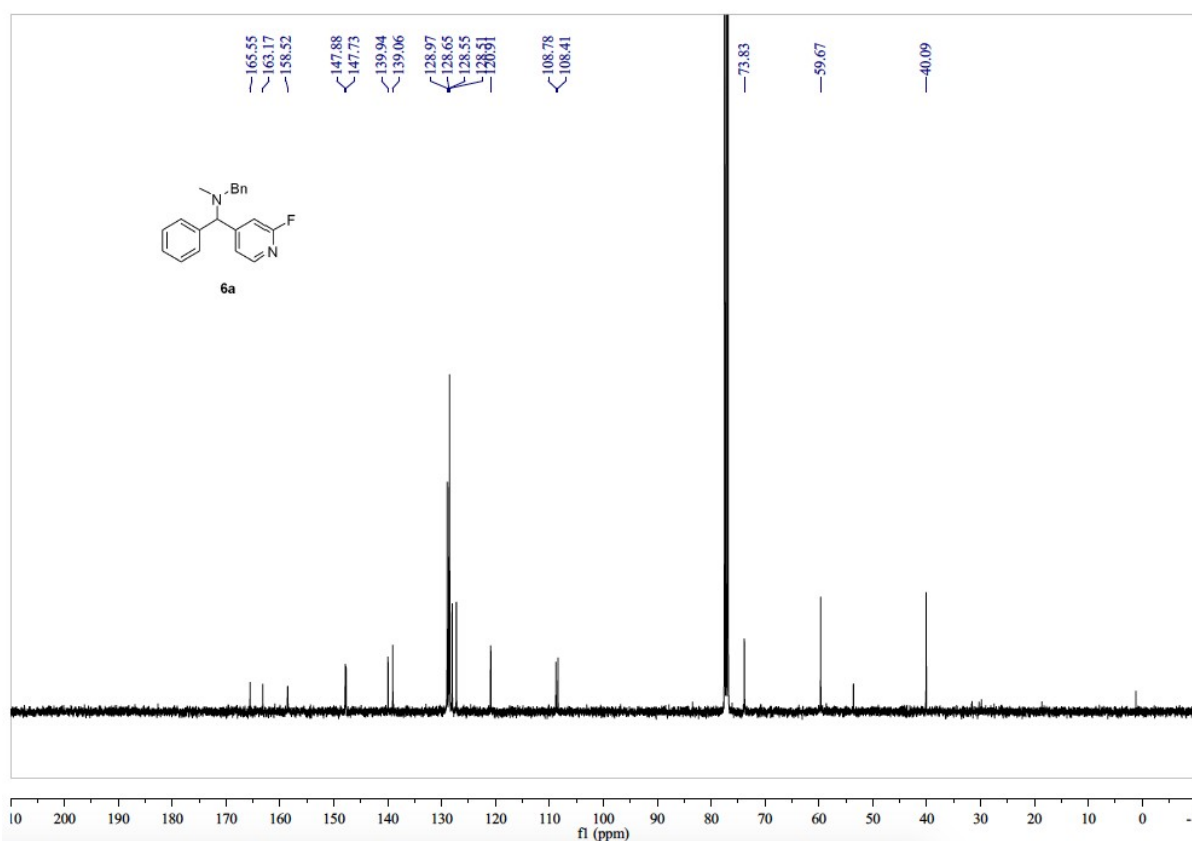

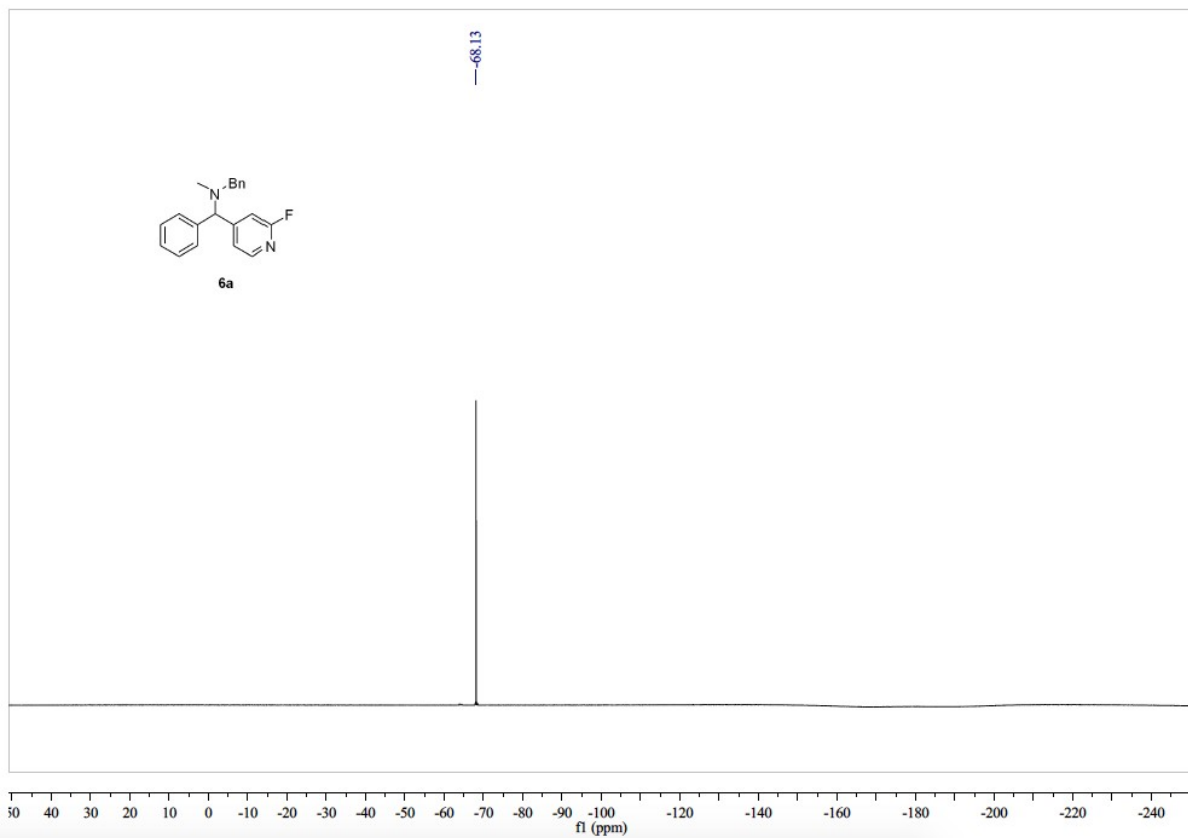

**6b: *N*-benzyl-1-(2-chloropyridin-4-yl)-*N*-methyl-1-phenylmethanamine**

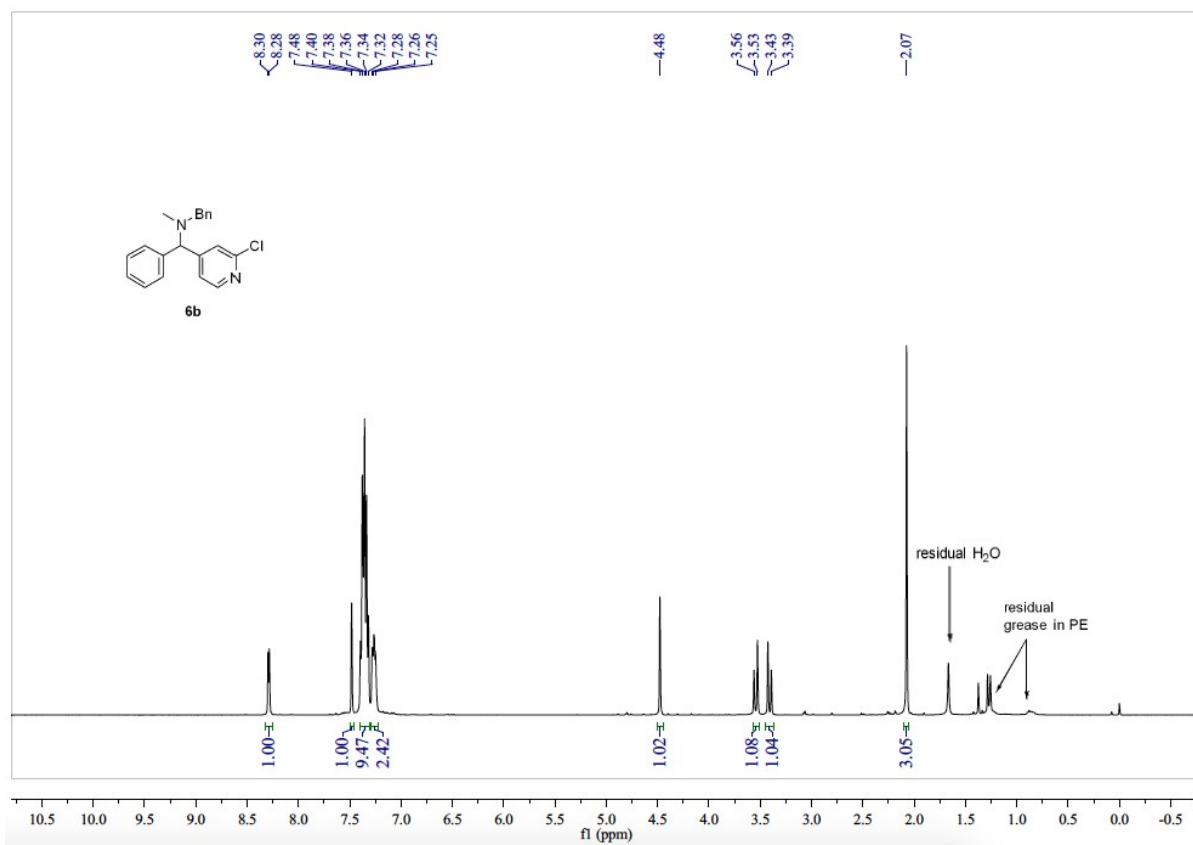



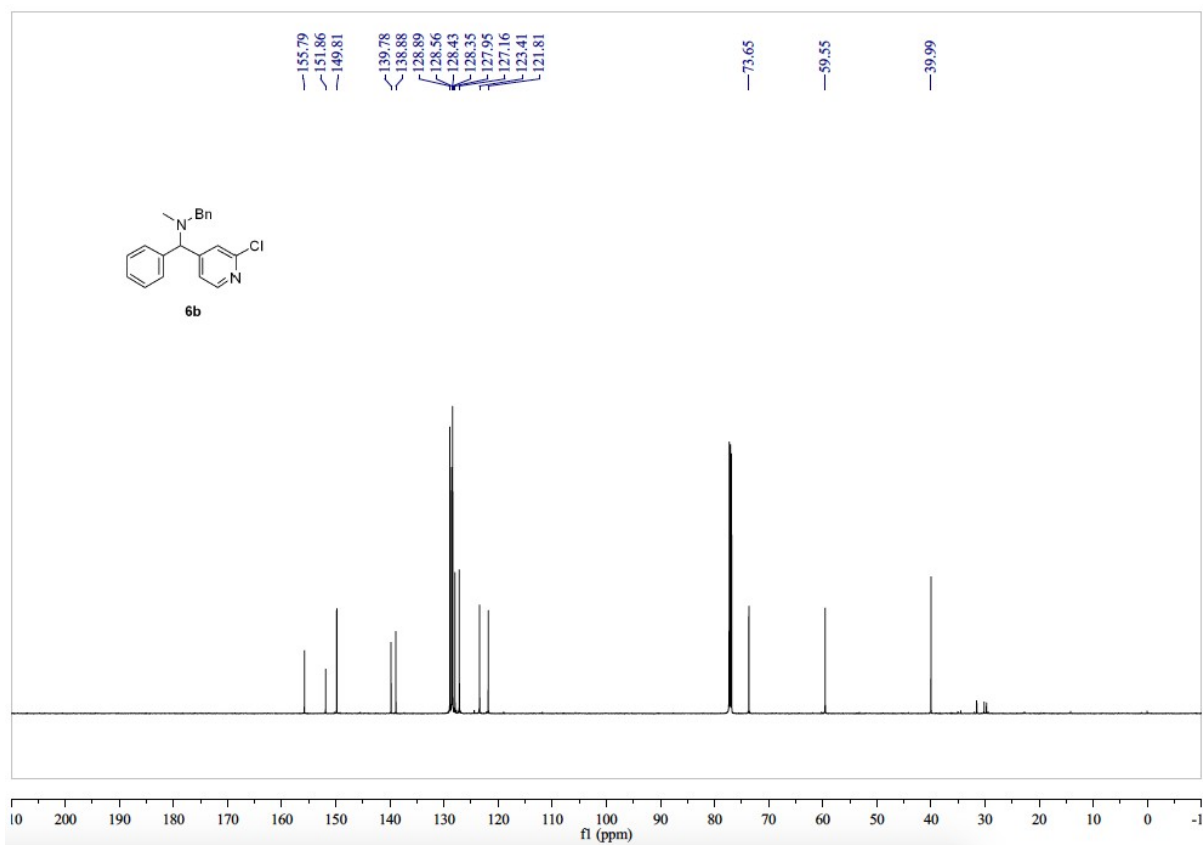

**6c: methyl 4-((benzyl(methyl)amino)(phenyl)methyl)picolinate**

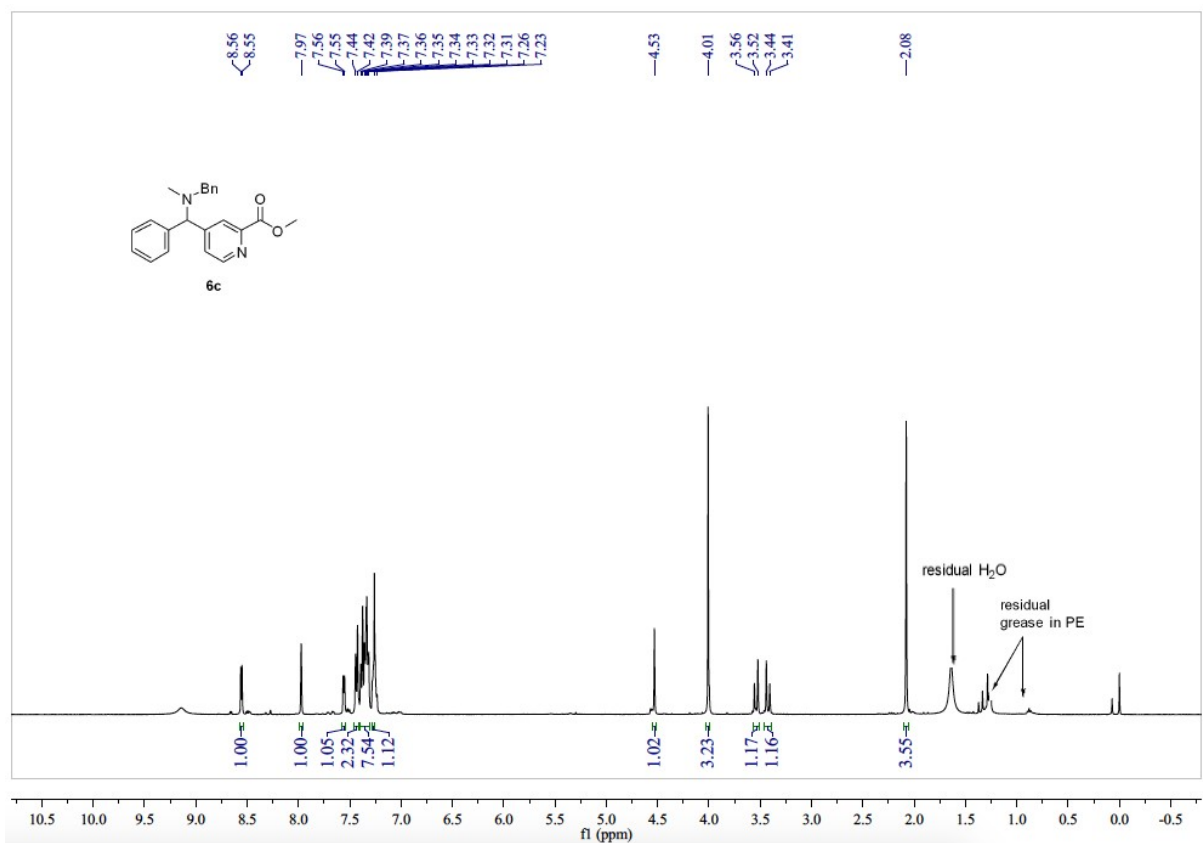

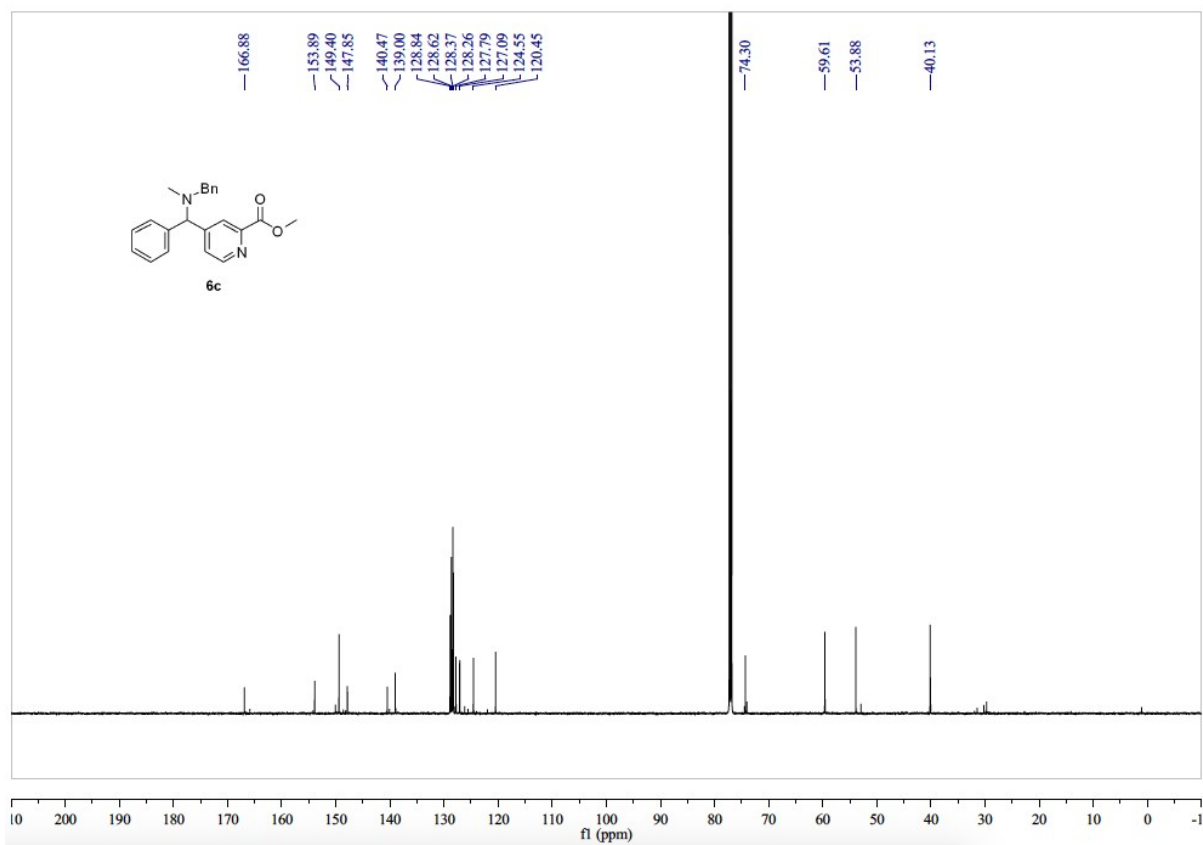

**6d: N-((3-bromopyridin-4-yl)(phenyl)methyl)aniline**

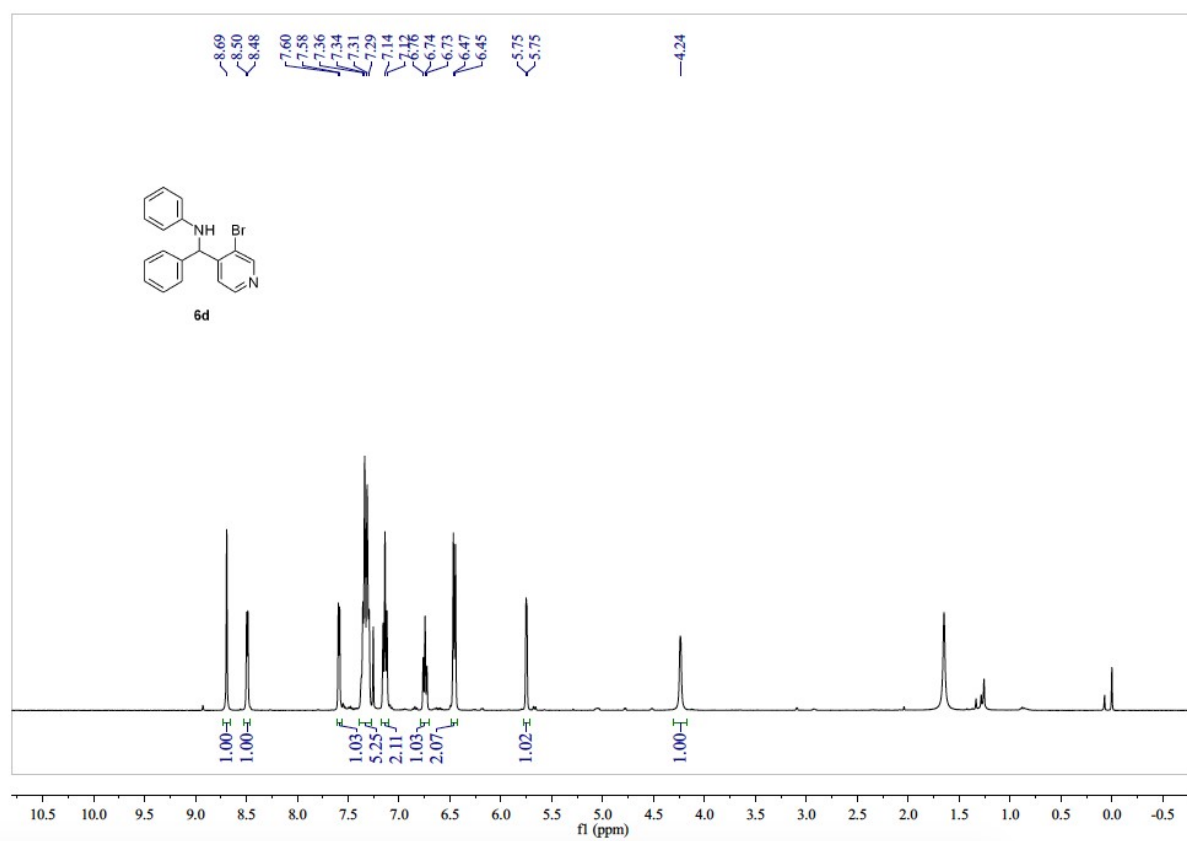

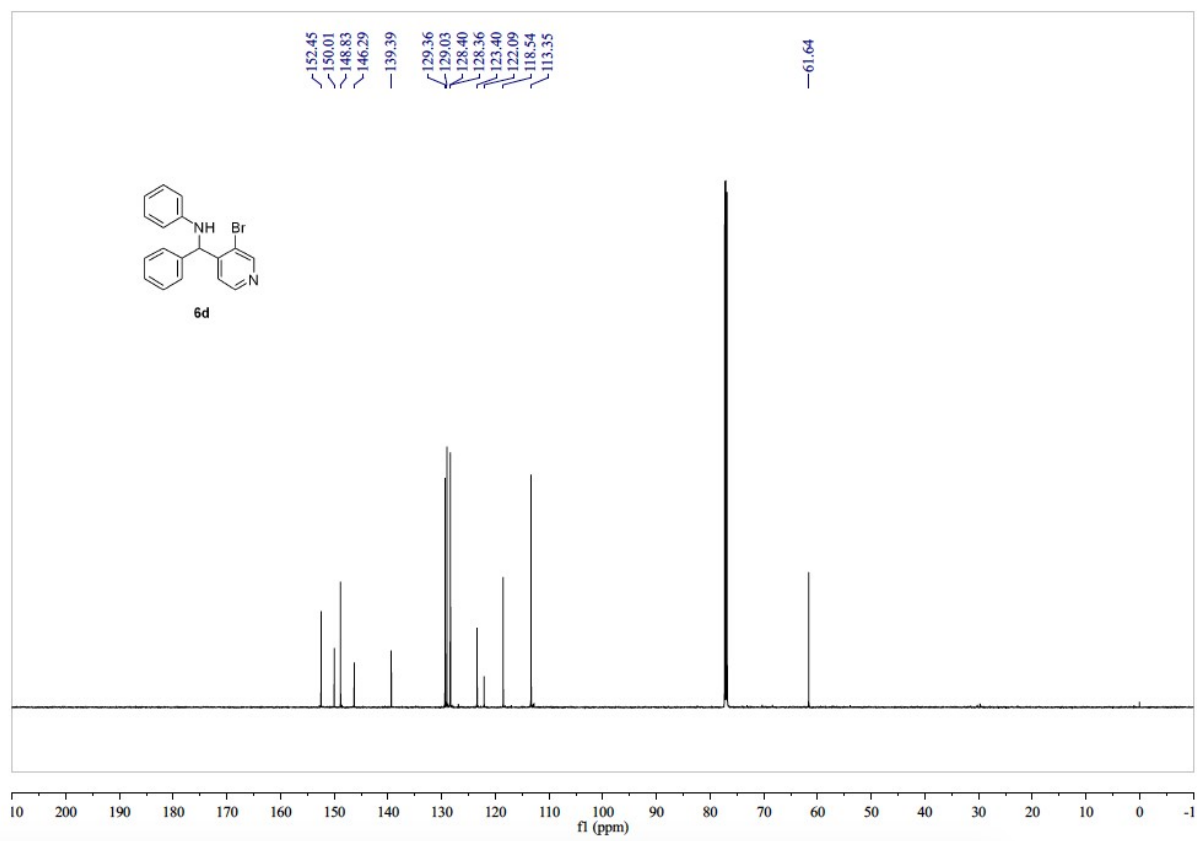

**6e**: *N*-((3,5-difluoropyridin-4-yl)(phenyl)methyl)aniline

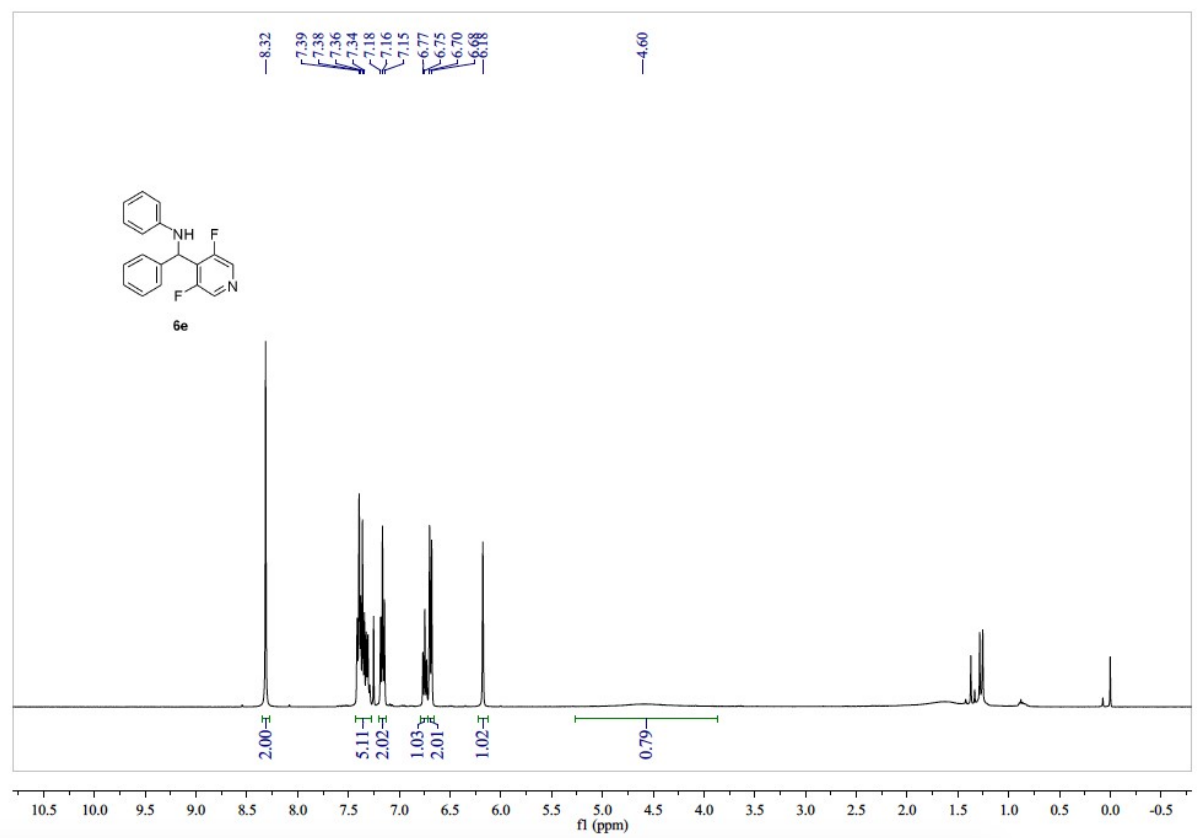

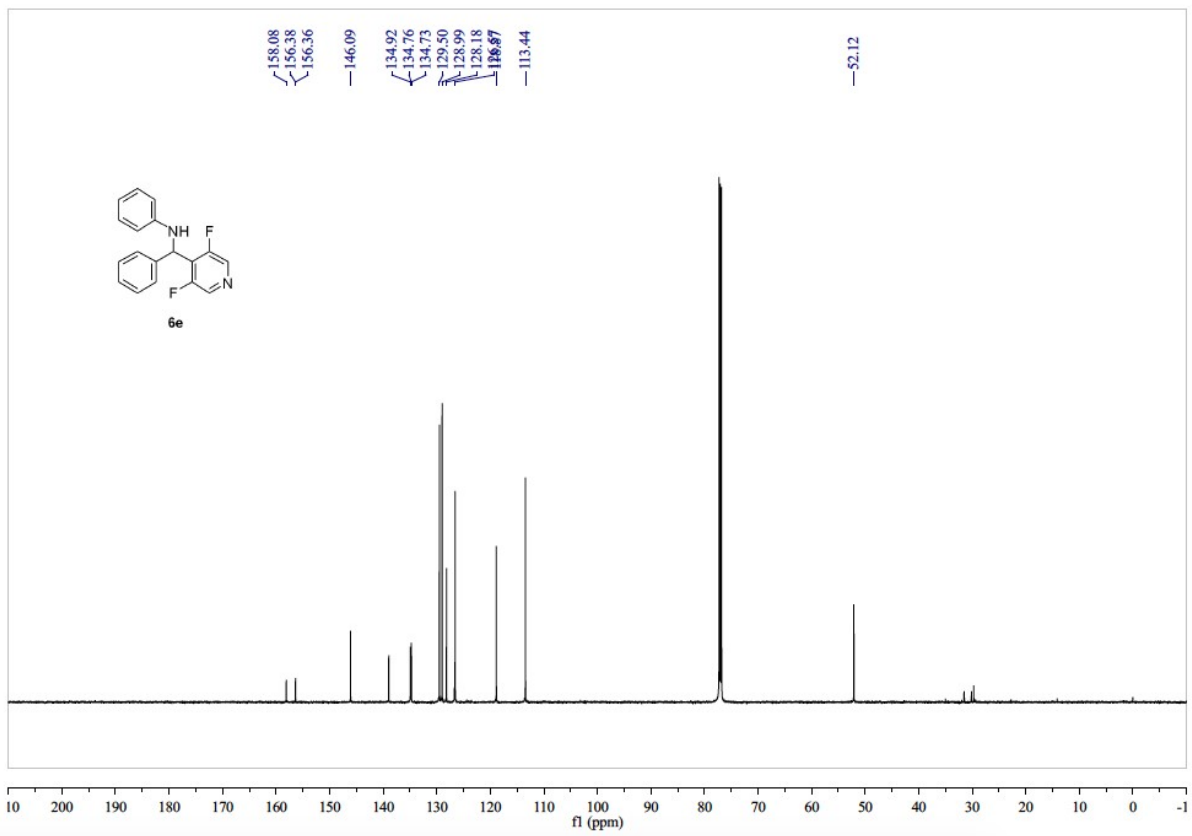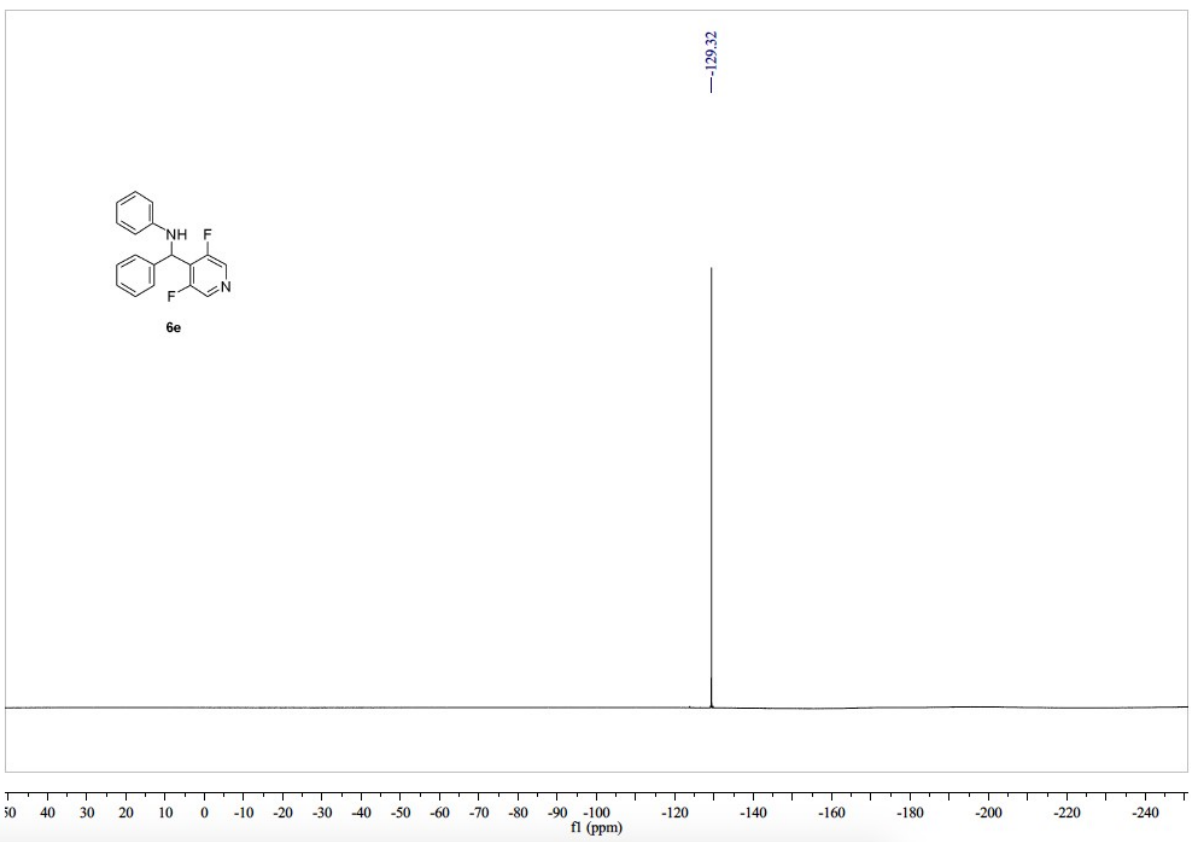

**6f: *N*-benzyl-*N*-methyl-1-phenyl-1-(pyridin-4-yl)methanamine**

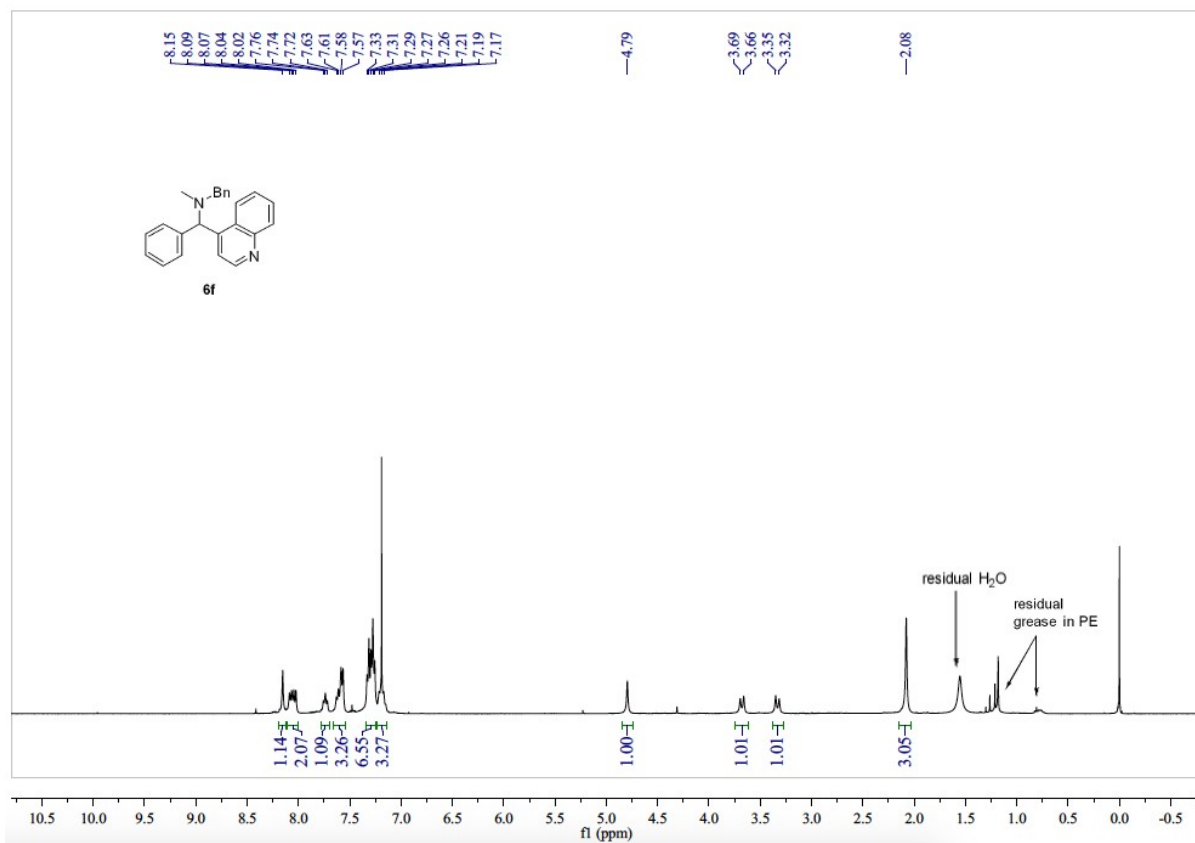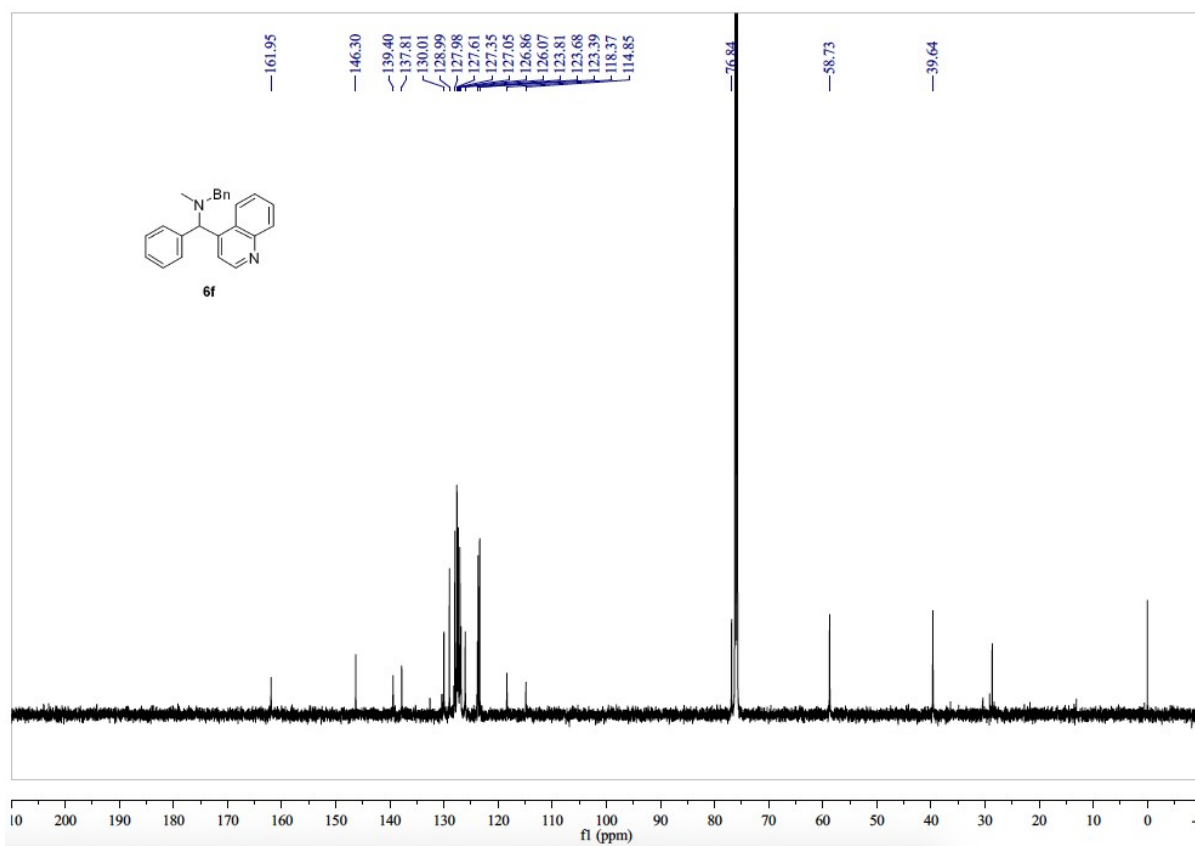

**6g: N-benzyl-N-methyl-1-phenyl-1-(quinolin-2-yl)methanamine**

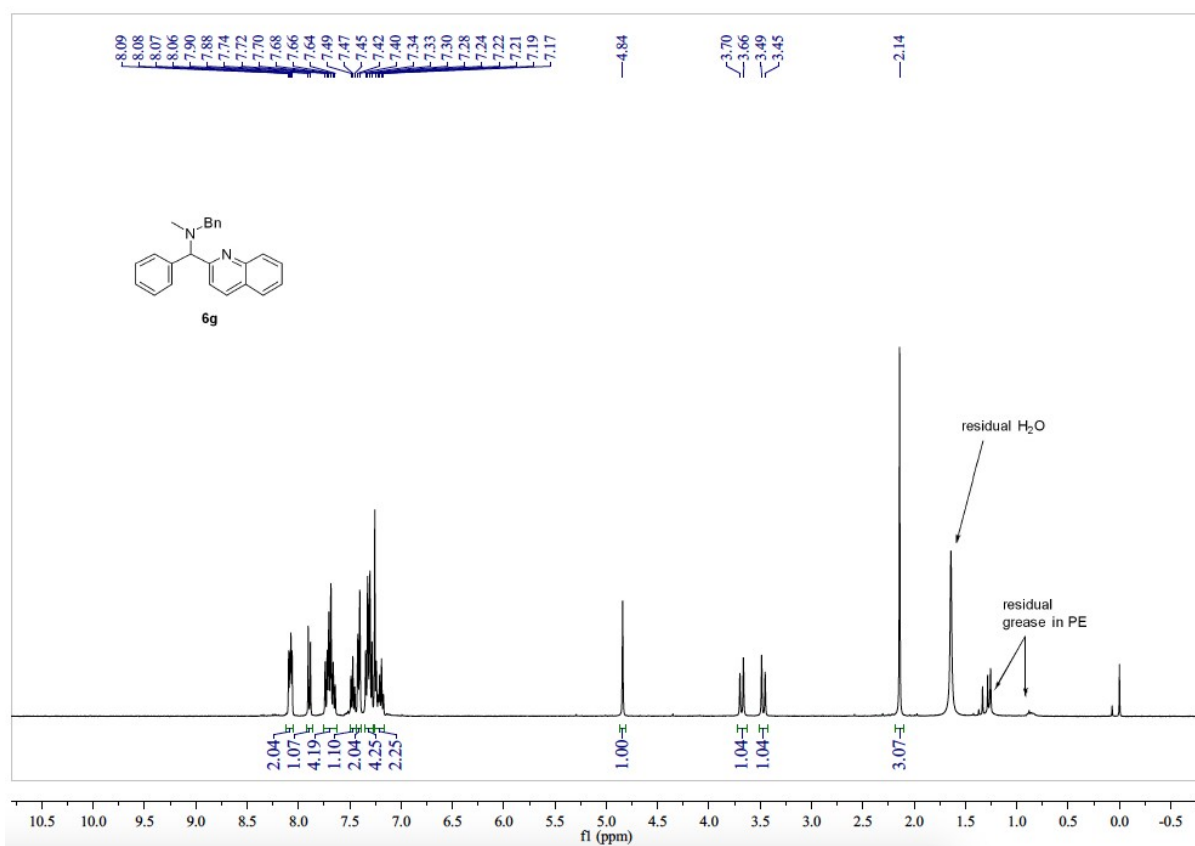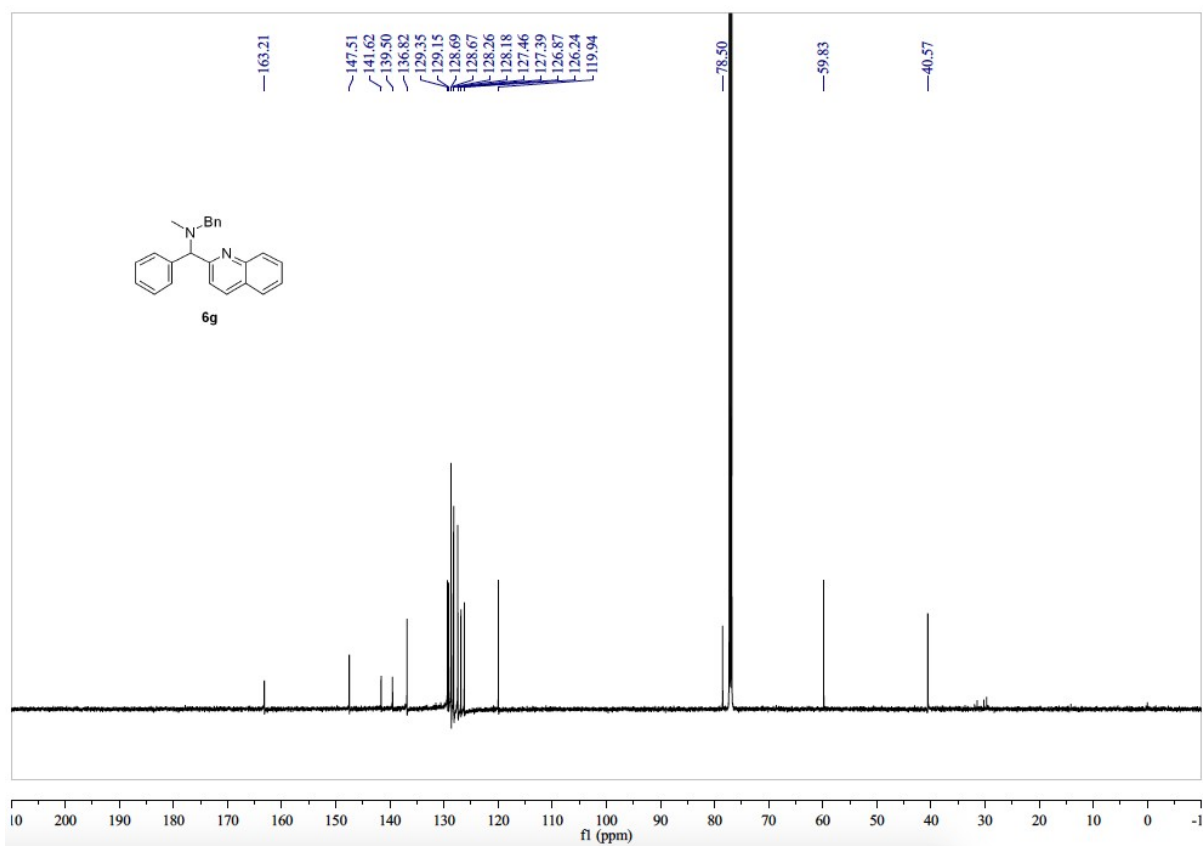

**6h: N-benzyl-1-(isoquinolin-1-yl)-N-methyl-1-phenylmethanamine**

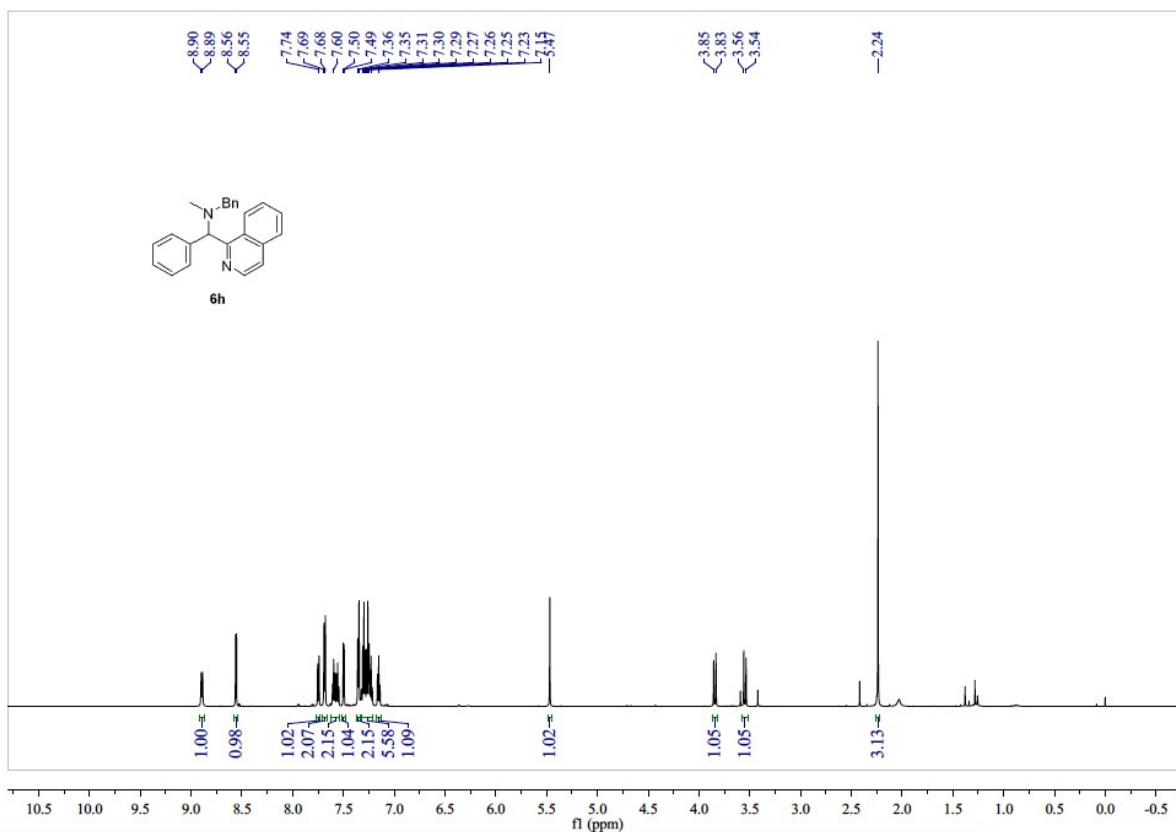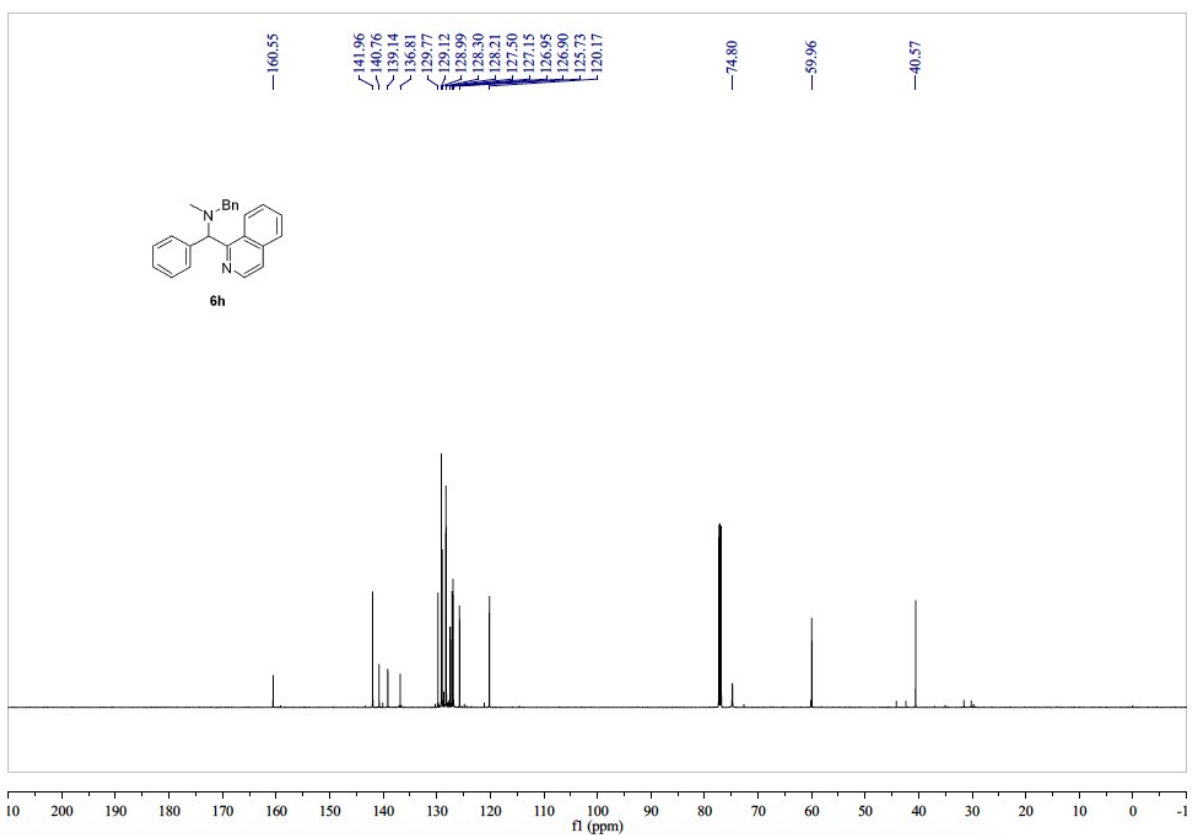

**9: ethyl 4-((4-bromophenyl)amino)-2-methylene-4-phenylbutanoate**

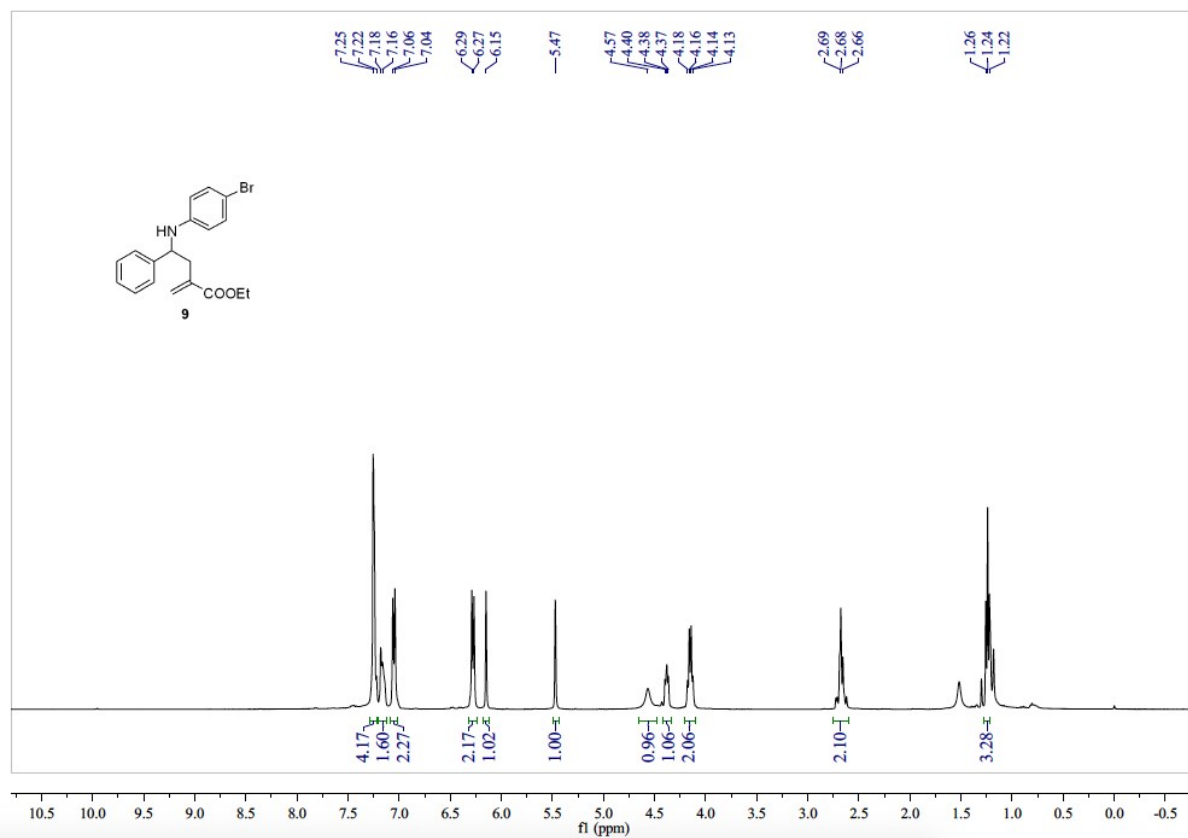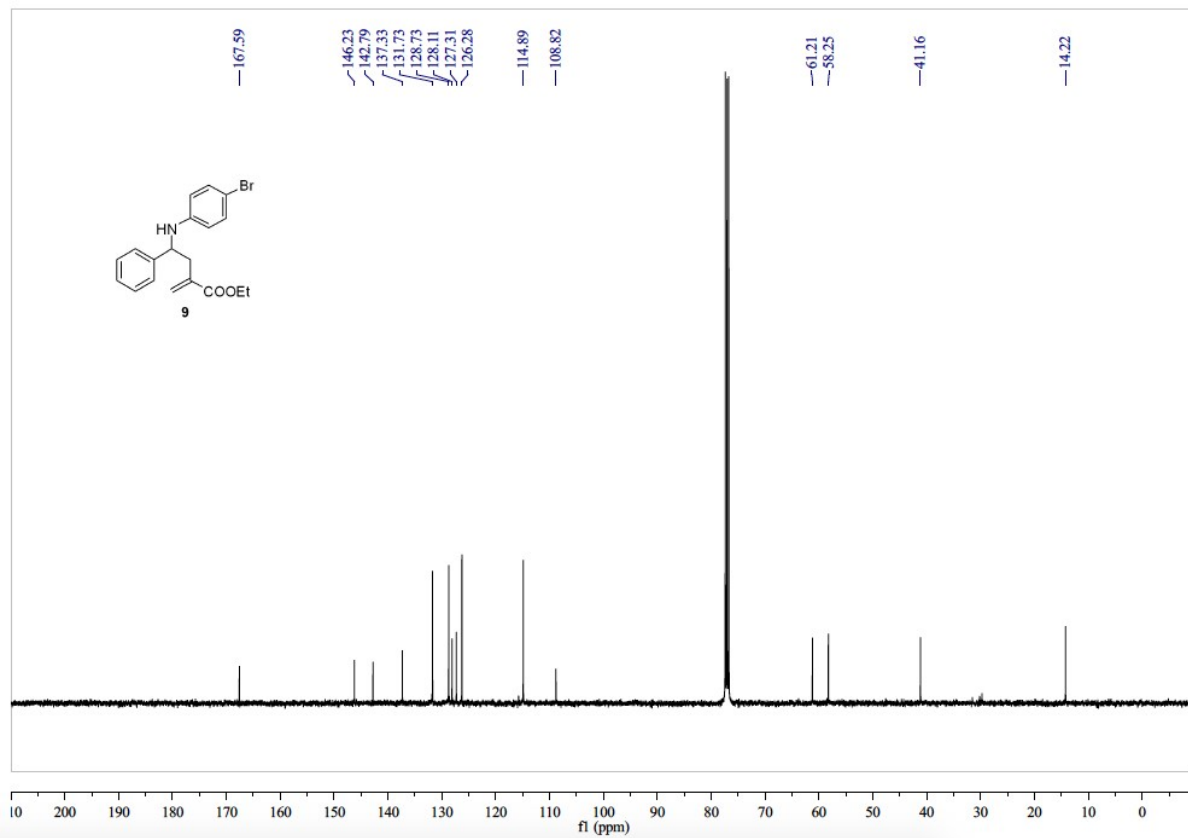

Supplement: d2cc05330f2.pdf [file d2cc05330f2.pdf]
