# Supplementary material for: Electricity-driven three-component reductive coupling reaction for the synthesis of diarylmethylamine
Source: Royal Society of Chemistry journal article supplement (doi:10.1039/d2cc05330f), 2022-01-01

a) Bioactive molecules with arylpyridylmethylamine substructures

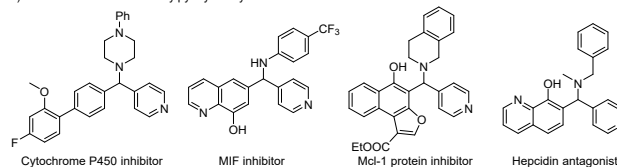

b) General approaches to synthesize diarylmethylamines

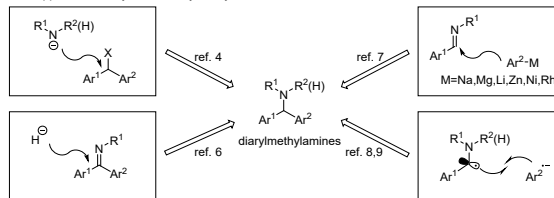

c) Electrochemical three-component reductive coupling reactions (this work)

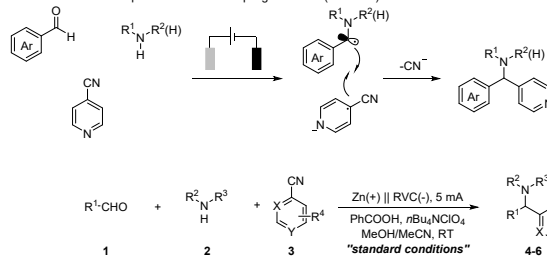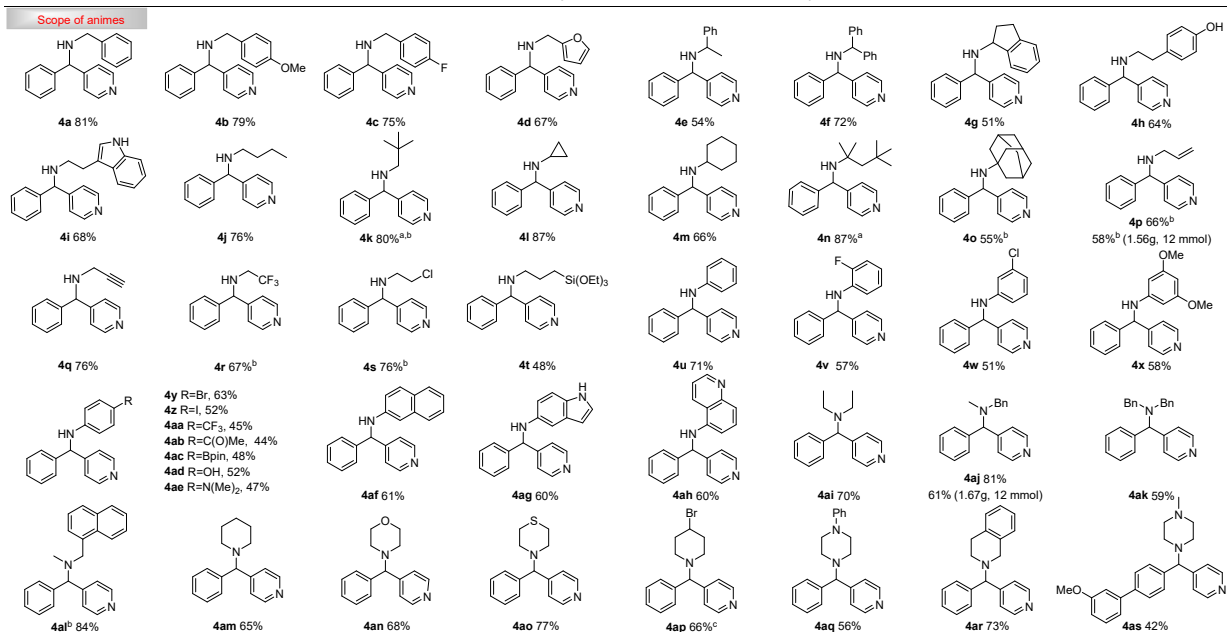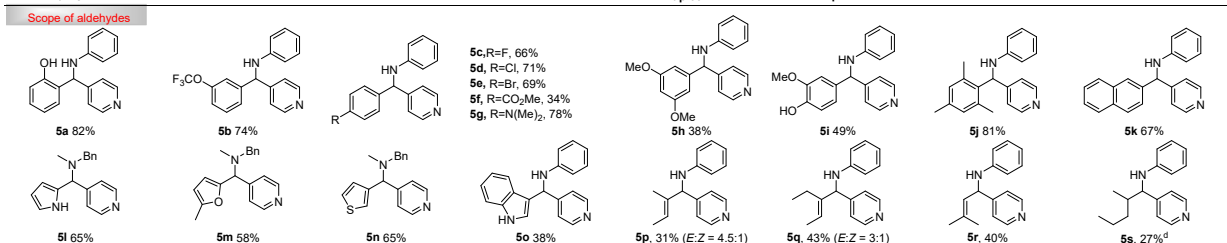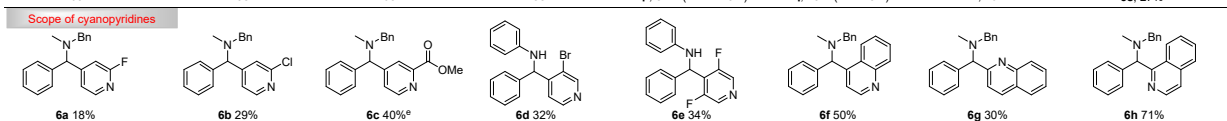

a) Divided cell electrolysis

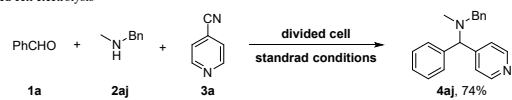

b) Reaction of prepared imine with 4-cyanopyridine

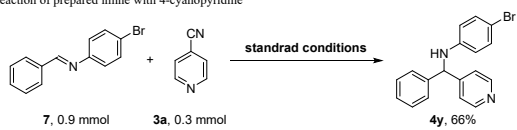

c) Radical trapping experiment

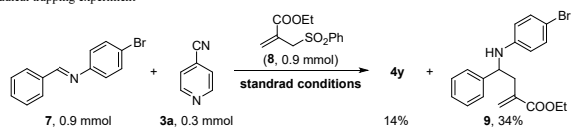

Supplement: d2cc05330f1.pdf [file d2cc05330f1.pdf]
